# Supplementary material for: Comprehensive Transcriptome Study to Develop Molecular Resources of the Copepod Calanus sinicus for Their Potential Ecological Applications
Source: Biomed Res Int. 2014 May 20;2014:493825. doi: 10.1155/2014/493825 (PMC4055022; doi:10.1155/2014/493825)
Supplement: Supplementary file 1 — Gene ontology (GO) enrichment analysis was done on Biological_process, Cellular_component and Molecular_function levels. GO terms involved in response to stimulus were identified. KEGG pathway analysis was also carried out in addition to GO analysis for the annotated unigenes. Genes involved in the lipid metabolism, immune system and development were identified. [file 493825.f1.xlsx]

## Sheet: GO response to stimulus
transcript_id	Qeury_length	ORF	NR_tophit_name	NR_tophit_description	NR_topHSP_%-Simil	GOs	String_tophit_name	String_tophit_description	String_topHSP_%-Simil	COG	KOG	NOG	KO/Gene_ID	KEGG_GENE_NAME
comp1002487_c0_seq1	158	1-474(+)	gi|115361507|gb|ABI95854.1|	GABA-alpha subunit [Lepeophtheirus salmonis]	0.9	GO:0006821;GO:0005230;GO:0007214;GO:0016021;GO:0030054;GO:0004890;GO:0005886;GO:0045211	7222.FBpp0149546	GH15640	0.8562	_	KOG3643	_	K05195	GLRA3
comp1006590_c0_seq1	136	2-409(-)	gi|241627156|ref|XP_002407991.1|	G-protein coupled receptor, putative [Ixodes scapularis]	0.64	GO:0007165;GO:0004871	_	_	_	_	_	_	None	_
comp100824_c0_seq1	185	2-556(+)	gi|225719530|gb|ACO15611.1|	Calmodulin [Caligus clemensi]	0.81	GO:0000922;GO:0031997;GO:0005813;GO:0043274;GO:0051592;GO:0044325;GO:0019904;GO:0005509;GO:0031432;GO:0032465;GO:0031996;GO:0005876	7668.XP_001196877	similar to calmodulin 2	0.7905	COG5126	KOG0027	NOG277755	K02183	CALM
comp1010012_c0_seq1	240	1-720(-)	gi|197209914|ref|NP_001127721.1|	neuropeptide receptor A23 [Bombyx mori]	0.75	GO:0007186;GO:0004930	_	_	_	_	_	_	K14071	LKR
comp1011242_c0_seq1	135	1-405(-)	gi|391325082|ref|XP_003737069.1|	PREDICTED: glutamate receptor 1-like [Metaseiulus occidentalis]	0.93	GO:0030054;GO:0006811;GO:0035235;GO:0005234;GO:0004970;GO:0016021;GO:0007268;GO:0030288;GO:0005886;GO:0045211	_	_	_	_	_	_	K05197	GRIA1
comp1012183_c0_seq1	153	3-461(+)	gi|195430470|ref|XP_002063277.1|	GK21476 [Drosophila willistoni]	0.73	GO:0016020;GO:0004888;GO:0007166	_	_	_	_	_	_	K04578	CRHR1
comp1014516_c0_seq1	266	2-802(+)	gi|498928882|ref|XP_004518513.1|	PREDICTED: teneurin-a-like isoform X1 [Ceratitis capitata]	0.7	GO:0007160;GO:0031594;GO:0042734;GO:0051124;GO:0005886;GO:0016200;GO:0005578	_	_	_	_	_	_	None	_
comp1015113_c0_seq1	194	1-585(+)	gi|391338112|ref|XP_003743405.1|	PREDICTED: voltage-dependent calcium channel type A subunit alpha-1-like [Metaseiulus occidentalis]	0.8	GO:0070588;GO:0016323;GO:0006967;GO:0048786;GO:0046843;GO:0042994;GO:0006911;GO:0050908;GO:0016324;GO:0008344;GO:0031594;GO:0007632;GO:0008331;GO:0005737;GO:0008332;GO:0042045;GO:0007602;GO:0005667;GO:0008063;GO:0046928;GO:0006974;GO:0045087;GO:0030097;GO:0045433;GO:0034765;GO:0002027;GO:0009950;GO:0005509;GO:0008134;GO:0005891;GO:0045887;GO:0006887	7159.AAEL004201-PA	voltage-dependent p/q type calcium channel	0.8489	COG1226	_	_	None	_
comp1016342_c0_seq1	176	1-528(-)	gi|345480050|ref|XP_003424076.1|	PREDICTED: E3 ubiquitin-protein ligase mib1-like [Nasonia vitripennis]	0.91	GO:0045747;GO:0060113;GO:0021654;GO:0021520;GO:0051865;GO:0001756;GO:0001570;GO:0048793;GO:0007368;GO:0031076;GO:0021508;GO:0061195;GO:0048471;GO:0030139;GO:0000151;GO:0021521;GO:0002090;GO:0071599;GO:0021519;GO:0048546;GO:0009880;GO:0008270;GO:0030318;GO:0005886;GO:0045685;GO:0060218;GO:0045664;GO:0021986;GO:0001885;GO:0042803;GO:0004842;GO:0008284	7070.XP_974870	similar to mindbomb homolog 1	0.9091	COG0666	KOG0504	_	K10645	MIB
comp1016476_c0_seq1	161	1-486(+)	gi|328719853|ref|XP_001948604.2|	PREDICTED: tyrosine-protein kinase transmembrane receptor Ror-like [Acyrthosiphon pisum]	0.86	GO:0007169;GO:0005524;GO:0016021;GO:0006468;GO:0004714	6945.ISCW010222-PA	tyrosine kinase orphan receptor, putative	0.8944	COG0515	_	_	K05122	ROR1, NTRKR1
comp1019457_c0_seq1	407	_	gi|498979767|ref|XP_004529189.1|	PREDICTED: tachykinin-like peptides receptor 86C-like isoform X1 [Ceratitis capitata]	0.56	GO:0007217;GO:0005887;GO:0007268;GO:0004995;GO:0007187	_	_	_	_	_	_	K04225	TAKR
comp1019850_c0_seq1	115	92-439(+)	gi|512907119|ref|XP_004926364.1|	PREDICTED: protein slit-like [Bombyx mori]	0.71	GO:0016020;GO:0033564;GO:0007414;GO:0021510;GO:0050919;GO:0007166;GO:0005488;GO:0007420;GO:0071310;GO:0001763;GO:0030517;GO:0009725;GO:0005576;GO:0005739;GO:0003262	_	_	_	_	_	_	K06839	SLIT2
comp101986_c0_seq1	148	1-444(-)	gi|260807397|ref|XP_002598495.1|	hypothetical protein BRAFLDRAFT_66872 [Branchiostoma floridae]	0.78	GO:0004709;GO:0005524;GO:0009069;GO:0007178;GO:0000186	_	_	_	_	_	_	K04422	MAP3K13, LZK
comp1019919_c0_seq1	251	2-757(+)	gi|224050225|ref|XP_002198384.1|	PREDICTED: fibroblast growth factor receptor 3 [Taeniopygia guttata]	0.46	GO:0016043;GO:0009888;GO:0048666;GO:0004713;GO:0005515;GO:0048523;GO:0001934;GO:0008543;GO:0005886;GO:0018108;GO:0043085;GO:0043583;GO:0007417;GO:0009887;GO:0009790;GO:0043410;GO:0051094;GO:0001501;GO:0008284;GO:0050767	_	_	_	_	_	_	K05094	FGFR3
comp1020703_c0_seq1	566	_	gi|195164780|ref|XP_002023224.1|	GL21243 [Drosophila persimilis]	0.66	GO:0008152;GO:0007165;GO:0005622;GO:0005488	_	_	_	_	_	_	K12491	AGAP1_2_3
comp1023286_c0_seq1	196	123-710(-)	gi|321470631|gb|EFX81606.1|	hypothetical protein DAPPUDRAFT_224067 [Daphnia pulex]	0.84	GO:0006804;GO:0006979;GO:0020037;GO:0004601;GO:0055114	_	_	_	_	_	_	None	_
comp1023338_c0_seq1	120	3-362(-)	gi|443716053|gb|ELU07730.1|	hypothetical protein CAPTEDRAFT_114192 [Capitella teleta]	0.82	GO:0038032;GO:0005834;GO:0004871;GO:0035556	_	_	_	_	_	_	None	_
comp1024643_c0_seq1	222	3-668(-)	gi|195119101|ref|XP_002004070.1|	GI19631 [Drosophila mojavensis]	0.72	GO:0003707;GO:0006355;GO:0005667;GO:0008270;GO:0043565;GO:0043401;GO:0003700;GO:0045449	7739.JGI84128	hypothetical protein	0.9783	_	KOG3575;KOG4217	_	K08558	NR4A2, NURR1
comp1024820_c0_seq1	399	_	gi|351722287|ref|NP_001235959.1|	GTP-binding protein [Glycine GTP-binding protein [Glycine max]	0.79	GO:0007264;GO:0005622;GO:0005525;GO:0015031	436017.A4RSM6	predicted protein	0.8182	COG1100	_	_	K07976	RAB
comp1026583_c0_seq1	125	73-450(+)	gi|115361507|gb|ABI95854.1|	GABA-alpha subunit [Lepeophtheirus salmonis]	0.97	GO:0001505;GO:0005230;GO:0007214;GO:0030054;GO:0034707;GO:0008503;GO:0006821;GO:0005254;GO:0004890;GO:0030285;GO:0005886;GO:0006836;GO:0045211	_	_	_	_	_	_	K05195	GLRA3
comp1027238_c0_seq1	170	119-628(-)	gi|210077497|gb|ACJ07013.1|	nicotinic acetylcholine receptor beta 1 subunit [Nilaparvata lugens]	0.72	GO:0004889;GO:0007165;GO:0016021;GO:0030054;GO:0006812;GO:0005886;GO:0045211	_	_	_	_	_	_	K05312	CHRNN
comp1030887_c0_seq1	172	1-519(+)	gi|195442824|ref|XP_002069146.1|	GK24333 [Drosophila willistoni]	0.75	GO:0001505;GO:0005216;GO:0007214;GO:0030285;GO:0006836;GO:0006811;GO:0008503	7222.FBpp0149546	GH15640	0.8014	_	KOG3643	_	K05195	GLRA3
comp1033394_c0_seq1	137	1-414(+)	gi|194883132|ref|XP_001975658.1|	GG20437 [Drosophila erecta]	0.58	GO:0016020;GO:0031427;GO:0008354;GO:0016887;GO:0044765;GO:0001666	_	_	_	_	_	_	K05658	ABCB1
comp103420_c0_seq1	153	1-462(+)	gi|321457093|gb|EFX68186.1|	hypothetical protein DAPPUDRAFT_228995 [Daphnia pulex]	0.58	GO:0016327;GO:0005921;GO:0016324;GO:0005243;GO:0007267;GO:0030727;GO:0007440;GO:0016331;GO:0042048;GO:0010496	_	_	_	_	_	_	None	_
comp1034510_c0_seq1	743	_	gi|242006518|ref|XP_002424097.1|	toll, putative [Pediculus humanus corporis]	0.65	GO:0007165;GO:0006955;GO:0042742	_	_	_	_	_	_	None	_
comp1034680_c0_seq1	239	5-721(-)	gi|260832311|ref|XP_002611101.1|	hypothetical protein BRAFLDRAFT_206058 [Branchiostoma floridae]	0.57	GO:0044260;GO:0006950;GO:0044238	_	_	_	_	_	_	K10570	ERCC8, CKN1, CSA
comp1039556_c0_seq1	133	1-402(+)	gi|390358061|ref|XP_782989.3|	PREDICTED: palmitoyltransferase ZDHHC17 [Strongylocentrotus purpuratus]	0.73	GO:0018345;GO:0042967;GO:0030660;GO:0019706;GO:0015693;GO:0043123;GO:0046872;GO:0005515;GO:0004871;GO:0042953;GO:0015095	_	_	_	_	_	_	None	_
comp1039842_c0_seq1	209	3-632(+)	gi|242005379|ref|XP_002423546.1|	cAMP/cGMP cyclic nucleotide phosphodiesterase, putative [Pediculus humanus corporis]	0.86	GO:0046872;GO:0007165;GO:0005886;GO:0047555;GO:0046068	_	_	_	_	_	_	K13763	PDE6N
comp1040847_c0_seq1	169	2-508(-)	gi|157133851|ref|XP_001663040.1|	hypothetical protein AaeL_AAEL012909 [Aedes aegypti]	0.5	GO:0044700;GO:0000981;GO:0003677;GO:0000278;GO:0009888;GO:0042127;GO:0006259;GO:0044446;GO:0045893;GO:0048666;GO:0006357;GO:0032989;GO:0002376;GO:0005515;GO:0050896;GO:0051239;GO:0005634;GO:0007154;GO:0030707;GO:0007476;GO:0022402;GO:0043234;GO:0045476;GO:0042981	_	_	_	_	_	_	None	_
comp104414_c0_seq1	245	82-819(+)	gi|16797882|gb|AAL29199.1|AF323686_1	nuclear receptor AmNR6 [Acropora millepora]	0.58	GO:0003677;GO:0030182;GO:0007420;GO:0006357;GO:0048522;GO:0005515;GO:0005667;GO:0050896;GO:0048646;GO:0045449;GO:0003700	_	_	_	_	_	_	K08559	NR4A3, NOR1
comp1046042_c0_seq1	1311	_	gi|348505735|ref|XP_003440416.1|	PREDICTED: guanine nucleotide-binding protein G(i) subunit alpha-1-like isoform 2 [Oreochromis niloticus]	0.67	GO:0007186;GO:0000166	_	_	_	_	_	_	K04534	GNAO, G-ALPHA-O
comp1046348_c0_seq1	237	2-712(-)	gi|170034658|ref|XP_001845190.1|	conserved hypothetical protein [Culex quinquefasciatus]	0.56	GO:0007186;GO:0004871	7176.CPIJ003420-PA	conserved hypothetical protein	0.7529	_	KOG3656	_	None	_
comp1048924_c0_seq1	172	2-520(+)	gi|189234774|ref|XP_974911.2|	PREDICTED: similar to CG3822 CG3822-PA [Tribolium castaneum]	0.74	GO:0016020;GO:0007165;GO:0005230;GO:0004872;GO:0071944;GO:0006811;GO:0045202	_	_	_	_	_	_	None	_
comp1052879_c0_seq1	243	3-734(+)	gi|281362479|ref|NP_001163712.1|	slowpoke, isoform S [Drosophila slowpoke, isoform S [Drosophila melanogaster]	0.72	GO:0042493;GO:0005249;GO:0043025;GO:0043005;GO:0005515;GO:0060072;GO:0071805;GO:0048512;GO:0045433;GO:0008076	_	_	_	_	_	_	K04936	KCNMA1
comp1054343_c0_seq1	158	3-479(+)	gi|241082898|ref|XP_002409036.1|	G-protein coupled receptor protein, putative [Ixodes scapularis]	0.65	GO:0016020;GO:0004871;GO:0007166	_	_	_	_	_	_	K04593	LPHN2
comp1054662_c0_seq1	492	_	gi|511007667|gb|EPB88950.1|	26S proteasome non-ATPase regulatory subunit 14 [Mucor circinelloides f. circinelloides 1006PhL]	0.84	GO:0000502;GO:0009651	_	_	_	_	_	_	K03030	PSMD14, RPN11, POH1
comp105524_c0_seq1	319	32-991(+)	gi|443711674|gb|ELU05339.1|	hypothetical protein CAPTEDRAFT_170724 [Capitella teleta]	0.83	GO:0004775;GO:0003878;GO:0019643;GO:0042709;GO:0046686;GO:0005618;GO:0005507;GO:0000166;GO:0005743;GO:0048037;GO:0005886	3055.JGI196570	succinyl-CoA ligase (EC:6.2.1.5)	0.8586	COG0074	KOG1255	_	K01899	LSC1
comp105635_c0_seq1	103	1-309(+)	gi|224994808|ref|NP_001139341.1|	apterous a [Tribolium castaneum]	0.69	GO:0005615;GO:0007451;GO:0046486;GO:0036011;GO:0007481;GO:0019497;GO:0042045;GO:0005667;GO:0008270;GO:0046658;GO:0003700;GO:0007411;GO:0007559;GO:0032504;GO:0045165;GO:0046656;GO:0048190;GO:0007517;GO:0007479;GO:0004035;GO:0007476;GO:0007526;GO:0045944;GO:0000977;GO:0016740;GO:0045449	_	_	_	_	_	_	K09373	LHX2_9
comp1057675_c0_seq1	169	2-511(+)	gi|241057106|ref|XP_002407808.1|	netrin, putative [Ixodes netrin, putative [Ixodes scapularis]	0.72	GO:0016358;GO:0033564;GO:0016525;GO:0001569;GO:0048665	_	_	_	_	_	_	K06843	NTN1
comp1059362_c0_seq1	175	1-528(+)	gi|357148218|ref|XP_003574676.1|	PREDICTED: endoplasmin-like [Brachypodium distachyon]	0.78	GO:0006457;GO:0005524;GO:0044434;GO:0006950;GO:0009628;GO:1901700;GO:0010035;GO:0051082	_	_	_	_	_	_	K04079	htpG, HSP90A
comp1061587_c0_seq1	186	1-561(+)	gi|52538141|emb|CAG25575.2|	putative diuretic hormone receptor I [Nilaparvata lugens]	0.58	GO:0007165;GO:0004871	_	_	_	_	_	_	None	_
comp1061597_c0_seq1	212	2-640(+)	gi|432931309|ref|XP_004081651.1|	PREDICTED: peripheral plasma membrane protein CASK-like isoform 1 [Oryzias latipes]	0.74	GO:0010839;GO:0030425;GO:0060170;GO:0016323;GO:0016310;GO:0042043;GO:0090280;GO:0005730;GO:0005829;GO:0004672;GO:0005911;GO:0000166;GO:0006144;GO:0015629;GO:0042734;GO:0061045;GO:0030165;GO:0005604;GO:0005652;GO:0016363;GO:0004385;GO:0090288;GO:0006886;GO:0008022;GO:0045944;GO:0043234;GO:0001953;GO:0032403	8364.ENSXETP00000010527	calcium/calmodulin-dependent serine protein kinase (MAGUK family) (EC:2.7.11.1)	0.7963	COG0515	_	_	K06103	CASK
comp106292_c0_seq1	173	1-522(+)	gi|197209918|ref|NP_001127723.1|	neuropeptide receptor A25 [Bombyx mori]	0.74	GO:0007186;GO:0004930	_	_	_	_	_	_	None	_
comp1065149_c0_seq1	139	135-551(-)	gi|298504044|gb|ADI86243.1|	bursicon beta subunit [Homarus gammarus]	0.69	GO:0007186;GO:0090175;GO:0007593;GO:0001664;GO:0031395;GO:0005179;GO:0018990	_	_	_	_	_	_	None	_
comp1066135_c0_seq1	190	3-572(-)	gi|328720350|ref|XP_001948864.2|	PREDICTED: CD109 antigen-like [Acyrthosiphon pisum]	0.59	GO:0006911;GO:0005515;GO:0046331;GO:0019731;GO:0043499;GO:0001878	_	_	_	_	_	_	None	_
comp106635_c0_seq1	504	2-1513(-)	gi|242007038|ref|XP_002424349.1|	breakpoint cluster region protein, putative [Pediculus humanus corporis]	0.76	GO:0005622;GO:0035023;GO:0043547;GO:0005096;GO:0005543;GO:0005089	_	_	_	_	_	_	None	_
comp107099_c0_seq1	128	2-385(-)	gi|91087161|ref|XP_975356.1|	PREDICTED: similar to high-affinity octopamine transporter protein [Tribolium castaneum]	0.62	GO:0005887;GO:0048265;GO:0006812;GO:0005328;GO:0006836	_	_	_	_	_	_	K05035	SLC6A2
comp107107_c0_seq1	439	_	gi|308488141|ref|XP_003106265.1|	CRE-NHR-3 protein [Caenorhabditis remanei]	0.54	GO:0010033	_	_	_	_	_	_	None	_
comp1075182_c0_seq1	131	3-395(-)	gi|321466593|gb|EFX77588.1|	nuclear receptor [Daphnia pulex]	0.53	GO:0050794;GO:0044699;GO:0042221;GO:0006351;GO:0005488	_	_	_	_	_	_	K08540	NR1I2, PXR
comp107779_c0_seq1	222	2-670(+)	gi|30466272|ref|NP_775393.2|	E3 ubiquitin-protein ligase mib1 [Danio rerio]	0.68	GO:0016020;GO:0001841;GO:0045747;GO:0060113;GO:0021654;GO:0045807;GO:0021520;GO:0051865;GO:0001756;GO:0001570;GO:0048793;GO:0031076;GO:0014069;GO:0021508;GO:0061195;GO:0048471;GO:0030139;GO:0000151;GO:0021521;GO:0002090;GO:0071599;GO:0021519;GO:0048546;GO:0009880;GO:0030318;GO:0045685;GO:0060218;GO:0005813;GO:0001701;GO:0021986;GO:0042803;GO:0001885;GO:0004842;GO:0045665;GO:0001947;GO:0046872;GO:…	_	_	_	_	_	_	K10645	MIB
comp107855_c0_seq1	154	3-467(+)	gi|195121126|ref|XP_002005072.1|	GI20267 [Drosophila mojavensis]	0.6	GO:0009395;GO:0019217;GO:0030514;GO:0007474;GO:0045941;GO:0005737;GO:0006687;GO:0003713;GO:0042594;GO:0005667;GO:0008195;GO:0055088;GO:0035183;GO:0019432	_	_	_	_	_	_	K15728	LPIN
comp108111_c0_seq1	203	3-611(+)	gi|24647502|ref|NP_732165.1|	fasciclin 1, isoform B [Drosophila FAS1_DROME RecName: Full=Fasciclin-1; AltName: Full=Fasciclin I; Short=FAS I; Short=FCN; Flags: Pre	0.61	GO:0016338;GO:0050839;GO:0008038;GO:0007156;GO:0007411;GO:0005886	_	_	_	_	_	_	None	_
comp108139_c0_seq1	157	1-471(-)	gi|498935885|ref|XP_004520248.1|	PREDICTED: flap endonuclease 1-like [Ceratitis capitata]	0.72	GO:0005634;GO:0006974;GO:0006259;GO:0005488;GO:0004518	_	_	_	_	_	_	K04799	FEN1, RAD2
comp1082961_c0_seq1	355	_	gi|328715565|ref|XP_001947927.2|	PREDICTED: epidermal growth factor receptor-like [Acyrthosiphon pisum]	0.77	GO:0016020;GO:0007169;GO:0005524;GO:0006468;GO:0004714	_	_	_	_	_	_	K04361	EGFR, ERBB1
comp1083591_c0_seq1	122	1-369(+)	gi|426256278|ref|XP_004021768.1|	PREDICTED: plasma kallikrein [Ovis aries]	0.71	GO:0007596;GO:0008233	_	_	_	_	_	_	K01324	KLKB1
comp1085803_c0_seq1	522	_	gi|313238771|emb|CBY13791.1|	unnamed protein product [Oikopleura dioica]	0.64	GO:0016020;GO:0005783;GO:0000381;GO:0034620;GO:0000790;GO:0042500;GO:0006465;GO:0007424;GO:0005515;GO:0030532	_	_	_	_	_	_	K09595	HM13
comp108598_c0_seq1	1127	_	gi|15242753|ref|NP_201145.1|	adenylate kinase 1 [Arabidopsis KAD1_ARATH RecName: Full=Adenylate kinase 1; Short=AK 1; AltName: Full=ATP-AMP transphosphorylase 1 9	0.79	GO:0046034;GO:0048046;GO:0005524;GO:0006096;GO:0051788;GO:0004017;GO:0006511;GO:0005507;GO:0005829;GO:0046939;GO:0006144;GO:0009651;GO:0009749;GO:0005739;GO:0005886;GO:0009507;GO:0006169;GO:0005634;GO:0004712;GO:0009506;GO:0007165;GO:0080094;GO:0006094;GO:0009750;GO:0009744;GO:0005774;GO:0080129;GO:0046686;GO:0005794;GO:0019344;GO:0009853;GO:0004001	3702.AT5G63400.1-P	ADK1 (ADENYLATE KINASE 1); ATP binding / adenylate kinase/ nucleobase, nucleoside, nucleotid [...]	0.8057	COG0563	KOG3078	_	K00939	E2.7.4.3, adk
comp1088544_c0_seq1	90	107-376(-)	gi|498953414|ref|XP_004523497.1|	PREDICTED: octopamine receptor beta-3R-like [Ceratitis capitata]	0.75	GO:0007165;GO:0004871	_	_	_	_	_	_	None	_
comp10891_c0_seq1	127	115-498(+)	gi|256089040|ref|XP_002580626.1|	E3 ubiquitin-protein ligase nedd-4 [Schistosoma mansoni]	0.55	GO:0003008;GO:0016567;GO:0016874;GO:0000122;GO:0006511;GO:0005515;GO:0005829;GO:0030512;GO:0017080;GO:0006814;GO:0010038;GO:0042391;GO:0051050;GO:0005654;GO:1901016;GO:0051128;GO:0006367	_	_	_	_	_	_	K13305	NEDD4L
comp109080_c0_seq1	199	2-598(+)	gi|321478559|gb|EFX89516.1|	hypothetical protein DAPPUDRAFT_303260 [Daphnia pulex]	0.8	GO:0048786;GO:0005524;GO:0009069;GO:0006468;GO:0042742;GO:0004674;GO:0048789;GO:0007268	7245.FBpp0267620	GE22610	0.8138	COG0515	KOG1290	_	K08832	SRPK3, STK23
comp109212_c0_seq1	248	307-1050(-)	gi|443688741|gb|ELT91340.1|	hypothetical protein CAPTEDRAFT_201917 [Capitella teleta]	0.58	GO:0015276;GO:0050968;GO:0050960;GO:0050974;GO:0070542;GO:0006811	_	_	_	_	_	_	K04984	TRPA1, ANKTM1
comp1092695_c0_seq1	175	1-525(-)	gi|241100975|ref|XP_002409790.1|	secreted protein, putative [Ixodes scapularis]	0.47	GO:0042802;GO:0008038;GO:0007417;GO:0007411;GO:0043005	_	_	_	_	_	_	None	_
comp109275_c0_seq1	452	_	gi|14423721|sp|Q9NFZ2.1|GBGE_CALVI	RecName: Full=Guanine nucleotide-binding protein subunit gamma-e; Flags: Precursor guanine nucleotide-binding protein gamma subunit [Call	0.81	GO:0007186;GO:0005834;GO:0007601;GO:0004871	7244.FBpp0228889	GJ14472	0.8136	_	KOG4119	_	K04547	GNG13
comp109290_c0_seq1	347	1-1041(-)	gi|170816517|gb|ACB38667.1|	type 1 serotonin receptor [Macrobrachium rosenbergii]	0.85	GO:0007186;GO:0016021;GO:0004930	7159.AAEL008360-PA	5-hydroxytryptamine receptor 2	0.8485	_	KOG3656	_	K04153	HTR1
comp1094322_c0_seq1	211	2-637(+)	gi|321477707|gb|EFX88665.1|	hypothetical protein DAPPUDRAFT_41111 [Daphnia pulex]	0.93	GO:0000165;GO:0005524;GO:0009069;GO:0006468;GO:0007178;GO:0004707	7719.ENSCINP00000002924	similar to MGC99048 protein	0.8636	COG0515	KOG0660	_	K08293	E2.7.11.24
comp109612_c0_seq1	963	_	gi|159477687|ref|XP_001696940.1|	prohibitin [Chlamydomonas prohibitin [Chlamydomonas reinhardtii]	0.79	GO:0016020;GO:0044763;GO:0043231;GO:0042221;GO:0006950;GO:0071944;GO:0044444	3055.JGI58511	prohibitin	0.7903	COG0330	KOG3083	NOG147845	None	_
comp109714_c0_seq1	309	107-1033(-)	gi|195331251|ref|XP_002032316.1|	GM23585 [Drosophila sechellia]	0.51	GO:0008359;GO:0042070;GO:0046982;GO:0007317;GO:0006979;GO:0008340;GO:0060465;GO:0060322;GO:0005667;GO:0045944;GO:0045449;GO:0008103;GO:0003700	_	_	_	_	_	_	K09041	NFE2N, CNC
comp109950_c0_seq1	323	2-970(+)	gi|405964550|gb|EKC30021.1|	Multiple PDZ domain protein [Crassostrea gigas]	0.66	GO:0070830;GO:0005515;GO:0005923;GO:0035556;GO:0005886;GO:0048471	10090.ENSMUSP00000049176	InaD-like (Drosophila) Gene; Scaffolding protein that may bring different proteins into adja [...]	0.873	_	KOG0708	_	K06092	INADL, PATJ
comp1099556_c0_seq1	240	3-725(+)	gi|195110179|ref|XP_001999659.1|	GI24643 [Drosophila mojavensis]	0.82	GO:0005524;GO:0006468;GO:0035556;GO:0006182;GO:0004672;GO:0016021;GO:0006144;GO:0046039;GO:0004383	7222.FBpp0147893	GH13987	0.8207	COG0515	_	_	K12323	ANPRA, NPR1
comp110066_c0_seq1	187	104-664(-)	gi|242013230|ref|XP_002427317.1|	class A rhodopsin-like G-protein coupled receptor GPRmys, putative [Pediculus humanus class A rhodopsin-like G-protein coupled r	0.77	GO:0007186;GO:0016021;GO:0004930	_	_	_	_	_	_	None	_
comp1103391_c0_seq1	118	3-356(-)	gi|195444667|ref|XP_002069972.1|	GK11283 [Drosophila willistoni]	0.69	GO:0007217;GO:0007268;GO:0016021;GO:0004995;GO:0005886;GO:0007187	_	_	_	_	_	_	K04225	TAKR
comp11047_c0_seq1	233	2-703(+)	gi|195020135|ref|XP_001985128.1|	GH14682 [Drosophila grimshawi]	0.53	GO:0042060;GO:0005488;GO:0045087;GO:0007599;GO:0071704	_	_	_	_	_	_	K03900	VWF
comp1110_c0_seq1	178	61-597(+)	gi|391341672|ref|XP_003745151.1|	PREDICTED: probable nuclear hormone receptor HR38-like [Metaseiulus occidentalis]	0.59	GO:0007165;GO:0031326;GO:0080090;GO:0006351;GO:0005488;GO:0071310;GO:0006915;GO:0044424;GO:0048522	_	_	_	_	_	_	K08558	NR4A2, NURR1
comp111261_c0_seq1	295	1-888(+)	gi|383860458|ref|XP_003705706.1|	PREDICTED: flotillin-2-like [Megachile rotundata]	0.92	GO:0035011;GO:0007155;GO:0005198;GO:0016600	7165.AGAP003789-PA	AGAP003789-PA	0.9153	COG2268	KOG2668	_	K07192	FLOT
comp111297_c0_seq1	267	2-802(+)	gi|240989503|ref|XP_002404312.1|	leukocyte tyrosine kinase receptor, putative [Ixodes scapularis]	0.89	GO:0007169;GO:0000187;GO:0005524;GO:0016021;GO:0004714;GO:0048666	_	_	_	_	_	_	K05119	ALK
comp111495_c0_seq1	89	159-425(-)	gi|63079224|gb|AAY29658.1|	ion-transport peptide precursor-like protein [Manduca sexta]	0.66	GO:0007165;GO:0005179	_	_	_	_	_	_	None	_
comp1121805_c0_seq1	131	2-394(+)	gi|115361507|gb|ABI95854.1|	GABA-alpha subunit [Lepeophtheirus salmonis]	0.79	GO:0006821;GO:0005230;GO:0007214;GO:0016021;GO:0030054;GO:0004890;GO:0005886;GO:0045211	_	_	_	_	_	_	K05195	GLRA3
comp112214_c0_seq1	148	2-445(-)	gi|157111973|ref|XP_001651775.1|	rap gtpase-activating protein [Aedes aegypti]	0.68	GO:0002121;GO:0032861;GO:0046582	_	_	_	_	_	_	None	_
comp1123567_c0_seq1	214	3-644(-)	gi|195427293|ref|XP_002061711.1|	GK17142 [Drosophila willistoni]	0.68	GO:0009270;GO:0006811;GO:0005216;GO:0048060;GO:0007605;GO:0045450;GO:0045451;GO:0050974	_	_	_	_	_	_	None	_
comp11286_c0_seq1	848	_	gi|81074820|gb|ABB55376.1|	putative arginine/serine-rich protein-like [Solanum tuberosum]	0.45	GO:1901363;GO:0097159;GO:0005515;GO:0000398;GO:0005730;GO:0016607;GO:0010182	_	_	_	_	_	_	K14325	RNPS1
comp112896_c0_seq1	354	28-1092(+)	gi|290462535|gb|ADD24315.1|	Mitogen-activated protein kinase 14 [Lepeophtheirus salmonis]	0.83	GO:0000165;GO:0005524;GO:0009069;GO:0006468;GO:0007178;GO:0004707	45351.JGI180219	hypothetical protein	0.7914	COG0515	KOG0660	_	K04441	P38
comp1132467_c0_seq1	99	149-445(-)	gi|33304726|gb|AAP34642.1|	small ubiquitin-like modifier [Bigelowiella natans]	0.9	GO:0031386;GO:0005634;GO:0016925;GO:0016462;GO:0009408	29760.GSVIVG00010419001	SubName: Full=Chromosome undetermined scaffold_260, whole genome shotgun sequence;	0.75	COG5227	KOG1769	_	K12160	SUMO, SMT3
comp113273_c0_seq1	283	3-851(-)	gi|195169117|ref|XP_002025374.1|	GL12338 [Drosophila persimilis]	0.9	GO:0007165;GO:0051491;GO:0030036;GO:0050803;GO:0005057;GO:0030676;GO:0005622;GO:0005543;GO:0032314;GO:0045202;GO:0050770	_	_	_	_	_	_	K05731	TIAM
comp11333_c0_seq1	134	2-403(-)	gi|148298728|ref|NP_001091830.1|	nicotinic acetylcholine receptor subunit alpha 6 isoform 3 precursor [Bombyx mori]	0.87	GO:0004889;GO:0007165;GO:0016021;GO:0030054;GO:0006812;GO:0005886;GO:0045211	_	_	_	_	_	_	None	_
comp113414_c0_seq1	116	191-538(-)	gi|91087161|ref|XP_975356.1|	PREDICTED: similar to high-affinity octopamine transporter protein [Tribolium castaneum]	0.47	GO:0016020;GO:0022804;GO:0044464;GO:0048265;GO:0006836;GO:0022891	_	_	_	_	_	_	K05035	SLC6A2
comp113457_c0_seq1	273	2-820(-)	gi|157783824|gb|ABV72683.1|	nicotinic acetylcholine receptor alpha 1 subunit [Bombyx mori]	0.91	GO:0004889;GO:0007165;GO:0016021;GO:0030054;GO:0006812;GO:0005886;GO:0045211	_	_	_	_	_	_	K05312	CHRNN
comp1135122_c0_seq1	413	139-1377(-)	gi|478253616|gb|ENN73923.1|	hypothetical protein YQE_09495, partial [Dendroctonus ponderosae]	0.69	GO:0050794;GO:0044699;GO:0050896	_	_	_	_	_	_	None	_
comp113528_c0_seq1	212	2-637(+)	gi|478537019|ref|XP_004442626.1|	PREDICTED: cAMP-dependent protein kinase catalytic subunit alpha [Ceratotherium simum simum]	0.77	GO:0050794;GO:0016020;GO:0044707;GO:0005737;GO:0071310;GO:0000166;GO:0048518;GO:0051239;GO:0043231;GO:0030154;GO:0006468;GO:0009069;GO:0044767;GO:0004674;GO:0048856;GO:0019899	9823.ENSSSCP00000014641	protein kinase, cAMP-dependent, catalytic, alpha; Mediates cAMP-dependent signaling triggere [...]	0.7727	COG0515	_	_	K04345	PKA
comp113532_c0_seq1	202	1-606(+)	gi|165906130|gb|ABY71758.1|	tyramine/octopamine receptor [Macrobrachium rosenbergii]	0.82	GO:0004989;GO:0016021;GO:0007187	7159.AAEL006844-PA	octopamine receptor oamb	0.8026	_	KOG3656	_	K04153	HTR1
comp113532_c0_seq2	195	1-585(+)	gi|165906130|gb|ABY71758.1|	tyramine/octopamine receptor [Macrobrachium rosenbergii]	0.82	GO:0004989;GO:0016021;GO:0007187	7159.AAEL006844-PA	octopamine receptor oamb	0.8026	_	KOG3656	_	K04153	HTR1
comp1139814_c0_seq1	139	3-419(-)	gi|195398609|ref|XP_002057913.1|	GJ15793 [Drosophila virilis]	0.56	GO:0016327;GO:0005921;GO:0016324;GO:0005243;GO:0007267;GO:0030727;GO:0007440;GO:0016331;GO:0042048;GO:0010496	_	_	_	_	_	_	None	_
comp11436_c0_seq1	165	74-571(+)	gi|224510615|pdb|3DBU|A	Chain A, Use Of Carbonic Anhydrase Ii, Ix Active-Site Mimic, For The Purpose Of Screening Inhibitors For Possible Anti-Cancer Properties A Chain A, Use O	0.67	GO:0048513;GO:0044767;GO:0044281;GO:0015701;GO:0005829;GO:0008270;GO:0050896;GO:0009987;GO:0048518;GO:0045177	_	_	_	_	_	_	K01672	E4.2.1.1
comp114414_c0_seq1	1660	_	gi|356508388|ref|XP_003522939.1|	PREDICTED: uncharacterized protein LOC100806292 [Glycine max]	0.54	GO:0044260;GO:0044424;GO:0044238;GO:0050896;GO:0003676	_	_	_	_	_	_	None	_
comp114477_c0_seq1	754	_	gi|387914198|gb|AFK10708.1|	Ras-related protein ORAB-1 [Callorhinchus milii]	0.85	GO:0016020;GO:0007264;GO:0005794;GO:0005739;GO:0005525;GO:0015031	10116.ENSRNOP00000004991	Ras-related protein Rab-1B	0.8883	COG1100	KOG0084	NOG286713	K07875	RAB1B
comp1152924_c0_seq1	119	1-360(+)	gi|405966739|gb|EKC31982.1|	Pantetheinase [Crassostrea gigas]	0.68	GO:0044763;GO:0006807;GO:0016810;GO:0006954	_	_	_	_	_	_	K08069	VNN
comp115302_c0_seq1	266	2-799(-)	gi|14028711|gb|AAK52473.1|AF336364_1	allatostatin receptor [Periplaneta americana]	0.66	GO:0016020;GO:0007165;GO:0004888;GO:0050896;GO:0042923;GO:0042562	_	_	_	_	_	_	K04233	GALRN, AR
comp1155777_c0_seq1	126	1-378(-)	gi|198475573|ref|XP_002132955.1|	GA26108 [Drosophila pseudoobscura pseudoobscura]	0.78	GO:0042023;GO:0001077;GO:0019730;GO:0040005;GO:0060537;GO:0000122;GO:0000083;GO:0007113;GO:0043565;GO:0035206;GO:0008630;GO:0031523;GO:0005201;GO:0007475;GO:0008362;GO:0046331;GO:0008069;GO:0045850;GO:0030414;GO:0048813;GO:0005578;GO:0035189;GO:0007424;GO:0007307;GO:0045944;GO:0051726;GO:0040007;GO:0008134;GO:0008284	_	_	_	_	_	_	None	_
comp1158518_c0_seq1	125	47-424(+)	gi|312372927|gb|EFR20779.1|	hypothetical protein AND_19470 [Anopheles darlingi]	0.81	GO:0050911;GO:0016021;GO:0004984;GO:0007187;GO:0004930	_	_	_	_	_	_	None	_
comp1167166_c0_seq1	265	1-798(+)	gi|241084164|ref|XP_002409086.1|	phospholipase C, putative [Ixodes scapularis]	0.85	GO:0009395;GO:0004435;GO:0005509;GO:0007242;GO:0004871;GO:0035556;GO:0046339	7070.D1ZZE1	similar to phospholipase c beta	0.8333	_	KOG1265	_	K05858	PLCB
comp116789_c0_seq1	127	3-383(+)	gi|326924153|ref|XP_003208296.1|	PREDICTED: opsin-VA-like [Meleagris gallopavo]	0.61	GO:0044699;GO:0050896;GO:0009987	_	_	_	_	_	_	K04256	OPN3
comp1168041_c0_seq1	127	2-382(-)	gi|357618650|gb|EHJ71546.1|	hypothetical protein KGM_01612 [Danaus plexippus]	0.72	GO:0050896	_	_	_	_	_	_	None	_
comp1168588_c0_seq1	541	_	gi|328776371|ref|XP_003249152.1|	PREDICTED: octopamine receptor beta-3R-like [Apis mellifera]	0.78	GO:0007165;GO:0004871	7460.XP_001123298	similar to 5-hydroxytryptamine 1A receptor (5-HT-1A) (Serotonin receptor 1A) (5-HT1A)	0.8046	_	KOG3656	_	None	_
comp1169429_c0_seq1	127	3-383(-)	gi|321465734|gb|EFX76733.1|	hypothetical protein DAPPUDRAFT_321920 [Daphnia pulex]	0.92	GO:0007165;GO:0008158;GO:0016021;GO:0030301	_	_	_	_	_	_	K12385	NPC1
comp1170535_c0_seq1	226	3-683(+)	gi|340729306|ref|XP_003402945.1|	PREDICTED: steroid receptor seven-up, isoforms B/C-like [Bombus terrestris]	0.85	GO:0003707;GO:0030522;GO:0005634;GO:0006355;GO:0043565;GO:0008270;GO:0043401;GO:0004879	7460.XP_392402	seven up	0.8515	_	KOG3575	_	K14032	NR2F3, svp
comp1170746_c0_seq1	672	_	gi|89269062|emb|CAJ81677.1|	proteasome (prosome, macropain) 26S subunit, non-ATPase, 1 [Xenopus (Silurana) tropicalis]	0.79	GO:0006521;GO:0005838;GO:0051437;GO:0005829;GO:0000216;GO:0000209;GO:0005654;GO:0030234;GO:0016032;GO:0000084;GO:0010467;GO:0051436;GO:0042176;GO:0002479;GO:0031145;GO:0016071;GO:0006977;GO:0042981	_	_	_	_	_	_	K03032	PSMD1, RPN2
comp1173250_c0_seq1	217	1-651(-)	gi|47208784|emb|CAF93049.1|	unnamed protein product [Tetraodon nigroviridis]	0.5	GO:0060973;GO:0030182;GO:0014032;GO:0060059;GO:0007417;GO:0010842;GO:0031101;GO:0001947;GO:0060038;GO:0000185;GO:0021634;GO:0048596	_	_	_	_	_	_	K11647	SMARCA2_4
comp1173854_c0_seq1	372	_	gi|307188426|gb|EFN73183.1|	Probable nuclear hormone receptor HR38 [Camponotus floridanus]	0.76	GO:0003707;GO:0030522;GO:0005634;GO:0006355;GO:0043565;GO:0008270;GO:0043401;GO:0004879	_	_	_	_	_	_	K08558	NR4A2, NURR1
comp117408_c0_seq1	867	_	gi|115629185|ref|XP_797515.2|	PREDICTED: cysteine string protein-like [Strongylocentrotus purpuratus]	0.65	GO:0044260;GO:0020011;GO:0046872;GO:0005515;GO:0044238;GO:0006950	_	_	_	_	_	_	K09525	DNAJC5
comp117433_c0_seq1	284	1-855(+)	gi|514059565|ref|YP_008123646.1|	large adhesin [Haemophilus parasuis ZJ0906]	0.53	GO:0031012;GO:0044421;GO:0051716;GO:0050789;GO:0044767;GO:0048731;GO:0005515;GO:0030198;GO:0010033	_	_	_	_	_	_	K06236	COL1AS
comp1175450_c0_seq1	395	_	gi|449672516|ref|XP_002161972.2|	PREDICTED: neutral alpha-glucosidase AB [Hydra magnipapillata]	0.83	GO:0005783;GO:0009826;GO:0042742;GO:0015926;GO:0046686;GO:0030246;GO:0030244;GO:0009507	_	_	_	_	_	_	K05546	GANAB
comp1178414_c0_seq1	214	3-644(-)	gi|321461418|gb|EFX72450.1|	hypothetical protein DAPPUDRAFT_326185 [Daphnia pulex]	0.8	GO:0009395;GO:0004143;GO:0007205;GO:0046486;GO:0005509;GO:0035556	7227.FBpp0111492	CG34361 gene product from transcript CG34361-RE (EC:2.7.1.107); Upon cell stimulation conver [...]	0.8276	_	KOG1169;KOG0696	_	K00901	E2.7.1.107, DGK, dgkA
comp1179519_c0_seq1	247	3-743(-)	gi|270013391|gb|EFA09839.1|	hypothetical protein TcasGA2_TC011986 [Tribolium castaneum]	0.71	GO:0042023;GO:0001077;GO:0019730;GO:0040005;GO:0060537;GO:0000122;GO:0005576;GO:0007113;GO:0043565;GO:0031012;GO:0035206;GO:0008630;GO:0031523;GO:0007475;GO:0008362;GO:0046331;GO:0008069;GO:0045850;GO:0048813;GO:0035189;GO:0007424;GO:0007307;GO:0045944;GO:0000082;GO:0051726;GO:0008134	_	_	_	_	_	_	None	_
comp11798_c0_seq1	358	_	gi|388496190|gb|AFK36161.1|	unknown [Lotus japonicus]	0.78	GO:0005986;GO:0006096;GO:0006013;GO:0005829;GO:0042132;GO:0016491;GO:0005634;GO:0006000;GO:0006094;GO:0009750;GO:0009737;GO:0015976;GO:0046872;GO:0006098;GO:0005983;GO:0015979;GO:0030388	_	_	_	_	_	_	K03841	FBP, fbp
comp1182210_c0_seq1	121	3-365(+)	gi|321478646|gb|EFX89603.1|	hypothetical protein DAPPUDRAFT_95014 [Daphnia pulex]	0.73	GO:0043087;GO:0005622;GO:0035023;GO:0005543;GO:0005089	_	_	_	_	_	_	None	_
comp118432_c0_seq1	464	2-1396(+)	gi|307193494|gb|EFN76271.1|	Fibroblast growth factor receptor-like protein 1 [Harpegnathos saltator]	0.82	GO:0005007;GO:0005524;GO:0016021;GO:0006468;GO:0008543;GO:0008284	7460.XP_396649	heartless	0.8343	COG0515	KOG0200	_	None	_
comp1188294_c0_seq1	177	1-531(-)	gi|449681053|ref|XP_002157700.2|	PREDICTED: ankyrin-2-like [Hydra magnipapillata]	0.56	GO:0044763;GO:0009605;GO:0050877;GO:0044708;GO:0009408;GO:0044765	_	_	_	_	_	_	K04984	TRPA1, ANKTM1
comp1189983_c0_seq1	158	65-538(-)	gi|261278854|pdb|3JWQ|A	Chain A, Crystal Structure Of Chimeric Pde5/pde6 Catalytic Domain Complexed With Sildenafil B Chain B, Crystal Structure Of Chimeric Pde5/pde6 Catalytic	0.62	GO:0050794;GO:0044763;GO:0007596;GO:0004112;GO:0005829;GO:0046069;GO:0030553	_	_	_	_	_	_	K13763	PDE6N
comp1191376_c0_seq1	232	1-696(-)	gi|37612|emb|CAA39792.1|	urf-ret [Homo sapiens]	0.59	GO:0010008;GO:0016310;GO:0030335;GO:0004713;GO:0072001;GO:0005515;GO:0005887;GO:0000166;GO:0033619;GO:0007158;GO:0048513;GO:0004872;GO:0010976;GO:0071300;GO:0044260;GO:2001241;GO:0005509;GO:0033630	_	_	_	_	_	_	K05126	RET
comp1194024_c0_seq1	442	_	gi|505848303|ref|XP_004617609.1|	PREDICTED: pro-cathepsin H [Sorex araneus]	0.53	GO:0050794;GO:0044707;GO:0044767;GO:0044763;GO:0070011;GO:0043170;GO:0050896;GO:0048518;GO:0044444	_	_	_	_	_	_	K01366	CTSH
comp1195541_c0_seq1	688	_	gi|488925630|ref|WP_002836705.1|	pyruvate kinase [Finegoldia pyruvate kinase [Finegoldia magna ATCC 53516]	0.63	GO:0046686;GO:0005829;GO:0016301;GO:0044237;GO:0005886	_	_	_	_	_	_	K00873	PK, pyk
comp11978_c0_seq1	749	_	gi|443734923|gb|ELU18779.1|	hypothetical protein CAPTEDRAFT_166096 [Capitella teleta]	0.84	GO:0045777;GO:0006069;GO:0032496;GO:0015947;GO:0003016;GO:0000166;GO:0008270;GO:0006068;GO:0005739;GO:0051903;GO:0005634;GO:0000051;GO:0051409;GO:0018467;GO:0042803;GO:0007568;GO:0018119;GO:0051775;GO:0004022;GO:0001523;GO:0046294;GO:0005504	10116.ENSRNOP00000031961	Alcohol dehydrogenase class-3 (EC 1.1.1.1)(Alcohol dehydrogenase class-III)(Alcohol dehydrog [...]	0.8287	COG1062	KOG0022	_	K00121	frmA, ADH5, adhC
comp1198401_c0_seq1	147	1-444(+)	gi|270014230|gb|EFA10678.1|	hypothetical protein TcasGA2_TC011639 [Tribolium castaneum]	0.75	GO:0004935;GO:0016021;GO:0071875;GO:0005886;GO:0007187	_	_	_	_	_	_	K04165	Oamb
comp119900_c0_seq1	239	1-717(-)	gi|225710090|gb|ACO10891.1|	Broad-complex core protein isoform 6 [Caligus rogercresseyi]	0.53	GO:0007426;GO:0048750;GO:0035147;GO:0035001;GO:0046843;GO:0035151;GO:0005700;GO:0031987;GO:0000122;GO:0017053;GO:0002121;GO:0003682;GO:0007298;GO:0045467;GO:0001709;GO:0040003;GO:0001964;GO:0000978;GO:0000785;GO:0048854;GO:0042803;GO:0001078;GO:0048813;GO:0007476;GO:0048053;GO:0016476;GO:0045944;GO:0042675;GO:0007422;GO:0000980	_	_	_	_	_	_	K09237	K09237
comp120146_c0_seq1	123	1-372(+)	gi|301617229|ref|XP_002938053.1|	PREDICTED: 1-phosphatidylinositol 4,5-bisphosphate phosphodiesterase delta-1 isoform X1 [Xenopus (Silurana) tropicalis]	0.79	GO:0009395;GO:0004435;GO:0005509;GO:0007242;GO:0004871;GO:0035556;GO:0046339;GO:0005543	_	_	_	_	_	_	K05857	PLCD
comp1203310_c0_seq1	201	199-804(+)	gi|54020847|ref|NP_001005669.1|	frizzled family receptor 10 precursor [Xenopus (Silurana) tropicalis]	0.64	GO:0016020;GO:0048513;GO:0044464;GO:0080090;GO:0044767;GO:0050790;GO:0005515;GO:0019220;GO:0004888;GO:0016055;GO:0009966;GO:0071704	_	_	_	_	_	_	K02842	FZD9_10
comp120888_c0_seq1	506	146-1663(+)	gi|300681026|sp|A8X6H4.3|CMK1_CAEBR	RecName: Full=Calcium/calmodulin-dependent protein kinase type 1; AltName: Full=CaM kinase I; Short=CaM-KI	0.69	GO:0040040;GO:0005954;GO:0005634;GO:0009069;GO:0045664;GO:0005737;GO:0046777;GO:0048812;GO:0032793;GO:0004683;GO:0045944;GO:0005516	_	_	_	_	_	_	K08794	CAMK1
comp120905_c0_seq1	152	55-513(+)	gi|189235846|ref|XP_968998.2|	PREDICTED: similar to leukocyte receptor tyrosine protein kinase [Tribolium castaneum]	0.93	GO:0007169;GO:0000187;GO:0005524;GO:0016021;GO:0004714;GO:0048666	7070.XP_968998	similar to leukocyte receptor tyrosine protein kinase	0.9455	COG0515	_	_	K05119	ALK
comp120905_c0_seq2	274	1-825(+)	gi|189235846|ref|XP_968998.2|	PREDICTED: similar to leukocyte receptor tyrosine protein kinase [Tribolium castaneum]	0.9	GO:0007169;GO:0005524;GO:0016021;GO:0006468;GO:0004714	7070.XP_968998	similar to leukocyte receptor tyrosine protein kinase	0.912	COG0515	_	_	K05119	ALK
comp1210404_c0_seq1	194	1-582(-)	gi|322793132|gb|EFZ16826.1|	hypothetical protein SINV_08919 [Solenopsis invicta]	0.62	GO:0007165;GO:0016740;GO:0004871	_	_	_	_	_	_	None	_
comp1210756_c0_seq1	790	_	gi|470530827|ref|XP_004368317.1|	histone deacetylase 1, putative [Acanthamoeba castellanii str. Neff]	0.89	GO:0060044;GO:0006344;GO:0045786;GO:0006338;GO:0007596;GO:0016358;GO:0045347;GO:0021766;GO:0048011;GO:0031490;GO:0051896;GO:0048714;GO:0032041;GO:0043433;GO:0090311;GO:0061198;GO:0032967;GO:0005737;GO:0060789;GO:0060297;GO:0090090;GO:0046969;GO:0000792;GO:0003700;GO:0001047;GO:0009913;GO:0097372;GO:0045862;GO:0016580;GO:0070933;GO:0043066;GO:0046970;GO:0042475;GO:0016581;GO:0045944;GO:0045449;GO:…	9031.ENSGALP00000024133	Histone deacetylase 2 (HD2)(EC 3.5.1.98); Responsible for the deacetylation of lysine residu [...]	0.8803	COG0123	KOG1342	_	K06067	HDAC1_2
comp1211136_c0_seq1	270	3-812(-)	gi|345479003|ref|XP_001606987.2|	PREDICTED: hypothetical protein LOC100123358 [Nasonia vitripennis]	0.9	GO:0007615;GO:0048790;GO:0031594;GO:0008344;GO:0006816;GO:0007274;GO:0048788;GO:0007269;GO:0048789;GO:0042734;GO:0005262;GO:0007614;GO:0048167	7159.AAEL008265-PA	rab6-interacting protein 2/elks/erc/cast	0.8721	_	KOG4809	_	None	_
comp12126_c0_seq1	212	3-638(-)	gi|33089868|gb|AAP93817.1|	octopamine receptor [Periplaneta americana]	0.8	GO:0004935;GO:0016021;GO:0071875;GO:0005886;GO:0007187	_	_	_	_	_	_	K04165	Oamb
comp121484_c0_seq1	126	1-381(+)	gi|383865939|ref|XP_003708429.1|	PREDICTED: glutamate receptor, ionotropic kainate 2-like [Megachile rotundata]	0.94	GO:0030054;GO:0006811;GO:0035235;GO:0005234;GO:0004970;GO:0016021;GO:0007268;GO:0030288;GO:0005886;GO:0045211	_	_	_	_	_	_	None	_
comp1215225_c0_seq1	693	_	gi|357506163|ref|XP_003623370.1|	Proteasome subunit alpha type [Medicago truncatula]	0.82	GO:0005634;GO:0019773;GO:0004298;GO:0003676;GO:0005773;GO:0046686;GO:0006511;GO:0022626	3218.JGI190437	hypothetical protein; The proteasome is a multicatalytic proteinase complex which is charact [...]	0.8433	COG0638	KOG0178	_	K02728	PSMA4
comp121617_c0_seq1	193	3-581(-)	gi|321459242|gb|EFX70297.1|	hypothetical protein DAPPUDRAFT_61463 [Daphnia pulex]	0.66	GO:0016020;GO:0016310;GO:0004713;GO:0007169;GO:0004871;GO:0005488	_	_	_	_	_	_	K04362	FGFR1
comp1216488_c0_seq1	368	_	gi|505843721|ref|XP_004615357.1|	PREDICTED: sequestosome-1 [Sorex araneus]	0.78	GO:0005080;GO:0043130;GO:0008270;GO:0042169;GO:0043122	_	_	_	_	_	_	K14381	SQSTM1
comp122098_c0_seq1	146	2-442(+)	gi|189527122|ref|XP_689836.3|	PREDICTED: mitogen-activated protein kinase kinase kinase 4 [Danio rerio]	0.63	GO:0010468;GO:0060718;GO:0001890;GO:0005737;GO:0043507;GO:0019100;GO:0005515;GO:0004672	_	_	_	_	_	_	K04428	MAP3K4, MEKK4
comp122141_c0_seq1	181	2-544(-)	gi|157107508|ref|XP_001649813.1|	toll [Aedes aegypti]	0.53	GO:0050896	_	_	_	_	_	_	None	_
comp122169_c0_seq1	732	_	gi|157130668|ref|XP_001661955.1|	cytohesin 1, 2, 3, 4 (guanine nucleotide-exchange protein) [Aedes aegypti]	0.79	GO:0043087;GO:0032012;GO:0005086;GO:0005543	_	_	_	_	_	_	None	_
comp1227539_c0_seq1	132	3-401(+)	gi|195332544|ref|XP_002032957.1|	GM21055 [Drosophila sechellia]	0.58	GO:0005783;GO:0005811;GO:0010890;GO:0007268;GO:0035282;GO:0007411	_	_	_	_	_	_	K01897	ACSL, fadD
comp1229699_c0_seq1	211	3-635(-)	gi|242020086|ref|XP_002430487.1|	Class A Rhodopsin-like G-Protein Coupled Receptor, GPRmac1 [Pediculus humanus corporis]	0.87	GO:0016907;GO:0007213;GO:0004715;GO:0007268;GO:0016021;GO:0007187	_	_	_	_	_	_	K04131	CHRM3
comp123092_c0_seq1	388	65-1228(+)	gi|47086551|ref|NP_997912.1|	casein kinase I isoform epsilon [Danio rerio]	0.79	GO:0005634;GO:0005524;GO:0030178;GO:0009069;GO:0006468;GO:0032436;GO:0090263;GO:0004674;GO:0030529;GO:0034613	7955.ENSDARP00000066390	casein kinase 1 epsilon	0.9263	COG0515	KOG1164	_	K08960	CSNK1E
comp1231612_c0_seq1	172	3-518(-)	gi|189235882|ref|XP_970848.2|	PREDICTED: similar to dual oxidase 1 [Tribolium castaneum]	0.74	GO:0016020;GO:0042335;GO:0051591;GO:0019221;GO:0005488;GO:0016491	_	_	_	_	_	_	K13411	DUOX, THOX
comp123433_c0_seq1	589	_	gi|358337050|dbj|GAA33294.2|	zinc finger protein 581, partial [Clonorchis sinensis]	0.65	GO:0045665;GO:0005634;GO:0046872;GO:0044323;GO:0048387;GO:0006351	_	_	_	_	_	_	None	_
comp1236237_c0_seq1	124	1-375(+)	gi|1769895|emb|CAA65416.1|	CaLB protein [Arabidopsis thaliana]	0.66	GO:0045892;GO:0005783;GO:0031965;GO:0009414;GO:0009958;GO:0008289;GO:0009651;GO:0043565;GO:0005886	_	_	_	_	_	_	None	_
comp123672_c0_seq1	320	2-964(+)	gi|328711396|ref|XP_001945524.2|	PREDICTED: glutamate receptor, ionotropic kainate 4-like [Acyrthosiphon pisum]	0.9	GO:0030054;GO:0006811;GO:0035235;GO:0005234;GO:0004970;GO:0016021;GO:0007268;GO:0030288;GO:0005886;GO:0045211	_	_	_	_	_	_	K05313	GRIN
comp123987_c0_seq1	96	141-431(+)	gi|223947771|gb|ACN27969.1|	unknown [Zea mays]	0.54	GO:0044424;GO:0006950	_	_	_	_	_	_	K04079	htpG, HSP90A
comp123987_c0_seq2	96	127-417(+)	gi|223947771|gb|ACN27969.1|	unknown [Zea mays]	0.54	GO:0044424;GO:0006950	_	_	_	_	_	_	K04079	htpG, HSP90A
comp124535_c0_seq1	433	_	gi|347964658|ref|XP_316836.5|	AGAP000865-PA [Anopheles gambiae str. PEST]	0.83	GO:0005622;GO:0035023;GO:0043547;GO:0005096;GO:0005543;GO:0005089	_	_	_	_	_	_	None	_
comp12520_c0_seq1	152	3-458(-)	gi|47551289|ref|NP_999827.1|	polycystic kidney disease protein 2 [Strongylocentrotus purpuratus]	0.66	GO:0033040;GO:0005783;GO:0001581;GO:0034220;GO:0042802;GO:0008092;GO:0006812;GO:0005261;GO:0071468;GO:0009986;GO:0005509;GO:0005886	_	_	_	_	_	_	K04986	PKD2
comp125338_c0_seq1	162	1-486(+)	gi|512928431|ref|XP_004906183.1|	PREDICTED: nucleoside diphosphate kinase B-like isoform X2 [Heterocephalus glaber]	0.78	GO:0045298;GO:0016020;GO:0035690;GO:0006308;GO:0006165;GO:0021766;GO:0002762;GO:0015949;GO:0019901;GO:0043015;GO:0003697;GO:0008285;GO:0014075;GO:0006241;GO:0042802;GO:0019215;GO:0048471;GO:0071333;GO:0000977;GO:0005525;GO:0006183;GO:0000287;GO:0005524;GO:0004536;GO:0010629;GO:0004550;GO:0071398;GO:0033574;GO:0005829;GO:0006144;GO:0006897;GO:0006206;GO:0043388;GO:0005634;GO:0051591;GO:0005813;GO:…	7244.FBpp0238536	GJ24119	0.8013	COG0105	KOG0888	_	K00940	E2.7.4.6, ndk
comp1255594_c0_seq1	161	2-487(+)	gi|383850888|ref|XP_003701006.1|	PREDICTED: contactin-like [Megachile rotundata]	0.84	GO:0016020;GO:0030246;GO:0004896;GO:0019221	_	_	_	_	_	_	None	_
comp125614_c0_seq1	1200	_	gi|325181178|emb|CCA15592.1|	PRP8 premRNA processing factor 8 homolog (S. cerevisiae) putative [Albugo laibachii Nc14]	0.94	GO:0005524;GO:0000398;GO:0005681;GO:0006298;GO:0030983	_	_	_	_	_	_	K12856	PRPF8, PRP8
comp12569_c0_seq1	359	_	gi|290462209|gb|ADD24152.1|	Neuronal calcium sensor 2 [Lepeophtheirus salmonis]	0.74	GO:0030425;GO:0007602;GO:0051924;GO:0005509;GO:0007601	_	_	_	_	_	_	K13764	RCVRN
comp12591_c0_seq1	188	3-566(-)	gi|28974300|gb|AAO61416.1|	COUP-TF [Branchiostoma floridae]	0.65	GO:0003707;GO:0007510;GO:0006355;GO:0046982;GO:0007503;GO:0005737;GO:0007465;GO:0061331;GO:0042331;GO:0043565;GO:0008270;GO:0001700;GO:0007270;GO:0005634;GO:0007464;GO:0042803;GO:0004879;GO:0001078;GO:0030522;GO:0007419;GO:0007462;GO:0043401	_	_	_	_	_	_	K14032	NR2F3, svp
comp126088_c0_seq1	172	1-516(-)	gi|405958017|gb|EKC24186.1|	Peroxisomal acyl-coenzyme A oxidase 3 [Crassostrea gigas]	0.76	GO:0007165;GO:0016402;GO:0033540;GO:0050660;GO:0005102;GO:0005777;GO:0005504;GO:0005739;GO:0006637	_	_	_	_	_	_	K00232	E1.3.3.6, ACOX1, ACOX3
comp12614_c0_seq1	160	2-484(+)	gi|478262413|gb|ENN81084.1|	hypothetical protein YQE_02452, partial [Dendroctonus ponderosae]	0.82	GO:0003707;GO:0005524;GO:0006355;GO:0009069;GO:0006468;GO:0004674;GO:0005667;GO:0008270;GO:0043565;GO:0043401;GO:0045449;GO:0003700	7460.XP_392769	hormone receptor-like in 78	0.8889	_	KOG3575	_	K14031	NR2CN
comp126209_c0_seq1	131	89-481(-)	gi|321470631|gb|EFX81606.1|	hypothetical protein DAPPUDRAFT_224067 [Daphnia pulex]	0.77	GO:0006804;GO:0006979;GO:0020037;GO:0004601;GO:0055114	_	_	_	_	_	_	None	_
comp1264151_c0_seq1	906	_	gi|195565737|ref|XP_002106455.1|	GD16120 [Drosophila simulans]	0.88	GO:0004889;GO:0007165;GO:0016021;GO:0030054;GO:0006812;GO:0005886;GO:0045211	7176.CPIJ015338-PA	acetylcholine receptor protein alpha 1, 2, 3, 4	0.9213	_	KOG3645	_	K05312	CHRNN
comp1264465_c0_seq1	150	2-451(-)	gi|195122156|ref|XP_002005578.1|	GI20544 [Drosophila mojavensis]	0.69	GO:0005244;GO:0005622;GO:0014059;GO:0045938;GO:0017071;GO:0007637;GO:0008340;GO:0045475;GO:0005221;GO:0005886	_	_	_	_	_	_	None	_
comp12645_c0_seq1	148	2-448(+)	gi|195384617|ref|XP_002051011.1|	GJ22459 [Drosophila virilis]	0.77	GO:0006182;GO:0007165;GO:0004872;GO:0006144;GO:0046039;GO:0004383	_	_	_	_	_	_	None	_
comp1264_c0_seq1	146	3-440(-)	gi|443723531|gb|ELU11908.1|	hypothetical protein CAPTEDRAFT_102936, partial [Capitella teleta]	0.74	GO:0007165;GO:0008081;GO:0001568;GO:0005488	_	_	_	_	_	_	K05857	PLCD
comp126606_c0_seq1	155	283-747(-)	gi|351711969|gb|EHB14888.1|	cAMP-specific 3',5'-cyclic phosphodiesterase 4D [Heterocephalus glaber]	0.63	GO:0007165;GO:0030593;GO:0043232;GO:0004112;GO:0071222;GO:0006939;GO:0005737;GO:0035264;GO:0007568;GO:0006198;GO:0005515	_	_	_	_	_	_	K01120	E3.1.4.17, PDE
comp1266433_c0_seq1	380	_	gi|316997023|dbj|BAJ52639.1|	G protein alpha subunit [Monosiga ovata]	0.66	GO:0007186;GO:0016787;GO:0005515;GO:0000166;GO:0031234	_	_	_	_	_	_	K04640	GNA
comp1266904_c0_seq1	141	2-424(-)	gi|195447280|ref|XP_002071143.1|	GK25636 [Drosophila willistoni]	0.57	GO:0016327;GO:0005921;GO:0016324;GO:0005243;GO:0007267;GO:0030727;GO:0007440;GO:0016331;GO:0042048;GO:0010496	_	_	_	_	_	_	None	_
comp1271070_c0_seq1	178	2-535(-)	gi|383864193|ref|XP_003707564.1|	PREDICTED: GTP-binding protein Di-Ras2-like isoform 1 [Megachile rotundata]	0.68	GO:0007165;GO:0000166	_	_	_	_	_	_	None	_
comp1278666_c0_seq1	165	1-495(-)	gi|386783729|gb|AFJ24759.1|	disintegrin and metalloproteinase domain containing protein-2 [Schmidtea mediterranea]	0.74	GO:0006508;GO:0008237;GO:0007166	_	_	_	_	_	_	K06704	ADAM10
comp1282102_c0_seq1	152	1-456(-)	gi|307181865|gb|EFN69305.1|	Tachykinin-like peptides receptor 99D [Camponotus floridanus]	0.79	GO:0007217;GO:0007268;GO:0016021;GO:0007218;GO:0004995;GO:0005886;GO:0007187	_	_	_	_	_	_	K04225	TAKR
comp128320_c0_seq1	226	3-680(+)	gi|295684930|gb|ADG27752.1|	CAPA receptor variant A [Rhodnius prolixus]	0.64	GO:0007165;GO:0004871	_	_	_	_	_	_	None	_
comp128412_c0_seq1	219	2-661(+)	gi|326429663|gb|EGD75233.1|	ras-1 [Salpingoeca sp. ATCC 50818]	0.73	GO:0007165;GO:0000166	_	_	_	_	_	_	None	_
comp1293099_c0_seq1	407	_	gi|167521357|ref|XP_001745017.1|	hypothetical protein [Monosiga brevicollis MX1]	0.81	GO:0005507;GO:0005739;GO:0042744;GO:0019288;GO:0055114;GO:0016491	_	_	_	_	_	_	None	_
comp12932_c0_seq1	362	1-1089(+)	gi|189234316|ref|XP_972412.2|	PREDICTED: similar to AGAP000519-PA [Tribolium castaneum]	0.76	GO:0007165;GO:0016301	_	_	_	_	_	_	K00901	E2.7.1.107, DGK, dgkA
comp1294784_c0_seq1	125	1-375(-)	gi|391336533|ref|XP_003742634.1|	PREDICTED: neuropeptides capa receptor-like [Metaseiulus occidentalis]	0.69	GO:0007186;GO:0016740;GO:0004930	_	_	_	_	_	_	None	_
comp129730_c0_seq1	154	1-465(+)	gi|328787878|ref|XP_395788.4|	PREDICTED: ankyrin-3 [Apis mellifera]	0.76	GO:0050839;GO:0016358;GO:0040017;GO:0033563;GO:0040010;GO:0007126;GO:0010171;GO:0040018;GO:0016328	_	_	_	_	_	_	K10380	ANK
comp12974_c0_seq1	293	1-882(+)	gi|242017171|ref|XP_002429065.1|	myosin, putative [Pediculus humanus corporis]	0.82	GO:0007165;GO:0005524;GO:0003774;GO:0016459	7260.FBpp0240288	GK11145	0.775	COG5022	KOG4229	_	None	_
comp129907_c0_seq1	142	3-428(-)	gi|498986902|ref|XP_004530972.1|	PREDICTED: calcium-activated potassium channel slowpoke-like isoform X3 [Ceratitis capitata]	0.62	GO:0016020;GO:0042493;GO:0006813;GO:0005515;GO:0015269;GO:0048512;GO:0043025;GO:0045433;GO:0043005	_	_	_	_	_	_	K04936	KCNMA1
comp129916_c0_seq1	119	1-357(-)	gi|325297146|ref|NP_001191582.1|	cAMP-dependent protein kinase regulatory subunit [Aplysia californica]	0.79	GO:0045859;GO:0030552;GO:0007165;GO:0008603;GO:0005952	_	_	_	_	_	_	K04739	PRKAR
comp130897_c0_seq1	145	2-439(+)	gi|195153799|ref|XP_002017811.1|	GL17376 [Drosophila persimilis]	0.82	GO:0009395;GO:0019217;GO:0030514;GO:0003755;GO:0007474;GO:0045941;GO:0005737;GO:0006687;GO:0003713;GO:0042594;GO:0005667;GO:0000413;GO:0008195;GO:0055088;GO:0035183;GO:0019432	_	_	_	_	_	_	K15728	LPIN
comp131024_c0_seq1	235	3-707(-)	gi|116007592|ref|NP_001036492.1|	down syndrome cell adhesion molecule, isoform AR [Drosophila melanogaster]	0.73	GO:0007413;GO:0030425;GO:0030424;GO:0048846;GO:0051635;GO:0007165;GO:0008046;GO:0042803;GO:0043025;GO:0016319;GO:0005887;GO:0070593;GO:0007422;GO:0021551;GO:0006909	_	_	_	_	_	_	None	_
comp131277_c0_seq1	321	1-966(+)	gi|260822663|ref|XP_002606721.1|	hypothetical protein BRAFLDRAFT_82362 [Branchiostoma floridae]	0.47	GO:0005622;GO:0009968;GO:0080090;GO:0006351;GO:0060255;GO:0005488;GO:0007243;GO:0044092;GO:0031323;GO:0019221	_	_	_	_	_	_	None	_
comp1316150_c0_seq1	135	3-407(-)	gi|470326723|ref|XP_004364772.1|	phospholipase C-gamma-1 [Capsaspora owczarzaki ATCC 30864]	0.59	GO:0007596;GO:0048011;GO:0010634;GO:0008180;GO:0005829;GO:0007173;GO:0007242;GO:0008543;GO:0045766;GO:0005886;GO:0007411;GO:0000186;GO:0009395;GO:0005057;GO:0004435;GO:0050852;GO:0050900;GO:0071364;GO:0030027;GO:0001726;GO:0005168;GO:0007202;GO:0019221;GO:0046339;GO:0043536	_	_	_	_	_	_	K05859	PLCG
comp132206_c0_seq1	1349	_	gi|224127642|ref|XP_002329328.1|	predicted protein [Populus predicted protein [Populus trichocarpa]	0.8	GO:0016020;GO:0006457;GO:0046686;GO:0005524;GO:0051082;GO:0010043;GO:0005737	3694.estExt_fgenesh4_pg.C_1230069	SubName: Full=Putative uncharacterized protein;	0.8049	COG0459	KOG0359	_	K09498	CCT6
comp132602_c0_seq1	128	2-385(+)	gi|321477346|gb|EFX88305.1|	hypothetical protein DAPPUDRAFT_311563 [Daphnia pulex]	0.59	GO:0030901;GO:0048008;GO:0021536;GO:0009791;GO:0005667;GO:0045944;GO:0060021;GO:0060325;GO:0045449;GO:0003700;GO:0048705	_	_	_	_	_	_	None	_
comp1326665_c0_seq1	187	1-561(-)	gi|380019673|ref|XP_003693727.1|	PREDICTED: uncharacterized protein LOC100863408 [Apis florea]	0.54	GO:0035248;GO:0006688;GO:0045747;GO:0043066	_	_	_	_	_	_	K01988	A4GALT
comp132890_c0_seq1	180	3-545(+)	gi|325303814|tpg|DAA34581.1|	TPA_exp: Ras-related GTPase [Amblyomma variegatum]	0.86	GO:0016020;GO:0006184;GO:0007264;GO:0005525;GO:0003924	7739.JGI271393	hypothetical protein	0.8727	COG1100	KOG0395	_	K07836	RAP1B
comp133217_c0_seq1	137	2-415(+)	gi|312376011|gb|EFR23229.1|	hypothetical protein AND_13286 [Anopheles darlingi]	0.85	GO:0000182;GO:0003696;GO:0005524;GO:0007095;GO:0016590;GO:0007076;GO:0008623;GO:0051310;GO:0006265;GO:0003729;GO:0006342;GO:0000712;GO:0003918;GO:0007052;GO:0006261;GO:0006312;GO:0009295;GO:0000795;GO:0000400	_	_	_	_	_	_	K03164	TOP2
comp1333864_c0_seq1	892	_	gi|218185242|gb|EEC67669.1|	hypothetical protein OsI_35096 [Oryza sativa Indica Group]	0.59	GO:0016020;GO:0004467;GO:0005777;GO:0001676;GO:0010193	_	_	_	_	_	_	K01897	ACSL, fadD
comp133669_c0_seq1	642	_	gi|504167777|ref|XP_004593547.1|	PREDICTED: ubiquitin carboxyl-terminal hydrolase 20 [Ochotona princeps]	0.68	GO:0071108;GO:0008277;GO:0006511;GO:0001664;GO:0004197;GO:0004221;GO:0070536	_	_	_	_	_	_	K11848	USP20_33
comp134466_c0_seq1	301	3-908(+)	gi|291223097|ref|XP_002731544.1|	PREDICTED: kinesin II-accessory 115 kDa polypeptide-like [Saccoglossus kowalevskii]	0.77	GO:0016939;GO:0005813;GO:0019894;GO:0046587;GO:0043087;GO:0007266;GO:0000794;GO:0008104;GO:0007017;GO:0005089;GO:0005876;GO:0008285	_	_	_	_	_	_	None	_
comp1351327_c0_seq1	289	1-867(-)	gi|189234944|ref|XP_972570.2|	PREDICTED: similar to phospholipase c epsilon [Tribolium castaneum]	0.57	GO:0009395;GO:0004435;GO:0006094;GO:0006000;GO:0006096;GO:0035556;GO:0015976;GO:0006013;GO:0006098;GO:0007242;GO:0046339;GO:0042132	_	_	_	_	_	_	K05860	PLCE
comp135316_c0_seq1	510	732-2261(-)	gi|194764935|ref|XP_001964583.1|	GF22974 [Drosophila ananassae]	0.73	GO:0007455;GO:0001746;GO:0031290;GO:0035271;GO:0035019;GO:0007406;GO:0005737;GO:0003705;GO:0007283;GO:0007179;GO:0008347;GO:0005667;GO:0030616;GO:0030718;GO:0005576;GO:0043565;GO:0042078;GO:0001745;GO:0045705;GO:0001744;GO:0007507;GO:0009649;GO:0030707;GO:0007480;GO:0030509;GO:0007476;GO:0009950;GO:0045944;GO:0008134;GO:0045887	7222.FBpp0152548	GH18642	0.8214	_	KOG3701	_	K04501	SMAD4
comp135493_c0_seq1	157	1-471(+)	gi|499013281|ref|XP_004537497.1|	PREDICTED: peptidyl-prolyl cis-trans isomerase FKBP14-like [Ceratitis capitata]	0.73	GO:0016020;GO:0003755;GO:0002121;GO:0005615;GO:0018208;GO:0005528;GO:0046716	7217.FBpp0115286	GF12094	0.7582	COG0545	_	_	K09577	FKBP14
comp1356021_c0_seq1	546	_	gi|291235884|ref|XP_002737873.1|	PREDICTED: potassium inwardly-rectifying channel, subfamily J, member 5-like [Saccoglossus kowalevskii]	0.51	GO:0007399;GO:0006813;GO:0044459;GO:0019226;GO:0034220;GO:0050789;GO:0044767;GO:0005515;GO:0005216;GO:0050896;GO:0042391	_	_	_	_	_	_	K05003	KCNJ10
comp1356518_c0_seq1	116	3-353(+)	gi|325297146|ref|NP_001191582.1|	cAMP-dependent protein kinase regulatory subunit [Aplysia californica]	0.8	GO:0045859;GO:0030552;GO:0007165;GO:0016301;GO:0008603;GO:0005952	_	_	_	_	_	_	K04739	PRKAR
comp136036_c0_seq1	197	3-596(+)	gi|260821245|ref|XP_002605944.1|	hypothetical protein BRAFLDRAFT_59751 [Branchiostoma floridae]	0.64	GO:0007166;GO:0051287;GO:0005737;GO:0044706;GO:0044703;GO:0006693;GO:0016404;GO:0060206	_	_	_	_	_	_	K00069	HPGD
comp136558_c0_seq1	168	2-508(+)	gi|66505413|ref|XP_623523.1|	PREDICTED: frizzled [Apis mellifera]	0.71	GO:0004888;GO:0007166	_	_	_	_	_	_	K02432	FZD1_7, fz
comp1385818_c0_seq1	432	_	gi|290996398|ref|XP_002680769.1|	histone deacetylase [Naegleria histone deacetylase [Naegleria gruberi]	0.72	GO:0045786;GO:0003714;GO:0048011;GO:0017136;GO:0005737;GO:0044281;GO:0000122;GO:0017053;GO:0044255;GO:0005667;GO:0046329;GO:0000118;GO:0005876;GO:0034739;GO:0010832;GO:0031078;GO:0042826;GO:0051225;GO:0043066;GO:0016481;GO:0032129;GO:0007219;GO:0008134;GO:0016575	_	_	_	_	_	_	K06067	HDAC1_2
comp1386516_c0_seq1	477	_	gi|321477065|gb|EFX88024.1|	hypothetical protein DAPPUDRAFT_305659 [Daphnia pulex]	0.86	GO:0007018;GO:0005874;GO:0005524;GO:0030286;GO:0006952;GO:0003777;GO:0006200;GO:0005576;GO:0009405;GO:0016887	_	_	_	_	_	_	K10413	DYNC1H
comp1387860_c0_seq1	116	3-350(-)	gi|241722583|ref|XP_002413681.1|	G-protein coupled receptor, putative [Ixodes scapularis]	0.89	GO:0050911;GO:0004715;GO:0004984;GO:0004983;GO:0016021;GO:0007268;GO:0050254;GO:0007218;GO:0007187	_	_	_	_	_	_	K14071	LKR
comp138866_c0_seq1	164	2-493(+)	gi|340059518|emb|CCC53905.1|	putative calmodulin [Trypanosoma vivax Y486]	0.72	GO:0030235;GO:1901841;GO:0045428;GO:0043274;GO:0072542;GO:0051343;GO:0050998;GO:0030426;GO:0031996;GO:0048306;GO:0032465;GO:0005513;GO:0019722;GO:0055117;GO:0000922;GO:0051000;GO:0035307;GO:0010880;GO:0060316;GO:0005886;GO:0031800;GO:0043388;GO:0005876;GO:0043548;GO:0031997;GO:0005634;GO:0005813;GO:0032516;GO:0008179;GO:0030017;GO:0002027;GO:0044325;GO:0007190;GO:0019904;GO:0005509;GO:0031432;GO:…	_	_	_	_	_	_	K02183	CALM
comp1392085_c0_seq1	552	_	gi|232140|sp|P30675.3|GPA1_COPCO	RecName: Full=Guanine nucleotide-binding protein subunit alpha G protein alpha subunit [Coprinellus congregatus]	0.67	GO:0005515;GO:0000166;GO:0031234;GO:0007188	_	_	_	_	_	_	K04640	GNA
comp1392814_c0_seq1	217	2-655(+)	gi|157821585|ref|NP_001102892.1|	B-cell CLL/lymphoma 3 [Rattus rCG53730 [Rattus norvegicus]	0.5	GO:0030098;GO:0042036;GO:0051247;GO:0002285;GO:0035556;GO:0045893;GO:0044424;GO:0006959;GO:0005515;GO:0002460;GO:0006952;GO:0051707;GO:0042981	_	_	_	_	_	_	K09258	BCL3
comp1394782_c0_seq1	376	_	gi|158519658|gb|AAV28534.2|	cell-division-cycle-2 kinase [Saccharum hybrid cultivar ROC16]	0.86	GO:0005524;GO:0009555;GO:0042023;GO:0016023;GO:0010005;GO:0007067;GO:0008353;GO:0005515;GO:0004693;GO:0005829;GO:0005886;GO:0005634;GO:0000074;GO:0009409;GO:0009069;GO:0000910;GO:0006468;GO:0040020;GO:0008284;GO:0009793	_	_	_	_	_	_	K02206	CDK2
comp1396125_c0_seq1	416	_	gi|328852370|gb|EGG01516.1|	hypothetical protein MELLADRAFT_50038 [Melampsora larici-populina 98AG31]	0.85	GO:0032258;GO:0000329;GO:0019898;GO:0006944;GO:0034727;GO:0000422;GO:0033110;GO:0005829;GO:0000407;GO:0006888;GO:0000045;GO:0000421	5270.UM05567.1	similar to IDI-7; Involved in cytoplasm to vacuole transport (Cvt) vesicles and autophagosom [...]	0.8609	_	KOG1654	_	K08341	GABARAP, ATG8, LC3
comp1397076_c0_seq1	437	_	gi|326436259|gb|EGD81829.1|	pre-mRNA-splicing factor prp46 [Salpingoeca sp. ATCC 50818]	0.88	GO:0080008;GO:0042742;GO:0010182;GO:0043518;GO:0009749;GO:0009755;GO:0050832;GO:0010204;GO:0005634;GO:0048825;GO:0009870;GO:0003824;GO:0043066;GO:0048364;GO:0006508;GO:0048366	45351.JGI247133	hypothetical protein	0.8531	COG2319	_	_	K12862	PLRG1, PRL1, PRP46
comp1398464_c0_seq1	288	3-866(-)	gi|241053668|ref|XP_002407612.1|	leucine-rich repeat-containing G-protein coupled receptor, lgr, putative [Ixodes scapularis]	0.64	GO:0016500;GO:0004721;GO:0006470;GO:0016021;GO:0007187	_	_	_	_	_	_	K08399	LGR6
comp1401356_c0_seq1	118	2-355(-)	gi|4895007|gb|AAD32698.1|AF143847_1	putative nicotinic acetylcholine receptor alpha 7-2 subunit [Heliothis virescens]	0.89	GO:0007165;GO:0005892;GO:0030054;GO:0006812;GO:0017085;GO:0046716;GO:0004889;GO:0045211	_	_	_	_	_	_	None	_
comp1403247_c0_seq1	128	1-387(+)	gi|341875018|gb|EGT30953.1|	hypothetical protein CAEBREN_26160 [Caenorhabditis brenneri]	0.87	GO:0055085;GO:0005524;GO:0006950;GO:0042626;GO:0005887;GO:0006200;GO:0040024;GO:0010038	_	_	_	_	_	_	None	_
comp140403_c0_seq1	126	3-380(+)	gi|290561849|gb|ADD38322.1|	Cysteine and glycine-rich protein 1 [Lepeophtheirus salmonis]	0.83	GO:0007369;GO:0007165;GO:0008270	_	_	_	_	_	_	K09377	CSRP
comp1404121_c0_seq1	153	1-462(+)	gi|482875827|gb|AGK40935.1|	toll-6 [Nilaparvata lugens]	0.79	GO:0016020;GO:0007165	_	_	_	_	_	_	None	_
comp1404856_c0_seq1	469	_	gi|292618021|ref|XP_689432.4|	PREDICTED: GTP-binding protein Di-Ras2-like [Danio rerio]	0.75	GO:0007165;GO:0000166	7955.ENSDARP00000097637	DIRAS family, GTP-binding RAS-like 2	0.7586	COG1100	KOG0395	_	K07841	DIRAS2
comp1406132_c0_seq1	169	1-507(-)	gi|321460891|gb|EFX71929.1|	hypothetical protein DAPPUDRAFT_255143 [Daphnia pulex]	0.94	GO:0030054;GO:0014069;GO:0055074;GO:0006811;GO:0008355;GO:0007616;GO:0017146;GO:0035235;GO:0005234;GO:0004970;GO:0007268;GO:0030288;GO:0042391;GO:0045211	_	_	_	_	_	_	K05208	GRIN1
comp140795_c0_seq1	363	1-1092(+)	gi|405978787|gb|EKC43149.1|	Sphingosine kinase 2 [Crassostrea gigas]	0.67	GO:0016310;GO:0016773;GO:0001568;GO:0035556;GO:0007166;GO:0007420;GO:0044281;GO:0043167;GO:0031401;GO:0006807;GO:0032651;GO:0005515;GO:0044255;GO:0000166;GO:1901576;GO:0044249;GO:0051050;GO:0060341;GO:0043231;GO:0016301;GO:0051649;GO:0006954;GO:0043005;GO:0044057;GO:0051128;GO:0009966;GO:0044444;GO:0044765;GO:0008284;GO:2000026	_	_	_	_	_	_	K04718	E2.7.1.91
comp140837_c0_seq1	229	2-688(+)	gi|195159812|ref|XP_002020772.1|	GL15835 [Drosophila persimilis]	0.69	GO:0031290;GO:0007412;GO:0045463;GO:0044331;GO:0005911;GO:0048841;GO:0016021;GO:0005886;GO:0045467;GO:0007413;GO:0050774;GO:0016339;GO:0042803;GO:0045296;GO:0007156;GO:0005509;GO:0016318	_	_	_	_	_	_	None	_
comp140837_c0_seq2	240	2-721(+)	gi|195159812|ref|XP_002020772.1|	GL15835 [Drosophila persimilis]	0.66	GO:0031290;GO:0007412;GO:0045463;GO:0044331;GO:0005911;GO:0048841;GO:0016021;GO:0005886;GO:0045467;GO:0007413;GO:0050774;GO:0016339;GO:0042803;GO:0045296;GO:0007156;GO:0005509;GO:0016318	7245.FBpp0258128	GE13118; Cadherins are calcium dependent cell adhesion proteins (By similarity)	0.7545	_	KOG3594	_	None	_
comp1410594_c0_seq1	554	_	gi|225426194|ref|XP_002279641.1|	PREDICTED: beta-adaptin-like protein C [Vitis vinifera]	0.66	GO:0005634;GO:0030276;GO:0048193;GO:0009630;GO:0005829;GO:0030244;GO:0015031;GO:0005886	_	_	_	_	_	_	K12392	AP1B1
comp141189_c0_seq1	550	_	gi|502119278|ref|XP_004496563.1|	PREDICTED: actin-depolymerizing factor 7-like [Cicer arietinum]	0.61	GO:0044763;GO:0043229;GO:0050896;GO:0005488	_	_	_	_	_	_	K05765	CFL
comp1413060_c0_seq1	118	2-358(+)	gi|322793923|gb|EFZ17209.1|	hypothetical protein SINV_06131 [Solenopsis invicta]	0.79	GO:0007169;GO:0005524;GO:0016021;GO:0006468;GO:0004714	7460.XP_397058	tyrosine-protein kinase transmembrane receptor Ror	0.8319	COG0515	_	_	K05122	ROR1, NTRKR1
comp1413858_c0_seq1	642	_	gi|148230798|ref|NP_001086488.1|	coatomer protein complex, subunit alpha [Xenopus laevis]	0.84	GO:0005615;GO:0007165;GO:0030126;GO:0006890;GO:0005179;GO:0006886;GO:0005829;GO:0030157;GO:0048205;GO:0005198	_	_	_	_	_	_	K05236	COPA
comp1414497_c0_seq1	144	1-432(-)	gi|390340122|ref|XP_790450.3|	PREDICTED: corticotropin-releasing factor receptor 1-like [Strongylocentrotus purpuratus]	0.65	GO:0007186;GO:0016020;GO:0044464;GO:0004930	6945.ISCW017942-PA	corticotropin releasing factor receptor, putative	0.7568	_	KOG4564	_	K04579	CRHR2
comp141494_c0_seq1	134	333-737(+)	gi|50513239|gb|AAT77811.1|	calpain B [Gecarcinus lateralis]	0.85	GO:0004198;GO:0016540;GO:0006911;GO:0042335;GO:0030036;GO:0021919;GO:0005737;GO:0043025;GO:0008340;GO:0006508;GO:0005509;GO:0015629	_	_	_	_	_	_	K08585	CAPNN
comp14154_c0_seq1	670	_	gi|254692859|ref|NP_079634.2|	NADH dehydrogenase [ubiquinone]	0.75	GO:0005759;GO:0003954;GO:0005747;GO:0009749;GO:0006118;GO:0055114	_	_	_	_	_	_	K03953	NDUFA9
comp1415962_c0_seq1	125	1-378(+)	gi|341874670|gb|EGT30605.1|	hypothetical protein CAEBREN_11576 [Caenorhabditis brenneri]	0.63	GO:0043154;GO:0005783;GO:0031090;GO:0009888;GO:0016628;GO:0019814;GO:0044446;GO:0012505;GO:0005634;GO:0044425;GO:0043066;GO:0006695;GO:0006979;GO:0042605;GO:0006955;GO:0019899	_	_	_	_	_	_	K09828	DHCR24
comp1424058_c0_seq1	138	169-585(+)	gi|118785484|ref|XP_314691.2|	AGAP008588-PA [Anopheles gambiae str. PEST]	0.8	GO:0004889;GO:0007165;GO:0016021;GO:0030054;GO:0006812;GO:0005886;GO:0045211	7070.C3TS33	Truncated nicotinic acetylcholine receptor subunit a6	0.7734	_	KOG3646	_	None	_
comp142504_c0_seq1	140	2-424(+)	gi|156373875|ref|XP_001629535.1|	predicted protein [Nematostella predicted protein [Nematostella vectensis]	0.81	GO:0046330;GO:0072384;GO:0051233;GO:0090316;GO:0031424;GO:0043025;GO:0060789;GO:0071777;GO:0035088;GO:0003334;GO:0034191;GO:0051017;GO:0051988;GO:0031996;GO:0007097;GO:0051489;GO:0072686;GO:0090136;GO:0006184;GO:0042802;GO:0090135;GO:0010628;GO:0045740;GO:0005912;GO:0003924;GO:0043005;GO:0035264;GO:0030175;GO:0043552;GO:0007266;GO:0060070;GO:0030141;GO:0034332;GO:0031069;GO:0042176;GO:0060047;GO:…	45351.JGI189251	hypothetical protein	0.8071	COG1100	KOG0393	_	K04393	CDC42
comp142539_c0_seq1	258	2-778(+)	gi|157117289|ref|XP_001653014.1|	nuclear hormone receptor ftz-f1 beta [Aedes aegypti]	0.52	GO:0005515;GO:0007275;GO:0050896;GO:0048856	_	_	_	_	_	_	K08705	NR5A3, ftz-f1
comp1429417_c0_seq1	143	3-431(-)	gi|321476721|gb|EFX87681.1|	hypothetical protein DAPPUDRAFT_43086 [Daphnia pulex]	0.89	GO:0043087;GO:0005622;GO:0035023;GO:0005543;GO:0005089	_	_	_	_	_	_	K07525	NGEF, EPHEXIN
comp1429438_c0_seq1	415	_	gi|158299385|ref|XP_319489.4|	AGAP010292-PA [Anopheles gambiae str. PEST]	0.63	GO:0042110;GO:0030676;GO:0045785;GO:0035556;GO:0043087;GO:0005515;GO:0006955;GO:0007229;GO:0006909	_	_	_	_	_	_	K05730	VAV
comp143130_c0_seq1	256	1-768(-)	gi|498943459|ref|XP_004521881.1|	PREDICTED: uncharacterized protein LOC101457842 [Ceratitis capitata]	0.71	GO:0042023;GO:0001077;GO:0019730;GO:0040005;GO:0060537;GO:0000122;GO:0000083;GO:0007113;GO:0043565;GO:0035206;GO:0008630;GO:0031523;GO:0005201;GO:0007475;GO:0008362;GO:0046331;GO:0008069;GO:0045850;GO:0048813;GO:0005578;GO:0035189;GO:0007424;GO:0007307;GO:0045944;GO:0051726;GO:0040007;GO:0008134;GO:0008284	_	_	_	_	_	_	None	_
comp143230_c0_seq1	107	289-609(-)	gi|321477351|gb|EFX88310.1|	hypothetical protein DAPPUDRAFT_42714 [Daphnia pulex]	0.7	GO:0043087;GO:0005085;GO:0035556	_	_	_	_	_	_	None	_
comp143257_c0_seq1	534	2-1606(+)	gi|321472519|gb|EFX83489.1|	hypothetical protein DAPPUDRAFT_315775 [Daphnia pulex]	0.79	GO:0016020;GO:0005201;GO:0007165;GO:0005044;GO:0005509;GO:0005578	_	_	_	_	_	_	None	_
comp143410_c0_seq1	265	3-797(-)	gi|348575197|ref|XP_003473376.1|	PREDICTED: slit homolog 3 protein [Cavia porcellus]	0.55	GO:0009887;GO:0005615;GO:0010629;GO:0005488;GO:0007411;GO:0008285	_	_	_	_	_	_	K06850	SLIT3
comp143533_c0_seq1	365	66-1160(+)	gi|125978369|ref|XP_001353217.1|	GA10411 [Drosophila pseudoobscura pseudoobscura]	0.7	GO:0008593;GO:0001745;GO:0007293;GO:0005783;GO:0007451;GO:0036011;GO:0048190;GO:0005797;GO:0008587;GO:0033829;GO:0006493;GO:0035017;GO:0016021;GO:0006004	_	_	_	_	_	_	K05948	FNG
comp143585_c0_seq1	246	3-740(-)	gi|391338476|ref|XP_003743584.1|	PREDICTED: E3 ubiquitin-protein ligase Nedd-4-like [Metaseiulus occidentalis]	0.62	GO:0044700;GO:0031623;GO:0016567;GO:0007154;GO:0045807;GO:0044424;GO:0005515;GO:0050808;GO:0007411	_	_	_	_	_	_	K10591	NEDD4, RSP5
comp143599_c0_seq1	290	1-873(+)	gi|195430072|ref|XP_002063081.1|	GK21733 [Drosophila willistoni]	0.73	GO:0005783;GO:0010890;GO:0004467;GO:0035282;GO:0005811;GO:0006631;GO:0007268;GO:0007411	_	_	_	_	_	_	K01897	ACSL, fadD
comp143764_c0_seq1	267	2-805(+)	gi|270001881|gb|EEZ98328.1|	hypothetical protein TcasGA2_TC000782 [Tribolium castaneum]	0.73	GO:1901363;GO:0097159;GO:0007165	_	_	_	_	_	_	K00901	E2.7.1.107, DGK, dgkA
comp143882_c0_seq1	149	2-451(+)	gi|70992869|ref|XP_751283.1|	CFEM domain protein [Aspergillus fumigatus Af293]	0.51	GO:0005634;GO:0003677;GO:0006281;GO:0006352;GO:0016570	_	_	_	_	_	_	K15178	RTF1
comp1439521_c0_seq1	135	3-407(-)	gi|242006424|ref|XP_002424050.1|	N-methyl-D-aspartate receptor, putative [Pediculus humanus corporis]	0.82	GO:0030054;GO:0006811;GO:0035235;GO:0005234;GO:0004970;GO:0016021;GO:0007268;GO:0030288;GO:0005886;GO:0045211	7176.CPIJ017065-PA	NMDA-type glutamate receptor subunit 1	0.808	_	KOG4440	_	K05208	GRIN1
comp144841_c0_seq1	295	290-1174(-)	gi|348517397|ref|XP_003446220.1|	PREDICTED: hepatocyte nuclear factor 3-beta-like [Oreochromis niloticus]	0.76	GO:0009952;GO:0045666;GO:0007596;GO:0001705;GO:0032289;GO:0007418;GO:0003690;GO:0003705;GO:0006357;GO:0021533;GO:0005667;GO:0043565;GO:0021779;GO:0033504;GO:0007492;GO:0060441;GO:0021904;GO:0048665;GO:0031018;GO:0051090;GO:0045665;GO:0019904;GO:0048319;GO:0008301;GO:0008134;GO:0060487	7955.ENSDARP00000007827	Forkhead box protein A2 (Axial protein); May play a crucial role in specification of both th [...]	1	COG5025	KOG3563	_	K08035	FOXA2, HNF3B
comp144990_c0_seq1	667	389-2389(+)	gi|321463821|gb|EFX74834.1|	hypothetical protein DAPPUDRAFT_323993 [Daphnia pulex]	0.61	GO:0003707;GO:0005524;GO:0006355;GO:0009069;GO:0006468;GO:0004674;GO:0005667;GO:0008270;GO:0043565;GO:0043401;GO:0045449;GO:0003700	7460.XP_392769	hormone receptor-like in 78	0.9167	_	KOG3575	_	K14031	NR2CN
comp145249_c0_seq1	365	1-1095(-)	gi|321454610|gb|EFX65774.1|	hypothetical protein DAPPUDRAFT_332869 [Daphnia pulex]	0.59	GO:0042023;GO:0001077;GO:0019730;GO:0040005;GO:0060537;GO:0000122;GO:0043565;GO:0035206;GO:0008630;GO:0031523;GO:0007475;GO:0008362;GO:0046331;GO:0008069;GO:0045850;GO:0048813;GO:0035189;GO:0007424;GO:0045944;GO:0000082;GO:0051726;GO:0008134	_	_	_	_	_	_	None	_
comp1453992_c0_seq1	148	2-448(+)	gi|507548549|ref|XP_004658099.1|	PREDICTED: DNA excision repair protein ERCC-6 [Jaculus jaculus]	0.71	GO:0003677;GO:0005524;GO:0006284;GO:0000303;GO:0047485;GO:0006283;GO:0009636;GO:0010332;GO:0007256;GO:0032786;GO:0005730;GO:0003682;GO:0008630;GO:0010165;GO:0000785;GO:0045494;GO:0010224;GO:0035264;GO:0007257;GO:0008022;GO:0008023;GO:0008094;GO:0003678;GO:0005657;GO:0032403;GO:0006290	_	_	_	_	_	_	K10841	ERCC6, CSB, RAD26
comp1455072_c0_seq1	106	1-318(+)	gi|357617500|gb|EHJ70829.1|	neuropeptide receptor A4 [Danaus plexippus]	0.58	GO:0016020;GO:0001601;GO:0007268;GO:0007218;GO:0007187;GO:0003007	_	_	_	_	_	_	K04209	NPYNR
comp145522_c0_seq1	173	2-523(+)	gi|149633801|ref|XP_001508979.1|	PREDICTED: protein C-ets-2-like [Ornithorhynchus anatinus]	0.83	GO:0007165;GO:0060982;GO:0035259;GO:0045944;GO:0000977;GO:0005667;GO:0001569;GO:0045449;GO:0003700	_	_	_	_	_	_	K02678	ETS, pnt
comp14570_c0_seq1	375	_	gi|3451071|emb|CAA20467.1|	beta adaptin-like protein [Arabidopsis thaliana]	0.75	GO:0005634;GO:0030276;GO:0030117;GO:0048193;GO:0009630;GO:0005829;GO:0030244;GO:0005886;GO:0015031	_	_	_	_	_	_	K12392	AP1B1
comp1459805_c0_seq1	375	_	gi|91091736|ref|XP_967876.1|	PREDICTED: similar to spineless CG6993-PA [Tribolium castaneum]	0.91	GO:0003989;GO:0005634;GO:0003677;GO:0009317;GO:0006090;GO:0007165;GO:0006355;GO:0046983;GO:0006633;GO:0004871	_	_	_	_	_	_	None	_
comp146216_c0_seq1	461	2-1384(-)	gi|307189008|gb|EFN73525.1|	Breakpoint cluster region protein [Camponotus floridanus]	0.7	GO:0007165;GO:0030695	_	_	_	_	_	_	None	_
comp146321_c0_seq1	523	3-1574(+)	gi|498996183|ref|XP_004533296.1|	PREDICTED: neural-cadherin-like [Ceratitis capitata]	0.9	GO:0031290;GO:0007412;GO:0045463;GO:0044331;GO:0005887;GO:0005911;GO:0048841;GO:0045467;GO:0007413;GO:0007165;GO:0004872;GO:0050774;GO:0016339;GO:0042803;GO:0045296;GO:0016342;GO:0007156;GO:0005509;GO:0016318;GO:0008013	_	_	_	_	_	_	None	_
comp1464512_c0_seq1	140	2-424(+)	gi|118403894|ref|NP_001072863.1|	phosphodiesterase 4B, cAMP-specific [Xenopus (Silurana) tropicalis]	0.81	GO:0010738;GO:0007608;GO:0046872;GO:0004114;GO:0035690;GO:0043949;GO:0006144;GO:0048471	_	_	_	_	_	_	K01120	E3.1.4.17, PDE
comp146544_c0_seq1	525	_	gi|301095395|ref|XP_002896798.1|	deoxyuridine 5'-triphosphate nucleotidohydrolase [Phytophthora infestans T30-4]	0.79	GO:0006281;GO:0006206;GO:0046080;GO:0004170	436017.A4S9G9	predicted protein	0.8227	COG0756	KOG3370	_	K01520	E3.6.1.23, dut
comp147367_c0_seq1	131	1-396(+)	gi|219363613|ref|NP_001136508.1|	uncharacterized protein LOC100216623 [Zea mays]	0.76	GO:0016020;GO:0000166;GO:0005622;GO:0050896;GO:0043167	559295.KLTH0H02222g	KLTH0H02200p	0.7692	COG1100	KOG0070	NOG292397	K07977	ARF
comp1474814_c0_seq1	353	_	gi|241086353|ref|XP_002409162.1|	glutamate receptor, putative [Ixodes scapularis]	0.86	GO:0030054;GO:0006811;GO:0035235;GO:0005234;GO:0004970;GO:0016021;GO:0007268;GO:0030288;GO:0005886;GO:0045211	_	_	_	_	_	_	K05199	GRIA3
comp1479875_c0_seq1	668	_	gi|242079721|ref|XP_002444629.1|	hypothetical protein SORBIDRAFT_07g025030 [Sorghum bicolor]	0.71	GO:0004175;GO:0043231;GO:0006508;GO:0000502;GO:0050896;GO:0009987	_	_	_	_	_	_	K02738	PSMB6
comp1482118_c0_seq1	125	3-377(-)	gi|345489376|ref|XP_001604021.2|	PREDICTED: multidrug resistance-associated protein 1-like isoform 1 [Nasonia vitripennis]	0.81	GO:0030241;GO:0005703;GO:0005524;GO:0055114;GO:0007427;GO:0006941;GO:0016021;GO:0008307;GO:0007298;GO:0005863;GO:0060361;GO:0032440;GO:0045214;GO:0007527;GO:0007517;GO:0031672;GO:0006364;GO:0042803;GO:0005884;GO:0031427;GO:0006200;GO:0000146;GO:0008559;GO:0050821;GO:0006855;GO:0030898	_	_	_	_	_	_	None	_
comp148393_c0_seq1	242	194-919(+)	gi|259016718|gb|ACV89347.1|	Cu/Zn superoxide dismutase [Knorringia sibirica]	0.69	GO:0010035;GO:0006950	_	_	_	_	_	_	K04565	E1.15.1.1C, sodC, SOD1
comp148393_c0_seq2	1133	_	gi|259016718|gb|ACV89347.1|	Cu/Zn superoxide dismutase [Knorringia sibirica]	0.69	GO:0010035;GO:0006950	_	_	_	_	_	_	K04565	E1.15.1.1C, sodC, SOD1
comp148430_c0_seq1	228	1-684(+)	gi|344287946|ref|XP_003415712.1|	PREDICTED: matrilysin-like [Loxodonta africana]	0.72	GO:0044699;GO:0046872;GO:0008237;GO:0042742	_	_	_	_	_	_	None	_
comp148814_c0_seq1	232	3-698(-)	gi|24639484|ref|NP_726856.1|	dunce, isoform N [Drosophila PDE4C_DROME RecName: Full=cAMP-specific 3',5'-cyclic phosphodiesterase, isoforms N/G; AltName: Full=Lea	0.72	GO:0007619;GO:0046958;GO:0009187;GO:0048675;GO:0048477;GO:0001661;GO:0046331;GO:0008355;GO:0019933;GO:0045475;GO:0004115;GO:0007268;GO:0007614;GO:0048149	_	_	_	_	_	_	K01120	E3.1.4.17, PDE
comp148915_c0_seq1	1288	_	gi|307104817|gb|EFN53069.1|	eukaryotic initiation factor 4A (ATP-dependent RNA helicase eIF4A) [Chlorella variabilis]	0.81	GO:0005840;GO:0016020;GO:0048046;GO:0005524;GO:0006096;GO:0008026;GO:0003743;GO:0005515;GO:0005730;GO:0005829;GO:0009651;GO:0009506;GO:0006094;GO:0006446;GO:0046686;GO:0005618;GO:0005794	59689.Al_scaffold_0003_1445	annotation not avaliable	0.8069	COG0513	KOG0327	_	K03257	EIF4A
comp1493827_c0_seq1	121	1-366(+)	gi|321458840|gb|EFX69901.1|	hypothetical protein DAPPUDRAFT_228516 [Daphnia pulex]	0.74	GO:0007399;GO:0050794;GO:0035479;GO:0016020;GO:0031988;GO:0007267;GO:0048844;GO:0043234;GO:0000166;GO:0050896;GO:0048839;GO:0044444;GO:0050877;GO:0044765;GO:0044428	_	_	_	_	_	_	K10358	MYO6
comp149684_c0_seq1	150	794-1243(-)	gi|254939725|gb|ACT88125.1|	AT15141p [Drosophila melanogaster]	1	GO:0030425;GO:0007528;GO:0030048;GO:0051533;GO:0016477;GO:0043274;GO:2001020;GO:0016061;GO:0004683;GO:0031489;GO:0031996;GO:0032465;GO:0051489;GO:0005513;GO:0031476;GO:0006468;GO:0046331;GO:0007099;GO:0043277;GO:0040010;GO:0008049;GO:0006898;GO:0016060;GO:0007052;GO:0042052;GO:0051726;GO:0031475;GO:0005954;GO:0048786;GO:0000922;GO:0016028;GO:0005524;GO:0051296;GO:0007616;GO:0009792;GO:0030496;GO:…	7739.JGI132038	hypothetical protein; Calmodulin mediates the control of a large number of enzymes and other [...]	1	COG5126	KOG0027	NOG277755	K02183	CALM
comp1498705_c0_seq1	365	_	gi|242011499|ref|XP_002426486.1|	ral, putative [Pediculus humanus corporis]	0.67	GO:0008593;GO:0007464;GO:0006184;GO:0003924;GO:0046329;GO:0022604;GO:0030165;GO:0045087;GO:0007298;GO:0007265;GO:0005886	_	_	_	_	_	_	K07834	RALA
comp150083_c0_seq1	446	3-1340(-)	gi|242020330|ref|XP_002430608.1|	conserved hypothetical protein [Pediculus humanus corporis]	0.81	GO:0005856;GO:0007165	7070.XP_971376	similar to CG31304 CG31304-PA	0.7891	_	KOG3552	_	None	_
comp150326_c0_seq1	1195	_	gi|168025677|ref|XP_001765360.1|	predicted protein [Physcomitrella patens subsp. patens]	0.74	GO:0005634;GO:0042744;GO:0030170	39946.BGIOSIBCE017580	Os05g0150000	0.75	COG0325	_	_	K06997	K06997
comp150801_c0_seq1	571	2-1714(-)	gi|158296109|ref|XP_316615.4|	AGAP006590-PD [Anopheles gambiae str. PEST]	0.74	GO:0043087;GO:0005057;GO:0005622;GO:0035023;GO:0005543;GO:0005089	_	_	_	_	_	_	K05731	TIAM
comp150801_c0_seq3	544	2-1633(-)	gi|158296109|ref|XP_316615.4|	AGAP006590-PD [Anopheles gambiae str. PEST]	0.74	GO:0043087;GO:0005057;GO:0005622;GO:0035023;GO:0005543;GO:0005089	_	_	_	_	_	_	K05731	TIAM
comp15084_c0_seq1	705	_	gi|390598881|gb|EIN08278.1|	serine/threonine-protein phosphatase PP1 [Punctularia strigosozonata HHB-11173 SS5]	0.97	GO:0007059;GO:0030437;GO:0007114;GO:0005847;GO:0005816;GO:0016576;GO:0007094;GO:0004722;GO:0005977;GO:0030846;GO:0005730;GO:0034501;GO:0000778;GO:0006109;GO:0000164;GO:0030847;GO:0000077;GO:0006873;GO:0001400;GO:0006364;GO:0009408;GO:0005935;GO:0000076;GO:0007126;GO:0031297;GO:0000903	5270.UM03080.1	serine/threonine protein phosphatase	0.9658	COG0639	KOG0374	_	K06269	PPP1C
comp1509951_c0_seq1	457	_	gi|313239110|emb|CBY14087.1|	unnamed protein product [Oikopleura unnamed protein product [Oikopleura dioica]	0.81	GO:0006804;GO:0006979;GO:0055114;GO:0005737;GO:0008379	5671.LinJ15.1130	tryparedoxin peroxidase	0.8	COG0450	KOG0852	_	K11185	TRYP
comp151169_c0_seq1	517	_	gi|328719753|ref|XP_001947292.2|	PREDICTED: hypothetical protein LOC100166339 [Acyrthosiphon pisum]	0.53	GO:0050794;GO:0044424;GO:0007275;GO:0048856;GO:0044767;GO:0007049;GO:0006974;GO:0006259	_	_	_	_	_	_	K08775	BRCA2, FANCD1
comp151182_c0_seq1	304	2-913(-)	gi|357608164|gb|EHJ65855.1|	Endoprotease FURIN [Danaus plexippus]	0.86	GO:0016020;GO:0004252;GO:0007169;GO:0005524;GO:0006508;GO:0006468;GO:0004714	7070.XP_969307	similar to Endoprotease FURIN	0.8976	COG1404	_	_	None	_
comp151360_c0_seq1	211	2-637(+)	gi|242014056|ref|XP_002427714.1|	sodium/potassium-transporting ATPase alpha-1 chain, putative [Pediculus humanus corporis]	0.95	GO:0008217;GO:0016323;GO:0005524;GO:0002028;GO:0019497;GO:0006754;GO:0005391;GO:0045822;GO:0045989;GO:0030315;GO:0042493;GO:0006813;GO:0045823;GO:0031947;GO:0003869;GO:0005890;GO:0046872;GO:0002026	_	_	_	_	_	_	K01539	ATP1A
comp1514223_c0_seq1	122	2-367(+)	gi|507630617|ref|XP_004627735.1|	PREDICTED: rho-related GTP-binding protein RhoQ [Octodon degus]	0.8	GO:0032427;GO:0008286;GO:0030866;GO:0032956;GO:0090005;GO:0046326;GO:0005829;GO:0005886;GO:0051491;GO:0006184;GO:0008360;GO:0003924;GO:0005884;GO:0005522;GO:0045121;GO:0045944;GO:0005525;GO:0051056	9796.ENSECAP00000005068	ras homolog gene family, member Q	0.7967	COG1100	KOG0393	_	K07194	RHOQ, TC10
comp151950_c0_seq1	293	93-971(-)	gi|390353660|ref|XP_790508.3|	PREDICTED: xanthine dehydrogenase/oxidase [Strongylocentrotus purpuratus]	0.69	GO:0043167;GO:0019222;GO:0048523;GO:0044237;GO:0048856;GO:0009966;GO:0071704;GO:0016491;GO:2000026;GO:0045595	_	_	_	_	_	_	K00106	XDH
comp152053_c0_seq2	177	113-643(-)	gi|498995764|ref|XP_004533190.1|	PREDICTED: serine/threonine-protein kinase D1-like isoform X1 [Ceratitis PREDICTED: serine/threonine-protein kinase D1-like	0.75	GO:0016043;GO:0042127;GO:0071944;GO:0010595;GO:0048731;GO:0043167;GO:0007243;GO:0051091;GO:0000166;GO:0043231;GO:0009069;GO:0006468;GO:0044767;GO:0004674;GO:0048584;GO:0051094;GO:0044444;GO:0070887;GO:2000026;GO:0045595	28377.ENSACAP00000015765	protein kinase D1	0.7863	COG0515	_	_	K06070	PKD
comp1520721_c0_seq1	198	3-599(+)	gi|478733528|gb|AGJ51189.1|	olfactory ionotropic receptor IR8a [Panulirus argus]	0.89	GO:0035235;GO:0007268;GO:0016021;GO:0004970;GO:0005234;GO:0030288;GO:0006811	_	_	_	_	_	_	None	_
comp152123_c0_seq1	308	3-929(+)	gi|308504217|ref|XP_003114292.1|	CRE-PKC-1 protein [Caenorhabditis remanei]	0.68	GO:0000165;GO:0016310;GO:2001024;GO:0009069;GO:0048009;GO:0004697;GO:0005488;GO:0016079;GO:0050975;GO:0005623;GO:0040012;GO:0007218;GO:0006935;GO:0040024	_	_	_	_	_	_	K06068	NPKC
comp152152_c0_seq1	262	2-787(+)	gi|225717542|gb|ACO14617.1|	Ras-related protein Rab-3 [Caligus clemensi]	0.85	GO:0007264;GO:0005525;GO:0015031	7176.CPIJ010256-PA	GTP-binding protein Rab-3D	0.91	COG1100	KOG0093	_	K07976	RAB
comp152543_c0_seq1	211	3-635(-)	gi|195402313|ref|XP_002059751.1|	GJ18433 [Drosophila virilis]	0.9	GO:0046872;GO:0007268;GO:0019992;GO:0035556	_	_	_	_	_	_	K15293	UNC13, MUNC13
comp152645_c0_seq1	212	2-637(+)	gi|52345478|ref|NP_001004787.1|	RAB1A, member RAS oncogene family [Xenopus (Silurana) tropicalis]	0.8	GO:0007264;GO:0005525;GO:0015031;GO:0005886	7955.ENSDARP00000043001	RAB1A, member RAS oncogene family	0.8152	COG1100	KOG0084	_	K07874	RAB1A
comp152645_c1_seq1	173	1-519(+)	gi|71834648|ref|NP_001025428.1|	ras-related protein Rab-27A [Danio rerio]	0.82	GO:0030425;GO:0016324;GO:0007596;GO:0045921;GO:0042470;GO:0043320;GO:0007264;GO:0031489;GO:0030318;GO:0070382;GO:0006605;GO:0030667;GO:0019003;GO:0006184;GO:0032585;GO:0005764;GO:0001750;GO:0071985;GO:0003924;GO:0043316;GO:0032402;GO:0019904;GO:0016459;GO:0005794;GO:0005525	7955.ENSDARP00000059319	Ras-related protein Rab-27A	0.824	COG1100	KOG0081	_	K07885	RAB27A
comp1526805_c0_seq1	165	2-496(-)	gi|157134827|ref|XP_001656462.1|	voltage and ligand gated potassium channel [Aedes aegypti]	0.95	GO:0023014;GO:0003707;GO:0007629;GO:0006355;GO:0048150;GO:0042066;GO:0000160;GO:0008016;GO:0043565;GO:0008270;GO:0009365;GO:0008076;GO:0051259;GO:0007608;GO:0005634;GO:0005249;GO:0006813;GO:0007619;GO:0055085;GO:0007612;GO:0007417;GO:0004879;GO:0000155	_	_	_	_	_	_	K05322	KCNHN
comp1529110_c0_seq1	122	2-370(+)	gi|189240973|ref|XP_967534.2|	PREDICTED: similar to tnf receptor associated factor [Tribolium castaneum]	0.82	GO:0046330;GO:0007018;GO:0005874;GO:0007250;GO:0016567;GO:0004842;GO:0005858;GO:0001539;GO:0006200;GO:0008270;GO:0003777;GO:0016740;GO:0042981;GO:0016887	_	_	_	_	_	_	K09848	TRAF4
comp1532210_c0_seq1	412	_	gi|195055334|ref|XP_001994574.1|	GH17319 [Drosophila grimshawi]	0.96	GO:0003707;GO:0007510;GO:0006355;GO:0046982;GO:0007503;GO:0005737;GO:0007465;GO:0061331;GO:0042331;GO:0043565;GO:0008270;GO:0001700;GO:0007270;GO:0005634;GO:0007464;GO:0042803;GO:0004879;GO:0001078;GO:0030522;GO:0007419;GO:0007462;GO:0043401	7159.AAEL002768-PA	coup transcription factor	0.9589	_	KOG3575	_	K14032	NR2F3, svp
comp1533238_c0_seq1	383	_	gi|117670126|gb|ABK56707.1|	odd-skipped 2 protein [Parhyale hawaiensis]	0.69	GO:0040010;GO:0040011;GO:0043050;GO:0002119	_	_	_	_	_	_	K09215	OSR, ODD
comp1533451_c0_seq1	157	3-476(+)	gi|478256149|gb|ENN76347.1|	hypothetical protein YQE_07124, partial [Dendroctonus ponderosae]	0.75	GO:0042325;GO:0003677;GO:0032508;GO:0043167;GO:0005515;GO:0042555;GO:0000166;GO:0006974;GO:0000216;GO:0005654;GO:0000785;GO:0006270;GO:0006271;GO:0000084;GO:0004003;GO:0000075;GO:0000082;GO:0005657	_	_	_	_	_	_	K02540	MCM2
comp153540_c0_seq1	375	2-1126(-)	gi|170048278|ref|XP_001851801.1|	ATP-binding cassette sub-family A member 3 [Culex quinquefasciatus]	0.49	GO:0044707;GO:0046907;GO:0034185;GO:0007166;GO:0033344;GO:0005319;GO:0000166;GO:0010033;GO:0015914;GO:1901576;GO:0048518;GO:0005886;GO:0044249;GO:0042157;GO:0044425;GO:0006996;GO:0030139;GO:0009150;GO:0055088;GO:0046903;GO:0006629	_	_	_	_	_	_	K05643	ABCA3
comp1536412_c0_seq1	167	1-504(+)	gi|321474115|gb|EFX85081.1|	hypothetical protein DAPPUDRAFT_314397 [Daphnia pulex]	0.63	GO:0016310;GO:0007165;GO:0004672	_	_	_	_	_	_	K04733	IRAK4
comp153650_c0_seq1	138	1-414(-)	gi|242011126|ref|XP_002426306.1|	zinc finger protein, putative [Pediculus humanus corporis]	0.55	GO:0005634;GO:0040034;GO:0002009;GO:0018991;GO:0043067;GO:0040010;GO:0000977;GO:0040011;GO:0040035;GO:0002119	_	_	_	_	_	_	K06230	GLI
comp1538043_c0_seq1	169	3-512(+)	gi|498932209|ref|XP_004519330.1|	PREDICTED: uncharacterized protein LOC101453370 isoform X1 [Ceratitis capitata]	0.76	GO:0016324;GO:0005112;GO:0045746;GO:0035152;GO:0046716	_	_	_	_	_	_	None	_
comp153945_c0_seq1	318	2-958(+)	gi|321463308|gb|EFX74325.1|	hypothetical protein DAPPUDRAFT_226784 [Daphnia pulex]	0.61	GO:0034349;GO:0043293;GO:0051402;GO:0010659;GO:0031072;GO:0051260;GO:0071560;GO:0007584;GO:0006917;GO:0006309;GO:0005634;GO:0030154;GO:0042802;GO:0007568;GO:0001666;GO:0030900;GO:0016505;GO:0006919;GO:0001843	_	_	_	_	_	_	K02084	APAF1
comp1540428_c0_seq1	143	1-429(+)	gi|295016231|emb|CBH30981.1|	Sp6-9 protein [Parhyale hawaiensis]	0.78	GO:0045743;GO:0005634;GO:0006355;GO:0008270;GO:0030326;GO:0003690;GO:0035118	7070.Q6W2J7	Sp-like zinc finger protein	1	COG5048	_	_	K09198	SP8
comp154059_c0_seq1	110	3-332(+)	gi|350535955|ref|NP_001234892.1|	nicotinic acetylcholine receptor alpha 3 subunit precursor [Nasonia vitripennis]	0.85	GO:0004889;GO:0007165;GO:0016021;GO:0030054;GO:0006812;GO:0005886;GO:0045211	7237.FBpp0286405	GA28361	0.8043	_	KOG3645	_	K05312	CHRNN
comp154197_c0_seq1	117	2-352(+)	gi|157109041|ref|XP_001650498.1|	lipin [Aedes aegypti]	0.71	GO:0009395;GO:0019217;GO:0030514;GO:0007474;GO:0045941;GO:0005737;GO:0006687;GO:0003713;GO:0042594;GO:0005667;GO:0008195;GO:0055088;GO:0035183;GO:0019432	_	_	_	_	_	_	K15728	LPIN
comp154374_c0_seq1	177	2-532(+)	gi|478258513|gb|ENN78588.1|	hypothetical protein YQE_04955, partial [Dendroctonus ponderosae]	0.92	GO:0045859;GO:0030552;GO:0007165;GO:0016301;GO:0008603;GO:0005952	7460.XP_396167	cAMP-dependent protein kinase type I regulatory subunit	0.9329	COG0664	KOG1113	_	K04739	PRKAR
comp154519_c0_seq1	695	_	gi|168022742|ref|XP_001763898.1|	predicted protein [Physcomitrella patens subsp. patens]	0.88	GO:0005524;GO:0006260;GO:0009202;GO:0005971;GO:0055114;GO:0004748;GO:0046686;GO:0006144;GO:0009186;GO:0006206	39946.BGIOSIBCE029016	Os06g0168500 ; Provides the precursors necessary for DNA synthesis. Catalyzes the biosynthes [...]	0.8701	COG0209	_	_	K10807	RRM1
comp15460_c0_seq1	233	2-700(+)	gi|242009663|ref|XP_002425602.1|	guanine-nucleotide exchange factor c3g, putative [Pediculus humanus corporis]	0.83	GO:0043087;GO:0005622;GO:0005085;GO:0051056	7460.XP_393346	similar to C3G CG3126-PA, isoform A	0.8178	_	KOG3417	_	K06277	RAPGEF1, GRF2
comp154647_c0_seq1	197	2-592(-)	gi|381353158|pdb|4D8O|A	Chain A, Crystal Structure Of The Ankyrin-B Zu5-Zu5-Upa-Dd Tandem	0.59	GO:0016323;GO:0003283;GO:0019901;GO:0086015;GO:0010881;GO:0048468;GO:0060307;GO:0030507;GO:0086005;GO:0072659;GO:0070972;GO:0086091;GO:0010628;GO:0030017;GO:0008091;GO:0044325;GO:0032414;GO:0031647;GO:0086014	_	_	_	_	_	_	K10380	ANK
comp154653_c0_seq1	177	1-534(+)	gi|194863421|ref|XP_001970432.1|	GG23376 [Drosophila erecta]	0.7	GO:0005783;GO:0010890;GO:0004467;GO:0035282;GO:0005811;GO:0006631;GO:0007268;GO:0007411	_	_	_	_	_	_	K01897	ACSL, fadD
comp154938_c0_seq1	246	1-738(-)	gi|325494716|gb|ADZ17179.1|	adipokinetic hormone receptor [Gryllus bimaculatus]	0.65	GO:0007165;GO:0004871	_	_	_	_	_	_	None	_
comp155057_c0_seq1	196	2-589(+)	gi|119720786|gb|ABL97963.1|	hydrogen-transporting ATP synthase [Brassica rapa]	0.58	GO:0016043;GO:0006007;GO:0042221;GO:0006091;GO:0055114;GO:0009117;GO:0044763;GO:0016787;GO:0000275;GO:0008270;GO:0009651;GO:0044249;GO:1901564;GO:0044765	_	_	_	_	_	_	K02134	ATPeF1D, ATP5D
comp155174_c0_seq1	193	2-583(+)	gi|160373115|gb|ABX38842.1|	multidrug resistance-associated protein 3 [Squalus acanthias]	0.81	GO:0030241;GO:0005703;GO:0005524;GO:0007427;GO:0006941;GO:0016021;GO:0008307;GO:0007298;GO:0005863;GO:0060361;GO:0045214;GO:0007527;GO:0007517;GO:0031672;GO:0006364;GO:0042803;GO:0005884;GO:0031427;GO:0006200;GO:0000146;GO:0008559;GO:0050821;GO:0006855;GO:0030898	7227.FBpp0089056	Multidrug-Resistance like Protein 1	0.8135	_	KOG0054	_	None	_
comp155283_c0_seq1	227	768-1451(+)	gi|195427603|ref|XP_002061866.1|	GK16960 [Drosophila willistoni]	0.65	GO:0035011	_	_	_	_	_	_	K07868	RHOBTB1_2
comp155332_c0_seq1	137	1-411(+)	gi|189233787|ref|XP_972835.2|	PREDICTED: similar to AGAP007127-PA [Tribolium castaneum]	0.92	GO:0038032	7070.XP_972835	similar to CG5036-PA	0.925	_	KOG3589	_	None	_
comp155332_c0_seq2	116	1-348(+)	gi|189233787|ref|XP_972835.2|	PREDICTED: similar to AGAP007127-PA [Tribolium castaneum]	0.95	GO:0038032	7070.XP_972835	similar to CG5036-PA	0.9495	_	KOG3589	_	None	_
comp155381_c0_seq1	165	2-499(+)	gi|364087500|gb|AEW47001.1|	speedy protein [Branchiostoma floridae]	0.69	GO:0000187;GO:0001556;GO:0051446;GO:0045737;GO:0008315;GO:0006378;GO:0019901	_	_	_	_	_	_	K08694	SPDY, RINGO
comp155650_c0_seq1	226	1-681(+)	gi|194764392|ref|XP_001964314.1|	Fas2 [Drosophila ananassae]	0.59	GO:0001746;GO:0035158;GO:0031594;GO:0005737;GO:0016319;GO:0035159;GO:0005515;GO:0008582;GO:0008038;GO:0042734;GO:0005886;GO:0045211;GO:0042059;GO:0042221;GO:0036062;GO:0048803;GO:0007612;GO:0048667;GO:0014069;GO:0008360;GO:0007156;GO:0072553	_	_	_	_	_	_	K06491	NCAM
comp1558816_c0_seq1	360	_	gi|507111367|emb|CDF35091.1|	isoleucine--tRNA ligase, cytoplasmic [Chondrus crispus]	0.91	GO:0005524;GO:0002161;GO:0009097;GO:0005737;GO:0006450;GO:0004822;GO:0009098;GO:0009099;GO:0046686;GO:0006428	_	_	_	_	_	_	K01870	IARS, ileS
comp155958_c0_seq1	282	1-846(-)	gi|170033274|ref|XP_001844503.1|	dual oxidase 1 [Culex dual oxidase 1 [Culex quinquefasciatus]	0.84	GO:0016174;GO:0020037;GO:0042335;GO:0051591;GO:0055114;GO:0006804;GO:0006979;GO:0005509;GO:0004601;GO:0016021;GO:0019221	_	_	_	_	_	_	K13411	DUOX, THOX
comp1559747_c0_seq1	130	2-394(+)	gi|345481600|ref|XP_001606223.2|	PREDICTED: hypothetical protein LOC100122612 [Nasonia vitripennis]	0.82	GO:0007155;GO:0030246;GO:0016324;GO:0005509;GO:0005112;GO:0045746;GO:0035152;GO:0046716	_	_	_	_	_	_	None	_
comp156231_c0_seq1	233	1-699(-)	gi|321461639|gb|EFX72669.1|	putative neuropeptide G protein-coupled receptor [Daphnia pulex]	0.75	GO:0007186;GO:0004930	_	_	_	_	_	_	None	_
comp156283_c0_seq1	217	93-743(+)	gi|160330975|ref|XP_001712195.1|	gps2 [Hemiselmis andersenii]	0.87	GO:0006886;GO:0006913;GO:0006184;GO:0033009;GO:0007264;GO:0005525;GO:0003924	436907.A7TPD5	hypothetical protein	0.8701	COG1100	KOG0096	_	K07936	RAN
comp156332_c0_seq1	157	3-473(+)	gi|391339070|ref|XP_003743876.1|	PREDICTED: calmodulin-like [Metaseiulus occidentalis]	0.73	GO:0048011;GO:0043274;GO:0072542;GO:0030801;GO:0002576;GO:0051343;GO:0046209;GO:0007173;GO:0008543;GO:0031996;GO:0032465;GO:0005513;GO:0006006;GO:0005980;GO:1901844;GO:0005654;GO:0007202;GO:0060315;GO:0000922;GO:0035307;GO:0030168;GO:0005829;GO:0005576;GO:0060316;GO:0034704;GO:0010881;GO:0005886;GO:0005876;GO:0007186;GO:0031997;GO:0008218;GO:0005813;GO:0032516;GO:0030017;GO:0002027;GO:0044325;GO:…	51511.ENSCSAVP00000019969	annotation not avaliable	0.7676	COG5126	KOG0027	NOG277755	K02183	CALM
comp156764_c0_seq1	219	3-662(+)	gi|242006990|ref|XP_002424325.1|	Diacylglycerol kinase theta, putative [Pediculus humanus corporis]	0.62	GO:0007165;GO:0016740	_	_	_	_	_	_	K00901	E2.7.1.107, DGK, dgkA
comp156806_c0_seq1	292	143-1021(+)	gi|242003222|ref|XP_002436141.1|	phosphatidylinositol transfer protein SEC14, putative [Ixodes scapularis]	0.56	GO:0001892;GO:0090212;GO:0005737;GO:0042360;GO:0009636	_	_	_	_	_	_	None	_
comp156913_c0_seq1	125	153-527(-)	gi|501295465|dbj|BAN20875.1|	conserved hypothetical protein [Riptortus pedestris]	0.83	GO:0030111	7070.XP_969599	similar to CG3402-PA	0.8522	_	KOG3553	_	None	_
comp156957_c0_seq1	148	1-447(+)	gi|315319167|gb|ADU04569.1|	protein kinase C1 [Plutella xylostella]	0.8	GO:0005524;GO:0009069;GO:0008270;GO:0006468;GO:0004697;GO:0035556	7739.JGI88030	hypothetical protein	0.7939	_	KOG0696	_	K02677	CPKC
comp156957_c0_seq2	150	1-450(+)	gi|315319167|gb|ADU04569.1|	protein kinase C1 [Plutella xylostella]	0.78	GO:0042393;GO:0050853;GO:0045941;GO:0035403;GO:0000785;GO:0030374;GO:0035408;GO:0043123;GO:0006357;GO:0046872;GO:0050681;GO:0005667;GO:0003682;GO:0000166;GO:0042113	_	_	_	_	_	_	K02677	CPKC
comp157065_c0_seq1	213	3-644(+)	gi|195132649|ref|XP_002010755.1|	GI21529 [Drosophila mojavensis]	0.76	GO:0050995;GO:0003677;GO:0006641;GO:0005886;GO:0046889;GO:0046513;GO:0032933	7227.FBpp0070899	Longevity assurance gene 1	0.7784	COG5058	KOG1607	_	K04710	CERS
comp157430_c0_seq1	311	422-1354(-)	gi|71005694|ref|XP_757513.1|	hypothetical protein UM01366.1 [Ustilago maydis 521]	0.64	GO:0005634;GO:0031146;GO:0010265;GO:0044444;GO:0005488;GO:0019005;GO:0009740	_	_	_	_	_	_	K06630	YWHA
comp157727_c0_seq1	285	1-858(+)	gi|41055188|ref|NP_956749.1|	uncharacterized protein LOC393427 [Danio rerio]	0.59	GO:0031100;GO:0046186;GO:0006069;GO:0042572;GO:0051287;GO:0032570;GO:0035276;GO:0004022;GO:0008144;GO:0005829;GO:0004745;GO:0009790	_	_	_	_	_	_	K13951	ADH1_7
comp157812_c0_seq1	129	67-453(-)	gi|77166828|gb|ABA62390.1|	phospholipid-hydroperoxide glutathione peroxidase [Rhipicephalus microplus]	0.73	GO:0006979;GO:0006804;GO:0004601	326423.RBAM_020040	BsaA	0.7568	COG0386	_	_	K00432	E1.11.1.9
comp1580238_c0_seq1	131	1-396(+)	gi|148298728|ref|NP_001091830.1|	nicotinic acetylcholine receptor subunit alpha 6 isoform 3 precursor [Bombyx mori]	0.86	GO:0004889;GO:0007165;GO:0016021;GO:0030054;GO:0006812;GO:0005886;GO:0045211	_	_	_	_	_	_	None	_
comp158051_c0_seq1	118	156-512(+)	gi|341892853|gb|EGT48788.1|	hypothetical protein CAEBREN_08571 [Caenorhabditis brenneri]	0.55	GO:0010033	_	_	_	_	_	_	None	_
comp15809_c0_seq1	134	1-405(+)	gi|328724634|ref|XP_001948241.2|	PREDICTED: 1-phosphatidylinositol-4,5-bisphosphate phosphodiesterase-like isoform 1 [Acyrthosiphon pisum]	0.96	GO:0009395;GO:0004435;GO:0005509;GO:0007242;GO:0004871;GO:0035556;GO:0046339	_	_	_	_	_	_	K05858	PLCB
comp158288_c0_seq1	1279	_	gi|291238799|ref|XP_002739315.1|	PREDICTED: non-specific serine/threonine protein kinase-like [Saccoglossus kowalevskii]	0.79	GO:0061179;GO:0005524;GO:0007346;GO:0009069;GO:0006468;GO:0043066;GO:0005515;GO:0004674	28377.ENSACAP00000008806	pim-3 oncogene	0.7923	COG0515	KOG0583	_	K08807	PIM3
comp158401_c0_seq1	175	2-529(+)	gi|41055552|ref|NP_957226.1|	5'-nucleotidase precursor [Danio 5'-nucleotidase, ecto (CD73) [Danio rerio]	0.59	GO:0046688	_	_	_	_	_	_	K01081	E3.1.3.5
comp158734_c0_seq1	232	2-700(+)	gi|270003746|gb|EFA00194.1|	hypothetical protein TcasGA2_TC003019 [Tribolium castaneum]	0.82	GO:0005524;GO:0009069;GO:0008270;GO:0006468;GO:0004697;GO:0035556	7425.XP_001601074	similar to conventional protein kinase C	0.8646	COG0515	KOG0696	_	K02677	CPKC
comp15875_c0_seq1	263	2-793(+)	gi|47211756|emb|CAG06237.1|	unnamed protein product [Tetraodon nigroviridis]	0.71	GO:0048593;GO:0031571;GO:0000082;GO:0051726	_	_	_	_	_	_	K04503	CCND1
comp158826_c0_seq1	137	96-509(+)	gi|321458840|gb|EFX69901.1|	hypothetical protein DAPPUDRAFT_228516 [Daphnia pulex]	0.77	GO:0050794;GO:0042995;GO:0016043;GO:0051716;GO:0005524;GO:0031090;GO:0003774;GO:0016023;GO:0012505;GO:0071702;GO:0048839;GO:0005654;GO:0030182;GO:0051649;GO:0003779;GO:0016459;GO:0097458;GO:0007268;GO:0046903	_	_	_	_	_	_	K10358	MYO6
comp159084_c0_seq1	709	3-2129(+)	gi|345318624|ref|XP_001521465.2|	PREDICTED: phosphatidylinositol-glycan-specific phospholipase D, partial [Ornithorhynchus anatinus]	0.66	GO:0044700;GO:0044707;GO:0005615;GO:0046486;GO:0080090;GO:0044424;GO:0071277;GO:0004621;GO:0009395;GO:0071282;GO:0007154;GO:0032879;GO:0031325;GO:0048583;GO:0032869;GO:0044765	_	_	_	_	_	_	K01127	E3.1.4.50
comp1593768_c0_seq1	141	3-428(+)	gi|507637104|ref|XP_004700589.1|	PREDICTED: prolow-density lipoprotein receptor-related protein 1 [Echinops telfairi]	0.64	GO:0010875;GO:0008203;GO:0097242;GO:0030178;GO:0034185;GO:0032956;GO:0035909;GO:2000587;GO:0005887;GO:0032429;GO:0015031;GO:0043231;GO:0070325;GO:0004872;GO:0043277;GO:0014912;GO:0005509;GO:0006898;GO:0097458;GO:0044444;GO:0032403	_	_	_	_	_	_	K04550	LRP1, CD91
comp159388_c0_seq1	267	1-801(-)	gi|148762965|ref|NP_001092087.1|	nuclear receptor subfamily 1 group I member 2 [Danio rerio]	0.64	GO:0003707;GO:0006357;GO:0007165;GO:0004879;GO:0005488	_	_	_	_	_	_	K08540	NR1I2, PXR
comp1594766_c0_seq1	122	3-368(-)	gi|321457604|gb|EFX68687.1|	hypothetical protein DAPPUDRAFT_301267 [Daphnia pulex]	0.69	GO:0007355;GO:0045892;GO:0009887;GO:0048522;GO:0004672;GO:0016055;GO:0005488	_	_	_	_	_	_	K05122	ROR1, NTRKR1
comp1595377_c0_seq1	181	3-545(-)	gi|322802014|gb|EFZ22551.1|	hypothetical protein SINV_10466 [Solenopsis invicta]	0.79	GO:0046872;GO:0004114;GO:0007165;GO:0006144	_	_	_	_	_	_	K13755	PDE1
comp1595699_c0_seq1	182	2-547(-)	gi|326931275|ref|XP_003211758.1|	PREDICTED: phosphorylase b kinase gamma catalytic chain, skeletal muscle isoform-like [Meleagris gallopavo]	0.55	GO:0030335;GO:0071476;GO:0005515;GO:0005829;GO:0004687;GO:0005886;GO:0032060;GO:0006468;GO:0006939;GO:0009069;GO:0060414;GO:0030027;GO:0090303;GO:0001725;GO:0032154;GO:0016459;GO:0051928	_	_	_	_	_	_	K00871	E2.7.11.19, PHKG
comp159625_c0_seq1	255	3-770(+)	gi|401829|emb|CAA81135.1|	heat shock protein [Eimeria acervulina]	0.87	GO:0032440;GO:0005524;GO:0006950;GO:0055114	_	_	_	_	_	_	K03283	HSPA1_8
comp159707_c0_seq1	149	1-447(-)	gi|328719064|ref|XP_001948643.2|	PREDICTED: pancreatic triacylglycerol lipase-like [Acyrthosiphon pisum]	0.69	GO:0016042;GO:0044707;GO:0052689;GO:0010033;GO:0005576;GO:0016298	_	_	_	_	_	_	K14073	PNLIP, PL
comp159854_c0_seq1	156	2-469(+)	gi|441494178|gb|AGC50803.1|	copper/zinc superoxide dismutase [Carassius auratus ssp. 'Pengze']	0.59	GO:0006801;GO:0004784;GO:0009410;GO:0005737;GO:0046872;GO:0051597;GO:0070050;GO:0010038	_	_	_	_	_	_	K04565	E1.15.1.1C, sodC, SOD1
comp160179_c0_seq1	239	2-718(-)	gi|24651709|ref|NP_733446.1|	tramtrack, isoform D [Drosophila tramtrack, isoform F [Drosophila melanogaster]	0.62	GO:0007426;GO:0048750;GO:0035147;GO:0035001;GO:0046843;GO:0035151;GO:0005700;GO:0031987;GO:0017053;GO:0002121;GO:0003682;GO:0007298;GO:0045467;GO:0045892;GO:0001709;GO:0040003;GO:0001964;GO:0000978;GO:0000785;GO:0048854;GO:0042803;GO:0001078;GO:0048813;GO:0007476;GO:0048053;GO:0016476;GO:0045944;GO:0042675;GO:0007422;GO:0000980	_	_	_	_	_	_	K09237	K09237
comp160179_c0_seq2	203	3-611(-)	gi|24651709|ref|NP_733446.1|	tramtrack, isoform D [Drosophila tramtrack, isoform F [Drosophila melanogaster]	0.62	GO:0007426;GO:0048750;GO:0035147;GO:0035001;GO:0046843;GO:0035151;GO:0005700;GO:0031987;GO:0017053;GO:0002121;GO:0003682;GO:0007298;GO:0045467;GO:0045892;GO:0001709;GO:0040003;GO:0001964;GO:0000978;GO:0000785;GO:0048854;GO:0042803;GO:0001078;GO:0048813;GO:0007476;GO:0048053;GO:0016476;GO:0045944;GO:0042675;GO:0007422;GO:0000980	_	_	_	_	_	_	K09237	K09237
comp160617_c0_seq1	403	311-1519(+)	gi|291486753|dbj|BAI87826.1|	c-jun N-terminal kinase [Marsupenaeus japonicus]	0.95	GO:0000165;GO:0005524;GO:0009069;GO:0006468;GO:0007178;GO:0004707	7176.CPIJ001158-PA	jnk	0.9342	COG0515	KOG0665	_	K04440	JNK
comp160687_c0_seq1	418	33-1286(-)	gi|193716181|ref|XP_001946337.1|	PREDICTED: tachykinin-like peptides receptor 99D-like [Acyrthosiphon pisum]	0.7	GO:0007165;GO:0048477;GO:0004888;GO:0006915;GO:0009792	_	_	_	_	_	_	K14071	LKR
comp160815_c0_seq1	1006	_	gi|115473289|ref|NP_001060243.1|	Os07g0608500 [Oryza sativa Japonica Group]	0.85	GO:0003723;GO:0015935;GO:0005773;GO:0042254;GO:0005730;GO:0009651;GO:0006412;GO:0003735;GO:0005886;GO:0022626;GO:0009507	39946.BGIOSIBCE025566	Os07g0608500	0.8502	COG0092	KOG3181	_	K02985	RP-S3e, RPS3
comp160911_c0_seq1	791	2-2374(+)	gi|345489068|ref|XP_001603534.2|	PREDICTED: rap guanine nucleotide exchange factor 6-like isoform 1 [Nasonia vitripennis]	0.78	GO:0043087;GO:0005622;GO:0005085;GO:0051056	_	_	_	_	_	_	K08018	RAPGEF2, PDZGEF1
comp16151_c0_seq1	230	2-691(-)	gi|196006375|ref|XP_002113054.1|	hypothetical protein TRIADDRAFT_56826 [Trichoplax adhaerens]	0.94	GO:0009952;GO:0016939;GO:0007018;GO:0007368;GO:0001822;GO:0005524;GO:0032391;GO:0007507;GO:0021904;GO:0005813;GO:0001701;GO:0042384;GO:0003777;GO:0007224;GO:0005876	10228.JGI56826	hypothetical protein	0.9391	COG5059	KOG4280	_	K10394	KIF3_17
comp161695_c0_seq1	384	109-1260(-)	gi|470103159|ref|XP_004288011.1|	PREDICTED: U1 small nuclear ribonucleoprotein A-like [Fragaria vesca subsp. vesca]	0.47	GO:0044260;GO:0003723;GO:0090100;GO:0031323;GO:0080090;GO:0060255	_	_	_	_	_	_	None	_
comp162005_c0_seq1	345	245-1279(-)	gi|292618490|ref|XP_002663678.1|	PREDICTED: trace amine-associated receptor 6-like [Danio rerio]	0.52	GO:0007186;GO:0016021;GO:0014827;GO:0004871;GO:0005886;GO:0050877	_	_	_	_	_	_	K05051	TAAR
comp162078_c0_seq1	244	1-732(-)	gi|91081589|ref|XP_975344.1|	PREDICTED: similar to AGAP011940-PA [Tribolium castaneum]	0.63	GO:0007165;GO:0044238;GO:0071704	_	_	_	_	_	_	K12350	SMPD1, ASM
comp162136_c0_seq1	126	1-378(-)	gi|225454979|ref|XP_002278113.1|	PREDICTED: structural maintenance of chromosomes protein 6-like [Vitis vinifera]	0.69	GO:0006281;GO:0044446	_	_	_	_	_	_	None	_
comp162175_c0_seq1	336	184-1191(-)	gi|260816102|ref|XP_002602811.1|	hypothetical protein BRAFLDRAFT_273255 [Branchiostoma floridae]	0.78	GO:0061179;GO:0007346;GO:0009069;GO:0006468;GO:0043066;GO:0005515;GO:0004674;GO:0000166	7739.JGI273255	hypothetical protein	0.7804	COG0515	KOG0583	_	K04702	PIM1
comp162458_c0_seq1	139	3-422(+)	gi|459180081|ref|XP_002122318.2|	PREDICTED: uncharacterized protein LOC100180679 [Ciona intestinalis]	0.64	GO:0007155;GO:0016477;GO:0097367;GO:0002376;GO:0031256;GO:0007166;GO:0043167	_	_	_	_	_	_	K08446	CD97
comp162648_c0_seq1	477	3-1433(+)	gi|290463015|gb|ADD24555.1|	TNF receptor-associated factor 6 [Lepeophtheirus salmonis]	0.71	GO:0030154;GO:0048513;GO:0016567;GO:0010740;GO:0007166;GO:0044767;GO:0071310;GO:0046872;GO:0002682;GO:0071902	_	_	_	_	_	_	K03175	TRAF6
comp162671_c0_seq1	98	69-362(-)	gi|241631815|ref|XP_002410284.1|	conserved hypothetical protein [Ixodes scapularis]	0.74	GO:0006281	6945.ISCW020043-PA	conserved hypothetical protein	0.7833	_	KOG4161	_	K10801	MBD4
comp1628088_c0_seq1	153	3-461(-)	gi|350403301|ref|XP_003486761.1|	PREDICTED: hypothetical protein LOC100743777 [Bombus impatiens]	0.63	GO:0016310;GO:0004713;GO:0007165;GO:0000166;GO:0004888	_	_	_	_	_	_	None	_
comp1631954_c0_seq1	144	2-433(-)	gi|328719612|ref|XP_001946943.2|	PREDICTED: protein toll-like [Acyrthosiphon pisum]	0.56	GO:0050896	_	_	_	_	_	_	None	_
comp163682_c0_seq1	317	1-954(+)	gi|321478847|gb|EFX89804.1|	hypothetical protein DAPPUDRAFT_303110 [Daphnia pulex]	0.75	GO:0003707;GO:0006355;GO:0005667;GO:0008270;GO:0043565;GO:0043401;GO:0003700;GO:0045449	7070.XP_968487	hormone receptor in 96-like protein	0.7848	_	KOG3575	_	K14035	NR1IN
comp163801_c0_seq1	365	_	gi|17557250|ref|NP_504107.1|	Protein NLP-31 [Caenorhabditis NLP31_CAEEL RecName: Full=Neuropeptide-like protein 31; Contains: RecName: Full=QWGYGGY-amide; Contains: R	0.84	GO:0050832;GO:0016021;GO:0042742;GO:0045087	_	_	_	_	_	_	None	_
comp163882_c0_seq1	278	952-1785(-)	gi|363987164|dbj|BAL41704.1|	scalloped [Thermobia domestica]	0.83	GO:0035329;GO:0005667;GO:0006355;GO:0045449;GO:0003700	7425.XP_001601555	similar to Transcriptional enhancer factor TEF-1 (TEA domain family member 1) (TEAD-1) (Prot [...]	0.8289	_	KOG3841	_	K09448	TEAD1_3_4
comp163882_c0_seq2	226	952-1629(-)	gi|363987164|dbj|BAL41704.1|	scalloped [Thermobia domestica]	0.92	GO:0035329;GO:0005667;GO:0006355;GO:0045449;GO:0003700	7425.XP_001601555	similar to Transcriptional enhancer factor TEF-1 (TEA domain family member 1) (TEAD-1) (Prot [...]	0.9099	_	KOG3841	_	K09448	TEAD1_3_4
comp163882_c0_seq3	386	_	gi|328713419|ref|XP_001950204.2|	PREDICTED: transcriptional enhancer factor TEF-1-like isoform 1 [Acyrthosiphon pisum]	0.96	GO:0035329;GO:0005667;GO:0006355;GO:0045449;GO:0003700	_	_	_	_	_	_	K09448	TEAD1_3_4
comp164003_c0_seq1	192	2-577(-)	gi|156376906|ref|XP_001630599.1|	predicted protein [Nematostella predicted protein [Nematostella vectensis]	0.78	GO:0021799;GO:0048011;GO:0032587;GO:0019901;GO:0045216;GO:0060263;GO:0097178;GO:0010310;GO:0051668;GO:0031996;GO:0017137;GO:0007411;GO:0021831;GO:0034446;GO:0006184;GO:0050690;GO:0071542;GO:0043652;GO:0045740;GO:0001891;GO:0030027;GO:0016032;GO:0003924;GO:0002551;GO:0006915;GO:0043552;GO:0007160;GO:0010592;GO:0035025;GO:0005525;GO:0030742;GO:0042470;GO:0030168;GO:0031295;GO:0090103;GO:0019897;GO:…	45351.JGI244319	hypothetical protein	0.7765	COG1100	KOG0393	_	K04392	RAC1
comp16436_c0_seq1	191	2-577(+)	gi|380024739|ref|XP_003696149.1|	PREDICTED: serine/threonine-protein kinase Doa-like [Apis florea]	0.66	GO:0005783;GO:0000381;GO:0007350;GO:0031987;GO:0005875;GO:0000166;GO:0001964;GO:0000165;GO:0005634;GO:0048854;GO:0009069;GO:0035071;GO:0046777;GO:0009306;GO:0007548;GO:0004674;GO:0030717;GO:0042051	7165.AGAP003663-PA	AGAP003663-PA	0.7736	_	KOG0671	_	K08823	CLK
comp16438_c0_seq1	133	2-403(+)	gi|432960939|ref|XP_004086503.1|	PREDICTED: LOW QUALITY PROTEIN: death-associated protein kinase 1-like [Oryzias latipes]	0.77	GO:0043229;GO:0005524;GO:0043276;GO:0042802;GO:0006468;GO:0005737;GO:0007243;GO:0004672;GO:0006917;GO:0005516	8090.ENSORLP00000025759	death-associated protein kinase 1	0.7826	COG0515	_	_	K08803	DAPK
comp164485_c0_seq1	368	2-1105(+)	gi|91078574|ref|XP_971674.1|	PREDICTED: similar to pipsqueak [Tribolium castaneum]	0.76	GO:0007476;GO:0031519;GO:0007315;GO:0043565;GO:0042048;GO:0031935	_	_	_	_	_	_	None	_
comp1645041_c0_seq1	122	1-369(+)	gi|332018938|gb|EGI59484.1|	Serine/threonine-protein kinase ICK [Acromyrmex echinatior]	0.95	GO:0007243;GO:0000287;GO:0043231;GO:0004674;GO:0005524;GO:0009069;GO:0006468	_	_	_	_	_	_	K08829	MAK
comp164548_c0_seq1	296	1-888(+)	gi|322793995|gb|EFZ17233.1|	hypothetical protein SINV_00485 [Solenopsis invicta]	0.69	GO:0016020;GO:0005634;GO:0030246;GO:0008045;GO:0005581;GO:0005739	_	_	_	_	_	_	None	_
comp164670_c0_seq1	165	198-695(+)	gi|405953383|gb|EKC21057.1|	ADP-ribosylation factor-like protein 6 [Crassostrea gigas]	0.94	GO:0016020;GO:0005737;GO:0055114;GO:0003676;GO:0042384;GO:0045444;GO:0007264;GO:0016055;GO:0005525;GO:0016491	7425.XP_001599141	similar to ADP-ribosylation factor, putative	0.9231	COG1100	KOG0070	_	K07951	ARL6
comp164675_c0_seq3	149	1-450(+)	gi|195449337|ref|XP_002072030.1|	GK22538 [Drosophila willistoni]	0.59	GO:0016338;GO:0050839;GO:0008038;GO:0007156;GO:0007411;GO:0005886	_	_	_	_	_	_	None	_
comp164675_c0_seq4	175	3-530(+)	gi|195053346|ref|XP_001993587.1|	GH20264 [Drosophila grimshawi]	0.58	GO:0016338;GO:0050839;GO:0008038;GO:0007156;GO:0007411;GO:0005886	_	_	_	_	_	_	None	_
comp164746_c0_seq1	121	39-401(+)	gi|410927954|ref|XP_003977405.1|	PREDICTED: transcription elongation factor B polypeptide 1-like [Takifugu rubripes]	0.95	GO:0005840;GO:0005654;GO:0030891;GO:0006448;GO:0050434;GO:0016567;GO:0003746;GO:0004842;GO:0032968;GO:0006511;GO:0005829;GO:0061418;GO:0019048;GO:0032403	8090.ENSORLP00000009909	transcription elongation factor B (SIII), polypeptide 1 (15kDa, elongin C)	0.9464	_	KOG3473	_	K03872	TCEB1
comp164823_c0_seq1	255	2-769(+)	gi|321477580|gb|EFX88538.1|	hypothetical protein DAPPUDRAFT_191008 [Daphnia pulex]	0.81	GO:0004715;GO:0005524;GO:0007216;GO:0006468;GO:0004965;GO:0007169;GO:0016021;GO:0004714	7070.XP_972014	venus kinase receptor	0.8472	COG0515	KOG4258	_	None	_
comp16488_c0_seq1	221	3-668(+)	gi|507978455|ref|XP_004693120.1|	PREDICTED: E3 ubiquitin-protein ligase HERC2 [Condylura cristata]	0.93	GO:0005634;GO:0020037;GO:0006281;GO:0016567;GO:0031625;GO:0007283;GO:0004842;GO:0008270;GO:0005743;GO:0032183	9615.ENSCAFP00000014527	hect domain and RLD 2	0.9269	COG5184	_	_	K10595	HERC2
comp1649638_c0_seq1	131	2-397(+)	gi|170059514|ref|XP_001865396.1|	tenascin [Culex tenascin [Culex quinquefasciatus]	0.69	GO:0042023;GO:0001077;GO:0019730;GO:0040005;GO:0060537;GO:0000122;GO:0007113;GO:0043565;GO:0031012;GO:0035206;GO:0008630;GO:0031523;GO:0007475;GO:0008362;GO:0046331;GO:0008069;GO:0045850;GO:0048813;GO:0035189;GO:0007424;GO:0007307;GO:0045944;GO:0000082;GO:0051726;GO:0008134	_	_	_	_	_	_	None	_
comp16504_c0_seq1	214	44-685(-)	gi|405962693|gb|EKC28344.1|	Cyclic nucleotide-gated olfactory channel [Crassostrea gigas]	0.88	GO:0030552;GO:0016310;GO:0055085;GO:0009069;GO:0006812;GO:0007601;GO:0017071;GO:0001750;GO:0050896;GO:0004692;GO:0005221;GO:0005886;GO:0046549	_	_	_	_	_	_	K04950	CNGA3
comp165072_c0_seq1	1108	3-3326(+)	gi|189237416|ref|XP_001815363.1|	PREDICTED: similar to AGAP006590-PD [Tribolium castaneum]	0.9	GO:0043087;GO:0005057;GO:0005622;GO:0035023;GO:0005543;GO:0005089	_	_	_	_	_	_	K05731	TIAM
comp165111_c0_seq1	375	111-1238(+)	gi|328792058|ref|XP_396918.4|	PREDICTED: nuclear hormone receptor FTZ-F1 beta [Apis mellifera]	0.56	GO:0003707;GO:0006355;GO:0005667;GO:0008270;GO:0043565;GO:0043401;GO:0003700;GO:0045449	_	_	_	_	_	_	K08705	NR5A3, ftz-f1
comp165230_c0_seq1	274	522-1343(+)	gi|213513053|ref|NP_001134412.1|	Twist-related protein 2 [Salmo Twist-related protein 2 [Salmo salar]	0.66	GO:0051093;GO:0033554;GO:0006355;GO:0014031;GO:0001503;GO:0043009;GO:0046983;GO:0003007;GO:0048522;GO:0048585;GO:0031324;GO:0003170;GO:0010605;GO:0030326;GO:0065009;GO:0001817;GO:0051128;GO:0051179;GO:2000026;GO:0045595	8090.ENSORLP00000009097	Basic helix-loop-helix transcription factor twist	0.7609	_	KOG4447	_	K09069	TWIST
comp165299_c0_seq1	207	106-726(+)	gi|225713578|gb|ACO12635.1|	Ras-related protein Rab-30 [Lepeophtheirus salmonis]	0.89	GO:0007264;GO:0005525;GO:0015031	7070.XP_970787	similar to Rab30 CG9100-PB	0.8838	COG1100	KOG0095	_	K07917	RAB30
comp1653640_c0_seq1	126	2-382(+)	gi|498971691|ref|XP_004527126.1|	PREDICTED: sn1-specific diacylglycerol lipase alpha-like [Ceratitis capitata]	0.75	GO:0016042;GO:0007602;GO:0046486;GO:0004465;GO:0005737	_	_	_	_	_	_	K13806	DAGL
comp165409_c0_seq1	195	1-585(-)	gi|391341207|ref|XP_003744922.1|	PREDICTED: mitogen-activated protein kinase 1-like [Metaseiulus occidentalis]	0.87	GO:0000165;GO:0005524;GO:0009069;GO:0006468;GO:0007178;GO:0004707	_	_	_	_	_	_	K04371	ERK1_2
comp165451_c0_seq1	168	1-507(+)	gi|380025174|ref|XP_003696353.1|	PREDICTED: cdc42 homolog [Apis florea]	0.81	GO:0016020;GO:0007264;GO:0005622;GO:0005525	7460.XP_394608	Cdc42 homolog	0.8101	COG1100	KOG0393	_	K04393	CDC42
comp165725_c0_seq1	433	463-1761(-)	gi|224062830|ref|XP_002198171.1|	PREDICTED: mothers against decapentaplegic homolog 6 [Taeniopygia guttata]	0.61	GO:0005634;GO:0019222;GO:0005515;GO:0090101	_	_	_	_	_	_	K04677	SMAD6_7
comp165725_c0_seq2	1334	_	gi|449270654|gb|EMC81313.1|	Mothers against decapentaplegic like protein 6, partial [Columba livia]	0.69	GO:0005634;GO:0000785;GO:0006355;GO:0031589;GO:0044212;GO:0007179;GO:0003682;GO:0090101;GO:0046332	_	_	_	_	_	_	K04677	SMAD6_7
comp1657504_c0_seq1	160	2-484(+)	gi|385304490|gb|EIF48505.1|	monothiol glutaredoxin-3 [Dekkera bruxellensis AWRI1499]	0.66	GO:0009926;GO:0005829;GO:0072593;GO:0051726;GO:0009408;GO:0006996	4952.Q6CES4	YALI0B13398p	0.8462	COG0278	_	_	None	_
comp165785_c0_seq1	242	103-831(+)	gi|260804933|ref|XP_002597342.1|	hypothetical protein BRAFLDRAFT_118197 [Branchiostoma floridae]	0.77	GO:0016020;GO:0030259;GO:0045746;GO:2000460	7739.JGI118197	hypothetical protein	0.7712	_	KOG1442	_	K15279	SLC35C1, FUCT1
comp165815_c0_seq1	184	84-638(+)	gi|291228422|ref|XP_002734175.1|	PREDICTED: Di-Ras2-like isoform 1 [Saccoglossus kowalevskii]	0.85	GO:0006184;GO:0007264;GO:0005525;GO:0005886;GO:0003924	13616.ENSMODP00000032221	DIRAS family, GTP-binding RAS-like 1	0.8693	COG1100	KOG0395	_	K07974	RAS
comp165964_c0_seq1	318	184-1137(-)	gi|348572908|ref|XP_003472234.1|	PREDICTED: guanine nucleotide-binding protein subunit beta-2-like 1-like [Cavia porcellus]	0.83	GO:0030425;GO:0030335;GO:0008303;GO:0008200;GO:0019903;GO:0032436;GO:0015935;GO:0043065;GO:0017148;GO:0050765;GO:0051898;GO:0005856;GO:0001525;GO:0001891;GO:0061099;GO:0048471;GO:0090003;GO:0006919;GO:0051726;GO:0030292;GO:0030178;GO:0043547;GO:0030496;GO:0001934;GO:2000543;GO:0030308;GO:0005634;GO:0008656;GO:0032464;GO:0060027;GO:0051302;GO:0030971;GO:0048511;GO:0042169;GO:0043204;GO:2000114;GO:…	9913.ENSBTAP00000026183	Guanine nucleotide-binding protein subunit beta-2-like 1 (Receptor of activated protein kina [...]	0.8307	COG2319	KOG0279	_	K14753	RACK1
comp166044_c0_seq1	464	1-1392(+)	gi|242024461|ref|XP_002432646.1|	tyrosine kinase receptor, putative [Pediculus humanus corporis]	0.86	GO:0007169;GO:0005524;GO:0005509;GO:0007156;GO:0016021;GO:0006468;GO:0004714	7070.XP_971319	similar to AGAP011648-PA	0.8795	COG0515	KOG0200	_	None	_
comp166121_c0_seq1	56	2-169(-)	gi|13124701|sp|Q01295.2|BRC1_DROME	RecName: Full=Broad-complex core protein isoforms 1/2/3/4/5	0.84	GO:0046847;GO:0048747;GO:0003136;GO:0006914;GO:0035170;GO:0005769;GO:0048190;GO:0045599;GO:0008544;GO:0001752;GO:0000977;GO:0045944;GO:0005771;GO:0008595;GO:0043499;GO:0030032;GO:0040034;GO:0035288;GO:0009608;GO:0007394;GO:0061320;GO:0061332;GO:0000122;GO:0061331;GO:0046672;GO:0035263;GO:0007223;GO:0005886;GO:0042691;GO:0030917;GO:0007479;GO:0007446;GO:0014019;GO:0060914;GO:0005112;GO:0035017;GO:…	_	_	_	_	_	_	K02174	BR-C
comp166148_c0_seq1	389	2-1171(+)	gi|242024523|ref|XP_002432677.1|	pdz domain containing guanine nucleotide exchange factor, pdz-gef, putative [Pediculus humanus pdz domain containing guanine nuc	0.84	GO:0043087;GO:0005622;GO:0005085;GO:0051056	6945.ISCW014925-PA	pdz domain-containing guanine nucleotide exchange factor, pdz-gef, putative	0.8295	_	KOG3542	_	K08018	RAPGEF2, PDZGEF1
comp166300_c0_seq2	107	521-841(-)	gi|145207988|ref|NP_001077396.1|	transducin-like enhancer protein 3 isoform 1 [Mus musculus]	0.97	GO:0005654;GO:0006355;GO:0030099;GO:0007283;GO:0009887;GO:0005515;GO:0016055;GO:0007219	9258.ENSOANP00000028015	annotation not avaliable	0.9717	_	KOG0639	_	None	_
comp166335_c0_seq1	273	2-820(+)	gi|260802532|ref|XP_002596146.1|	hypothetical protein BRAFLDRAFT_66125 [Branchiostoma floridae]	0.59	GO:0033339;GO:0021979;GO:1900052;GO:0048732;GO:0048747;GO:0002521;GO:0006357;GO:0046649;GO:0005515;GO:0005667;GO:0001818;GO:0043565;GO:0001756;GO:0003700;GO:0000904;GO:0060784;GO:0048922;GO:0001755;GO:0001525;GO:0021879;GO:0048729;GO:0010628;GO:0033336;GO:0044212;GO:0031101;GO:0060070;GO:0050769;GO:0045449;GO:0048598;GO:0042981	7460.XP_001122393	pangolin	0.819	_	KOG3248	_	K04491	TCF7L2
comp166335_c0_seq2	469	1-1407(+)	gi|328777620|ref|XP_001122393.2|	PREDICTED: LOW QUALITY PROTEIN: hypothetical protein LOC726671 [Apis mellifera]	0.58	GO:0072091;GO:0030178;GO:0001077;GO:0007500;GO:0003705;GO:0005875;GO:0045610;GO:0005667;GO:0019900;GO:0043565;GO:0007367;GO:0045892;GO:0035277;GO:0007507;GO:0070491;GO:0016342;GO:0007476;GO:0060070;GO:0007435;GO:0045944;GO:0008013	7176.CPIJ013913-PA	pangolin	0.8615	_	KOG3248	_	K04491	TCF7L2
comp166335_c0_seq3	295	1-885(+)	gi|260802532|ref|XP_002596146.1|	hypothetical protein BRAFLDRAFT_66125 [Branchiostoma floridae]	0.59	GO:0033339;GO:0021979;GO:1900052;GO:0048732;GO:0048747;GO:0002521;GO:0006357;GO:0046649;GO:0005515;GO:0005667;GO:0001818;GO:0043565;GO:0001756;GO:0003700;GO:0000904;GO:0060784;GO:0048922;GO:0001755;GO:0001525;GO:0021879;GO:0048729;GO:0010628;GO:0033336;GO:0044212;GO:0031101;GO:0060070;GO:0050769;GO:0045449;GO:0048598;GO:0042981	7460.XP_001122393	pangolin	0.819	_	KOG3248	_	K04491	TCF7L2
comp166335_c0_seq4	447	2-1342(+)	gi|328777620|ref|XP_001122393.2|	PREDICTED: LOW QUALITY PROTEIN: hypothetical protein LOC726671 [Apis mellifera]	0.58	GO:0072091;GO:0030178;GO:0001077;GO:0007500;GO:0003705;GO:0005875;GO:0045610;GO:0005667;GO:0019900;GO:0043565;GO:0007367;GO:0045892;GO:0035277;GO:0007507;GO:0070491;GO:0016342;GO:0007476;GO:0060070;GO:0007435;GO:0045944;GO:0008013	7176.CPIJ013913-PA	pangolin	0.8615	_	KOG3248	_	K04491	TCF7L2
comp166337_c0_seq1	468	1-1407(+)	gi|478256471|gb|ENN76656.1|	hypothetical protein YQE_06835, partial [Dendroctonus ponderosae]	0.56	GO:0016338;GO:0050839;GO:0008038;GO:0007156;GO:0007411;GO:0005886	_	_	_	_	_	_	None	_
comp166340_c0_seq1	645	2-1939(+)	gi|196000494|ref|XP_002110115.1|	hypothetical protein TRIADDRAFT_20496 [Trichoplax adhaerens]	0.72	GO:0005783;GO:0097190;GO:0048011;GO:0090330;GO:0035408;GO:0050796;GO:0002159;GO:0006112;GO:0007173;GO:0070555;GO:0008543;GO:0045766;GO:0045651;GO:0005654;GO:0048471;GO:0007202;GO:0043536;GO:0035403;GO:0045785;GO:0031666;GO:2000707;GO:0001932;GO:0007194;GO:0005829;GO:0000166;GO:0001938;GO:0005886;GO:0009069;GO:0045931;GO:0004697;GO:0034351;GO:0010613;GO:0046872;GO:0007190;GO:0010467;GO:0007268;GO:…	_	_	_	_	_	_	K02677	CPKC
comp166435_c0_seq1	579	1-1737(-)	gi|72001018|ref|NP_505639.2|	Protein NHR-232 [Caenorhabditis Protein NHR-232 [Caenorhabditis elegans]	0.6	GO:0006970;GO:0005488;GO:0009792;GO:0009886	_	_	_	_	_	_	None	_
comp166575_c0_seq1	424	1-1272(-)	gi|338723599|ref|XP_001916846.2|	PREDICTED: LOW QUALITY PROTEIN: RE1-silencing transcription factor-like [Equus caballus]	0.47	GO:0005634;GO:0051716;GO:0006355;GO:0010629;GO:0048731;GO:0044767;GO:0044212;GO:0010817;GO:0048522;GO:0010558;GO:0031327;GO:0045596;GO:0051253	_	_	_	_	_	_	K09222	REST
comp166589_c0_seq1	362	388-1473(-)	gi|91076862|ref|XP_974945.1|	PREDICTED: similar to elbow [Tribolium castaneum]	0.48	GO:0007610;GO:0016070;GO:0010468;GO:0005737;GO:0035214;GO:0005488	_	_	_	_	_	_	None	_
comp166835_c0_seq1	566	115-1812(-)	gi|195058544|ref|XP_001995462.1|	GH17761 [Drosophila grimshawi]	0.74	GO:0007608;GO:0005388;GO:0006816;GO:0016059;GO:0045494;GO:0016529;GO:0035091;GO:0005887;GO:0046488;GO:0015914;GO:0008526;GO:0005509;GO:0008525;GO:0016029	7222.FBpp0151667	GH17761	0.7923	COG5083	_	_	None	_
comp166853_c0_seq1	558	2-1675(+)	gi|157135683|ref|XP_001663545.1|	arsenite-resistance protein [Aedes aegypti]	0.63	GO:0005654;GO:0005515;GO:0031053	_	_	_	_	_	_	None	_
comp167108_c0_seq1	728	308-2491(-)	gi|168049868|ref|XP_001777383.1|	predicted protein [Physcomitrella patens subsp. patens]	0.83	GO:0048046;GO:0005524;GO:0010286;GO:0009414;GO:0071277;GO:0005730;GO:0005829;GO:0009651;GO:0005739;GO:0005886;GO:0006457;GO:0009908;GO:0005618;GO:0006952;GO:0051082;GO:0050821;GO:0048366	3218.JGI108065	hypothetical protein	0.8676	COG0326	KOG0019	_	K04079	htpG, HSP90A
comp1671659_c0_seq1	446	_	gi|478250369|gb|ENN70864.1|	hypothetical protein YQE_12270, partial [Dendroctonus ponderosae]	0.74	GO:0007186	_	_	_	_	_	_	None	_
comp167234_c0_seq1	167	29-529(+)	gi|15226833|ref|NP_181643.1|	calmodulin-like protein 4 [Arabidopsis thaliana]	0.57	GO:0051716;GO:0016043;GO:0009506;GO:0042221;GO:0006950;GO:0005774;GO:0043067;GO:0005515;GO:0009646;GO:0005509;GO:0009652	_	_	_	_	_	_	K13448	CML
comp167558_c0_seq1	154	1-462(+)	gi|6016404|sp|Q26491.1|ITP_SCHGR	RecName: Full=Ion transport peptide; Short=ITP; Flags: Precursor ion transport protein [Schistocerca gregaria]	0.58	GO:0007165;GO:0005179	_	_	_	_	_	_	None	_
comp167576_c0_seq1	1640	_	gi|470517204|ref|XP_004353177.1|	alanineglyoxylate aminotransferase [Acanthamoeba castellanii str. Neff]	0.8	GO:0016020;GO:0044464;GO:0050896;GO:0016740;GO:0043167	_	_	_	_	_	_	K00827	AGXT2
comp167597_c0_seq2	649	82-2028(+)	gi|512927330|ref|XP_004931307.1|	PREDICTED: ras association domain-containing protein 8-like [Bombyx mori]	0.66	GO:0007165	7070.D2A1S7	Putative uncharacterized protein GLEAN_07768	0.9487	_	KOG1574	_	None	_
comp167677_c0_seq1	471	1-1413(-)	gi|350409385|ref|XP_003488717.1|	PREDICTED: mitogen-activated protein kinase kinase kinase 7-like [Bombus impatiens]	0.75	GO:0000165;GO:0004674;GO:0000166;GO:0009069;GO:0006468;GO:0043167	7460.XP_397248	TGF-beta activated kinase 1	0.75	COG0515	KOG0192	_	K04427	MAP3K7, TAK1
comp1676785_c0_seq1	120	1-360(-)	gi|332029269|gb|EGI69252.1|	Atrial natriuretic peptide receptor A [Acromyrmex echinatior]	0.91	GO:0005524;GO:0006468;GO:0035556;GO:0006182;GO:0004672;GO:0016021;GO:0006144;GO:0046039;GO:0004383	7165.AGAP012597-PA	AGAP003283-PA	0.8917	COG2114	KOG1023	_	K12323	ANPRA, NPR1
comp167692_c0_seq1	369	_	gi|348682732|gb|EGZ22548.1|	hypothetical protein PHYSODRAFT_330319 [Phytophthora sojae]	0.73	GO:0006952;GO:0005576;GO:0009405	_	_	_	_	_	_	None	_
comp167904_c0_seq1	326	26-1003(-)	gi|323652552|gb|ADX98527.1|	GATA-binding protein 3 [Coturnix japonica]	0.76	GO:2000679;GO:0045786;GO:0021700;GO:0072107;GO:0048732;GO:0060065;GO:0010595;GO:0048568;GO:0050728;GO:0061290;GO:0008584;GO:0005515;GO:0001818;GO:0000987;GO:0071345;GO:0032753;GO:0007411;GO:0003215;GO:0003281;GO:0045892;GO:0031929;GO:0045941;GO:0070888;GO:0001046;GO:2000607;GO:0060037;GO:0045599;GO:0034968;GO:0000790;GO:0032609;GO:2000352;GO:0042491;GO:0000977;GO:0072179;GO:0045944;GO:2000664;GO:…	9031.ENSGALP00000010868	GATA-binding factor 3 (GATA-3)(Transcription factor NF-E1c); Transcriptional activator which [...]	0.8283	COG5641	_	_	K09182	GATA1_2_3
comp167953_c0_seq1	357	2-1072(-)	gi|512922738|ref|XP_004930190.1|	PREDICTED: sphingomyelin phosphodiesterase-like [Bombyx mori]	0.54	GO:0048522;GO:0006644;GO:0019220;GO:0009968;GO:0031399;GO:0044281;GO:0006672	_	_	_	_	_	_	K12350	SMPD1, ASM
comp168181_c0_seq1	192	1-579(+)	gi|225711228|gb|ACO11460.1|	Mitogen-activated protein kinase 14 [Caligus rogercresseyi]	0.88	GO:0000165;GO:0005524;GO:0009069;GO:0006468;GO:0007178;GO:0004707	7668.XP_001196202	similar to p38 MAPK	0.8977	COG0515	KOG0660	_	K04441	P38
comp168187_c0_seq1	326	1-978(-)	gi|58331863|ref|NP_001011095.1|	histone H4 transcription factor [Xenopus (Silurana) tropicalis]	0.63	GO:0042393;GO:0045893;GO:0045445;GO:0000083;GO:0005730;GO:0005667;GO:0015030;GO:0003700;GO:0045892;GO:0045184;GO:0006281;GO:0045941;GO:0000077;GO:0044212;GO:0003713;GO:0045449;GO:0019899	_	_	_	_	_	_	None	_
comp168313_c0_seq1	153	1-462(+)	gi|50261639|gb|AAT72404.1|	hypoxia-inducible factor 1 alpha [Palaemonetes pugio]	0.81	GO:0005634;GO:0003677;GO:0007165;GO:0006355;GO:0004871;GO:0046983	_	_	_	_	_	_	None	_
comp168325_c0_seq1	510	330-1859(-)	gi|194888058|ref|XP_001976853.1|	GG18558 [Drosophila erecta]	0.57	GO:0001746;GO:0035158;GO:0031594;GO:0005737;GO:0016319;GO:0035159;GO:0005515;GO:0008582;GO:0008038;GO:0042734;GO:0005886;GO:0045211;GO:0042059;GO:0042221;GO:0036062;GO:0048803;GO:0007612;GO:0048667;GO:0014069;GO:0008360;GO:0007156;GO:0072553	_	_	_	_	_	_	K06491	NCAM
comp168360_c0_seq1	444	79-1410(+)	gi|511839160|ref|XP_004744106.1|	PREDICTED: transcription factor Sp5-like isoform X1 [Mustela putorius furo]	0.49	GO:0001707;GO:0009952;GO:0006355;GO:0030903;GO:0016055;GO:0030902;GO:0036342	7955.ENSDARP00000023214	Sp5 transcription factor-like	0.8072	COG5048	_	_	K09195	SP5
comp168564_c0_seq1	464	551-1942(-)	gi|51859371|gb|AAH81628.1|	MAD, mothers against decapentaplegic homolog 3b (Drosophila) [Danio rerio]	0.82	GO:0048617;GO:0032444;GO:0031625;GO:0030513;GO:0048340;GO:0005737;GO:0030073;GO:0003690;GO:0017015;GO:0070410;GO:0009791;GO:0003682;GO:0009749;GO:0003700;GO:0033613;GO:0071141;GO:0007492;GO:0045892;GO:0035265;GO:0007182;GO:0019902;GO:0045944;GO:0070411;GO:0045449;GO:0030324;GO:0009952;GO:1900224;GO:0007183;GO:0035556;GO:0001707;GO:0051098;GO:0030618;GO:0070412;GO:0060021;GO:0034713;GO:0045165;GO:…	7955.ENSDARP00000043454	MAD, mothers against decapentaplegic homolog 3b	0.8223	_	KOG3701	_	K04500	SMAD2_3
comp168584_c0_seq1	273	545-1363(+)	gi|340711532|ref|XP_003394329.1|	PREDICTED: gamma-aminobutyric acid type B receptor subunit 1-like isoform 1 [Bombus terrestris]	0.75	GO:0007186;GO:0016020;GO:0004930	_	_	_	_	_	_	K04615	GABBR
comp1685_c0_seq1	157	3-476(+)	gi|405964650|gb|EKC30111.1|	Extended synaptotagmin-2 [Crassostrea gigas]	0.57	GO:0045892;GO:0005783;GO:0031965;GO:0009414;GO:0009958;GO:0008289;GO:0009651;GO:0043565;GO:0005886	_	_	_	_	_	_	None	_
comp168610_c0_seq1	453	3-1361(+)	gi|321458458|gb|EFX69526.1|	putative diuretic hormone 44 receptor [Daphnia pulex]	0.54	GO:0038023;GO:0016020;GO:0007165	_	_	_	_	_	_	K04578	CRHR1
comp168711_c0_seq2	143	3-434(+)	gi|189236448|ref|XP_973457.2|	PREDICTED: similar to chaperone protein dnaj [Tribolium castaneum]	0.65	GO:0080090;GO:0044767;GO:0060255;GO:0044260;GO:0044424;GO:0065009;GO:0005515;GO:0002376;GO:0048523;GO:0050896;GO:0031323;GO:0042981	_	_	_	_	_	_	K09504	DNAJA3
comp168774_c0_seq1	792	2-2377(+)	gi|270015108|gb|EFA11556.1|	plexin B [Tribolium castaneum]	0.77	GO:0007275;GO:0004872;GO:0005622;GO:0016021;GO:0043547;GO:0051056;GO:0005096	7159.AAEL014597-PA	plexin b	0.8203	_	KOG3610	_	K06820	PLXNA
comp168895_c0_seq1	174	1-525(+)	gi|170046272|ref|XP_001850696.1|	RNA binding motif protein 4,lark [Culex quinquefasciatus]	0.65	GO:0016070;GO:0030036;GO:0005737;GO:0007067;GO:0071013;GO:0003676;GO:0043167;GO:0008062;GO:0010467;GO:0007303;GO:0045804;GO:0009790;GO:0008104;GO:0045475;GO:0071011	_	_	_	_	_	_	K13187	RBM4
comp169003_c0_seq1	405	_	gi|157131668|ref|XP_001655916.1|	RNA recognition motif protein split ends [Aedes aegypti]	0.84	GO:0003729;GO:0000398;GO:0048749;GO:0035222;GO:0030177;GO:0022008;GO:0000166;GO:0071011	_	_	_	_	_	_	K13190	RBM15
comp169020_c0_seq1	593	153-1931(-)	gi|403289411|ref|XP_003935852.1|	PREDICTED: DNA helicase INO80 [Saimiri boliviensis boliviensis]	0.71	GO:0045298;GO:2000045;GO:0003677;GO:0006338;GO:0031011;GO:0030307;GO:0032508;GO:0034644;GO:0000070;GO:0043014;GO:0016887;GO:0051225;GO:0010571;GO:0071479;GO:0045944;GO:0006200;GO:0000724;GO:0003678;GO:0005657;GO:0070914	9544.ENSMMUP00000002321	INO80 homolog (S. cerevisiae)	0.907	COG0553	_	_	K11665	INO80, INOC1
comp1691022_c0_seq1	363	_	gi|357628225|gb|EHJ77615.1|	nicotinic acetylcholine receptor subunit alpha 7 isoform 1 [Danaus plexippus]	0.76	GO:0004889;GO:0007165;GO:0016021;GO:0030054;GO:0006812;GO:0005886;GO:0045211	7237.FBpp0287344	GA17221	0.8	_	KOG3645	_	None	_
comp169107_c0_seq1	171	2-517(+)	gi|321479038|gb|EFX89994.1|	putative AMP-activated protein kinase gamma (2) subunit [Daphnia pulex]	0.69	GO:0005634;GO:0009267;GO:0009069;GO:0006468;GO:2001020;GO:0005737;GO:0042595;GO:0004679;GO:0006914;GO:0030730;GO:0042632;GO:0006629;GO:0045787	_	_	_	_	_	_	None	_
comp169110_c0_seq1	191	3-578(+)	gi|409045333|gb|EKM54814.1|	hypothetical protein PHACADRAFT_258931 [Phanerochaete carnosa HHB-10118-sp]	0.6	GO:0005856;GO:0007186;GO:0005488;GO:0005886	_	_	_	_	_	_	K04640	GNA
comp169110_c0_seq2	204	3-614(+)	gi|325296851|ref|NP_001191457.1|	guanine nucleotide-binding protein G(i) alpha subunit [Aplysia californica]	0.74	GO:0007193;GO:0031821;GO:0005834;GO:0005813;GO:0043434;GO:0030168;GO:0005737;GO:0003924;GO:0030496;GO:0031683;GO:0051301;GO:0007268;GO:0004871;GO:0005525	7668.Q6QM17	guanine nucleotide-binding protein G(i) alpha subunit	0.7672	_	KOG0082	_	K04630	GNAI
comp169169_c0_seq1	189	59-625(+)	gi|290562005|gb|ADD38400.1|	ADP-ribosylation factor-like protein 8B-A [Lepeophtheirus salmonis]	0.95	GO:0007264;GO:0005622;GO:0005525	7425.XP_001599316	similar to ADP-ribosylation factor-like protein	0.9781	COG1100	KOG0075	_	K07956	ARL8B
comp169184_c0_seq1	194	150-731(-)	gi|225711464|gb|ACO11578.1|	Calmodulin [Caligus rogercresseyi]	0.69	GO:0015630;GO:0045937;GO:0044430;GO:0030234;GO:0080090;GO:1901019;GO:2001257;GO:0050896;GO:0019899;GO:0007049;GO:0043388;GO:0071704;GO:0043085	_	_	_	_	_	_	K13448	CML
comp169191_c0_seq1	183	1-549(-)	gi|313219917|emb|CBY30832.1|	unnamed protein product [Oikopleura dioica]	0.63	GO:0050896;GO:0009987;GO:0005488;GO:0071704	_	_	_	_	_	_	None	_
comp169277_c0_seq1	177	2-535(+)	gi|498962380|ref|XP_004524994.1|	PREDICTED: inositol hexakisphosphate and diphosphoinositol-pentakisphosphate kinase-like isoform X2 [Ceratitis capitata]	0.89	GO:0019497;GO:0006771;GO:0003993	_	_	_	_	_	_	K13024	HISPPD, VIP
comp169294_c0_seq1	322	3-968(+)	gi|195056375|ref|XP_001995086.1|	GH22955 [Drosophila grimshawi]	0.97	GO:0005840;GO:0005850;GO:0007416;GO:0003743;GO:0017148;GO:0007367;GO:0007294;GO:0006342;GO:0005634;GO:0035196;GO:0030727;GO:0030422;GO:0006402;GO:0048471;GO:0006446;GO:0036099;GO:0035279;GO:0035198;GO:0016442;GO:0030423;GO:0019899	_	_	_	_	_	_	K11593	ELF2C
comp169294_c0_seq2	327	3-983(+)	gi|195056375|ref|XP_001995086.1|	GH22955 [Drosophila grimshawi]	0.95	GO:0005840;GO:0005850;GO:0007416;GO:0003743;GO:0017148;GO:0007367;GO:0007294;GO:0006342;GO:0005634;GO:0035196;GO:0030727;GO:0030422;GO:0006402;GO:0048471;GO:0006446;GO:0036099;GO:0035279;GO:0035198;GO:0016442;GO:0030423;GO:0019899	_	_	_	_	_	_	K11593	ELF2C
comp169294_c0_seq3	322	3-968(+)	gi|195056375|ref|XP_001995086.1|	GH22955 [Drosophila grimshawi]	0.97	GO:0005840;GO:0005850;GO:0007416;GO:0003743;GO:0017148;GO:0007367;GO:0007294;GO:0006342;GO:0005634;GO:0035196;GO:0030727;GO:0030422;GO:0006402;GO:0048471;GO:0006446;GO:0036099;GO:0035279;GO:0035198;GO:0016442;GO:0030423;GO:0019899	_	_	_	_	_	_	K11593	ELF2C
comp169294_c0_seq4	327	3-983(+)	gi|195056375|ref|XP_001995086.1|	GH22955 [Drosophila grimshawi]	0.95	GO:0005840;GO:0005850;GO:0007416;GO:0003743;GO:0017148;GO:0007367;GO:0007294;GO:0006342;GO:0005634;GO:0035196;GO:0030727;GO:0030422;GO:0006402;GO:0048471;GO:0006446;GO:0036099;GO:0035279;GO:0035198;GO:0016442;GO:0030423;GO:0019899	_	_	_	_	_	_	K11593	ELF2C
comp169442_c0_seq1	150	164-613(+)	gi|64446704|gb|AAY41437.1|	calmodulin 2 [Apostichopus japonicus]	0.86	GO:0030425;GO:0007528;GO:0030048;GO:0051533;GO:0016477;GO:0043274;GO:2001020;GO:0016061;GO:0004683;GO:0031489;GO:0031996;GO:0032465;GO:0051489;GO:0005513;GO:0031476;GO:0006468;GO:0046331;GO:0007099;GO:0043277;GO:0040010;GO:0008049;GO:0006898;GO:0016060;GO:0007052;GO:0042052;GO:0051726;GO:0031475;GO:0005954;GO:0048786;GO:0000922;GO:0016028;GO:0005524;GO:0051296;GO:0007616;GO:0009792;GO:0030496;GO:…	7668.XP_001196947	similar to calmodulin 2	0.8681	COG5126	KOG0027	NOG277755	K02183	CALM
comp169496_c0_seq1	128	2-385(-)	gi|240978500|ref|XP_002402961.1|	retinoid X receptor, putative [Ixodes scapularis]	0.68	GO:0003707;GO:0006357;GO:0007165;GO:0004879;GO:0005488	_	_	_	_	_	_	K08362	NR1A2, THRB
comp169605_c0_seq1	234	3-704(-)	gi|176866349|ref|NP_001116528.1|	protein kinase C eta type [Danio rerio]	0.61	GO:0016310;GO:0044707;GO:0006950;GO:0035556;GO:0080090;GO:0005102;GO:0071310;GO:0019901;GO:0000139;GO:0043167;GO:0051046;GO:0005829;GO:0010917;GO:0017124;GO:0051239;GO:0005886;GO:0071704;GO:0051562;GO:1901701;GO:0009069;GO:0007267;GO:0043066;GO:0023056;GO:0051280;GO:0004674;GO:0010647;GO:0048584;GO:0009966;GO:0036094	_	_	_	_	_	_	K06068	NPKC
comp169742_c0_seq1	145	3-440(+)	gi|313213187|emb|CBY37039.1|	unnamed protein product [Oikopleura dioica]	0.72	GO:0008233;GO:0006030;GO:0006184;GO:0003924;GO:0030246;GO:0008061;GO:0007264;GO:0016021;GO:0005576;GO:0005525	_	_	_	_	_	_	None	_
comp169939_c0_seq1	349	2-1048(+)	gi|157116383|ref|XP_001658450.1|	hypothetical protein AaeL_AAEL007562 [Aedes aegypti]	0.66	GO:0006979;GO:0008105;GO:0005515;GO:0044425;GO:0005886;GO:0008355;GO:0045178;GO:0007616	_	_	_	_	_	_	None	_
comp169972_c0_seq1	149	1-447(-)	gi|405971288|gb|EKC36134.1|	Transcription factor MafK [Crassostrea gigas]	0.7	GO:0003677;GO:0045604;GO:0030534;GO:0042127;GO:0001701;GO:0006351	_	_	_	_	_	_	K11417	SIRT7, SIR2L7
comp170020_c0_seq1	175	1-525(+)	gi|66815357|ref|XP_641695.1|	hypothetical protein DDB_G0279407 [Dictyostelium discoideum AX4]	0.83	GO:0043231;GO:0051716;GO:0010880;GO:0044057;GO:0051592;GO:0005509;GO:0005829;GO:0005819;GO:0060316;GO:0006470;GO:0007268;GO:0019899;GO:0060315;GO:0033192	44689.DDB_0214955	calmodulin; Calmodulin mediates the control of a large number of enzymes and other proteins [...]	0.8392	COG5126	KOG0027	_	K02183	CALM
comp170022_c0_seq1	358	518-1591(+)	gi|321457519|gb|EFX68604.1|	hypothetical protein DAPPUDRAFT_63009 [Daphnia pulex]	0.9	GO:0007165	6945.ISCW024005-PA	arrestin domain-containing protein, putative	0.8525	_	KOG3780	_	None	_
comp170146_c0_seq1	618	2-1855(+)	gi|449498428|ref|XP_002192445.2|	PREDICTED: LOW QUALITY PROTEIN: kelch-like protein 4 [Taeniopygia guttata]	0.75	GO:0007399;GO:0007626;GO:0097458;GO:0044767	59729.ENSTGUP00000002487	Kelch-like protein 4 [Taeniopygia guttata]	0.7565	_	KOG4441	_	K10442	KLHL1_4_5
comp170172_c0_seq1	443	197-1525(-)	gi|312375079|gb|EFR22515.1|	hypothetical protein AND_15082 [Anopheles darlingi]	0.57	GO:0007528;GO:0043113;GO:0035187;GO:0008328;GO:0031594;GO:0046331;GO:0014069;GO:0007274;GO:0097106;GO:0060361	_	_	_	_	_	_	None	_
comp170279_c0_seq1	948	2-2845(-)	gi|498960754|ref|XP_004524691.1|	PREDICTED: rho guanine nucleotide exchange factor 18-like isoform X1 [Ceratitis capitata]	0.62	GO:0035556;GO:0005488	_	_	_	_	_	_	None	_
comp170422_c0_seq1	208	125-751(+)	gi|242005923|ref|XP_002423809.1|	GTP-binding nuclear protein RAN1, putative [Pediculus humanus corporis]	0.8	GO:0007264;GO:0005739;GO:0005525;GO:0015031	121224.XP_002423809	GTP-binding nuclear protein RAN1, putative	0.7978	COG1100	KOG4423	_	K07918	RAB32
comp170467_c0_seq1	313	2-940(+)	gi|307168145|gb|EFN61424.1|	Long-chain-fatty-acid--CoA ligase 3 [Camponotus floridanus]	0.74	GO:0005783;GO:0010890;GO:0004467;GO:0035282;GO:0005811;GO:0006631;GO:0007268;GO:0007411	_	_	_	_	_	_	K01897	ACSL, fadD
comp170646_c0_seq1	193	1-582(+)	gi|242006195|ref|XP_002423939.1|	conserved hypothetical protein [Pediculus humanus corporis]	0.74	GO:0010001;GO:0048488;GO:0045477;GO:0007619;GO:0009267;GO:0090099;GO:0035193;GO:0031982;GO:0045924;GO:0008347;GO:0008582;GO:0008333;GO:0007422;GO:0005886;GO:0007040	_	_	_	_	_	_	None	_
comp170723_c0_seq1	235	77-781(+)	gi|91076812|ref|XP_974369.1|	PREDICTED: similar to Kruppel-like factor 13 like [Tribolium castaneum]	0.81	GO:0003677;GO:0007212;GO:0006357;GO:0048523;GO:0005667;GO:0008270;GO:0003700;GO:0045449	7070.XP_974369	similar to Krueppel-like factor 13	0.8476	COG5048	KOG1721	_	K09208	KLF9S, BTEB
comp170723_c0_seq2	249	1-747(+)	gi|91076812|ref|XP_974369.1|	PREDICTED: similar to Kruppel-like factor 13 like [Tribolium castaneum]	0.81	GO:0003677;GO:0007212;GO:0006357;GO:0048523;GO:0005667;GO:0008270;GO:0003700;GO:0045449	7070.XP_974369	similar to Krueppel-like factor 13	0.8476	COG5048	KOG1721	_	K09208	KLF9S, BTEB
comp170880_c0_seq1	354	219-1280(-)	gi|195503717|ref|XP_002098769.1|	GE10550 [Drosophila yakuba]	0.65	GO:0045298;GO:0015631;GO:0015630;GO:0072375;GO:0008355	_	_	_	_	_	_	K04380	MAPT, TAU
comp170965_c0_seq1	467	2-1405(+)	gi|512936257|ref|XP_004933474.1|	PREDICTED: diuretic hormone receptor-like [Bombyx mori]	0.57	GO:0007165;GO:0004871	_	_	_	_	_	_	K04578	CRHR1
comp170965_c0_seq2	368	1-1107(+)	gi|321462048|gb|EFX73074.1|	putative diuretic hormone 44 receptor [Daphnia pulex]	0.52	GO:0038023;GO:0016020;GO:0007165	_	_	_	_	_	_	K04578	CRHR1
comp170970_c0_seq1	902	3-2711(+)	gi|157118786|ref|XP_001653260.1|	hypothetical protein AaeL_AAEL008398 [Aedes aegypti]	0.72	GO:0004674;GO:0005524;GO:0007264;GO:0009069;GO:0006468;GO:0005622;GO:0005525	7159.AAEL008398-PA	conserved hypothetical protein	0.7827	COG1100	KOG0619	_	None	_
comp171147_c0_seq1	300	3-905(+)	gi|223997468|ref|XP_002288407.1|	phospholipase [Thalassiosira pseudonana CCMP1335]	0.57	GO:0043231;GO:0008152;GO:0042221;GO:0003824;GO:0009987;GO:0044444	_	_	_	_	_	_	K01115	E3.1.4.4, PLD
comp171147_c0_seq2	272	3-821(+)	gi|223997468|ref|XP_002288407.1|	phospholipase [Thalassiosira pseudonana CCMP1335]	0.57	GO:0009395;GO:0043231;GO:0046466;GO:0009414;GO:0009737;GO:0004630;GO:0009651;GO:0044444	_	_	_	_	_	_	K01115	E3.1.4.4, PLD
comp171193_c0_seq1	307	2-925(+)	gi|189235535|ref|XP_972604.2|	PREDICTED: similar to AGAP006448-PB [Tribolium castaneum]	0.88	GO:0045859;GO:0007165;GO:0008603;GO:0016301;GO:0005952	7070.XP_972604	similar to CG3263-PC, isoform C	0.8826	COG0664	KOG1113	_	K04739	PRKAR
comp171224_c0_seq1	182	2-547(+)	gi|359372673|gb|AEV42205.1|	cytosolic heat shock protein 90kDa [Eurytemora affinis]	0.94	GO:0006457;GO:0005524;GO:0051082;GO:0006950	_	_	_	_	_	_	K04079	htpG, HSP90A
comp171224_c0_seq2	165	2-499(+)	gi|359372673|gb|AEV42205.1|	cytosolic heat shock protein 90kDa [Eurytemora affinis]	0.94	GO:0006457;GO:0005524;GO:0051082;GO:0006950	_	_	_	_	_	_	K04079	htpG, HSP90A
comp171243_c1_seq1	224	3-677(+)	gi|126697356|gb|ABO26635.1|	thioredoxin peroxidase 2 [Haliotis discus discus]	0.62	GO:0016209;GO:0006974;GO:0016491	_	_	_	_	_	_	K03386	E1.11.1.15, PRDX, ahpC
comp171256_c0_seq1	522	1-1566(+)	gi|443725261|gb|ELU12941.1|	hypothetical protein CAPTEDRAFT_198744 [Capitella teleta]	0.81	GO:0008762;GO:0051537;GO:0010627;GO:0005506;GO:0009968;GO:0050660;GO:0006118;GO:0004854;GO:0048731;GO:0055114;GO:0048522;GO:0043546;GO:0005829;GO:0031323;GO:0034418;GO:0010605;GO:0009055;GO:0030856;GO:0004855;GO:0030151;GO:0044767;GO:0006040;GO:0045596;GO:0009115	8090.ENSORLP00000001339	xanthine dehydrogenase	0.8008	COG4631	_	_	K00106	XDH
comp171397_c0_seq1	183	3-551(+)	gi|383856427|ref|XP_003703710.1|	PREDICTED: mitogen-activated protein kinase 14B-like isoform 2 [Megachile rotundata]	0.88	GO:0000165;GO:0005524;GO:0009069;GO:0006468;GO:0007178;GO:0004707	7159.AAEL008379-PC	P38 mapk	0.858	COG0515	KOG0660	_	K04441	P38
comp171516_c0_seq1	180	1-543(+)	gi|307186268|gb|EFN71931.1|	Ras-like GTP-binding protein RhoL [Camponotus floridanus]	0.64	GO:0007264	_	_	_	_	_	_	K07863	RHOG
comp171517_c0_seq1	839	33-2549(+)	gi|170046729|ref|XP_001850904.1|	conserved hypothetical protein [Culex quinquefasciatus]	0.79	GO:0001738;GO:0045179;GO:0016323;GO:0007391;GO:0042734;GO:0008285;GO:0005856;GO:0016327;GO:0007165;GO:0045167;GO:0016336;GO:0048471;GO:0019991;GO:0046956;GO:0008049;GO:0030710;GO:0045475;GO:0051726;GO:0045197;GO:0045196;GO:0031594;GO:0016332;GO:0051294;GO:0006144;GO:0051124;GO:0016328;GO:0045211;GO:0005154;GO:0004385;GO:0043195;GO:0045175;GO:0005920;GO:0007268;GO:0005198;GO:0016334	7176.CPIJ009531-PA	conserved hypothetical protein	0.8764	COG0194	_	_	K12075	DLG
comp171565_c0_seq1	486	175-1632(-)	gi|242019940|ref|XP_002430416.1|	retinoid X receptor, putative [Pediculus humanus corporis]	0.82	GO:0003707;GO:0006355;GO:0005667;GO:0008270;GO:0043565;GO:0043401;GO:0003700;GO:0045449	7070.XP_968613	similar to Transcription factor HNF-4 homolog (dHNF4)	0.8378	_	KOG4215	_	K08704	NR2A4, Hnf4
comp171592_c0_seq1	513	303-1841(+)	gi|71895619|ref|NP_001026666.1|	metal regulatory transcription factor 1 [Gallus gallus]	0.76	GO:0005622;GO:0050896;GO:0045893;GO:0001047	9031.ENSGALP00000002501	metal-regulatory transcription factor 1	0.7551	COG5048	_	_	None	_
comp171604_c0_seq1	407	161-1381(-)	gi|13928582|dbj|BAB47172.1|	As-rel1 [Halocynthia roretzi]	0.47	GO:0006355;GO:0033257;GO:0002224;GO:0005737;GO:0002268;GO:0005515;GO:0002467;GO:0005730;GO:0048536;GO:0030198	_	_	_	_	_	_	K04469	NFKB2
comp171740_c0_seq1	490	_	gi|55778655|gb|AAH86608.1|	Hras protein [Rattus norvegicus]	0.89	GO:0046330;GO:0030335;GO:0035022;GO:0006917;GO:0097193;GO:0032228;GO:0008285;GO:0035176;GO:0043524;GO:0032855;GO:1900029;GO:0045740;GO:0003924;GO:0007093;GO:0090303;GO:0008022;GO:0045944;GO:0005525;GO:0008542;GO:0051146;GO:0010629;GO:0007050;GO:0000139;GO:0090398;GO:0006897;GO:0005886;GO:2000251;GO:0051291;GO:0043406;GO:0034259;GO:0048169;GO:0070374;GO:2000630;GO:0050679	_	_	_	_	_	_	K02833	HRAS
comp1717778_c0_seq1	118	1-357(+)	gi|327241168|gb|AEA40428.1|	nicotinic acetylcholine receptor Paa7 subunit [Periplaneta americana]	0.86	GO:0007165;GO:0005892;GO:0030054;GO:0006812;GO:0017085;GO:0046716;GO:0004889;GO:0045211	_	_	_	_	_	_	None	_
comp171799_c0_seq1	377	124-1254(-)	gi|391348055|ref|XP_003748267.1|	PREDICTED: vitamin D3 receptor-like [Metaseiulus occidentalis]	0.68	GO:0038023;GO:0003677;GO:0006355;GO:0043167;GO:0005667;GO:0070887;GO:0003700;GO:0045449	_	_	_	_	_	_	K08537	NR1H4, FXR
comp171801_c0_seq1	206	2-619(+)	gi|307171708|gb|EFN63443.1|	Ras-related protein Rab-10 [Camponotus floridanus]	0.81	GO:0007264;GO:0005525;GO:0015031	7425.XP_001606644	similar to ras-related protein Rab-10, putative	0.8929	COG1100	KOG0078	_	K07976	RAB
comp171804_c0_seq1	279	146-982(+)	gi|321475160|gb|EFX86123.1|	hypothetical protein DAPPUDRAFT_23898 [Daphnia pulex]	0.67	GO:0004952;GO:0007268;GO:0016021;GO:0007187;GO:0007212	_	_	_	_	_	_	K04148	DRD1N, DopR
comp171804_c0_seq2	279	204-1040(+)	gi|321475160|gb|EFX86123.1|	hypothetical protein DAPPUDRAFT_23898 [Daphnia pulex]	0.67	GO:0004952;GO:0007268;GO:0016021;GO:0007187;GO:0007212	_	_	_	_	_	_	K04148	DRD1N, DopR
comp171960_c0_seq1	322	106-1074(+)	gi|321456334|gb|EFX67445.1|	hypothetical protein DAPPUDRAFT_63917 [Daphnia pulex]	0.87	GO:0035556	7176.CPIJ018458-PA	conserved hypothetical protein	0.7678	_	KOG0504	_	None	_
comp171960_c0_seq2	1345	_	gi|321456334|gb|EFX67445.1|	hypothetical protein DAPPUDRAFT_63917 [Daphnia pulex]	0.88	GO:0035556	_	_	_	_	_	_	None	_
comp171960_c0_seq3	190	106-678(+)	gi|242008891|ref|XP_002425230.1|	conserved hypothetical protein [Pediculus humanus corporis]	0.86	GO:0035556	_	_	_	_	_	_	None	_
comp171981_c0_seq1	130	3-392(-)	gi|194867022|ref|XP_001971990.1|	GG15272 [Drosophila erecta]	0.45	GO:0006804;GO:0016844;GO:0006979;GO:0020037;GO:0042432;GO:0004601;GO:0016114;GO:0055114	_	_	_	_	_	_	None	_
comp171981_c0_seq2	154	3-464(-)	gi|194750249|ref|XP_001957540.1|	GF23980 [Drosophila ananassae]	0.43	GO:0006804;GO:0016844;GO:0006979;GO:0020037;GO:0042432;GO:0004601;GO:0016114;GO:0055114	_	_	_	_	_	_	None	_
comp171986_c0_seq1	193	1-582(+)	gi|260819230|ref|XP_002604940.1|	hypothetical protein BRAFLDRAFT_58489 [Branchiostoma floridae]	0.61	GO:0007141;GO:0042802;GO:0007286;GO:0001556;GO:0007144;GO:0006302;GO:0007130;GO:0001673;GO:0007131	_	_	_	_	_	_	None	_
comp172018_c0_seq1	92	1-276(-)	gi|359372673|gb|AEV42205.1|	cytosolic heat shock protein 90kDa [Eurytemora affinis]	1	GO:0006457;GO:0005524;GO:0051082;GO:0006950	_	_	_	_	_	_	K04079	htpG, HSP90A
comp172108_c0_seq1	215	2-646(+)	gi|185134355|ref|NP_001117661.1|	matrix metalloproteinase-2 precursor [Oncorhynchus mykiss]	0.62	GO:0050794;GO:0004252;GO:0005615;GO:0004222;GO:0001957;GO:0030017;GO:0071230;GO:0007566;GO:0001666;GO:0001955;GO:0022617;GO:0005515;GO:0060346;GO:0060325;GO:0005886;GO:0030574	_	_	_	_	_	_	K01398	MMP2
comp172116_c0_seq1	879	1-2637(-)	gi|328787709|ref|XP_003250990.1|	PREDICTED: 1-phosphatidylinositol-4,5-bisphosphate phosphodiesterase classes I and II isoform 1 [Apis mellifera]	0.74	GO:0007165;GO:0008081;GO:0006629	_	_	_	_	_	_	K05858	PLCB
comp1721616_c0_seq1	127	1-381(-)	gi|345327989|ref|XP_001508174.2|	PREDICTED: DNA excision repair protein ERCC-6 [Ornithorhynchus anatinus]	0.82	GO:0003677;GO:0005524;GO:0006284;GO:0000303;GO:0047485;GO:0006283;GO:0004386;GO:0009636;GO:0010332;GO:0007256;GO:0032786;GO:0005730;GO:0003682;GO:0008630;GO:0010165;GO:0000785;GO:0010224;GO:0045494;GO:0007257;GO:0008022;GO:0008023;GO:0008094;GO:0032403;GO:0006290	_	_	_	_	_	_	K10841	ERCC6, CSB, RAD26
comp1721737_c0_seq1	151	3-458(+)	gi|498931138|ref|XP_004519074.1|	PREDICTED: myosin-M heavy chain-like [Ceratitis capitata]	0.71	GO:0043087;GO:0002121;GO:0035277;GO:0005085;GO:0007480;GO:0007411	_	_	_	_	_	_	None	_
comp172188_c0_seq2	203	1-612(+)	gi|225711642|gb|ACO11667.1|	Longitudinals lacking protein-like [Caligus rogercresseyi]	0.66	GO:0007426;GO:0048750;GO:0035147;GO:0035001;GO:0046843;GO:0035151;GO:0005700;GO:0031987;GO:0017053;GO:0002121;GO:0003682;GO:0007298;GO:0045467;GO:0045892;GO:0040003;GO:0001964;GO:0000978;GO:0000785;GO:0048854;GO:0042803;GO:0001078;GO:0048813;GO:0007476;GO:0048053;GO:0016476;GO:0045944;GO:0042675;GO:0000980	_	_	_	_	_	_	K09237	K09237
comp172204_c0_seq1	153	3-461(+)	gi|267850640|gb|ACY82398.1|	integrin [Litopenaeus vannamei]	0.85	GO:0007155;GO:0004872;GO:0007275;GO:0007229;GO:0016021	_	_	_	_	_	_	K05719	ITGB1
comp172237_c0_seq1	163	3-491(+)	gi|327263534|ref|XP_003216574.1|	PREDICTED: guanine nucleotide-binding protein subunit alpha-14-like [Anolis carolinensis]	0.71	GO:0006184;GO:0005834;GO:0060158;GO:0003924;GO:0031683;GO:0001664;GO:0000166;GO:0004871;GO:0007188	_	_	_	_	_	_	K04636	GNA14
comp172237_c0_seq2	163	3-491(+)	gi|327263534|ref|XP_003216574.1|	PREDICTED: guanine nucleotide-binding protein subunit alpha-14-like [Anolis carolinensis]	0.71	GO:0006184;GO:0005834;GO:0060158;GO:0003924;GO:0031683;GO:0001664;GO:0000166;GO:0004871;GO:0007188	_	_	_	_	_	_	K04636	GNA14
comp172364_c0_seq1	550	182-1831(+)	gi|193683390|ref|XP_001944820.1|	PREDICTED: tyrosine-protein kinase Src42A-like isoform 1 [Acyrthosiphon pisum]	0.94	GO:0005634;GO:0003677;GO:0007165;GO:0005524;GO:0006355;GO:0006468;GO:0046983;GO:0004713;GO:0004871	7425.XP_001606320	similar to CG7873-PA	0.8893	COG0515	KOG0197	_	K08892	FRK, PTK5
comp172447_c0_seq1	404	3-1214(+)	gi|195432420|ref|XP_002064221.1|	GK20049 [Drosophila willistoni]	0.6	GO:0006810;GO:0016264;GO:0007602;GO:0005921;GO:0007630;GO:0010644;GO:0005243;GO:0003254;GO:0007267;GO:0005886;GO:0009881	_	_	_	_	_	_	None	_
comp172468_c0_seq1	354	_	gi|269784867|ref|NP_001161585.1|	MEC2-like protein [Saccoglossus MEC2-like protein [Saccoglossus kowalevskii]	0.91	GO:0016021;GO:0007638;GO:0032589	6945.ISCW004329-PA	conserved hypothetical protein	0.9083	COG0330	KOG2621	_	None	_
comp172517_c0_seq1	425	55-1329(+)	gi|130486354|ref|NP_001076367.1|	trace amine-associated receptor 10a [Danio rerio]	0.57	GO:0016020;GO:0007165;GO:0050896;GO:0004871	_	_	_	_	_	_	K05051	TAAR
comp172595_c0_seq1	176	224-751(+)	gi|91076080|ref|XP_967713.1|	PREDICTED: similar to ADP-ribosylation factor 6 [Tribolium castaneum]	0.99	GO:0010008;GO:0007399;GO:0031529;GO:0030154;GO:0005938;GO:0030866;GO:0016192;GO:0001726;GO:0035020;GO:0005794;GO:0030838;GO:0005525;GO:0015031;GO:0031527	7070.XP_967713	similar to ADP-ribosylation factor 6	0.9942	COG1100	KOG0071	_	K07941	ARF6
comp172612_c0_seq1	202	3-608(+)	gi|333449473|gb|AEF33422.1|	Rho family small GTP binding protein cdc42 [Crassostrea ariakensis]	0.83	GO:0016020;GO:0051301;GO:0007264;GO:0005622;GO:0005525	9986.ENSOCUP00000008601	Small GTP binding protein CDC42 Fragment	0.8118	COG1100	KOG0393	_	K04393	CDC42
comp172639_c0_seq1	191	3-575(+)	gi|126306755|ref|XP_001369027.1|	PREDICTED: ubiquitin-conjugating enzyme E2 T-like [Monodelphis domestica]	0.83	GO:0070936;GO:0070534;GO:0035519;GO:0044314;GO:0006281;GO:0000785;GO:0006513;GO:0031625;GO:0070979;GO:0085020;GO:0004842;GO:0003682;GO:0051865	13616.ENSMODP00000000779	ubiquitin-conjugating enzyme E2T (putative)	0.8269	COG5078	KOG0417	_	K13960	UBE2T, HSPC150
comp172662_c0_seq1	927	3-2783(+)	gi|443731136|gb|ELU16373.1|	hypothetical protein CAPTEDRAFT_182016 [Capitella teleta]	0.72	GO:0006813;GO:0065008;GO:0034220;GO:0005488;GO:0005737;GO:0005391;GO:0005890;GO:0008016;GO:0050896;GO:0006942;GO:0006814;GO:0050877	_	_	_	_	_	_	None	_
comp172700_c0_seq1	444	106-1437(-)	gi|315190648|gb|ADT89789.1|	heat shock protein 70 [Ulva prolifera]	0.84	GO:0005524;GO:0006950	164328.JGI72463	annotation not available	0.8766	COG0443	KOG0101	_	K03283	HSPA1_8
comp172700_c0_seq2	407	130-1350(-)	gi|159487349|ref|XP_001701685.1|	binding protein 1 [Chlamydomonas reinhardtii]	0.76	GO:0005788;GO:0006457;GO:0005524;GO:0009506;GO:0016592;GO:0030433;GO:0009408;GO:0005774;GO:0005618;GO:0005829;GO:0005794;GO:0010197;GO:0005886;GO:0009507	3055.JGI133859	binding protein 1	0.77	COG0443	KOG0100	_	K09490	HSPA5, BIP
comp172715_c0_seq1	223	2-670(+)	gi|315139555|gb|ADT80930.1|	extracellular signal-regulated kinase 1/2 [Penaeus monodon]	0.84	GO:0000165;GO:0005524;GO:0001654;GO:0009069;GO:0006468;GO:0007178;GO:0007420;GO:0021952;GO:0009790;GO:0004707	7955.ENSDARP00000072509	mitogen-activated protein kinase 3	0.8341	COG0515	KOG0660	_	K04371	ERK1_2
comp172715_c0_seq2	319	1-960(+)	gi|260159566|gb|ACX32460.1|	mitogen-activated protein kinase [Scylla paramamosain]	0.86	GO:0000165;GO:0005524;GO:0009069;GO:0006468;GO:0007178;GO:0004707	6238.CBG21247	C. briggsae CBR-MPK-1 protein	0.8576	COG0515	KOG0660	_	K04371	ERK1_2
comp172715_c0_seq3	223	2-670(+)	gi|315139555|gb|ADT80930.1|	extracellular signal-regulated kinase 1/2 [Penaeus monodon]	0.84	GO:0000165;GO:0005524;GO:0001654;GO:0009069;GO:0006468;GO:0007178;GO:0007420;GO:0021952;GO:0009790;GO:0004707	7955.ENSDARP00000072509	mitogen-activated protein kinase 3	0.8341	COG0515	KOG0660	_	K04371	ERK1_2
comp172738_c0_seq1	616	_	gi|290562511|gb|ADD38651.1|	NADH dehydrogenase iron-sulfur protein 4, mitochondrial [Lepeophtheirus salmonis]	0.88	GO:0032981;GO:0006744;GO:0051591;GO:0048146;GO:0072593;GO:0007420;GO:0019933;GO:0001932;GO:0006120;GO:0005747;GO:0015992;GO:0006814;GO:0008137	8364.ENSXETP00000050528	NADH dehydrogenase (ubiquinone) Fe-S protein 4, 18kDa (NADH-coenzyme Q reductase)	0.7845	_	KOG3389	_	K03937	NDUFS4
comp172738_c0_seq2	857	_	gi|197127972|gb|ACH44470.1|	putative NADH dehydrogenase Fe-S protein 4 [Taeniopygia guttata]	0.66	GO:0032981;GO:0006744;GO:0051591;GO:0048146;GO:0072593;GO:0007420;GO:0019933;GO:0001932;GO:0006120;GO:0005747;GO:0015992;GO:0006814;GO:0008137	_	_	_	_	_	_	K03937	NDUFS4
comp172738_c0_seq4	184	329-880(-)	gi|332374672|gb|AEE62477.1|	unknown [Dendroctonus ponderosae]	0.65	GO:0050794;GO:0044763;GO:0016651;GO:0006091;GO:0005743;GO:0050896;GO:0055114	_	_	_	_	_	_	K03937	NDUFS4
comp172738_c0_seq6	186	82-639(-)	gi|290562511|gb|ADD38651.1|	NADH dehydrogenase iron-sulfur protein 4, mitochondrial [Lepeophtheirus salmonis]	0.88	GO:0050794;GO:0044763;GO:0016651;GO:0022900;GO:0005743;GO:0050896	59729.ENSTGUP00000002512	NADH dehydrogenase [ubiquinone] iron-sulfur protein 4, mitochondrial Precursor (NADH-ubiquin [...]	0.7742	_	KOG3389	_	K03937	NDUFS4
comp172753_c0_seq1	404	146-1357(+)	gi|321477468|gb|EFX88427.1|	guanine nucleotide binding protein, alpha stimulating activity polypeptide [Daphnia pulex]	0.81	GO:0007186;GO:0031683;GO:0006184;GO:0005525;GO:0004871;GO:0003924	6945.ISCW019433-PA	guanine nucleotide-binding protein, putative	0.8206	_	KOG0099	_	K04632	GNAS
comp172777_c0_seq1	629	1240-3126(-)	gi|443694209|gb|ELT95402.1|	hypothetical protein CAPTEDRAFT_72562, partial [Capitella teleta]	0.73	GO:0031399;GO:0007067;GO:0030496;GO:0005515;GO:0048523;GO:0000166;GO:0031572;GO:0005634;GO:0071168;GO:0005813;GO:0006468;GO:0009069;GO:0065009;GO:0004674;GO:0051726;GO:0000776	8364.ENSXETP00000040861	polo-like kinase 2 (Drosophila)	0.7695	COG0515	_	_	K08861	PLK2
comp172824_c0_seq1	114	54-398(+)	gi|241697170|ref|XP_002413104.1|	GABA transporter, putative [Ixodes scapularis]	0.82	GO:0016021;GO:0006812;GO:0005328;GO:0006836;GO:0009636	45351.JGI10746	annotation not available	0.7941	COG0733	_	_	K05038	SLC6A5S
comp172840_c0_seq1	305	3-917(-)	gi|212283364|gb|ACJ23177.1|	semaphorin 2a [Polyrhachis vicina]	0.88	GO:0007399;GO:0007165;GO:0030154;GO:0004872;GO:0016021;GO:0005576	_	_	_	_	_	_	None	_
comp1729105_c0_seq1	156	1-471(+)	gi|380030143|ref|XP_003698715.1|	PREDICTED: LOW QUALITY PROTEIN: glutamate [NMDA]	0.84	GO:0030054;GO:0006811;GO:0035235;GO:0005234;GO:0004970;GO:0016021;GO:0007268;GO:0030288;GO:0005886;GO:0045211	_	_	_	_	_	_	K05208	GRIN1
comp172961_c0_seq1	162	1-486(-)	gi|443713222|gb|ELU06187.1|	hypothetical protein CAPTEDRAFT_162678 [Capitella teleta]	0.95	GO:0008353;GO:0005524;GO:0009069;GO:0006468;GO:0016055	_	_	_	_	_	_	K03097	CSNK2A
comp172982_c1_seq1	124	2-373(+)	gi|242005943|ref|XP_002423819.1|	RING-box protein 1A, putative [Pediculus humanus corporis]	0.92	GO:0030178;GO:0016567;GO:0004842;GO:0019005;GO:0019915;GO:0022008;GO:0008283;GO:0006508;GO:0008270;GO:0007224	121224.XP_002423819	RING-box protein 1A, putative	0.9352	COG5194	KOG2930	_	K03868	RBX1, ROC1
comp173101_c0_seq1	323	2-973(+)	gi|225709844|gb|ACO10768.1|	Haloalkane dehalogenase [Caligus rogercresseyi]	0.63	GO:0019260;GO:0018786;GO:0018888	_	_	_	_	_	_	K01563	dhaA
comp173138_c0_seq2	258	2-775(+)	gi|339235703|ref|XP_003379406.1|	forkhead box protein P1 [Trichinella spiralis]	0.75	GO:0046982;GO:0048745;GO:0060501;GO:0002639;GO:0005737;GO:0003705;GO:0003690;GO:0007389;GO:0000122;GO:0005730;GO:0003682;GO:0005667;GO:0060043;GO:0002329;GO:0000785;GO:0008045;GO:0045214;GO:0002053;GO:0001701;GO:0051090;GO:0042803;GO:0033152;GO:0046872;GO:0045944;GO:2000727;GO:0007519;GO:0008301;GO:0008134	10141.ENSCPOP00000003365	forkhead box P1	0.75	COG5025	_	_	K09409	FOXP
comp173138_c0_seq3	236	2-709(+)	gi|339235703|ref|XP_003379406.1|	forkhead box protein P1 [Trichinella spiralis]	0.75	GO:0046982;GO:0048745;GO:0060501;GO:0002639;GO:0005737;GO:0003705;GO:0003690;GO:0007389;GO:0000122;GO:0005730;GO:0003682;GO:0005667;GO:0060043;GO:0002329;GO:0000785;GO:0008045;GO:0045214;GO:0002053;GO:0001701;GO:0051090;GO:0042803;GO:0033152;GO:0046872;GO:0045944;GO:2000727;GO:0007519;GO:0008301;GO:0008134	10141.ENSCPOP00000003365	forkhead box P1	0.75	COG5025	_	_	K09409	FOXP
comp173138_c0_seq5	205	2-616(+)	gi|339235703|ref|XP_003379406.1|	forkhead box protein P1 [Trichinella spiralis]	0.75	GO:0046982;GO:0048745;GO:0060501;GO:0002639;GO:0005737;GO:0003705;GO:0003690;GO:0007389;GO:0000122;GO:0005730;GO:0003682;GO:0005667;GO:0060043;GO:0002329;GO:0000785;GO:0008045;GO:0045214;GO:0002053;GO:0001701;GO:0051090;GO:0042803;GO:0033152;GO:0046872;GO:0045944;GO:2000727;GO:0007519;GO:0008301;GO:0008134	10141.ENSCPOP00000003365	forkhead box P1	0.75	COG5025	_	_	K09409	FOXP
comp173138_c0_seq6	227	2-682(+)	gi|339235703|ref|XP_003379406.1|	forkhead box protein P1 [Trichinella spiralis]	0.75	GO:0046982;GO:0048745;GO:0060501;GO:0002639;GO:0005737;GO:0003705;GO:0003690;GO:0007389;GO:0000122;GO:0005730;GO:0003682;GO:0005667;GO:0060043;GO:0002329;GO:0000785;GO:0008045;GO:0045214;GO:0002053;GO:0001701;GO:0051090;GO:0042803;GO:0033152;GO:0046872;GO:0045944;GO:2000727;GO:0007519;GO:0008301;GO:0008134	10141.ENSCPOP00000003365	forkhead box P1	0.75	COG5025	_	_	K09409	FOXP
comp173177_c0_seq1	217	1-651(-)	gi|189236687|ref|XP_973103.2|	PREDICTED: similar to AGAP003501-PA [Tribolium castaneum]	0.7	GO:0019433;GO:0016239;GO:0008340;GO:0040010;GO:0004806	_	_	_	_	_	_	None	_
comp173179_c0_seq2	163	2-493(+)	gi|290462209|gb|ADD24152.1|	Neuronal calcium sensor 2 [Lepeophtheirus salmonis]	0.66	GO:0030425;GO:0007602;GO:0051924;GO:0005509;GO:0007601	_	_	_	_	_	_	K13764	RCVRN
comp173179_c0_seq3	163	2-493(+)	gi|290462209|gb|ADD24152.1|	Neuronal calcium sensor 2 [Lepeophtheirus salmonis]	0.65	GO:0030425;GO:0007602;GO:0051924;GO:0005509;GO:0007601	_	_	_	_	_	_	K13764	RCVRN
comp173185_c0_seq1	133	1-399(-)	gi|91086717|ref|XP_970675.1|	PREDICTED: similar to Nascent polypeptide associated complex protein alpha subunit CG8759-PB [Tribolium castaneum]	0.71	GO:0061384;GO:0045941;GO:0043403;GO:0048742;GO:1901228;GO:0010664;GO:1901227;GO:0048633;GO:0003713;GO:0005667;GO:0005854;GO:0006412;GO:0017025;GO:0003231;GO:2000138	_	_	_	_	_	_	K03626	EGD2, NACA
comp173198_c0_seq1	121	1-363(+)	gi|321452529|gb|EFX63892.1|	hypothetical protein DAPPUDRAFT_305931 [Daphnia pulex]	0.95	GO:0006979;GO:0006804;GO:0004601;GO:0055114;GO:0051920	6945.ISCW015321-PA	thioredoxin-dependent peroxide reductase	0.9083	COG0450	KOG0852	_	K03386	E1.11.1.15, PRDX, ahpC
comp173204_c0_seq1	122	40-405(+)	gi|501295465|dbj|BAN20875.1|	conserved hypothetical protein [Riptortus pedestris]	0.83	GO:0030111	7217.FBpp0113250	GF10058	0.7983	_	KOG3553	_	None	_
comp173228_c0_seq1	167	118-618(-)	gi|328709078|ref|XP_001949220.2|	PREDICTED: hypothetical protein LOC100161147 [Acyrthosiphon pisum]	0.69	GO:0007186;GO:0016021;GO:0004930	_	_	_	_	_	_	None	_
comp173284_c0_seq1	434	_	gi|512127157|gb|AGN95867.1|	checkpoint kinase 1 [Daphnia pulex]	0.79	GO:0007444;GO:0005524;GO:0007095;GO:0007348;GO:0007050;GO:0030162;GO:0051299;GO:0001700;GO:0007349;GO:0005634;GO:0051225;GO:0016321;GO:0006479;GO:0009069;GO:0046331;GO:0042060;GO:0006468;GO:0033314;GO:0004674;GO:0009314;GO:2000637;GO:0031151	7227.FBpp0080441	grapes; Required for checkpoint mediated cell cycle arrest in response to DNA damage or the [...]	0.8254	COG0515	_	_	K02216	CHK1
comp173331_c0_seq1	386	_	gi|170591300|ref|XP_001900408.1|	GTP-binding nuclear protein RAN/TC4 [Brugia malayi]	0.99	GO:0006886;GO:0005634;GO:0006913;GO:0006184;GO:0007264;GO:0005525;GO:0003924	7070.XP_966512	similar to CG1404-PA, isoform A	0.9821	COG1100	KOG0096	_	K07936	RAN
comp173356_c0_seq1	195	81-665(-)	gi|270003537|gb|EEZ99984.1|	hypothetical protein TcasGA2_TC002783 [Tribolium castaneum]	0.79	GO:0005634;GO:0046580;GO:0003676;GO:0016360;GO:0006099;GO:0014019;GO:0030536;GO:0046672;GO:2000035;GO:0002052;GO:0097150	7227.FBpp0075976	klumpfuss	0.835	COG5048	KOG1721	_	None	_
comp173371_c0_seq1	146	244-681(+)	gi|317418541|emb|CBN80579.1|	Glutathione peroxidase [Dicentrarchus labrax]	0.72	GO:0065008;GO:0003008;GO:0009888;GO:0055114;GO:0000302;GO:0006804;GO:0008283;GO:0044238;GO:0044237;GO:0009611;GO:0048513;GO:0007165;GO:0030154;GO:0044767;GO:0019222;GO:0010035;GO:0004601;GO:0043170;GO:0042981	_	_	_	_	_	_	K00432	E1.11.1.9
comp173371_c0_seq2	141	230-652(+)	gi|361050318|dbj|BAL41420.1|	glutathione peroxidase GPx1b [Thunnus orientalis]	0.76	GO:0006979;GO:0006804;GO:0004601	8090.ENSORLP00000001008	glutathione peroxidase 1	0.7609	COG0386	KOG1651	_	K00432	E1.11.1.9
comp173451_c0_seq1	196	67-654(+)	gi|340709714|ref|XP_003393447.1|	PREDICTED: cdc42 homolog [Bombus terrestris]	0.94	GO:0045185;GO:0005622;GO:0005912;GO:0007264;GO:0007275;GO:0045860;GO:0005525;GO:0005886	7260.FBpp0246455	GK17312	0.9471	COG1100	KOG0393	_	K04393	CDC42
comp173451_c0_seq2	192	67-642(+)	gi|501292430|dbj|BAN20477.1|	cdc42 homolog precursor [Riptortus pedestris]	0.98	GO:0016020;GO:0007264;GO:0005622;GO:0005525	7070.XP_966688	similar to Cdc42 protein homolog	0.9843	COG1100	KOG0393	_	K04393	CDC42
comp173456_c0_seq1	302	3-908(-)	gi|472367132|ref|XP_004403100.1|	PREDICTED: rho guanine nucleotide exchange factor 11 [Odobenus rosmarus divergens]	0.76	GO:0007186;GO:0007266;GO:0001664;GO:0005737;GO:0045893	_	_	_	_	_	_	K12331	ARHGEF11
comp173472_c0_seq1	261	1-783(-)	gi|327288636|ref|XP_003229032.1|	PREDICTED: serine/threonine-protein kinase SMG1-like [Anolis carolinensis]	0.76	GO:0005634;GO:0009069;GO:0000184;GO:0005737;GO:0046854;GO:0043167;GO:0046777;GO:0018105;GO:0004674;GO:0000166;GO:0006974	_	_	_	_	_	_	K08873	SMG1
comp173513_c0_seq2	401	1-1203(-)	gi|270001010|gb|EEZ97457.1|	hypothetical protein TcasGA2_TC011288 [Tribolium castaneum]	0.82	GO:0016324;GO:0007596;GO:0006970;GO:0034465;GO:0060083;GO:0005901;GO:0043065;GO:0030007;GO:0000166;GO:0060072;GO:0042391;GO:0008076;GO:0005249;GO:0055085;GO:0006813;GO:0045794;GO:0001666;GO:0003779;GO:0051592;GO:0007268	_	_	_	_	_	_	K04936	KCNMA1
comp173516_c0_seq1	118	145-501(+)	gi|327274412|ref|XP_003221971.1|	PREDICTED: hypothetical protein LOC100556253, partial [Anolis carolinensis]	0.56	GO:0005634;GO:0031062;GO:0006355;GO:0051568;GO:0044767;GO:0048731;GO:0045935;GO:0006974;GO:0006310	_	_	_	_	_	_	K14972	PAXIP1, PTIP
comp173603_c0_seq3	88	519-782(-)	gi|291222885|ref|XP_002731448.1|	PREDICTED: sodium-calcium exchanger-like [Saccoglossus kowalevskii]	0.68	GO:0010763;GO:0016323;GO:0005874;GO:0002028;GO:0048747;GO:0001892;GO:0051481;GO:0030018;GO:0005887;GO:0009791;GO:0043197;GO:0014704;GO:0030506;GO:0030315;GO:0001666;GO:0014829;GO:0040010;GO:0055013;GO:0033198;GO:0034614;GO:0071320;GO:0003007;GO:0071436;GO:0086064;GO:0071313;GO:0044557;GO:0010881;GO:0005739;GO:0005432;GO:0035050;GO:0002027;GO:0043198;GO:0002026;GO:0044325;GO:0070509	_	_	_	_	_	_	K05849	SLC8A, NCX
comp173611_c0_seq1	595	1-1785(-)	gi|195564370|ref|XP_002105793.1|	GD24425 [Drosophila simulans]	0.78	GO:0016020;GO:0035147;GO:0042995;GO:0016477;GO:0008045;GO:0008021;GO:0046331;GO:0007476;GO:0072499;GO:0016079;GO:0035249;GO:0007156	7217.FBpp0122196	GF19004	0.8109	_	KOG3543	_	None	_
comp173611_c0_seq2	612	1-1836(-)	gi|78706460|ref|NP_001027031.1|	calcium activated protein for secretion, isoform A [Drosophila melanogaster]	0.79	GO:0016020;GO:0035147;GO:0042995;GO:0016477;GO:0008045;GO:0008021;GO:0046331;GO:0005543;GO:0007476;GO:0072499;GO:0016079;GO:0035249;GO:0007156	7217.FBpp0122196	GF19004	0.8095	_	KOG3543	_	None	_
comp173662_c0_seq1	207	550-1170(-)	gi|322789052|gb|EFZ14510.1|	hypothetical protein SINV_15432 [Solenopsis invicta]	0.98	GO:0016020;GO:0007264;GO:0005622;GO:0005525	7425.XP_001607487	PREDICTED: similar to putative Rho1 isoform 1 [Nasonia vitripennis].	0.9948	COG1100	KOG0393	_	K04513	RHOA
comp173662_c0_seq2	206	485-1102(-)	gi|45332272|gb|AAS58058.1|	RhoA [Tigriopus japonicus]	0.98	GO:0016020;GO:0007264;GO:0005622;GO:0005525	7159.AAEL013139-PD	GTPase_rho	0.9843	COG1100	KOG0393	_	K04513	RHOA
comp173677_c0_seq1	648	1-1944(-)	gi|321465056|gb|EFX76060.1|	hypothetical protein DAPPUDRAFT_322731 [Daphnia pulex]	0.72	GO:0000165;GO:0004674;GO:0000166;GO:0009069;GO:0006468	7460.XP_395037	mitogen-activated protein kinase kinase kinase kinase 9	0.7737	COG0515	KOG0192	_	None	_
comp1736864_c0_seq1	148	45-488(-)	gi|443682500|gb|ELT87081.1|	hypothetical protein CAPTEDRAFT_173460 [Capitella teleta]	0.67	GO:0071333;GO:0005488	9031.ENSGALP00000022167	zinc finger protein 236	0.7556	COG5048	KOG1721	_	None	_
comp173760_c0_seq1	258	79-852(-)	gi|391332830|ref|XP_003740832.1|	PREDICTED: uncharacterized protein LOC100900625 [Metaseiulus occidentalis]	0.7	GO:0005634;GO:0007626;GO:0007567;GO:0043565;GO:0006351;GO:0048598	_	_	_	_	_	_	K09341	MSX
comp173762_c0_seq1	353	1-1059(-)	gi|335306798|ref|XP_003360576.1|	PREDICTED: ATP-dependent RNA helicase DDX3X-like isoform 1 [Sus scrofa]	0.66	GO:0043229;GO:0003723;GO:0010468;GO:0097190;GO:0035556;GO:0080090;GO:0065003;GO:0008026;GO:0032991;GO:0048522;GO:0048523;GO:0051128;GO:0000166;GO:0044444;GO:2000112	7460.XP_391829	similar to belle CG9748-PA	0.8024	COG0513	KOG0335	_	K11594	DDX3X, bel
comp173776_c0_seq1	415	_	gi|321472355|gb|EFX83325.1|	hypothetical protein DAPPUDRAFT_100611 [Daphnia pulex]	0.99	GO:0000226;GO:0005881;GO:0006184;GO:0051084;GO:0005200;GO:0003924;GO:0051258;GO:0005515;GO:0051301;GO:0071353;GO:0005525;GO:0030705	_	_	_	_	_	_	K07374	TUBA
comp173818_c0_seq1	135	1-405(-)	gi|334333140|ref|XP_001377703.2|	PREDICTED: serine/threonine-protein kinase PLK1-like [Monodelphis domestica]	0.79	GO:0045298;GO:0000922;GO:0051233;GO:0090007;GO:0005737;GO:0019901;GO:0030496;GO:0051297;GO:0000122;GO:0046677;GO:0007092;GO:0000166;GO:0040038;GO:0031648;GO:0031572;GO:0005876;GO:0043393;GO:0071168;GO:0000942;GO:0009069;GO:0005813;GO:0043066;GO:0045736;GO:0008017;GO:0000236;GO:0010800;GO:0010997;GO:0018105;GO:0004674;GO:0000086;GO:0001578	13616.ENSMODP00000008293	annotation not avaliable	0.7883	COG0515	_	_	K06631	PLK1
comp1738818_c0_seq1	156	1-471(+)	gi|328700235|ref|XP_001951425.2|	PREDICTED: latrophilin Cirl-like [Acyrthosiphon pisum]	0.67	GO:0016020;GO:0004871;GO:0007166	_	_	_	_	_	_	None	_
comp173881_c1_seq1	219	80-739(+)	gi|498937467|ref|XP_004520652.1|	PREDICTED: Pyruvate dehydrogenase [lipoamide]	0.62	GO:0046620;GO:0001558;GO:0048477;GO:0006468;GO:0044464;GO:0031594;GO:0043066;GO:0007166;GO:0045793;GO:0007283;GO:0007476;GO:0007548;GO:0004672;GO:0051124;GO:0006974	_	_	_	_	_	_	K00898	E2.7.11.2, PDK
comp173901_c0_seq1	131	57-449(-)	gi|45775782|gb|AAS77384.1|	innexin 2 [Bombyx mori]	0.73	GO:0016327;GO:0005921;GO:0016324;GO:0005243;GO:0007267;GO:0030727;GO:0007440;GO:0016331;GO:0042048;GO:0010496	_	_	_	_	_	_	None	_
comp173901_c0_seq3	131	57-449(-)	gi|45775782|gb|AAS77384.1|	innexin 2 [Bombyx mori]	0.73	GO:0016327;GO:0005921;GO:0016324;GO:0005243;GO:0007267;GO:0030727;GO:0007440;GO:0016331;GO:0042048;GO:0010496	_	_	_	_	_	_	None	_
comp173979_c0_seq1	210	2-631(+)	gi|432868349|ref|XP_004071494.1|	PREDICTED: ras-related C3 botulinum toxin substrate 1-like [Oryzias latipes]	0.81	GO:0016020;GO:0030036;GO:0006184;GO:0003924;GO:0043025;GO:0012505;GO:0030426;GO:0005515;GO:0007264;GO:0031175;GO:0050885;GO:0005525;GO:0030031;GO:0031941	7159.AAEL009732-PA	rac GTPase	0.8125	COG1100	KOG0393	_	K04392	RAC1
comp174071_c0_seq1	290	22-891(+)	gi|241246278|ref|XP_002402642.1|	serine/threonine protein kinase, putative [Ixodes scapularis]	0.63	GO:0061179;GO:0004674;GO:0005515;GO:0009069;GO:0006468;GO:0007049;GO:0006915	_	_	_	_	_	_	K04702	PIM1
comp174125_c0_seq1	187	1-561(+)	gi|7710014|ref|NP_057925.1|	cullin-3 [Mus musculus]	0.82	GO:0005827;GO:0016477;GO:0000090;GO:0048208;GO:0031625;GO:0031208;GO:0007050;GO:0040016;GO:0017145;GO:0001831;GO:0007229;GO:0097193;GO:0031463;GO:0030332;GO:0000209;GO:0007369;GO:0032467;GO:0005634;GO:0006513;GO:0004842;GO:0008054;GO:0005794;GO:0000082;GO:0016055;GO:0035024;GO:0043149;GO:0008284	_	_	_	_	_	_	K03869	CUL3
comp1742620_c0_seq1	139	1-417(-)	gi|321474937|gb|EFX85901.1|	hypothetical protein DAPPUDRAFT_45411 [Daphnia pulex]	0.92	GO:0016500;GO:0004721;GO:0006470;GO:0016021;GO:0007187	_	_	_	_	_	_	K08399	LGR6
comp174311_c0_seq1	382	389-1534(-)	gi|328703954|ref|XP_001947422.2|	PREDICTED: cAMP-specific 3',5'-cyclic phosphodiesterase-like [Acyrthosiphon pisum]	0.85	GO:0046872;GO:0004114;GO:0007165;GO:0006144	7425.XP_001600650	similar to CG32498-PI	0.8417	_	KOG3689	_	K01120	E3.1.4.17, PDE
comp1743709_c0_seq1	360	_	gi|94536697|ref|NP_001035477.1|	protein Wnt-4a precursor [Danio WNT4A_DANRE RecName: Full=Protein Wnt-4a; Flags: Precursor Wnt4 protein [Danio r	0.74	GO:0060129;GO:0048599;GO:0051093;GO:0005615;GO:0008584;GO:0001658;GO:0070654;GO:0042074;GO:0000904;GO:0007492;GO:0040037;GO:0007507;GO:0051240;GO:0001664;GO:0045595;GO:0009952;GO:0072164;GO:0010566;GO:0045893;GO:0006702;GO:0060828;GO:0060126;GO:0046165;GO:0009798;GO:0005886;GO:0001656;GO:2000241;GO:0021986;GO:0022603;GO:0030278;GO:0005578;GO:0051145;GO:0008585;GO:0072033;GO:0090031;GO:0031327;GO:…	_	_	_	_	_	_	K00408	WNT4
comp174439_c0_seq1	459	3-1382(+)	gi|345796102|ref|XP_535768.3|	PREDICTED: kalirin isoform 2 [Canis lupus familiaris]	0.56	GO:0043087;GO:0044424;GO:0016310;GO:0016740;GO:0005085;GO:0051056	_	_	_	_	_	_	K15048	KALRN
comp174509_c0_seq5	150	3-452(-)	gi|126321609|ref|XP_001366025.1|	PREDICTED: retinal homeobox protein Rx-like [Monodelphis domestica]	0.59	GO:0040040;GO:0005515;GO:0005667;GO:0045449;GO:0003700;GO:0006366	_	_	_	_	_	_	K09326	OTX
comp174509_c0_seq6	211	5-637(-)	gi|410917546|ref|XP_003972247.1|	PREDICTED: homeobox protein OTX1 B-like [Takifugu rubripes]	0.5	GO:0040040;GO:0005515;GO:0005667;GO:0045449;GO:0003700;GO:0006366	45351.JGI121842	hypothetical protein	0.75	_	KOG2251	_	K09326	OTX
comp174509_c0_seq7	145	3-437(-)	gi|31322762|gb|AAP32747.1|	orthodenticle-alpha [Patiria miniata]	0.62	GO:0040040;GO:0003677;GO:0005515;GO:0005667;GO:0045449;GO:0003700;GO:0006366	_	_	_	_	_	_	K09326	OTX
comp174517_c0_seq1	591	239-2011(-)	gi|242020565|ref|XP_002430723.1|	SPRY domain-containing SOCS box protein, putative [Pediculus humanus corporis]	0.86	GO:0035556	7425.XP_001606358	similar to conserved hypothetical protein	0.8595	_	KOG3953	_	K10343	SPSB1_4, SSB1, SSB4
comp174532_c0_seq1	532	658-2253(+)	gi|307173075|gb|EFN64205.1|	Potassium voltage-gated channel protein Shaker [Camponotus floridanus]	0.9	GO:0007629;GO:0048675;GO:0051260;GO:0048047;GO:0048150;GO:0007611;GO:0008076;GO:0050909;GO:0008345;GO:0007619;GO:0034765;GO:0005251;GO:0007637;GO:0045187;GO:0001508;GO:0060025;GO:0009584;GO:0071805	7070.XP_001809693	similar to Shaker CG12348-PC	0.9168	COG1226	KOG1545	_	K05318	KCNAN
comp174549_c0_seq1	282	1-846(-)	gi|326429333|gb|EGD74903.1|	hypothetical protein PTSG_07131 [Salpingoeca sp. ATCC 50818]	0.5	GO:0016021;GO:0007218;GO:0004930	_	_	_	_	_	_	None	_
comp174552_c0_seq2	209	353-979(+)	gi|328699029|ref|XP_001948246.2|	PREDICTED: rho GTPase-activating protein 190-like isoform 1 [Acyrthosiphon pisum]	0.78	GO:0007399;GO:0043229;GO:0009653;GO:0007165;GO:0048513;GO:0065008;GO:0006355;GO:0044767	_	_	_	_	_	_	K05732	GRLF1
comp174597_c0_seq1	183	259-807(-)	gi|321462724|gb|EFX73745.1|	hypothetical protein DAPPUDRAFT_231341 [Daphnia pulex]	1	GO:0007264;GO:0005622;GO:0005525	7425.XP_001599092	similar to ADP-ribosylation factor 1; ARF 1	0.9945	COG1100	KOG0070	_	K07977	ARF
comp174606_c0_seq1	155	1-468(+)	gi|332028581|gb|EGI68618.1|	Protein lethal(2)denticleless [Acromyrmex echinatior]	0.58	GO:0044267;GO:0044763;GO:0043229;GO:0050896	_	_	_	_	_	_	K11790	DTL, CDT2, DCAF2
comp174615_c0_seq1	491	_	gi|321464054|gb|EFX75065.1|	hypothetical protein DAPPUDRAFT_56406 [Daphnia pulex]	0.62	GO:0007165;GO:0000166	_	_	_	_	_	_	K07847	REM1
comp174615_c0_seq2	100	53-352(-)	gi|321464054|gb|EFX75065.1|	hypothetical protein DAPPUDRAFT_56406 [Daphnia pulex]	0.64	GO:0016020;GO:0006184;GO:0007264;GO:0005525;GO:0003924	_	_	_	_	_	_	K07847	REM1
comp174644_c0_seq2	127	71-451(+)	gi|225713862|gb|ACO12777.1|	Profilin [Lepeophtheirus salmonis]	0.84	GO:0034059;GO:0035193;GO:0008286;GO:0060250;GO:0007391;GO:0007420;GO:0005737;GO:0007296;GO:0045451;GO:0007488;GO:0030041;GO:0007411;GO:0005158;GO:0005856;GO:0008152;GO:0000915;GO:0045793;GO:0005546;GO:0032507;GO:0030307;GO:0046622;GO:0035159;GO:0007295;GO:0005159;GO:0007285;GO:0051491;GO:0008355;GO:0003779;GO:0008340;GO:0005899;GO:0048133;GO:0042594;GO:0030717;GO:0040018;GO:0007300	_	_	_	_	_	_	K05759	PFN
comp174644_c0_seq3	127	267-647(+)	gi|225709966|gb|ACO10829.1|	Profilin [Caligus rogercresseyi]	0.86	GO:0034059;GO:0035193;GO:0008286;GO:0060250;GO:0007391;GO:0007420;GO:0005737;GO:0007296;GO:0045451;GO:0007488;GO:0030041;GO:0007411;GO:0005158;GO:0005856;GO:0008152;GO:0000915;GO:0045793;GO:0005546;GO:0032507;GO:0030307;GO:0046622;GO:0035159;GO:0007295;GO:0005159;GO:0007285;GO:0051491;GO:0008355;GO:0003779;GO:0008340;GO:0005899;GO:0048133;GO:0042594;GO:0030717;GO:0040018;GO:0007300	7227.FBpp0078866	chickadee; Binds to actin and affects the structure of the cytoskeleton. At high concentrati [...]	0.7698	_	KOG1755	_	K05759	PFN
comp1746896_c0_seq1	477	_	gi|246367206|gb|AAZ80094.3|	hyperpolarization-activated ion channel [Cancer borealis]	0.87	GO:0006813;GO:0005249;GO:0055085;GO:0005622;GO:0014059;GO:0045938;GO:0017071;GO:0007637;GO:0008340;GO:0045475;GO:0005221;GO:0008076	_	_	_	_	_	_	K08282	E2.7.11.1
comp174715_c0_seq1	524	1-1572(-)	gi|512844163|ref|XP_002938891.2|	PREDICTED: xanthine dehydrogenase/oxidase-like isoform X1 [Xenopus (Silurana) tropicalis]	0.69	GO:0097159;GO:1901363;GO:0016725;GO:0044710;GO:0051536;GO:0043167;GO:0019222;GO:0048523;GO:0044238;GO:0009966;GO:0044237;GO:0048856;GO:0045595;GO:0071704;GO:2000026;GO:0050662	_	_	_	_	_	_	K00106	XDH
comp174733_c0_seq1	382	53-1201(+)	gi|195353407|ref|XP_002043196.1|	GM17498 [Drosophila sechellia]	0.57	GO:0016327;GO:0005921;GO:0016324;GO:0005243;GO:0007267;GO:0030727;GO:0007440;GO:0016331;GO:0042048;GO:0010496	_	_	_	_	_	_	None	_
comp174733_c0_seq2	414	53-1297(+)	gi|195353407|ref|XP_002043196.1|	GM17498 [Drosophila sechellia]	0.57	GO:0016327;GO:0005921;GO:0016324;GO:0005243;GO:0007267;GO:0030727;GO:0007440;GO:0016331;GO:0042048;GO:0010496	_	_	_	_	_	_	None	_
comp174770_c0_seq1	870	137-2746(+)	gi|321466204|gb|EFX77201.1|	hypothetical protein DAPPUDRAFT_321679 [Daphnia pulex]	0.77	GO:0008152;GO:0007165;GO:0008081	_	_	_	_	_	_	K01120	E3.1.4.17, PDE
comp174859_c0_seq2	115	76-420(-)	gi|395318321|gb|AFN54260.1|	glutamate dehydrogenase, partial [Tigriopus californicus]	0.92	GO:0004344;GO:0050660;GO:0006118;GO:0006066;GO:0006541;GO:0030018;GO:0008812;GO:0006544;GO:0046168;GO:0006560;GO:0006098;GO:0004353;GO:0031430;GO:0005811;GO:0007629;GO:0005759;GO:0008364;GO:0006116;GO:0046693;GO:0006525;GO:0004352;GO:0005576;GO:0006127;GO:0006641;GO:0051287;GO:0019551;GO:0009060;GO:0004367;GO:0042803;GO:0006566;GO:0006563;GO:0009331	_	_	_	_	_	_	K00261	E1.4.1.3
comp174859_c0_seq3	139	76-492(-)	gi|395318321|gb|AFN54260.1|	glutamate dehydrogenase, partial [Tigriopus californicus]	0.93	GO:0004344;GO:0050660;GO:0006118;GO:0006066;GO:0006541;GO:0030018;GO:0008812;GO:0006544;GO:0046168;GO:0006560;GO:0006098;GO:0004353;GO:0031430;GO:0005811;GO:0007629;GO:0005759;GO:0008364;GO:0006116;GO:0046693;GO:0006525;GO:0004352;GO:0005576;GO:0006127;GO:0006641;GO:0051287;GO:0019551;GO:0009060;GO:0004367;GO:0042803;GO:0006566;GO:0006563;GO:0009331	7739.JGI130686	hypothetical protein	0.8963	_	KOG2250	_	K00261	E1.4.1.3
comp174915_c0_seq3	127	3-386(+)	gi|225713124|gb|ACO12408.1|	Innexin inx2 [Lepeophtheirus salmonis]	0.72	GO:0016327;GO:0005921;GO:0016324;GO:0005243;GO:0007267;GO:0030727;GO:0007440;GO:0016331;GO:0042048;GO:0010496	_	_	_	_	_	_	None	_
comp174990_c0_seq1	145	1-435(-)	gi|383856822|ref|XP_003703906.1|	PREDICTED: ubiquitin-conjugating enzyme E2-17 kDa-like [Megachile rotundata]	0.92	GO:0070936;GO:0010008;GO:0005524;GO:0048132;GO:0007067;GO:0000122;GO:0007179;GO:0005875;GO:0005515;GO:0005829;GO:0030718;GO:0061418;GO:0005886;GO:0045087;GO:0005654;GO:0006281;GO:0006513;GO:0045676;GO:0051276;GO:0070979;GO:0030509;GO:0007286;GO:0006915;GO:0004842;GO:0007140;GO:0031647;GO:0008054;GO:0032480;GO:0006367;GO:0016322	7460.XP_001120139	similar to Ubiquitin-conjugating enzyme E2-17 kDa (Ubiquitin-protein ligase) (Ubiquitin carr [...]	0.9241	COG5078	KOG0417	_	K06689	UBE2D_E, UBC4, UBC5
comp175011_c0_seq1	495	_	gi|332030748|gb|EGI70424.1|	Activated CDC42 kinase 1 [Acromyrmex echinatior]	0.65	GO:0050731;GO:0005634;GO:0004712;GO:0030136;GO:0070436;GO:0005154;GO:0007166;GO:0043005;GO:0005742;GO:0004713;GO:0007264;GO:0005095;GO:0005905;GO:2000369	_	_	_	_	_	_	K08886	TNK2
comp175020_c0_seq1	708	157-2280(+)	gi|332029109|gb|EGI69122.1|	Triple functional domain protein [Acromyrmex echinatior]	0.69	GO:0043087;GO:0005085;GO:0035556;GO:0005488;GO:0016772	_	_	_	_	_	_	K08810	TRIO
comp175086_c0_seq1	131	1-393(-)	gi|225719048|gb|ACO15370.1|	Peptidyl-prolyl cis-trans isomerase A [Caligus clemensi]	0.87	GO:0003755;GO:0030168;GO:0019012;GO:0030496;GO:0002576;GO:0005829;GO:0000413;GO:0005576;GO:0006457;GO:0005634;GO:0019061;GO:0030260;GO:0019076;GO:0050900;GO:0034389;GO:0042277;GO:0050714;GO:0051082;GO:0019048;GO:0045070;GO:0046790;GO:0006278	6945.ISCW008497-PA	cyclophilin A, putative; PPIases accelerate the folding of proteins. It catalyzes the cis-tr [...]	0.8468	COG0652	KOG0865	_	K09565	PPIF
comp175110_c0_seq1	223	59-727(-)	gi|31235339|ref|XP_319221.1|	AGAP010064-PA [Anopheles gambiae str. PEST]	0.97	GO:0005665;GO:0003899;GO:0003677;GO:0005730;GO:0007095;GO:0006144;GO:0006206;GO:0006366	7165.AGAP010064-PA	AGAP010064-PA	0.9665	COG2012	KOG3218	_	K03013	RPB5, POLR2E
comp175122_c0_seq1	64	40-231(+)	gi|511003854|gb|EPB85242.1|	cytochrome c oxidase assembly protein subunit 17 [Mucor circinelloides f. circinelloides 1006PhL]	0.87	GO:0006091;GO:0005758;GO:0016531;GO:0046688;GO:0006825	6085.XP_002170528	similar to Cytochrome c oxidase copper chaperone	0.9167	_	KOG3496	_	K02260	COX17
comp175158_c0_seq1	159	3-479(+)	gi|488567740|ref|XP_004473513.1|	PREDICTED: tyrosine-protein kinase CSK [Dasypus novemcinctus]	0.58	GO:0007596;GO:0006468;GO:0005813;GO:0042997;GO:0002429;GO:0048522;GO:0004713;GO:0001775;GO:0005515;GO:0005794;GO:0005886	_	_	_	_	_	_	K05728	CSK
comp175158_c0_seq2	193	1-579(+)	gi|332235743|ref|XP_003267062.1|	PREDICTED: tyrosine-protein kinase CSK [Nomascus leucogenys]	0.6	GO:0007596;GO:0006468;GO:0005813;GO:0042997;GO:0002429;GO:0048522;GO:0004713;GO:0001775;GO:0005515;GO:0005794;GO:0005886	_	_	_	_	_	_	K05728	CSK
comp175175_c0_seq1	474	_	gi|24661856|ref|NP_729535.1|	visgun, isoform A [Drosophila visgun, isoform B [Drosophila melanogaster]	0.47	GO:0007611	_	_	_	_	_	_	K06546	CD164, MGC24
comp175251_c0_seq1	418	3-1256(-)	gi|478253064|gb|ENN73443.1|	hypothetical protein YQE_09940, partial [Dendroctonus ponderosae]	0.81	GO:0004674;GO:0005524;GO:0007264;GO:0009069;GO:0006468;GO:0005622;GO:0005525	7260.FBpp0251604	GK22461	0.8354	COG0515	_	_	None	_
comp175251_c0_seq2	530	3-1592(-)	gi|270002127|gb|EEZ98574.1|	hypothetical protein TcasGA2_TC001087 [Tribolium castaneum]	0.83	GO:0004674;GO:0005524;GO:0007264;GO:0009069;GO:0006468;GO:0005622;GO:0005525	7245.FBpp0270687	GE25677	0.8457	COG0515	_	_	None	_
comp175251_c0_seq3	123	1-369(-)	gi|345487618|ref|XP_003425729.1|	PREDICTED: LOW QUALITY PROTEIN: leucine-rich repeat serine/threonine-protein kinase 1 [Nasonia vitripennis]	0.89	GO:0004674;GO:0005524;GO:0007264;GO:0009069;GO:0006468;GO:0005622;GO:0005525	_	_	_	_	_	_	None	_
comp175267_c0_seq1	193	76-654(+)	gi|157124049|ref|XP_001660307.1|	rac gtpase [Aedes aegypti]	0.97	GO:0016020;GO:0007264;GO:0005622;GO:0005525	7159.AAEL009732-PA	rac GTPase	0.9688	COG1100	KOG0393	NOG272283	K04392	RAC1
comp1752805_c0_seq1	139	3-419(-)	gi|158296777|ref|XP_317123.4|	AGAP008334-PA [Anopheles gambiae str. PEST]	0.8	GO:0003707;GO:0030522;GO:0005634;GO:0006355;GO:0043565;GO:0008270;GO:0043401;GO:0004879	7739.JGI223708	hypothetical protein	0.7956	_	KOG4218	_	K08558	NR4A2, NURR1
comp175346_c0_seq2	138	1-414(+)	gi|124107288|dbj|BAF45421.1|	cryptochrome precursor [Dianemobius nigrofasciatus]	0.75	GO:0005634;GO:0007165;GO:0006355;GO:0000166;GO:0005737;GO:0048511;GO:0009881	_	_	_	_	_	_	K02295	CRY
comp175346_c0_seq3	118	1-357(+)	gi|62001759|gb|AAX58599.1|	cryptochrome [Danaus plexippus]	0.83	GO:0045892;GO:0009882;GO:0006281;GO:0050660;GO:0000060;GO:0009785;GO:0018298;GO:0048471;GO:0003913;GO:0042752;GO:0005641	_	_	_	_	_	_	K02295	CRY
comp175360_c2_seq1	512	_	gi|321463541|gb|EFX74556.1|	hypothetical protein DAPPUDRAFT_324231 [Daphnia pulex]	0.78	GO:0007399;GO:0006469;GO:0007165;GO:0005515;GO:0004860;GO:0004871;GO:0008047;GO:0043085	_	_	_	_	_	_	None	_
comp175430_c0_seq1	726	1-2178(+)	gi|380029595|ref|XP_003698454.1|	PREDICTED: LOW QUALITY PROTEIN: adenylate cyclase type 9-like [Apis florea]	0.85	GO:0000166;GO:0004016;GO:0006144;GO:0035556;GO:0006171	7460.XP_624914	similar to Adenylyl cyclase 35C CG9210-PA, isoform A	0.8458	COG2114	_	_	K08049	ADCY9
comp175481_c0_seq1	289	2-868(+)	gi|347971984|ref|XP_313775.4|	AGAP004476-PA [Anopheles gambiae str. PEST]	0.8	GO:0016021;GO:0015238;GO:0006855	7165.AGAP004476-PA	AGAP004476-PA	0.8327	_	KOG3764	_	K08155	SLC18A1_2, VMAT
comp175481_c0_seq2	225	2-679(+)	gi|189234210|ref|XP_970834.2|	PREDICTED: similar to AGAP004476-PA [Tribolium castaneum]	0.86	GO:0016021;GO:0015238;GO:0006855	_	_	_	_	_	_	K08155	SLC18A1_2, VMAT
comp175651_c0_seq1	180	18-557(-)	gi|156555197|ref|XP_001603846.1|	PREDICTED: ragulator complex protein LAMTOR1-like [Nasonia vitripennis]	0.71	GO:0031902;GO:0005764;GO:0032008;GO:0071230;GO:0045121;GO:0043410;GO:0042632;GO:0007032;GO:0007040;GO:0001919	_	_	_	_	_	_	None	_
comp175677_c0_seq1	224	417-1088(+)	gi|383858285|ref|XP_003704632.1|	PREDICTED: ras-related and estrogen-regulated growth inhibitor-like [Megachile rotundata]	0.84	GO:0016020;GO:0006184;GO:0007264;GO:0005525;GO:0003924	7460.XP_001119889	similar to CG8519-PA	0.8474	COG1100	KOG0395	_	K00501	TH
comp175677_c0_seq2	224	458-1129(+)	gi|383858285|ref|XP_003704632.1|	PREDICTED: ras-related and estrogen-regulated growth inhibitor-like [Megachile rotundata]	0.84	GO:0016020;GO:0006184;GO:0007264;GO:0005525;GO:0003924	7460.XP_001119889	similar to CG8519-PA	0.8474	COG1100	KOG0395	_	K00501	TH
comp175685_c0_seq1	97	73-363(-)	gi|50289975|ref|XP_447419.1|	hypothetical protein [Candida glabrata CBS 138]	0.77	GO:0007264;GO:0005622;GO:0005525	559295.KLTH0H02222g	KLTH0H02200p	0.7895	COG1100	KOG0070	_	K07977	ARF
comp175685_c0_seq2	106	73-390(-)	gi|255719392|ref|XP_002555976.1|	KLTH0H02222p [Lachancea KLTH0H02222p [Lachancea thermotolerans CBS 6340]	0.79	GO:0007264;GO:0005622;GO:0005525	559295.KLTH0H02222g	KLTH0H02200p	0.7885	COG1100	KOG0070	_	K07977	ARF
comp175685_c0_seq3	157	73-543(-)	gi|255719392|ref|XP_002555976.1|	KLTH0H02222p [Lachancea KLTH0H02222p [Lachancea thermotolerans CBS 6340]	0.86	GO:0007264;GO:0005622;GO:0005525	559295.KLTH0H02222g	KLTH0H02200p	0.8645	COG1100	KOG0070	_	K07977	ARF
comp175702_c0_seq1	423	35-1303(-)	gi|449266407|gb|EMC77460.1|	A/G-specific adenine DNA glycosylase, partial [Columba livia]	0.76	GO:0043231;GO:0006281;GO:0016787;GO:0005488	59729.ENSTGUP00000008159	A/G-specific adenine DNA glycosylase (EC 3.2.2.-)(MutY homolog)(hMYH) [Taeniopygia guttata]	0.7788	COG1194	KOG2457	_	K03575	mutY
comp175739_c0_seq1	447	3-1346(+)	gi|410933241|ref|XP_003980000.1|	PREDICTED: SAM domain and HD domain-containing protein 1-like, partial [Takifugu rubripes]	0.59	GO:0002376;GO:0006952;GO:0003824;GO:0005488	_	_	_	_	_	_	None	_
comp175739_c0_seq2	339	3-1022(+)	gi|410933241|ref|XP_003980000.1|	PREDICTED: SAM domain and HD domain-containing protein 1-like, partial [Takifugu rubripes]	0.6	GO:0002376;GO:0006952;GO:0003824;GO:0005488	_	_	_	_	_	_	None	_
comp175739_c0_seq3	440	3-1325(+)	gi|410933241|ref|XP_003980000.1|	PREDICTED: SAM domain and HD domain-containing protein 1-like, partial [Takifugu rubripes]	0.59	GO:0002376;GO:0006952;GO:0003824;GO:0005488	_	_	_	_	_	_	None	_
comp175739_c0_seq4	447	3-1346(+)	gi|410933241|ref|XP_003980000.1|	PREDICTED: SAM domain and HD domain-containing protein 1-like, partial [Takifugu rubripes]	0.59	GO:0002376;GO:0006952;GO:0003824;GO:0005488	_	_	_	_	_	_	None	_
comp175778_c0_seq1	206	3-623(+)	gi|225711468|gb|ACO11580.1|	Ras-related protein Rab-18 [Caligus rogercresseyi]	0.9	GO:0001654;GO:0007264;GO:0009790;GO:0005525;GO:0015031	8364.ENSXETP00000009896	RAB18, member RAS oncogene family	0.8712	COG1100	KOG0080	_	K07910	RAB18
comp175787_c0_seq1	220	136-795(+)	gi|291239338|ref|XP_002739577.1|	PREDICTED: predicted protein-like [Saccoglossus kowalevskii]	0.99	GO:0007264;GO:0005525;GO:0015031	7739.JGI57441	hypothetical protein	0.9646	COG1100	KOG0097	_	K07881	RAB14
comp175831_c0_seq3	279	2-841(+)	gi|321458840|gb|EFX69901.1|	hypothetical protein DAPPUDRAFT_228516 [Daphnia pulex]	0.63	GO:0051015;GO:0050794;GO:0030048;GO:0042995;GO:0051716;GO:0005938;GO:0003774;GO:0031090;GO:0006897;GO:0005516;GO:0035479;GO:0005654;GO:0007267;GO:0048471;GO:0043531;GO:0006886;GO:0042491;GO:0030139;GO:0048844;GO:0005905;GO:0050974;GO:0046903;GO:0031941	_	_	_	_	_	_	K10358	MYO6
comp175897_c0_seq1	647	570-2510(+)	gi|498983231|ref|XP_004530063.1|	PREDICTED: G protein-coupled receptor kinase 2-like isoform X1 [Ceratitis capitata]	0.84	GO:0007474;GO:0005524;GO:0009069;GO:0006468;GO:0005737;GO:0045879;GO:0007296;GO:0004703;GO:0038032;GO:0009790;GO:0050830;GO:0002805;GO:0005886;GO:0043950;GO:0008592	7165.AGAP004117-PA	AGAP004117-PA	0.8529	COG0515	KOG0986	_	K08291	E2.7.11.16
comp175897_c0_seq2	647	605-2545(+)	gi|498983231|ref|XP_004530063.1|	PREDICTED: G protein-coupled receptor kinase 2-like isoform X1 [Ceratitis capitata]	0.84	GO:0007474;GO:0005524;GO:0009069;GO:0006468;GO:0005737;GO:0045879;GO:0007296;GO:0004703;GO:0038032;GO:0009790;GO:0050830;GO:0002805;GO:0005886;GO:0043950;GO:0008592	7165.AGAP004117-PA	AGAP004117-PA	0.8529	COG0515	KOG0986	_	K08291	E2.7.11.16
comp175900_c0_seq3	125	3-380(+)	gi|405955148|gb|EKC22375.1|	Plasminogen [Crassostrea gigas]	0.68	GO:0000902;GO:0051450;GO:0000187;GO:0001889;GO:0043066;GO:0048012;GO:0005515;GO:0040011;GO:0060665;GO:0070887	_	_	_	_	_	_	None	_
comp175965_c0_seq1	483	54-1505(+)	gi|470302038|ref|XP_004347512.1|	akt protein [Capsaspora owczarzaki ATCC 30864]	0.71	GO:0007165;GO:0005524;GO:0009069;GO:0006468;GO:0004697;GO:0005543	7460.XP_396874	RAC serine/threonine-protein kinase	0.8226	COG0515	KOG0690	_	K04456	AKT
comp175998_c0_seq1	288	102-965(-)	gi|405965246|gb|EKC30641.1|	Hemicentin-1 [Crassostrea gigas]	0.54	GO:0016020;GO:0016787;GO:0050896	_	_	_	_	_	_	None	_
comp176024_c0_seq1	376	30-1157(-)	gi|325911019|gb|ADZ45237.1|	opsin [Tigriopus californicus]	0.74	GO:0038023;GO:0016020;GO:0007165	_	_	_	_	_	_	K04255	OPN4, Rh2_7
comp176040_c0_seq1	131	47-439(-)	gi|209736596|gb|ACI69167.1|	Cell division control protein 42 homolog precursor [Salmo salar]	0.77	GO:0072384;GO:0007596;GO:0051233;GO:0071777;GO:0019901;GO:0043025;GO:0034191;GO:0007015;GO:0051988;GO:0031996;GO:0042074;GO:0007411;GO:0051489;GO:0042059;GO:0072686;GO:0006184;GO:0042802;GO:0030175;GO:0003924;GO:0043005;GO:0048646;GO:0051056;GO:0031333;GO:0010468;GO:0003008;GO:0030216;GO:0031295;GO:0000139;GO:0030496;GO:0001932;GO:0072358;GO:0000166;GO:0007163;GO:0005829;GO:0030225;GO:0051683;GO:…	7955.ENSDARP00000053431	cell division cycle 42 isoform 1	0.7656	COG1100	KOG0393	_	K04393	CDC42
comp176103_c0_seq1	141	2-424(+)	gi|260815483|ref|XP_002602502.1|	hypothetical protein BRAFLDRAFT_281964 [Branchiostoma floridae]	0.87	GO:0005634;GO:0042493;GO:0003677;GO:0005524;GO:0010212;GO:0000733;GO:0051276;GO:0004386;GO:0036310;GO:0000724	_	_	_	_	_	_	K10875	RAD54L, RAD54
comp176174_c0_seq1	206	52-669(+)	gi|225718924|gb|ACO15308.1|	Ras-related protein ORAB-1 [Caligus clemensi]	0.95	GO:0007264;GO:0005525;GO:0015031	45351.JGI167582	hypothetical protein	0.988	COG1100	KOG0084	NOG286713	K07874	RAB1A
comp176175_c0_seq1	676	267-2294(-)	gi|242003622|ref|XP_002422801.1|	cAMP-dependent protein kinase catalytic subunit, putative [Pediculus humanus corporis]	0.89	GO:0004703;GO:0038032;GO:0047696;GO:0005524;GO:0009069;GO:0006468;GO:0005543	121224.XP_002422801	cAMP-dependent protein kinase catalytic subunit, putative (EC:2.7.11.15)	0.9004	COG0515	KOG0986	_	K00910	ADRBK, GRK
comp1762422_c0_seq1	155	1-468(+)	gi|498986898|ref|XP_004530971.1|	PREDICTED: calcium-activated potassium channel slowpoke-like isoform X2 [Ceratitis capitata]	0.61	GO:0016020;GO:0042493;GO:0006813;GO:0005515;GO:0015269;GO:0048512;GO:0043025;GO:0045433;GO:0043005	_	_	_	_	_	_	K04936	KCNMA1
comp176300_c0_seq1	1042	_	gi|225714140|gb|ACO12916.1|	Optic atrophy 3 protein homolog [Lepeophtheirus salmonis]	0.71	GO:0050881;GO:0007626;GO:0005739;GO:0031413	_	_	_	_	_	_	None	_
comp176385_c1_seq1	122	1-369(+)	gi|346644707|ref|NP_001231027.1|	tubulin beta-2C chain [Cricetulus griseus]	1	GO:0005874;GO:0051084;GO:0030496;GO:0005829;GO:0007017;GO:0042288;GO:0042267;GO:0007165;GO:0006184;GO:0005200;GO:0003924;GO:0051258;GO:0006928;GO:0042612;GO:0051082;GO:0005525;GO:0000086	_	_	_	_	_	_	K07375	TUBB
comp176388_c0_seq1	112	225-560(-)	gi|242016119|ref|XP_002428683.1|	10 kDa heat shock protein, putative [Pediculus humanus corporis]	0.86	GO:0006457;GO:0005524;GO:0006950;GO:0005737	7070.XP_975179	similar to CG11267-PA	0.8182	COG0234	KOG1641	_	K04078	groES, HSPE1
comp176401_c0_seq1	483	130-1578(-)	gi|194768849|ref|XP_001966524.1|	GF22218 [Drosophila ananassae]	0.74	GO:0045165;GO:0001744;GO:0030720;GO:0016325;GO:0000136;GO:0033227;GO:0019187;GO:0005887;GO:0042248;GO:0008049;GO:0046662;GO:0045434;GO:0007299;GO:0007298;GO:0007411	_	_	_	_	_	_	K02359	EGH
comp176428_c0_seq8	322	54-1019(-)	gi|353233176|emb|CCD80531.1|	putative zinc finger protein [Schistosoma mansoni]	0.53	GO:0009653;GO:0006355;GO:0005622;GO:0016055;GO:0005488;GO:0044767;GO:0048731	_	_	_	_	_	_	None	_
comp176447_c0_seq1	182	2-550(+)	gi|17647145|ref|NP_523734.1|	Argonaute-1, isoform B [Drosophila argonaute protein [Drosophila melanogaster]	0.88	GO:0005840;GO:0005850;GO:0007416;GO:0003743;GO:0017148;GO:0007367;GO:0007294;GO:0006342;GO:0005634;GO:0035196;GO:0030727;GO:0030422;GO:0006402;GO:0048471;GO:0006446;GO:0036099;GO:0035279;GO:0035198;GO:0016442;GO:0030423;GO:0019899	_	_	_	_	_	_	K11593	ELF2C
comp176463_c0_seq3	409	_	gi|410971825|ref|XP_003992363.1|	PREDICTED: baculoviral IAP repeat-containing protein 3 [Felis catus]	0.78	GO:0034121;GO:0038061;GO:0016567;GO:2000116;GO:0007166;GO:0070424;GO:0005737;GO:0005515;GO:0008270;GO:0005634;GO:0043066;GO:0060546;GO:0042326;GO:0004842;GO:0039535;GO:0043123;GO:0050727;GO:2000378	_	_	_	_	_	_	K04725	BIRC2S
comp176506_c0_seq1	672	_	gi|195589738|ref|XP_002084606.1|	GD12746 [Drosophila simulans]	0.64	GO:0008340;GO:0003954;GO:0006118;GO:0000302	_	_	_	_	_	_	K03961	NDUFB5
comp176570_c0_seq1	771	83-2395(-)	gi|195163093|ref|XP_002022387.1|	GL13008 [Drosophila persimilis]	0.56	GO:0043087;GO:0030036;GO:0009888;GO:0005085;GO:0035556;GO:0005488;GO:0007411	_	_	_	_	_	_	K05730	VAV
comp176574_c0_seq1	2057	_	gi|195133408|ref|XP_002011131.1|	GI16375 [Drosophila mojavensis]	0.72	GO:0007165	_	_	_	_	_	_	None	_
comp176589_c0_seq1	415	103-1347(-)	gi|241047288|ref|XP_002407236.1|	translation initiation factor 4F, helicase subunit, putative [Ixodes scapularis]	0.92	GO:0005840;GO:0003729;GO:0005524;GO:0000339;GO:0008026;GO:0006446;GO:0003743;GO:0005515;GO:0005829;GO:0000289;GO:0019048;GO:0019221;GO:0016281	6945.ISCW015864-PA	translation initiation factor 4F, helicase subunit, putative	0.9404	COG0513	KOG0327	_	K03257	EIF4A
comp176647_c0_seq1	293	1-879(+)	gi|405977794|gb|EKC42228.1|	Arylsulfatase I [Crassostrea gigas]	0.65	GO:0043231;GO:0008209;GO:0004065;GO:0042221;GO:0008210;GO:0044444;GO:0006687	_	_	_	_	_	_	K01135	ARSB
comp176647_c0_seq2	271	2-817(+)	gi|405977794|gb|EKC42228.1|	Arylsulfatase I [Crassostrea gigas]	0.66	GO:0043231;GO:0008209;GO:0004065;GO:0042221;GO:0008210;GO:0044444;GO:0006687	_	_	_	_	_	_	K01135	ARSB
comp176647_c0_seq3	262	1-786(+)	gi|405977794|gb|EKC42228.1|	Arylsulfatase I [Crassostrea gigas]	0.69	GO:0043231;GO:0008209;GO:0004065;GO:0010033;GO:0008210;GO:0044444;GO:0006687	_	_	_	_	_	_	K01135	ARSB
comp176647_c0_seq5	284	2-853(+)	gi|405977794|gb|EKC42228.1|	Arylsulfatase I [Crassostrea gigas]	0.66	GO:0043231;GO:0008209;GO:0004065;GO:0042221;GO:0008210;GO:0044444;GO:0006687	_	_	_	_	_	_	K01135	ARSB
comp176647_c0_seq6	249	1-750(+)	gi|405977794|gb|EKC42228.1|	Arylsulfatase I [Crassostrea gigas]	0.69	GO:0043231;GO:0008209;GO:0004065;GO:0010033;GO:0008210;GO:0044444;GO:0006687	_	_	_	_	_	_	K01135	ARSB
comp176647_c0_seq7	280	1-843(+)	gi|405977794|gb|EKC42228.1|	Arylsulfatase I [Crassostrea gigas]	0.65	GO:0043231;GO:0008209;GO:0004065;GO:0042221;GO:0008210;GO:0044444;GO:0006687	_	_	_	_	_	_	K01135	ARSB
comp176651_c0_seq1	402	323-1528(+)	gi|300122042|emb|CBK22616.2|	unnamed protein product [Blastocystis hominis]	0.6	GO:0003677;GO:0006355;GO:0042221;GO:0044767;GO:0044763;GO:0044424;GO:0048522;GO:0048856;GO:0032501	7070.XP_973934	similar to High mobility group protein DSP1 (Protein dorsal switch 1)	0.7917	COG5648	_	_	K10802	HMGB1
comp176679_c0_seq1	408	2-1228(+)	gi|391338736|ref|XP_003743711.1|	PREDICTED: DNA polymerase subunit gamma-1-like [Metaseiulus occidentalis]	0.56	GO:0022416;GO:0035147;GO:0016323;GO:0060439;GO:0007391;GO:0048812;GO:0005913;GO:0036059;GO:0035156;GO:0030155;GO:0030424;GO:0001745;GO:0050839;GO:0016337;GO:0046331;GO:0005760;GO:0007254;GO:0005917;GO:0006264;GO:0003887;GO:0045177;GO:0035220	_	_	_	_	_	_	K02332	POLG1
comp176727_c0_seq1	243	201-929(-)	gi|91083305|ref|XP_974665.1|	PREDICTED: similar to rab [Tribolium castaneum]	0.85	GO:0007264;GO:0005525	7070.XP_974665	similar to CG12015-PA	0.8744	COG1100	KOG0098	_	None	_
comp176735_c0_seq1	481	1099-2541(-)	gi|156405378|ref|XP_001640709.1|	predicted protein [Nematostella predicted protein [Nematostella vectensis]	0.87	GO:0008601;GO:0007165;GO:0000159	45351.JGI159439	hypothetical protein	0.8721	_	KOG2085	_	K11584	PPP2R5
comp176784_c0_seq1	233	46-744(-)	gi|443704671|gb|ELU01615.1|	hypothetical protein CAPTEDRAFT_163659 [Capitella teleta]	0.75	GO:0006911;GO:0017156;GO:0045335;GO:0048280;GO:0008333;GO:0043312;GO:0030659;GO:0043308;GO:1900483;GO:0005765;GO:0034197;GO:0031902;GO:0048471;GO:0043005;GO:0043001;GO:0005794;GO:0031201;GO:0019905;GO:0045177;GO:0005789;GO:0006888	_	_	_	_	_	_	K08515	VAMP7
comp176850_c0_seq1	183	227-775(-)	gi|91094457|ref|XP_976031.1|	PREDICTED: similar to CG33936 CG33936-PB isoform 2 [Tribolium castaneum]	0.61	GO:0005515;GO:0071356;GO:0042981;GO:0043122	_	_	_	_	_	_	None	_
comp176889_c0_seq1	144	2-433(+)	gi|226425217|gb|ACO53608.1|	glutathione peroxidase [Hypophthalmichthys nobilis]	0.74	GO:0006979;GO:0006804;GO:0004601	28377.ENSACAP00000008114	glutathione peroxidase 1	0.7537	COG0386	KOG1651	_	K00432	E1.11.1.9
comp176949_c0_seq1	313	145-1083(+)	gi|54020700|ref|NP_989708.2|	casein kinase I isoform epsilon [Gallus gallus]	0.97	GO:0005634;GO:0005524;GO:0030178;GO:0009069;GO:0006468;GO:0005737;GO:0032436;GO:0090263;GO:0042752;GO:0004674;GO:0030529;GO:0034613	8364.ENSXETP00000013925	Hypothetical LOC496553	0.982	COG0515	KOG1164	_	K08960	CSNK1E
comp176957_c0_seq1	458	1438-2811(-)	gi|110755131|ref|XP_394432.3|	PREDICTED: serine/threonine-protein kinase NLK [Apis mellifera]	0.86	GO:0007474;GO:0000165;GO:0005524;GO:0030178;GO:0042332;GO:0009069;GO:0006468;GO:0007178;GO:0008586;GO:0016318;GO:0004707;GO:0045887	7460.XP_394432	nemo	0.9024	COG0515	KOG0664	_	K04468	NLK
comp176973_c0_seq1	665	1-1995(-)	gi|443497931|dbj|BAM76759.1|	CLOCK [Gryllus bimaculatus]	0.56	GO:0003677;GO:0007165;GO:0006355;GO:0005737;GO:0046983;GO:0005667;GO:0004871;GO:0045449;GO:0003700	_	_	_	_	_	_	K02223	CLOCK, KAT13D
comp176984_c0_seq1	188	2-565(+)	gi|25527326|gb|AAN73310.1|	heat-shock protein 70 [Cotesia rubecula]	0.88	GO:0005524;GO:0006950	_	_	_	_	_	_	K03283	HSPA1_8
comp177054_c0_seq1	120	3-362(+)	gi|155966240|gb|ABU41074.1|	phospholipid-hydroperoxide glutathione peroxidase [Lepeophtheirus salmonis]	0.82	GO:0006804;GO:0006979;GO:0006749;GO:0004602;GO:0055114	6945.ISCW022517-PA	phospholipid-hydroperoxide glutathione peroxidase, putative	0.8158	COG0386	KOG1651	_	K00432	E1.11.1.9
comp177059_c0_seq1	92	2-277(+)	gi|321459189|gb|EFX70245.1|	hypothetical protein DAPPUDRAFT_300544 [Daphnia pulex]	0.93	GO:0002009;GO:0005737;GO:0009792;GO:0040039;GO:0007264;GO:0018996;GO:0040035;GO:0004871;GO:0005886;GO:0005634;GO:0032940;GO:0006886;GO:0040010;GO:0007281;GO:0010171;GO:0005525;GO:0002119	9031.ENSGALP00000009007	ADP-ribosylation factor 5 ; GTP-binding protein that functions as an allosteric activator of [...]	0.9111	COG1100	KOG0070	_	K07939	ARF4
comp177065_c0_seq1	232	61-759(+)	gi|432874981|ref|XP_004072615.1|	PREDICTED: guanine nucleotide-binding protein subunit alpha-14-like [Oryzias latipes]	0.65	GO:0030424;GO:0030163;GO:0005737;GO:0040017;GO:0043025;GO:0007210;GO:0007212;GO:0005515;GO:0046662;GO:0031234;GO:0002119;GO:0043051	_	_	_	_	_	_	K04634	GNAQ
comp1770917_c0_seq1	201	3-605(-)	gi|390347781|ref|XP_003726866.1|	PREDICTED: LOW QUALITY PROTEIN: peripheral plasma membrane protein CASK-like [Strongylocentrotus purpuratus]	0.95	GO:0010839;GO:0030425;GO:0060170;GO:0016323;GO:0007595;GO:0005524;GO:0042043;GO:0090280;GO:0005730;GO:0005829;GO:0005911;GO:0006144;GO:0015629;GO:0042734;GO:0005516;GO:0061045;GO:0030165;GO:0005604;GO:0005652;GO:0009069;GO:0006468;GO:0016363;GO:0004385;GO:0090288;GO:0006886;GO:0004674;GO:0008022;GO:0045944;GO:0043234;GO:0001953;GO:0032403	7425.XP_001602666	similar to CG6703-PB	0.929	COG0515	_	_	K06103	CASK
comp177148_c0_seq1	425	3-1277(+)	gi|345480342|ref|XP_001606146.2|	PREDICTED: WW domain-containing oxidoreductase-like [Nasonia vitripennis]	0.65	GO:0001649;GO:0030178;GO:0055114;GO:0046983;GO:0008202;GO:0071560;GO:0005829;GO:0006917;GO:0005739;GO:0005886;GO:0048705;GO:0016491;GO:0005634;GO:0005902;GO:0005794;GO:0045944;GO:0019899;GO:0050662	7070.XP_969348	similar to WW domain-containing oxidoreductase	0.7524	COG5021	_	_	None	_
comp177207_c1_seq1	183	1-549(-)	gi|218683621|gb|ACL00839.1|	heat shock protein 70 [Stephos longipes]	0.98	GO:0005524;GO:0006950	_	_	_	_	_	_	K03283	HSPA1_8
comp177208_c0_seq1	290	2-871(+)	gi|507972036|ref|XP_004690919.1|	PREDICTED: serine/threonine-protein kinase Chk2 [Condylura cristata]	0.59	GO:0043229;GO:0000278;GO:0000077;GO:0009069;GO:0006468;GO:0080090;GO:0006351;GO:0060255;GO:0006915;GO:0010332;GO:0005515;GO:0042770;GO:0004674	_	_	_	_	_	_	K06641	CHK2
comp177212_c0_seq5	212	3-638(+)	gi|5532493|gb|AAD44758.1|AF144627_1	SLIT1 [Mus musculus]	0.63	GO:0031290;GO:0005615;GO:0007165;GO:0050919;GO:0010629;GO:0048495;GO:0016049;GO:0033563;GO:0022028;GO:0009887;GO:0040023;GO:0008285	_	_	_	_	_	_	K06838	SLIT1
comp177266_c0_seq1	564	454-2145(+)	gi|242005953|ref|XP_002423824.1|	T-cell activation Rho GTPase-activating protein, putative [Pediculus humanus corporis]	0.82	GO:0007165;GO:0016787;GO:0005622	121224.XP_002423824	T-cell activation Rho GTPase-activating protein, putative	0.814	_	KOG4724	_	None	_
comp177270_c0_seq1	93	340-618(-)	gi|145518399|ref|XP_001445075.1|	hypothetical protein [Paramecium tetraurelia strain d4-2]	0.7	GO:0009306;GO:0035690;GO:0000166;GO:0006888;GO:0005886;GO:0000390	_	_	_	_	_	_	K07874	RAB1A
comp177277_c0_seq1	122	387-755(+)	gi|405972429|gb|EKC37199.1|	Mothers against decapentaplegic-like protein 5 [Crassostrea gigas]	0.98	GO:0007179;GO:0005667;GO:0006355;GO:0045449;GO:0003700	_	_	_	_	_	_	K04676	SMAD1_5_8
comp177277_c0_seq2	122	349-717(+)	gi|405972429|gb|EKC37199.1|	Mothers against decapentaplegic-like protein 5 [Crassostrea gigas]	0.98	GO:0007179;GO:0005667;GO:0006355;GO:0045449;GO:0003700	_	_	_	_	_	_	K04676	SMAD1_5_8
comp177316_c0_seq1	407	479-1699(+)	gi|391343409|ref|XP_003746003.1|	PREDICTED: hepatic leukemia factor-like [Metaseiulus occidentalis]	0.79	GO:0030324;GO:0046982;GO:0007601;GO:0042023;GO:0001077;GO:0005737;GO:0007067;GO:0001892;GO:0043619;GO:0005667;GO:0007584;GO:0048625;GO:0043565;GO:0042415;GO:0007623;GO:0001525;GO:0042803;GO:0007005;GO:0030218;GO:0001666;GO:0002027;GO:0001974;GO:0048469;GO:0035914;GO:0045944;GO:0040007;GO:0008134;GO:0035035;GO:0043129	7222.FBpp0157471	GH23565	0.8283	_	KOG3119	_	K09057	HLF
comp177316_c0_seq2	407	151-1371(+)	gi|391343409|ref|XP_003746003.1|	PREDICTED: hepatic leukemia factor-like [Metaseiulus occidentalis]	0.79	GO:0030324;GO:0046982;GO:0007601;GO:0042023;GO:0001077;GO:0005737;GO:0007067;GO:0001892;GO:0043619;GO:0005667;GO:0007584;GO:0048625;GO:0043565;GO:0042415;GO:0007623;GO:0001525;GO:0042803;GO:0007005;GO:0030218;GO:0001666;GO:0002027;GO:0001974;GO:0048469;GO:0035914;GO:0045944;GO:0040007;GO:0008134;GO:0035035;GO:0043129	7222.FBpp0157471	GH23565	0.8283	_	KOG3119	_	K09057	HLF
comp177319_c0_seq1	375	460-1584(-)	gi|195451519|ref|XP_002072959.1|	GK13878 [Drosophila willistoni]	0.89	GO:0031252;GO:0009880;GO:0007475;GO:0046329;GO:0008270;GO:0007391;GO:0008258	7260.FBpp0243021	GK13878	0.8902	_	KOG2272	_	None	_
comp177321_c0_seq1	260	1-780(-)	gi|198435135|ref|XP_002126574.1|	PREDICTED: DNA mismatch repair protein Msh6 [Ciona intestinalis]	0.41	GO:0044763;GO:0050896;GO:0030983;GO:0006259;GO:0043167	_	_	_	_	_	_	K08737	MSH6
comp177352_c1_seq1	100	255-554(-)	gi|260838242|ref|XP_002613758.1|	hypothetical protein BRAFLDRAFT_123893 [Branchiostoma floridae]	0.99	GO:0046580;GO:0010468;GO:0000922;GO:0046982;GO:0004722;GO:0046677;GO:0005829;GO:0006470;GO:0008543;GO:0000159;GO:0005634;GO:0043066;GO:0000775;GO:0042542;GO:0046872;GO:0008022;GO:0043161	_	_	_	_	_	_	K04382	PPP2C
comp1773967_c0_seq1	375	_	gi|241119262|ref|XP_002402523.1|	vasopressin v1a recpetor, putative [Ixodes scapularis]	0.66	GO:0007165;GO:0004871	_	_	_	_	_	_	None	_
comp1775115_c0_seq1	504	_	gi|348686548|gb|EGZ26363.1|	hypothetical protein PHYSODRAFT_354148 [Phytophthora sojae]	0.95	GO:0043248;GO:0005524;GO:0008233;GO:0051788;GO:0005737;GO:0009965;GO:0017111;GO:0005886;GO:0008540;GO:0035266;GO:0009408;GO:0009933;GO:0046686;GO:0043161;GO:0048829;GO:0010078	2850.JGI41778	hypothetical protein	0.9281	_	_	NOG224784	K03062	PSMC1, RPT2
comp177540_c0_seq1	219	405-1061(-)	gi|333466057|gb|AEF33797.1|	Rab7 [Fenneropenaeus chinensis]	0.92	GO:0007264;GO:0005525;GO:0015031	45351.JGI181611	hypothetical protein	0.9753	COG1100	KOG0394	_	K07897	RAB7A
comp177540_c0_seq2	219	356-1012(-)	gi|333466057|gb|AEF33797.1|	Rab7 [Fenneropenaeus chinensis]	0.92	GO:0007264;GO:0005525;GO:0015031	45351.JGI181611	hypothetical protein	0.9753	COG1100	KOG0394	_	K07897	RAB7A
comp177583_c0_seq1	286	1-858(+)	gi|443720902|gb|ELU10454.1|	hypothetical protein CAPTEDRAFT_50451, partial [Capitella teleta]	0.72	GO:0044260;GO:0046872;GO:0005515;GO:0044238;GO:0006950	_	_	_	_	_	_	K09521	DNAJC1
comp177699_c0_seq1	1753	1-5259(-)	gi|270003787|gb|EFA00235.1|	hypothetical protein TcasGA2_TC003063 [Tribolium castaneum]	0.78	GO:0043087;GO:0035556;GO:0005085	7070.XP_968509	similar to AGAP006107-PA	0.8179	_	KOG4240	_	K15048	KALRN
comp177699_c0_seq2	884	1-2652(-)	gi|270003787|gb|EFA00235.1|	hypothetical protein TcasGA2_TC003063 [Tribolium castaneum]	0.8	GO:0043087;GO:0005622;GO:0035023;GO:0005543;GO:0005089	7070.XP_968509	similar to AGAP006107-PA	0.8086	_	KOG4240	_	K15048	KALRN
comp177700_c0_seq2	533	1294-2892(+)	gi|260784674|ref|XP_002587390.1|	hypothetical protein BRAFLDRAFT_231363 [Branchiostoma floridae]	0.63	GO:0044763;GO:0048523;GO:0007275;GO:0042221;GO:0048856;GO:0005488;GO:0044767	_	_	_	_	_	_	None	_
comp177700_c0_seq3	673	103-2121(+)	gi|260784674|ref|XP_002587390.1|	hypothetical protein BRAFLDRAFT_231363 [Branchiostoma floridae]	0.64	GO:0044763;GO:0048523;GO:0007275;GO:0042221;GO:0048856;GO:0005488;GO:0044767	_	_	_	_	_	_	None	_
comp177712_c0_seq1	793	1-2379(+)	gi|347963411|ref|XP_310900.5|	AGAP000232-PA [Anopheles gambiae str. PEST]	0.75	GO:0007186	7165.AGAP000232-PA	AGAP000232-PA	0.7751	_	KOG3589	_	None	_
comp177712_c0_seq2	807	1-2421(+)	gi|347963411|ref|XP_310900.5|	AGAP000232-PA [Anopheles gambiae str. PEST]	0.75	GO:0007186	7165.AGAP000232-PA	AGAP000232-PA	0.7751	_	KOG3589	_	None	_
comp177743_c2_seq1	487	_	gi|432901134|ref|XP_004076821.1|	PREDICTED: tubulin alpha chain-like [Oryzias latipes]	0.97	GO:0005881;GO:0006184;GO:0051084;GO:0005200;GO:0003924;GO:0051258;GO:0005515;GO:0051301;GO:0007017;GO:0071353;GO:0005525;GO:0030705	_	_	_	_	_	_	K07374	TUBA
comp177751_c0_seq1	196	256-843(-)	gi|321462928|gb|EFX73948.1|	hypothetical protein DAPPUDRAFT_307551 [Daphnia pulex]	0.94	GO:0016020;GO:0007264;GO:0004767;GO:0005622;GO:0005525;GO:0006687	7159.AAEL015271-PA	rac GTPase	0.9538	COG1100	KOG0393	_	K04392	RAC1
comp177767_c0_seq1	1216	192-3839(-)	gi|321479256|gb|EFX90212.1|	adenylyl cyclase [Daphnia pulex]	0.84	GO:0000166;GO:0004016;GO:0006144;GO:0016021;GO:0035556;GO:0006171	13616.ENSMODP00000022859	adenylate cyclase 5	0.8883	COG2114	KOG3619	_	K08046	ADCY6
comp177769_c0_seq1	1933	178-5976(-)	gi|507984348|ref|XP_004695246.1|	PREDICTED: methyl-CpG-binding protein 2 [Condylura cristata]	0.65	GO:0030182;GO:0065008;GO:0006355;GO:0044767;GO:0044710;GO:0003676;GO:0016570;GO:0048522;GO:0031324;GO:0007268;GO:0050905;GO:0010605;GO:0051239;GO:0007611	_	_	_	_	_	_	K11588	MECP2
comp177774_c0_seq1	193	1-579(-)	gi|321478323|gb|EFX89280.1|	hypothetical protein DAPPUDRAFT_303141 [Daphnia pulex]	0.83	GO:0005622;GO:0043547;GO:0051056;GO:0005096	_	_	_	_	_	_	None	_
comp177795_c0_seq1	1426	391-4668(-)	gi|443725887|gb|ELU13287.1|	hypothetical protein CAPTEDRAFT_184398 [Capitella teleta]	0.72	GO:0005524;GO:0009069;GO:0006468;GO:0006996;GO:0007254;GO:0048522;GO:0004674;GO:0008270	7668.XP_795174	similar to mitogen activated protein kinase kinase kinase 1	0.7681	COG0515	KOG0198	_	K04416	MAP3K1, MEKK1
comp177803_c0_seq1	150	42-491(+)	gi|254939725|gb|ACT88125.1|	AT15141p [Drosophila melanogaster]	1	GO:0030425;GO:0007528;GO:0030048;GO:0051533;GO:0016477;GO:0043274;GO:2001020;GO:0016061;GO:0004683;GO:0031489;GO:0031996;GO:0032465;GO:0051489;GO:0005513;GO:0031476;GO:0006468;GO:0046331;GO:0007099;GO:0043277;GO:0040010;GO:0008049;GO:0006898;GO:0016060;GO:0007052;GO:0042052;GO:0051726;GO:0031475;GO:0005954;GO:0048786;GO:0000922;GO:0016028;GO:0005524;GO:0051296;GO:0007616;GO:0009792;GO:0030496;GO:…	7739.JGI132038	hypothetical protein; Calmodulin mediates the control of a large number of enzymes and other [...]	1	COG5126	KOG0027	NOG277755	K02183	CALM
comp177805_c0_seq1	463	492-1880(+)	gi|242020256|ref|XP_002430571.1|	dual specificity protein phosphatase, putative [Pediculus humanus corporis]	0.73	GO:0043409;GO:0032872;GO:0008138;GO:0006470;GO:0009892;GO:0033549;GO:0050776	7070.XP_974007	similar to dual specificity phosphatase 10	0.7538	COG2453	_	_	K04459	DUSP, MKP
comp177809_c0_seq1	193	12-590(-)	gi|156366819|ref|XP_001627119.1|	predicted protein [Nematostella predicted protein [Nematostella vectensis]	0.84	GO:0016020;GO:0016787;GO:0007264;GO:0005622;GO:0005525	45351.JGI172175	hypothetical protein	0.8413	COG1100	KOG0393	NOG272283	K04392	RAC1
comp177811_c0_seq1	435	239-1543(+)	gi|157109041|ref|XP_001650498.1|	lipin [Aedes aegypti]	0.73	GO:0019217;GO:0030514;GO:0005634;GO:0007474;GO:0005737;GO:0042594;GO:0055088;GO:0035183;GO:0019432	_	_	_	_	_	_	K15728	LPIN
comp177816_c0_seq1	133	215-613(+)	gi|195329730|ref|XP_002031563.1|	GM26067 [Drosophila sechellia]	0.52	GO:0050794;GO:0016043;GO:0007309;GO:0060810;GO:0003002;GO:0050896;GO:0005488	_	_	_	_	_	_	K12898	HNRNPF_H
comp177846_c0_seq2	206	1-618(-)	gi|499025191|ref|XP_004563348.1|	PREDICTED: tubulin alpha-1A chain-like isoform X2 [Maylandia zebra]	1	GO:0045298;GO:0006184;GO:0005813;GO:0005200;GO:0007094;GO:0019730;GO:0003924;GO:0051258;GO:0000235;GO:0007052;GO:0005525	_	_	_	_	_	_	K07374	TUBA
comp177846_c0_seq4	206	1-618(-)	gi|499025191|ref|XP_004563348.1|	PREDICTED: tubulin alpha-1A chain-like isoform X2 [Maylandia zebra]	1	GO:0045298;GO:0006184;GO:0005813;GO:0005200;GO:0007094;GO:0019730;GO:0003924;GO:0051258;GO:0000235;GO:0007052;GO:0005525	_	_	_	_	_	_	K07374	TUBA
comp177853_c0_seq4	169	1-510(+)	gi|193603712|ref|XP_001950301.1|	PREDICTED: rho GTPase-activating protein 1-like [Acyrthosiphon pisum]	0.84	GO:0007165;GO:0005622	_	_	_	_	_	_	None	_
comp177853_c0_seq7	128	3-389(+)	gi|193603712|ref|XP_001950301.1|	PREDICTED: rho GTPase-activating protein 1-like [Acyrthosiphon pisum]	0.83	GO:0007165;GO:0005622	_	_	_	_	_	_	None	_
comp1778801_c0_seq1	153	3-464(+)	gi|505779041|ref|XP_004603221.1|	PREDICTED: 1-phosphatidylinositol 4,5-bisphosphate phosphodiesterase eta-1 [Sorex araneus]	0.71	GO:0009395;GO:0016020;GO:0050429;GO:0005829;GO:0007242;GO:0048015;GO:0005488	_	_	_	_	_	_	None	_
comp177908_c1_seq1	111	1-333(+)	gi|290562623|gb|ADD38707.1|	Heat shock factor-binding protein 1 [Lepeophtheirus salmonis]	0.72	GO:0006950	7176.CPIJ010982-PA	heat shock factor binding protein	0.8644	_	KOG4117	_	None	_
comp177919_c0_seq2	395	1306-2490(-)	gi|321461942|gb|EFX72969.1|	hypothetical protein DAPPUDRAFT_308031 [Daphnia pulex]	0.89	GO:0007165;GO:0005524;GO:0009069;GO:0006468;GO:0004697	6945.ISCW017707-PA	serine/threonine protein kinase, putative	0.8988	COG0515	KOG0605	_	K08790	STK38, NDR
comp177941_c0_seq1	363	_	gi|465957654|gb|EMP27501.1|	AP-2 complex subunit mu-1, partial [Chelonia mydas]	0.99	GO:0048011;GO:0016044;GO:0016192;GO:0030669;GO:0005515;GO:0005829;GO:0005739;GO:0007411;GO:0042059;GO:0005765;GO:0050690;GO:0030131;GO:0016032;GO:0008289;GO:0006886;GO:0030132;GO:0030141;GO:0019886;GO:0007268;GO:0005215	_	_	_	_	_	_	K11826	AP2M1
comp177957_c0_seq1	201	640-1242(+)	gi|112983376|ref|NP_001036993.1|	ras-like protein 2 [Bombyx mori]	0.85	GO:0016020;GO:0006184;GO:0007264;GO:0005525;GO:0003924	7070.XP_975587	similar to Ras-like protein 2	0.8656	COG1100	KOG0395	_	K07830	RRAS2, TC21
comp178025_c0_seq1	104	174-485(-)	gi|91083979|ref|XP_975179.1|	PREDICTED: similar to AGAP001502-PA [Tribolium castaneum]	0.85	GO:0006457;GO:0005524;GO:0006950;GO:0005737	7070.XP_975179	similar to CG11267-PA	0.8485	COG0234	KOG1641	_	K04078	groES, HSPE1
comp178084_c0_seq1	567	_	gi|389608679|dbj|BAM17949.1|	synaptobrevin [Papilio xuthus]	0.91	GO:0030054;GO:0090316;GO:0017156;GO:0006944;GO:0070044;GO:0016079;GO:0017157;GO:0030672;GO:0016021;GO:0009749;GO:0005516;GO:0005886;GO:0017075;GO:0005802;GO:0048471;GO:0043005;GO:0005543;GO:0042589;GO:0032869;GO:0070032;GO:0043001;GO:0008022;GO:0016459;GO:0017022;GO:0006461;GO:0032403;GO:0070033	8364.ENSXETP00000019954	vesicle-associated membrane protein 2 (synaptobrevin 2)	0.907	_	KOG0860	_	K13504	VAMP2
comp178084_c0_seq2	503	_	gi|389608679|dbj|BAM17949.1|	synaptobrevin [Papilio xuthus]	0.78	GO:0030054;GO:0090316;GO:0017156;GO:0006944;GO:0070044;GO:0016079;GO:0017157;GO:0030672;GO:0016021;GO:0009749;GO:0005516;GO:0005886;GO:0017075;GO:0005802;GO:0048471;GO:0043005;GO:0005543;GO:0042589;GO:0032869;GO:0070032;GO:0043001;GO:0008022;GO:0016459;GO:0017022;GO:0006461;GO:0032403;GO:0070033	8364.ENSXETP00000019954	vesicle-associated membrane protein 2 (synaptobrevin 2)	0.907	_	KOG0860	_	K13504	VAMP2
comp178092_c0_seq1	169	118-627(+)	gi|426248942|ref|XP_004018212.1|	PREDICTED: apoptogenic protein 1, mitochondrial [Ovis aries]	0.67	GO:0043280;GO:0090200;GO:0097193;GO:0005739;GO:0034393	_	_	_	_	_	_	None	_
comp178121_c0_seq1	554	2-1663(+)	gi|45383826|ref|NP_989476.1|	ATP-binding cassette sub-family A member 1 [Gallus gallus]	0.69	GO:0016020;GO:0016043;GO:0065008;GO:0030301;GO:0044281;GO:1901360;GO:0022892;GO:0005515;GO:0010033;GO:1901576;GO:0044249;GO:0042157;GO:0043231;GO:0007165;GO:0051649;GO:0044444	28377.ENSACAP00000012855	annotation not avaliable	0.7822	COG1131	_	_	K05641	ABCA1
comp178123_c0_seq1	207	1-621(-)	gi|167843233|gb|ACA03523.1|	heat shock protein 70 precursor [Tigriopus japonicus]	0.9	GO:0006457;GO:0005524;GO:0051082;GO:0006950	_	_	_	_	_	_	K04043	dnaK
comp17812_c0_seq1	140	2-424(+)	gi|91076308|ref|XP_969307.1|	PREDICTED: similar to Endoprotease FURIN [Tribolium castaneum]	0.92	GO:0016020;GO:0004252;GO:0007169;GO:0005524;GO:0006508;GO:0006468;GO:0004714	_	_	_	_	_	_	None	_
comp178130_c0_seq3	366	1-1098(+)	gi|383863286|ref|XP_003707112.1|	PREDICTED: calpain-D-like [Megachile rotundata]	0.86	GO:0007399;GO:0004198;GO:0006508;GO:0008270;GO:0007632;GO:0005737	7460.XP_624008	calpain-D	0.8548	_	KOG0045	_	K08582	CAPN15
comp178196_c0_seq1	285	2-856(-)	gi|399894431|gb|AFP54307.1|	heat shock protein 70 cognate [Lycorma delicatula]	0.94	GO:0005524;GO:0006950	_	_	_	_	_	_	K03283	HSPA1_8
comp178199_c0_seq1	181	2-544(+)	gi|115715434|ref|XP_784183.2|	PREDICTED: F-box/WD repeat-containing protein 1A [Strongylocentrotus purpuratus]	0.98	GO:0031146;GO:0045893;GO:0019005;GO:0046983;GO:0005829;GO:0006470;GO:0031648;GO:0000209;GO:0045892;GO:0005634;GO:0045862;GO:0005813;GO:0004842;GO:0042347;GO:0016055;GO:0042753;GO:0007049	9361.ENSDNOP00000006494	F-box and WD repeat domain containing 11	0.9748	COG2319	_	_	K03362	FBXW1_11, BTRC, beta-TRCP
comp178199_c0_seq2	177	2-532(+)	gi|115715434|ref|XP_784183.2|	PREDICTED: F-box/WD repeat-containing protein 1A [Strongylocentrotus purpuratus]	0.98	GO:0031146;GO:0045893;GO:0019005;GO:0046983;GO:0005829;GO:0006470;GO:0031648;GO:0000209;GO:0045892;GO:0005634;GO:0045862;GO:0005813;GO:0004842;GO:0042347;GO:0016055;GO:0042753;GO:0007049	9361.ENSDNOP00000006494	F-box and WD repeat domain containing 11	0.9748	COG2319	_	_	K03362	FBXW1_11, BTRC, beta-TRCP
comp178199_c0_seq3	182	2-547(+)	gi|443689211|gb|ELT91658.1|	hypothetical protein CAPTEDRAFT_148311 [Capitella teleta]	0.97	GO:0031146;GO:0045893;GO:0019005;GO:0046983;GO:0005829;GO:0006470;GO:0031648;GO:0000209;GO:0045892;GO:0005634;GO:0045862;GO:0005813;GO:0004842;GO:0042347;GO:0016055;GO:0042753;GO:0007049	9361.ENSDNOP00000006494	F-box and WD repeat domain containing 11	0.9748	COG2319	_	_	K03362	FBXW1_11, BTRC, beta-TRCP
comp178199_c0_seq4	191	2-574(+)	gi|115715434|ref|XP_784183.2|	PREDICTED: F-box/WD repeat-containing protein 1A [Strongylocentrotus purpuratus]	0.97	GO:0031146;GO:0060444;GO:0045893;GO:0019005;GO:0046983;GO:0045309;GO:0071407;GO:0005829;GO:0006470;GO:0031648;GO:0000209;GO:0045892;GO:0005634;GO:0045862;GO:0033598;GO:0005813;GO:0004842;GO:0061136;GO:0016342;GO:0042347;GO:0042753;GO:0051726;GO:0008013	9031.ENSGALP00000040404	F-box and WD-40 domain protein 11	0.9748	COG2319	_	_	K03362	FBXW1_11, BTRC, beta-TRCP
comp178209_c0_seq2	284	32-883(+)	gi|225712442|gb|ACO12067.1|	Lipid phosphate phosphohydrolase 1 [Lepeophtheirus salmonis]	0.54	GO:0005319;GO:0042577;GO:0007281;GO:0006869;GO:0007280;GO:0035233;GO:0007277;GO:0045177;GO:0005886	_	_	_	_	_	_	K01080	PPAP2
comp178225_c0_seq1	150	133-582(-)	gi|225713626|gb|ACO12659.1|	cAMP-responsive element-binding protein-like 2 [Lepeophtheirus salmonis]	0.69	GO:0005634;GO:0007165;GO:0045600;GO:0045893;GO:0046326;GO:0033138;GO:0050821;GO:0046889	_	_	_	_	_	_	None	_
comp178225_c0_seq2	133	133-531(-)	gi|225713626|gb|ACO12659.1|	cAMP-responsive element-binding protein-like 2 [Lepeophtheirus salmonis]	0.76	GO:0005634;GO:0007165;GO:0045600;GO:0045893;GO:0046326;GO:0033138;GO:0050821;GO:0046889	_	_	_	_	_	_	None	_
comp178241_c0_seq1	900	_	gi|442565876|gb|AGC56218.1|	heat shock protein 70 [Dermatophagoides farinae]	0.97	GO:0005524;GO:0006950	_	_	_	_	_	_	K03283	HSPA1_8
comp178243_c1_seq1	369	57-1163(-)	gi|225709786|gb|ACO10739.1|	Replication factor C subunit 3 [Caligus rogercresseyi]	0.87	GO:0005663;GO:0003677;GO:0046683;GO:0005524;GO:0006260;GO:0006200;GO:0016887	7955.ENSDARP00000072835	replication factor C (activator 1) 3	0.8362	COG0470	KOG2035	_	K10756	RFC3_5
comp178260_c0_seq1	147	43-483(-)	gi|321456896|gb|EFX67993.1|	hypothetical protein DAPPUDRAFT_189492 [Daphnia pulex]	0.94	GO:0016020;GO:0035556	7159.AAEL007332-PA	cornichon protein, putative	0.9091	_	KOG2729	_	None	_
comp178260_c0_seq2	812	_	gi|321456896|gb|EFX67993.1|	hypothetical protein DAPPUDRAFT_189492 [Daphnia pulex]	0.94	GO:0016020;GO:0035556	7159.AAEL007332-PA	cornichon protein, putative	0.9091	_	KOG2729	_	None	_
comp178315_c0_seq1	188	1-567(+)	gi|157132400|ref|XP_001662554.1|	eukaryotic translation initiation factor 2c [Aedes aegypti]	0.61	GO:0007416;GO:0017148;GO:0007367;GO:0007294;GO:0006342;GO:0005634;GO:0035196;GO:0030727;GO:0030422;GO:0006402;GO:0048471;GO:0035279;GO:0036099;GO:0035198;GO:0030529;GO:0030423;GO:0019899	_	_	_	_	_	_	K11593	ELF2C
comp178315_c0_seq2	189	1-570(+)	gi|157132400|ref|XP_001662554.1|	eukaryotic translation initiation factor 2c [Aedes aegypti]	0.61	GO:0007416;GO:0017148;GO:0007367;GO:0007294;GO:0006342;GO:0005634;GO:0035196;GO:0030727;GO:0030422;GO:0006402;GO:0048471;GO:0035279;GO:0036099;GO:0035198;GO:0030529;GO:0030423;GO:0019899	_	_	_	_	_	_	K11593	ELF2C
comp178330_c0_seq2	1004	114-3125(-)	gi|157131409|ref|XP_001662235.1|	receptor protein-tyrosine phosphatase 10d [Aedes aegypti]	0.72	GO:0030424;GO:0007165;GO:0004728;GO:0005001;GO:0008045;GO:0007417;GO:0007616;GO:0007424;GO:0006470;GO:0045177;GO:0006570;GO:0005886	7159.AAEL012083-PA	receptor protein-tyrosine phosphatase 10d	0.8333	COG5599	_	_	K01104	E3.1.3.48
comp178352_c0_seq1	903	157-2865(+)	gi|91080533|ref|XP_972324.1|	PREDICTED: similar to alpha actinin CG4376-PB [Tribolium castaneum]	0.91	GO:0051015;GO:0007629;GO:0031532;GO:0005925;GO:0051764;GO:0045214;GO:0007016;GO:0030018;GO:0005509;GO:0051017	7070.XP_972324	similar to CG4376-PB, isoform B	0.8889	COG5069	KOG0035	_	K05699	ACTN
comp178371_c0_seq1	146	100-537(-)	gi|483521764|gb|EOB06721.1|	Histone H2B 1/2/3/4/6, partial [Anas platyrhynchos]	0.7	GO:0035267;GO:0003677;GO:0050829;GO:0005811;GO:0005576;GO:0006334;GO:0050830;GO:0000786	99883.ENSTNIP00000011441	Chromosome 7 SCAF14557, whole genome shotgun sequence; Core component of nucleosome. Nucleos [...]	0.8161	_	KOG1744	_	None	_
comp178417_c0_seq1	264	146-937(+)	gi|321460806|gb|EFX71844.1|	hypothetical protein DAPPUDRAFT_326737 [Daphnia pulex]	0.93	GO:0045859;GO:0046958;GO:0007095;GO:0046982;GO:0042313;GO:0005737;GO:0007088;GO:0005875;GO:0008426;GO:0007411;GO:0008103;GO:0045927;GO:0007294;GO:0005634;GO:0009411;GO:0048190;GO:0005694;GO:0045172;GO:0008340;GO:0019904;GO:0007280;GO:0004497;GO:0007265	7159.AAEL011116-PC	14-3-3 protein sigma, gamma, zeta, beta/alpha	0.9612	COG5040	KOG0841	_	K06630	YWHA
comp1784258_c0_seq1	595	_	gi|291238472|ref|XP_002739153.1|	PREDICTED: protein phosphatase 5, catalytic subunit-like [Saccoglossus kowalevskii]	0.82	GO:0010017;GO:0009506;GO:0005635;GO:0004722;GO:0008287;GO:0046686;GO:0046872;GO:0006913;GO:0005515;GO:0019031;GO:0005829;GO:0030176;GO:0006470	3702.AT2G42810.2-P	PP5.2 (PROTEIN PHOSPHATASE 5.2); phosphoprotein phosphatase/ protein binding / protein serin [...]	0.8144	COG0639	KOG0376	_	K04460	PPP5C, PP5
comp178431_c0_seq1	418	17-1270(-)	gi|328705159|ref|XP_001942991.2|	PREDICTED: hypothetical protein LOC100163311 [Acyrthosiphon pisum]	0.62	GO:0016020;GO:0007165;GO:0005230;GO:0004872;GO:0006811	_	_	_	_	_	_	None	_
comp178437_c0_seq1	206	1-618(-)	gi|383853764|ref|XP_003702392.1|	PREDICTED: SLIT-ROBO Rho GTPase-activating protein 1 [Megachile rotundata]	0.62	GO:0007165;GO:0005622	_	_	_	_	_	_	K07526	SRGAP
comp178437_c0_seq2	189	3-569(-)	gi|383853764|ref|XP_003702392.1|	PREDICTED: SLIT-ROBO Rho GTPase-activating protein 1 [Megachile rotundata]	0.62	GO:0007165;GO:0005622	_	_	_	_	_	_	K07526	SRGAP
comp178471_c0_seq2	563	2-1693(+)	gi|242014445|ref|XP_002427901.1|	kif1, putative [Pediculus humanus corporis]	0.79	GO:0007528;GO:0008345;GO:0005874;GO:0048490;GO:0000166;GO:0003777;GO:0016188;GO:0007411;GO:0005871;GO:0047496	_	_	_	_	_	_	K10392	KIF1S
comp178471_c0_seq4	604	2-1816(+)	gi|242014445|ref|XP_002427901.1|	kif1, putative [Pediculus humanus corporis]	0.77	GO:0007528;GO:0008345;GO:0005874;GO:0048490;GO:0000166;GO:0003777;GO:0016188;GO:0007411;GO:0005871;GO:0047496	_	_	_	_	_	_	K10392	KIF1S
comp178477_c0_seq1	83	2-250(+)	gi|241852260|ref|XP_002415824.1|	26S proteasome complex subunit DSS1, putative [Ixodes scapularis]	0.83	GO:0006508;GO:0000502;GO:0008233;GO:0000724;GO:0032039	6945.ISCW014665-PA	26S proteasome complex subunit DSS1, putative	0.831	_	KOG4764	NOG264034;NOG274762	K10881	SHFM1, DSS1
comp178477_c0_seq3	85	1-255(+)	gi|241852260|ref|XP_002415824.1|	26S proteasome complex subunit DSS1, putative [Ixodes scapularis]	0.83	GO:0006508;GO:0000502;GO:0008233;GO:0000724;GO:0032039	6945.ISCW014665-PA	26S proteasome complex subunit DSS1, putative	0.831	_	KOG4764	NOG264034;NOG274762	K10881	SHFM1, DSS1
comp178479_c0_seq1	1893	84-5762(-)	gi|91092226|ref|XP_970548.1|	PREDICTED: similar to plexin A CG11081-PA [Tribolium castaneum]	0.82	GO:0007165;GO:0004872;GO:0007275;GO:0005622;GO:0016021	7070.XP_970548	plexin A	0.8248	_	KOG3610	_	K06820	PLXNA
comp178479_c0_seq2	1933	660-6458(-)	gi|91092226|ref|XP_970548.1|	PREDICTED: similar to plexin A CG11081-PA [Tribolium castaneum]	0.82	GO:0007165;GO:0004872;GO:0007275;GO:0005622;GO:0016021	7070.XP_970548	plexin A	0.8258	_	KOG3610	_	K06820	PLXNA
comp178480_c0_seq2	217	667-1317(-)	gi|52346076|ref|NP_001005081.1|	casein kinase 2, beta polypeptide [Xenopus (Silurana) tropicalis]	0.99	GO:0045859;GO:0005956;GO:0005102;GO:0005737;GO:0033211;GO:0061154;GO:0010862;GO:0005667;GO:0019887;GO:0005886;GO:0032927;GO:0016301;GO:0042802;GO:0030177;GO:0046872;GO:0019904;GO:0007249;GO:0031519;GO:0043537;GO:0008134	28377.ENSACAP00000005637	Lymphocyte antigen 6 complex locus protein G5b Precursor	0.9904	COG5041	KOG3092	_	K03115	CSNK2B
comp178480_c0_seq3	218	471-1124(-)	gi|52346076|ref|NP_001005081.1|	casein kinase 2, beta polypeptide [Xenopus (Silurana) tropicalis]	0.99	GO:0045859;GO:0005956;GO:0005102;GO:0005737;GO:0033211;GO:0061154;GO:0010862;GO:0005667;GO:0019887;GO:0005886;GO:0032927;GO:0016301;GO:0042802;GO:0030177;GO:0046872;GO:0019904;GO:0007249;GO:0031519;GO:0043537;GO:0008134	28377.ENSACAP00000005637	Lymphocyte antigen 6 complex locus protein G5b Precursor	0.9904	COG5041	KOG3092	_	K03115	CSNK2B
comp1784942_c0_seq1	401	_	gi|340710406|ref|XP_003393782.1|	PREDICTED: neuropeptides capa receptor-like [Bombus terrestris]	0.87	GO:0001607;GO:0007268;GO:0016021;GO:0007218;GO:0050254;GO:0007187	_	_	_	_	_	_	K05053	NMUR2
comp1785176_c0_seq1	144	1-435(+)	gi|115361507|gb|ABI95854.1|	GABA-alpha subunit [Lepeophtheirus salmonis]	0.94	GO:0006821;GO:0005230;GO:0007214;GO:0016021;GO:0030054;GO:0004890;GO:0005886;GO:0045211	_	_	_	_	_	_	K05195	GLRA3
comp178523_c0_seq1	251	2-754(+)	gi|391348101|ref|XP_003748290.1|	PREDICTED: serine/threonine-protein kinase PLK2-like [Metaseiulus occidentalis]	0.61	GO:0050794;GO:0043231;GO:0033554;GO:0016310;GO:0044267;GO:0005515;GO:0004672;GO:0022402	_	_	_	_	_	_	K08862	PLK3, CNK
comp178523_c0_seq2	220	2-664(+)	gi|391348101|ref|XP_003748290.1|	PREDICTED: serine/threonine-protein kinase PLK2-like [Metaseiulus occidentalis]	0.61	GO:0043231;GO:0009069;GO:0006468;GO:0043491;GO:0000075;GO:0005515;GO:0004674;GO:0006974	_	_	_	_	_	_	K08862	PLK3, CNK
comp178551_c0_seq1	361	66-1148(+)	gi|225711228|gb|ACO11460.1|	Mitogen-activated protein kinase 14 [Caligus rogercresseyi]	0.88	GO:0051525;GO:0051146;GO:0000922;GO:0019395;GO:0005524;GO:0030316;GO:0005667;GO:0071363;GO:0005829;GO:0005739;GO:0031663;GO:0004707;GO:0090400;GO:0006006;GO:0000902;GO:0000165;GO:0001525;GO:2000379;GO:0000077;GO:0032495;GO:0009069;GO:0007178;GO:0002062;GO:0018105;GO:0042770;GO:0045648;GO:0071479;GO:0045944;GO:0048010;GO:0007519;GO:0042307	9600.ENSPPYP00000018500	mitogen-activated protein kinase 14	0.8448	COG0515	KOG0660	_	K04441	P38
comp178551_c0_seq2	361	66-1148(+)	gi|290462535|gb|ADD24315.1|	Mitogen-activated protein kinase 14 [Lepeophtheirus salmonis]	0.88	GO:0000165;GO:0005524;GO:0009069;GO:0006468;GO:0006950;GO:0007178;GO:0004707	9600.ENSPPYP00000018500	mitogen-activated protein kinase 14	0.8391	COG0515	KOG0660	_	K04441	P38
comp178567_c0_seq1	750	122-2371(+)	gi|471357929|ref|XP_004369552.1|	PREDICTED: protein kinase C epsilon type [Trichechus manatus latirostris]	0.78	GO:0016020;GO:0046872;GO:0005524;GO:0009069;GO:0006468;GO:0004697;GO:0035556	7070.XP_974683	similar to CG1954-PA	0.849	COG0515	KOG0694	_	K06068	NPKC
comp178573_c0_seq1	467	1-1401(-)	gi|302813407|ref|XP_002988389.1|	hypothetical protein SELMODRAFT_269402 [Selaginella moellendorffii]	0.53	GO:0006950;GO:0003824;GO:0009987;GO:0006629	_	_	_	_	_	_	None	_
comp178578_c0_seq1	742	514-2739(+)	gi|345495570|ref|XP_001604867.2|	PREDICTED: ral guanine nucleotide dissociation stimulator-like [Nasonia vitripennis]	0.7	GO:0007264	_	_	_	_	_	_	None	_
comp178578_c0_seq2	933	175-2973(+)	gi|345495570|ref|XP_001604867.2|	PREDICTED: ral guanine nucleotide dissociation stimulator-like [Nasonia vitripennis]	0.7	GO:0007264	_	_	_	_	_	_	None	_
comp178614_c0_seq3	197	1-594(+)	gi|449496377|ref|XP_002194980.2|	PREDICTED: xanthine dehydrogenase/oxidase [Taeniopygia guttata]	0.64	GO:0097159;GO:1901363;GO:0051716;GO:0016725;GO:0006139;GO:0044710;GO:0051536;GO:0019222;GO:0046872;GO:0048523;GO:0043170;GO:0007275;GO:0048856;GO:0050662	_	_	_	_	_	_	K00106	XDH
comp178697_c0_seq1	257	47-817(-)	gi|506968897|gb|AGM32792.1|	putative exosome complex exonuclease RRP41 [Coptotermes formosanus]	0.84	GO:0005634;GO:0017091;GO:0051607;GO:0035327;GO:0030307;GO:0071028;GO:0000460;GO:0071044;GO:0009022;GO:0045006;GO:0000178	6945.ISCW017199-PA	exosomal 3'-5' exoribonuclease complex, subunit Rrp41, putative	0.8074	COG0689	KOG1068	NOG285081	K11600	RRP41, EXOSC4, SKI6
comp178698_c1_seq1	1035	_	gi|6680331|ref|NP_032342.1|	checkpoint protein HUS1 [Mus hus1+-like [Mus musculus]	0.63	GO:0007093;GO:0001932;GO:0005634;GO:0000077;GO:0009411;GO:0009790;GO:0000724;GO:0008156	_	_	_	_	_	_	K10903	HUS1
comp178732_c0_seq1	505	_	gi|293344537|ref|XP_002725812.1|	PREDICTED: cell cycle checkpoint control protein RAD9A-like [Rattus norvegicus]	0.65	GO:0031981;GO:0000075;GO:0043232;GO:0006974;GO:0019899	_	_	_	_	_	_	K10994	RAD9A
comp178733_c0_seq1	216	46-693(+)	gi|290462207|gb|ADD24151.1|	Ras-related protein Rab-11A [Lepeophtheirus salmonis]	0.91	GO:0007264;GO:0005525;GO:0015031	7460.XP_623997	Rab-protein 11	0.9052	COG1100	KOG0087	_	K07904	RAB11A
comp178743_c0_seq1	126	36-413(+)	gi|170031585|ref|XP_001843665.1|	conserved hypothetical protein [Culex quinquefasciatus]	0.7	GO:0015888;GO:0015403;GO:0005886	_	_	_	_	_	_	K11792	DDA1
comp178743_c0_seq2	141	61-483(+)	gi|325303240|tpg|DAA34756.1|	TPA_inf: Det1 complexing ubiquitin ligase [Amblyomma variegatum]	0.65	GO:0015888;GO:0015403;GO:0005886	_	_	_	_	_	_	K11792	DDA1
comp178743_c0_seq3	126	36-413(+)	gi|170031585|ref|XP_001843665.1|	conserved hypothetical protein [Culex quinquefasciatus]	0.7	GO:0015888;GO:0015403;GO:0005886	_	_	_	_	_	_	K11792	DDA1
comp178801_c0_seq1	913	985-3723(+)	gi|307176717|gb|EFN66133.1|	Focal adhesion kinase 1 [Camponotus floridanus]	0.77	GO:0016310;GO:0007165;GO:0000166;GO:0004672	7460.XP_001120873	focal adhesion kinase 56D ortholog	0.8871	COG0515	KOG4257	_	K05725	PTK2, FAK
comp178801_c0_seq2	718	985-3138(+)	gi|307176717|gb|EFN66133.1|	Focal adhesion kinase 1 [Camponotus floridanus]	0.79	GO:0005856;GO:0004713;GO:0005925;GO:0005524;GO:0006468;GO:0004871;GO:0007172	7460.XP_001120873	focal adhesion kinase 56D ortholog	0.8871	COG0515	_	_	None	_
comp178801_c0_seq3	778	985-3318(+)	gi|307176717|gb|EFN66133.1|	Focal adhesion kinase 1 [Camponotus floridanus]	0.79	GO:0005856;GO:0004713;GO:0005925;GO:0005524;GO:0006468;GO:0004871;GO:0007172	7460.XP_001120873	focal adhesion kinase 56D ortholog	0.8871	COG0515	_	_	None	_
comp178837_c0_seq2	335	635-1642(+)	gi|260806983|ref|XP_002598363.1|	hypothetical protein BRAFLDRAFT_163666 [Branchiostoma floridae]	0.77	GO:0035690;GO:0000122;GO:0043116;GO:0019934;GO:0008144;GO:0005886;GO:0043117;GO:0030553;GO:0005634;GO:0033159;GO:0046069;GO:0004118;GO:0071321;GO:0043005;GO:0019933;GO:0048471;GO:0036006;GO:0006198;GO:0097011	6945.ISCW011071-PA	cyclic nucleotide phosphodiesterase, putative	0.7699	_	KOG3689	_	K01120	E3.1.4.17, PDE
comp178837_c0_seq4	528	2-1588(+)	gi|260806983|ref|XP_002598363.1|	hypothetical protein BRAFLDRAFT_163666 [Branchiostoma floridae]	0.77	GO:0035690;GO:0000122;GO:0043116;GO:0019934;GO:0008144;GO:0005886;GO:0043117;GO:0030553;GO:0005634;GO:0033159;GO:0046069;GO:0004118;GO:0071321;GO:0019933;GO:0048471;GO:0036006;GO:0006198;GO:0097011	7739.JGI163666	hypothetical protein	0.7758	_	KOG3689	_	K01120	E3.1.4.17, PDE
comp178839_c0_seq1	222	11-676(-)	gi|380025847|ref|XP_003696675.1|	PREDICTED: ubiquinone biosynthesis protein COQ7 homolog isoform 1 [Apis florea]	0.79	GO:0007399;GO:0043231;GO:0009653;GO:0006744;GO:0046914;GO:0043009;GO:0055114;GO:0007568;GO:0048869;GO:0006979;GO:0016491	7460.XP_392748	ubiquinone biosynthesis protein COQ7	0.7895	COG2941	KOG4061	_	K06134	COQ7
comp178863_c0_seq1	265	1-795(-)	gi|260804101|ref|XP_002596927.1|	hypothetical protein BRAFLDRAFT_58397 [Branchiostoma floridae]	0.98	GO:0045298;GO:0006184;GO:0000910;GO:0005813;GO:0005200;GO:0007094;GO:0019730;GO:0003924;GO:0051258;GO:0005515;GO:0005811;GO:0000235;GO:0007052;GO:0005525	7739.JGI58397	annotation not available	0.9849	COG5023	KOG1376	_	K07374	TUBA
comp178863_c0_seq2	172	1-516(-)	gi|2098757|gb|AAC47525.1|	alpha-4-tubulin, partial [Gecarcinus lateralis]	0.99	GO:0045298;GO:0006184;GO:0005813;GO:0005200;GO:0007094;GO:0019730;GO:0003924;GO:0051258;GO:0000235;GO:0007052;GO:0005525	_	_	_	_	_	_	K07374	TUBA
comp1789085_c0_seq1	416	_	gi|340369993|ref|XP_003383531.1|	PREDICTED: xanthine dehydrogenase/oxidase-like [Amphimedon queenslandica]	0.58	GO:0010044;GO:0007595;GO:0051537;GO:0010627;GO:0009968;GO:0050660;GO:0004854;GO:0055114;GO:0048522;GO:0043546;GO:0005515;GO:0005829;GO:0031323;GO:0010605;GO:0045453;GO:0030856;GO:0004855;GO:0046872;GO:0045596;GO:0009115	_	_	_	_	_	_	K00106	XDH
comp178922_c0_seq1	246	1-738(-)	gi|359372673|gb|AEV42205.1|	cytosolic heat shock protein 90kDa [Eurytemora affinis]	0.96	GO:0006457;GO:0005524;GO:0051082;GO:0006950	7460.C1JYH6	Heat shock protein 90	0.9228	COG0326	KOG0019	_	K04079	htpG, HSP90A
comp178922_c0_seq2	293	1-879(-)	gi|359372673|gb|AEV42205.1|	cytosolic heat shock protein 90kDa [Eurytemora affinis]	0.96	GO:0006457;GO:0005524;GO:0051082;GO:0006950	7460.C1JYH6	Heat shock protein 90	0.9181	COG0326	KOG0019	_	K04079	htpG, HSP90A
comp178933_c0_seq1	226	2-682(+)	gi|507701290|ref|XP_004715398.1|	PREDICTED: serine/threonine-protein kinase Chk2 [Echinops telfairi]	0.56	GO:0050794;GO:0044260;GO:0019538;GO:0006974	_	_	_	_	_	_	K06641	CHK2
comp178950_c0_seq1	397	_	gi|312378724|gb|EFR25220.1|	hypothetical protein AND_09643 [Anopheles darlingi]	0.88	GO:0030382;GO:0055085;GO:0016006;GO:0008308;GO:0005741;GO:0006839;GO:0044070;GO:0007602;GO:0005875;GO:0005811;GO:0007291	_	_	_	_	_	_	K15040	VDAC2
comp178967_c0_seq2	200	83-685(+)	gi|357615874|gb|EHJ69879.1|	innexin [Danaus plexippus]	0.7	GO:0016327;GO:0005921;GO:0016324;GO:0005243;GO:0007267;GO:0030727;GO:0007440;GO:0016331;GO:0042048;GO:0010496	_	_	_	_	_	_	None	_
comp178970_c0_seq1	1353	1068-5126(-)	gi|242008333|ref|XP_002424961.1|	LBC oncogene, putative [Pediculus humanus corporis]	0.66	GO:0035556	_	_	_	_	_	_	K12331	ARHGEF11
comp178970_c0_seq2	1388	1068-5231(-)	gi|242008333|ref|XP_002424961.1|	LBC oncogene, putative [Pediculus humanus corporis]	0.66	GO:0035556	_	_	_	_	_	_	K12331	ARHGEF11
comp1789952_c0_seq1	138	3-416(-)	gi|195339291|ref|XP_002036253.1|	GM17077 [Drosophila sechellia]	0.52	GO:0016020;GO:0005515;GO:0008038;GO:0007411;GO:0065007	_	_	_	_	_	_	K06842	SEMA6
comp178999_c0_seq1	120	2-361(+)	gi|123585|sp|P27541.1|HSP70_BRUMA	RecName: Full=Heat shock 70 kDa protein heat shock protein 70 [Brugia malayi]	0.88	GO:0005524;GO:0006950	_	_	_	_	_	_	K03283	HSPA1_8
comp179030_c0_seq1	310	13-942(+)	gi|19112732|ref|NP_595940.1|	serine/threonine protein phosphatase Ppa2 [Schizosaccharomyces pombe 972h-]	0.74	GO:0018991;GO:0035188;GO:0009792;GO:0007126;GO:0005515;GO:0016787;GO:0007052;GO:0040007;GO:0002119	_	_	_	_	_	_	K04382	PPP2C
comp179061_c0_seq1	564	496-2187(-)	gi|321457554|gb|EFX68638.1|	hypothetical protein DAPPUDRAFT_17011 [Daphnia pulex]	0.81	GO:0007426;GO:0048750;GO:0035147;GO:0035001;GO:0046843;GO:0035151;GO:0005700;GO:0031987;GO:0000122;GO:0017053;GO:0002121;GO:0003682;GO:0007298;GO:0045467;GO:0001709;GO:0040003;GO:0001964;GO:0000978;GO:0000785;GO:0048854;GO:0042803;GO:0001078;GO:0048813;GO:0007476;GO:0046872;GO:0048053;GO:0016476;GO:0045944;GO:0042675;GO:0007422;GO:0000980	7165.AGAP003537-PA	AGAP003537-PA	0.7642	_	KOG4441	_	K09237	K09237
comp179076_c0_seq1	275	2-829(+)	gi|410898916|ref|XP_003962943.1|	PREDICTED: serine/threonine-protein kinase pim-1-like [Takifugu rubripes]	0.68	GO:0061179;GO:0007346;GO:0004674;GO:0005515;GO:0009069;GO:0006468;GO:0043066	_	_	_	_	_	_	K08807	PIM3
comp179095_c0_seq1	246	75-812(-)	gi|321465242|gb|EFX76244.1|	hypothetical protein DAPPUDRAFT_188571 [Daphnia pulex]	0.77	GO:0007219	7955.ENSDARP00000095097	ubiquitin carboxyl-terminal esterase L3 (ubiquitin thiolesterase)	0.75	_	KOG1415	_	K05609	UCHL3, YUH1
comp179097_c0_seq1	138	336-749(+)	gi|319738719|gb|ADV59550.1|	selenium-dependent glutathione peroxidase [Paracyclopina nana]	0.8	GO:0006804;GO:0006979;GO:0006749;GO:0004602;GO:0055114	10228.JGI63884	expressed hypothetical protein	0.7591	COG0386	KOG1651	_	K00432	E1.11.1.9
comp179125_c0_seq2	176	1-528(+)	gi|478254391|gb|ENN74643.1|	hypothetical protein YQE_08762, partial [Dendroctonus ponderosae]	0.74	GO:0016310;GO:0032513;GO:0032092;GO:0033017;GO:0034205;GO:0042110;GO:0032925;GO:0006458;GO:0014802;GO:0055010;GO:0005528;GO:0060315;GO:0003755;GO:0048185;GO:0022417;GO:0007183;GO:0007179;GO:0005219;GO:0005829;GO:0000413;GO:0043206;GO:0034713;GO:0050776;GO:0030424;GO:0019855;GO:0009069;GO:0005024;GO:0031398;GO:0051280;GO:0043123;GO:0044325;GO:0048180;GO:0060347;GO:0046332;GO:0042026	_	_	_	_	_	_	K09568	FKBP1
comp179132_c0_seq3	703	_	gi|321479400|gb|EFX90356.1|	hypothetical protein DAPPUDRAFT_300066 [Daphnia pulex]	0.79	GO:0007275;GO:0016055	6945.ISCW003981-PA	conserved hypothetical protein	0.8101	_	KOG3577	_	K02222	SFRP5
comp179143_c0_seq1	126	64-441(-)	gi|242007836|ref|XP_002424726.1|	Profilin, putative [Pediculus humanus corporis]	0.71	GO:0034059;GO:0035193;GO:0008286;GO:0060250;GO:0007391;GO:0007420;GO:0007296;GO:0044424;GO:0045451;GO:0007488;GO:0030041;GO:0007411;GO:0005158;GO:0008152;GO:0000915;GO:0045793;GO:0005546;GO:0032507;GO:0030307;GO:0046622;GO:0035159;GO:0007295;GO:0005159;GO:0007285;GO:0051491;GO:0008355;GO:0003779;GO:0008340;GO:0005899;GO:0048133;GO:0042594;GO:0030717;GO:0040018;GO:0007300	_	_	_	_	_	_	K05759	PFN
comp179143_c0_seq2	126	73-450(-)	gi|242007836|ref|XP_002424726.1|	Profilin, putative [Pediculus humanus corporis]	0.71	GO:0034059;GO:0035193;GO:0008286;GO:0060250;GO:0007391;GO:0007420;GO:0007296;GO:0044424;GO:0045451;GO:0007488;GO:0030041;GO:0007411;GO:0005158;GO:0008152;GO:0000915;GO:0045793;GO:0005546;GO:0032507;GO:0030307;GO:0046622;GO:0035159;GO:0007295;GO:0005159;GO:0007285;GO:0051491;GO:0008355;GO:0003779;GO:0008340;GO:0005899;GO:0048133;GO:0042594;GO:0030717;GO:0040018;GO:0007300	_	_	_	_	_	_	K05759	PFN
comp179153_c0_seq1	615	3-1847(-)	gi|390349091|ref|XP_003727146.1|	PREDICTED: frizzled-4-like [Strongylocentrotus purpuratus]	0.56	GO:0007166;GO:0004871	_	_	_	_	_	_	K02354	FZD4, fz4
comp179176_c0_seq1	184	1-552(-)	gi|225709212|gb|ACO10452.1|	GTP-binding protein Rit2 [Caligus rogercresseyi]	0.85	GO:0006184;GO:0006970;GO:0009408;GO:0003924;GO:0006979;GO:0042594;GO:0007264;GO:0005516;GO:0005525;GO:0005886	7237.FBpp0275781	GA21063	0.8352	COG1100	KOG0395	_	K07847	REM1
comp179176_c0_seq2	227	1-681(-)	gi|225709212|gb|ACO10452.1|	GTP-binding protein Rit2 [Caligus rogercresseyi]	0.82	GO:0006184;GO:0006970;GO:0009408;GO:0003924;GO:0006979;GO:0042594;GO:0007264;GO:0005516;GO:0005525;GO:0005886	7237.FBpp0275781	GA21063	0.7626	COG1100	KOG0395	_	K07847	REM1
comp179176_c0_seq3	219	1-657(-)	gi|225709212|gb|ACO10452.1|	GTP-binding protein Rit2 [Caligus rogercresseyi]	0.81	GO:0016020;GO:0006184;GO:0007264;GO:0005525;GO:0003924	7165.AGAP005159-PA	AGAP005159-PA	0.8191	COG1100	KOG0395	_	K07847	REM1
comp179186_c0_seq1	407	101-1321(+)	gi|383859668|ref|XP_003705314.1|	PREDICTED: uncharacterized protein LOC100877025 [Megachile rotundata]	0.78	GO:0007165;GO:0005899;GO:0005158	7460.XP_001122793	similar to fibroblast growth factor receptor substrate 2	0.8936	_	KOG4047	_	None	_
comp179186_c0_seq2	302	101-1009(+)	gi|383859668|ref|XP_003705314.1|	PREDICTED: uncharacterized protein LOC100877025 [Megachile rotundata]	0.78	GO:0007165;GO:0005899;GO:0005158	7460.XP_001122793	similar to fibroblast growth factor receptor substrate 2	0.8936	_	KOG4047	_	None	_
comp179191_c0_seq4	121	88-453(+)	gi|350417191|ref|XP_003491301.1|	PREDICTED: neurobeachin-like [Bombus impatiens]	0.9	GO:0007528;GO:0051018;GO:0005737;GO:0008355;GO:0043025;GO:0016319;GO:0016021;GO:0008104;GO:0042675	_	_	_	_	_	_	None	_
comp179207_c0_seq1	156	2-469(-)	gi|383856822|ref|XP_003703906.1|	PREDICTED: ubiquitin-conjugating enzyme E2-17 kDa-like [Megachile rotundata]	0.95	GO:0070936;GO:0010008;GO:0005524;GO:0048132;GO:0007067;GO:0000122;GO:0007179;GO:0005875;GO:0005515;GO:0005829;GO:0030718;GO:0061418;GO:0005886;GO:0045087;GO:0005654;GO:0006281;GO:0006513;GO:0045676;GO:0051276;GO:0070979;GO:0030509;GO:0007286;GO:0006915;GO:0004842;GO:0007140;GO:0031647;GO:0008054;GO:0032480;GO:0006367;GO:0016322	7460.XP_001120139	similar to Ubiquitin-conjugating enzyme E2-17 kDa (Ubiquitin-protein ligase) (Ubiquitin carr [...]	0.9456	COG5078	KOG0417	_	K06689	UBE2D_E, UBC4, UBC5
comp179207_c0_seq2	154	643-1104(-)	gi|383856822|ref|XP_003703906.1|	PREDICTED: ubiquitin-conjugating enzyme E2-17 kDa-like [Megachile rotundata]	0.95	GO:0070936;GO:0010008;GO:0005524;GO:0048132;GO:0007067;GO:0000122;GO:0007179;GO:0005875;GO:0005515;GO:0005829;GO:0030718;GO:0061418;GO:0005886;GO:0045087;GO:0005654;GO:0006281;GO:0006513;GO:0045676;GO:0051276;GO:0070979;GO:0030509;GO:0007286;GO:0006915;GO:0004842;GO:0007140;GO:0031647;GO:0008054;GO:0032480;GO:0006367;GO:0016322	7460.XP_001120139	similar to Ubiquitin-conjugating enzyme E2-17 kDa (Ubiquitin-protein ligase) (Ubiquitin carr [...]	0.9456	COG5078	KOG0417	_	K06689	UBE2D_E, UBC4, UBC5
comp179208_c0_seq1	186	114-671(+)	gi|260801543|ref|XP_002595655.1|	hypothetical protein BRAFLDRAFT_200579 [Branchiostoma floridae]	0.6	GO:0005634;GO:0035335;GO:0045931;GO:0004725;GO:0000188;GO:0001772;GO:0033549;GO:0050860;GO:0070373;GO:0005829;GO:0008138;GO:0046329;GO:0002756;GO:0050868;GO:0006570	_	_	_	_	_	_	K14165	K14165
comp179218_c0_seq2	261	1-786(+)	gi|225713792|gb|ACO12742.1|	Longitudinals lacking protein-like [Lepeophtheirus salmonis]	0.71	GO:0007426;GO:0048750;GO:0035147;GO:0035001;GO:0046843;GO:0035151;GO:0005700;GO:0031987;GO:0017053;GO:0002121;GO:0003682;GO:0007298;GO:0045467;GO:0045892;GO:0001709;GO:0040003;GO:0001964;GO:0000978;GO:0000785;GO:0048854;GO:0042803;GO:0001078;GO:0048813;GO:0007476;GO:0048053;GO:0016476;GO:0045944;GO:0042675;GO:0007422;GO:0000980	_	_	_	_	_	_	K09237	K09237
comp179227_c0_seq1	293	2-880(+)	gi|113205550|ref|NP_001037884.1|	nth endonuclease III-like 1 [Xenopus (Silurana) tropicalis]	0.76	GO:0043231;GO:0003677;GO:0016787;GO:0006284	31033.ENSTRUP00000023329	nth endonuclease III-like 1 (E. coli)	0.7511	COG0177	KOG1921	_	K10773	NTH
comp179252_c1_seq1	159	3-479(-)	gi|194578819|ref|NP_001124136.1|	uncharacterized protein LOC100170830 precursor [Danio rerio]	0.58	GO:0007165;GO:0000166	_	_	_	_	_	_	None	_
comp179262_c0_seq1	798	410-2803(-)	gi|321475734|gb|EFX86696.1|	hypothetical protein DAPPUDRAFT_312971 [Daphnia pulex]	0.79	GO:0046872;GO:0031901;GO:0005829;GO:0032266;GO:0007175	99883.ENSTNIP00000020495	zinc finger, FYVE domain containing 28	0.7552	_	KOG1819	_	None	_
comp179271_c0_seq2	181	3-545(-)	gi|393906557|gb|EJD74319.1|	CBR-NHR-88 protein [Loa loa]	0.63	GO:0005634;GO:0005488;GO:0045471	_	_	_	_	_	_	K14030	NR2B4, usp
comp179283_c0_seq1	463	_	gi|225710658|gb|ACO11175.1|	Histone H4 [Caligus rogercresseyi]	1	GO:0005654;GO:0003677;GO:0051298;GO:0046982;GO:0045653;GO:0005730;GO:0005811;GO:0005576;GO:0015629;GO:0034080;GO:0048015;GO:0000786;GO:0000723	9361.ENSDNOP00000015675	annotation not avaliable	1	COG2036	KOG3467	_	K11254	H4
comp179283_c0_seq2	485	_	gi|225710658|gb|ACO11175.1|	Histone H4 [Caligus rogercresseyi]	1	GO:0005654;GO:0003677;GO:0051298;GO:0046982;GO:0045653;GO:0005730;GO:0005811;GO:0005576;GO:0015629;GO:0034080;GO:0048015;GO:0000786;GO:0000723	9361.ENSDNOP00000015675	annotation not avaliable	1	COG2036	KOG3467	_	K11254	H4
comp179283_c0_seq6	52	2-157(+)	gi|12845285|dbj|BAB26692.1|	unnamed protein product [Mus musculus]	1	GO:0005654;GO:0003677;GO:0051298;GO:0046982;GO:0045653;GO:0005730;GO:0005811;GO:0005576;GO:0015629;GO:0034080;GO:0048015;GO:0000786;GO:0000723	9361.ENSDNOP00000015675	annotation not avaliable	1	COG2036	KOG3467	_	K11254	H4
comp179283_c0_seq8	419	_	gi|225710658|gb|ACO11175.1|	Histone H4 [Caligus rogercresseyi]	1	GO:0005654;GO:0003677;GO:0051298;GO:0046982;GO:0045653;GO:0005730;GO:0005811;GO:0005576;GO:0015629;GO:0034080;GO:0048015;GO:0000786;GO:0000723	9361.ENSDNOP00000015675	annotation not avaliable	1	COG2036	KOG3467	_	K11254	H4
comp179315_c0_seq1	356	418-1485(+)	gi|388462225|gb|AFK32778.1|	guanine nucleotide-binding protein Gq alpha subunit [Bemisia tabaci]	0.96	GO:0007186;GO:0031683;GO:0001664;GO:0006184;GO:0005525;GO:0004871;GO:0003924	7460.XP_623369	similar to G protein 49B CG17759-PH, isoform H	0.9632	_	KOG0085	_	K04634	GNAQ
comp179315_c0_seq2	356	418-1485(+)	gi|388462225|gb|AFK32778.1|	guanine nucleotide-binding protein Gq alpha subunit [Bemisia tabaci]	0.96	GO:0007186;GO:0031683;GO:0001664;GO:0006184;GO:0005525;GO:0004871;GO:0003924	7460.XP_623369	similar to G protein 49B CG17759-PH, isoform H	0.9632	_	KOG0085	_	K04634	GNAQ
comp179371_c0_seq1	158	33-506(+)	gi|348538663|ref|XP_003456810.1|	PREDICTED: deoxyuridine 5'-triphosphate nucleotidohydrolase-like [Oreochromis niloticus]	0.82	GO:0005634;GO:0014070;GO:0046081;GO:0001889;GO:0006226;GO:0043497;GO:0042975;GO:0005829;GO:2000272;GO:0030547;GO:0006206;GO:0005739;GO:0032556;GO:0004170;GO:0070207	7165.AGAP010159-PA	AGAP010159-PA	0.8273	COG0756	KOG3370	_	K01520	E3.6.1.23, dut
comp179371_c0_seq2	158	33-506(+)	gi|348538663|ref|XP_003456810.1|	PREDICTED: deoxyuridine 5'-triphosphate nucleotidohydrolase-like [Oreochromis niloticus]	0.82	GO:0005634;GO:0014070;GO:0046081;GO:0001889;GO:0006226;GO:0043497;GO:0042975;GO:0005829;GO:2000272;GO:0030547;GO:0006206;GO:0005739;GO:0032556;GO:0004170;GO:0070207	7165.AGAP010159-PA	AGAP010159-PA	0.8273	COG0756	KOG3370	_	K01520	E3.6.1.23, dut
comp179386_c0_seq1	65	99-293(-)	gi|225718918|gb|ACO15305.1|	Guanine nucleotide-binding protein subunit gamma-e precursor [Caligus clemensi]	0.89	GO:0007186;GO:0005834;GO:0007601;GO:0004871	7159.AAEL006685-PA	G-protein, gamma-subunit, putative	0.8525	_	KOG4119	_	K04547	GNG13
comp179386_c0_seq2	510	_	gi|225718918|gb|ACO15305.1|	Guanine nucleotide-binding protein subunit gamma-e precursor [Caligus clemensi]	0.89	GO:0007186;GO:0005834;GO:0007601;GO:0004871	7159.AAEL006685-PA	G-protein, gamma-subunit, putative	0.8548	_	KOG4119	_	K04547	GNG13
comp179425_c0_seq1	383	272-1420(-)	gi|321472408|gb|EFX83378.1|	hypothetical protein DAPPUDRAFT_315899 [Daphnia pulex]	0.85	GO:0046579;GO:0000164	7070.XP_968188	similar to shoc2	0.8447	COG4886	KOG0619	_	None	_
comp179452_c0_seq1	188	1-564(-)	gi|321465918|gb|EFX76917.1|	hypothetical protein DAPPUDRAFT_106641 [Daphnia pulex]	0.96	GO:0007264;GO:0005525;GO:0015031	7425.XP_001600682	similar to ras-related protein Rab-8A, putative	0.9505	COG1100	KOG0078	_	K07901	RAB8A, MEL
comp179452_c0_seq2	198	1-594(-)	gi|321465918|gb|EFX76917.1|	hypothetical protein DAPPUDRAFT_106641 [Daphnia pulex]	0.86	GO:0007264;GO:0005525;GO:0015031	7425.XP_001600682	similar to ras-related protein Rab-8A, putative	0.8516	COG1100	KOG0078	_	K07901	RAB8A, MEL
comp179460_c0_seq1	210	947-1576(-)	gi|307189589|gb|EFN73950.1|	Ras-related protein Rab-6A [Camponotus floridanus]	0.95	GO:0007264;GO:0005525;GO:0015031	7425.XP_001604718	similar to rab6	0.9388	COG1100	KOG0094	_	K07976	RAB
comp179460_c0_seq2	210	546-1175(-)	gi|307189589|gb|EFN73950.1|	Ras-related protein Rab-6A [Camponotus floridanus]	0.95	GO:0007264;GO:0005525;GO:0015031	7425.XP_001604718	similar to rab6	0.9388	COG1100	KOG0094	_	K07976	RAB
comp179468_c0_seq1	290	47-916(-)	gi|242011218|ref|XP_002426352.1|	DNA-directed RNA polymerase II 33 kDa polypeptide, putative [Pediculus humanus corporis]	0.91	GO:0005665;GO:0005703;GO:0003677;GO:0005737;GO:0034605;GO:0006366;GO:0046983;GO:0003899;GO:0005730;GO:0005875;GO:0006144;GO:0006206	7227.FBpp0080121	RNA polymerase II 33kD subunit	0.8909	COG0202	KOG1522	_	K03011	RPB3, POLR2C
comp1794750_c0_seq1	122	2-370(+)	gi|291234645|ref|XP_002737259.1|	PREDICTED: wingless-type MMTV integration site family member 4 [Saccoglossus kowalevskii]	0.83	GO:0048599;GO:0009952;GO:0060129;GO:0005615;GO:0072164;GO:0008584;GO:0001658;GO:0060126;GO:0009798;GO:0005886;GO:0007492;GO:0001656;GO:0040037;GO:0051145;GO:0005578;GO:0008585;GO:0072033;GO:0060070;GO:0001664;GO:0005794;GO:0060748	_	_	_	_	_	_	K00408	WNT4
comp179485_c0_seq1	292	1-876(-)	gi|47224960|emb|CAF97375.1|	unnamed protein product [Tetraodon nigroviridis]	0.83	GO:0044424;GO:0005524;GO:0050896;GO:0003676;GO:0008026	_	_	_	_	_	_	K14442	DHX36, RHAU
comp179534_c0_seq1	1253	_	gi|307106096|gb|EFN54343.1|	hypothetical protein CHLNCDRAFT_135593 [Chlorella variabilis]	0.52	GO:0016020;GO:0016571;GO:0048437;GO:0071944;GO:0060255;GO:0009628;GO:0043167;GO:0043067;GO:0016787;GO:0044255;GO:0004672;GO:0048229;GO:1901576;GO:0045087;GO:0044249;GO:0018024;GO:1901363;GO:0097159;GO:0005634;GO:0042221;GO:0006139;GO:0048438;GO:0010467;GO:0006554;GO:0044444	_	_	_	_	_	_	K02519	infB, MTIF2
comp179534_c0_seq2	523	_	gi|307106096|gb|EFN54343.1|	hypothetical protein CHLNCDRAFT_135593 [Chlorella variabilis]	0.52	GO:0016020;GO:0016571;GO:0048437;GO:0071944;GO:0060255;GO:0009628;GO:0043167;GO:0043067;GO:0016787;GO:0044255;GO:0004672;GO:0048229;GO:1901576;GO:0045087;GO:0044249;GO:0018024;GO:1901363;GO:0097159;GO:0005634;GO:0042221;GO:0006139;GO:0048438;GO:0010467;GO:0006554;GO:0044444	_	_	_	_	_	_	K02519	infB, MTIF2
comp179537_c0_seq1	261	1-783(+)	gi|195168496|ref|XP_002025067.1|	GL26847 [Drosophila persimilis]	0.51	GO:0000003;GO:0006810;GO:0048522;GO:0010646;GO:0032501;GO:0023051;GO:0048583	_	_	_	_	_	_	None	_
comp179587_c0_seq1	439	205-1521(-)	gi|505791838|ref|XP_004606006.1|	PREDICTED: platelet-activating factor acetylhydrolase [Sorex araneus]	0.57	GO:0009395;GO:0034440;GO:0090026;GO:0034374;GO:0034362;GO:0005543;GO:0006954;GO:0034441;GO:0047499	_	_	_	_	_	_	K01062	E3.1.1.47, PAFAH
comp179593_c0_seq1	283	1-852(+)	gi|498962636|ref|XP_004525043.1|	PREDICTED: LOW QUALITY PROTEIN: flotillin-2-like [Ceratitis capitata]	0.86	GO:0035011;GO:0007155;GO:0005198;GO:0016600	7165.AGAP003789-PA	AGAP003789-PA	0.8739	COG2268	KOG2668	_	K07192	FLOT
comp179593_c0_seq2	271	66-881(+)	gi|24642031|ref|NP_511157.2|	Flotillin-2, isoform B [Drosophila Flotillin-2, isoform F [Drosophila melanogaster]	0.85	GO:0035011;GO:0007155;GO:0005198;GO:0016600	7070.XP_972075	similar to CG32593-PB, isoform B	0.8604	COG2268	KOG2668	_	K07192	FLOT
comp179646_c0_seq2	291	1-873(-)	gi|348563996|ref|XP_003467792.1|	PREDICTED: SAM domain and HD domain-containing protein 1-like [Cavia porcellus]	0.63	GO:0002376;GO:0006952;GO:0005488	_	_	_	_	_	_	None	_
comp179665_c0_seq1	330	210-1199(+)	gi|35210506|dbj|BAC87883.1|	casein kinase I alpha S [Carassius auratus]	0.94	GO:0000287;GO:0005847;GO:0005524;GO:0005737;GO:0007067;GO:0005730;GO:0000777;GO:0051219;GO:0000902;GO:0007507;GO:0009069;GO:0016607;GO:0005813;GO:0042277;GO:0004674;GO:0018105;GO:0051301;GO:0030529;GO:0001948;GO:0016055	69293.ENSGACP00000025888	casein kinase 1, alpha 1-like	0.9439	COG0515	KOG1163	_	K08957	CSNK1A
comp179682_c0_seq1	216	51-698(+)	gi|307191011|gb|EFN74765.1|	GTP-binding nuclear protein Ran [Camponotus floridanus]	0.97	GO:0006886;GO:0006913;GO:0006184;GO:0007264;GO:0005525;GO:0003924	7070.XP_966512	similar to CG1404-PA, isoform A	0.9808	COG1100	KOG0096	_	K07936	RAN
comp179682_c0_seq2	216	37-684(+)	gi|307191011|gb|EFN74765.1|	GTP-binding nuclear protein Ran [Camponotus floridanus]	0.97	GO:0006886;GO:0006913;GO:0006184;GO:0007264;GO:0005525;GO:0003924	7070.XP_966512	similar to CG1404-PA, isoform A	0.9808	COG1100	KOG0096	_	K07936	RAN
comp179690_c0_seq1	135	53-460(+)	gi|307190828|gb|EFN74680.1|	Serine/threonine-protein kinase 38-like [Camponotus floridanus]	0.83	GO:0007165;GO:0005524;GO:0009069;GO:0006468;GO:0004697	_	_	_	_	_	_	K08790	STK38, NDR
comp179726_c0_seq2	306	3-920(-)	gi|195352554|ref|XP_002042777.1|	GM17562 [Drosophila sechellia]	0.63	GO:0016059	_	_	_	_	_	_	K10270	FBXL4
comp179729_c0_seq1	176	1-528(-)	gi|259906648|gb|ACW84414.1|	estrogen receptor-like protein [Teleogryllus emma]	0.79	GO:0003707;GO:0006355;GO:0005667;GO:0008270;GO:0043565;GO:0043401;GO:0003700;GO:0045449	7070.NP_001135406	estrogen-related receptor	0.7921	_	KOG3575	_	K08703	NR3BN, ERR
comp179729_c0_seq10	266	1-798(-)	gi|151188219|gb|ABR88112.1|	estrogen-related receptor [Polyrhachis vicina]	0.73	GO:0003707;GO:0006355;GO:0005667;GO:0008270;GO:0043565;GO:0043401;GO:0003700;GO:0045449	7070.NP_001135406	estrogen-related receptor	0.7543	_	KOG3575	_	K08703	NR3BN, ERR
comp179729_c0_seq11	346	1-1038(-)	gi|151188219|gb|ABR88112.1|	estrogen-related receptor [Polyrhachis vicina]	0.74	GO:0003707;GO:0006355;GO:0005667;GO:0008270;GO:0043565;GO:0043401;GO:0003700;GO:0045449	7070.NP_001135406	estrogen-related receptor	0.7848	_	KOG3575	_	K08703	NR3BN, ERR
comp179729_c0_seq12	164	1-492(-)	gi|283825466|gb|ADB43256.1|	estrogen-related receptor [Scylla paramamosain]	0.7	GO:0003707;GO:0006355;GO:0005667;GO:0008270;GO:0043565;GO:0043401;GO:0003700;GO:0045449	_	_	_	_	_	_	K08703	NR3BN, ERR
comp179729_c0_seq13	327	1-981(-)	gi|151188219|gb|ABR88112.1|	estrogen-related receptor [Polyrhachis vicina]	0.74	GO:0003707;GO:0006355;GO:0005667;GO:0008270;GO:0043565;GO:0043401;GO:0003700;GO:0045449	7070.NP_001135406	estrogen-related receptor	0.7848	_	KOG3575	_	K08703	NR3BN, ERR
comp179729_c0_seq16	346	3-1040(-)	gi|478262859|gb|ENN81341.1|	hypothetical protein YQE_02252, partial [Dendroctonus ponderosae]	0.75	GO:0003707;GO:0006355;GO:0005667;GO:0008270;GO:0043565;GO:0043401;GO:0003700;GO:0045449	7070.NP_001135406	estrogen-related receptor	0.7645	_	KOG3575	_	K08703	NR3BN, ERR
comp179729_c0_seq17	325	1-975(-)	gi|151188219|gb|ABR88112.1|	estrogen-related receptor [Polyrhachis vicina]	0.74	GO:0003707;GO:0006355;GO:0005667;GO:0008270;GO:0043565;GO:0043401;GO:0003700;GO:0045449	7070.NP_001135406	estrogen-related receptor	0.7848	_	KOG3575	_	K08703	NR3BN, ERR
comp179729_c0_seq2	327	3-983(-)	gi|478262859|gb|ENN81341.1|	hypothetical protein YQE_02252, partial [Dendroctonus ponderosae]	0.75	GO:0003707;GO:0006355;GO:0005667;GO:0008270;GO:0043565;GO:0043401;GO:0003700;GO:0045449	7070.NP_001135406	estrogen-related receptor	0.7645	_	KOG3575	_	K08703	NR3BN, ERR
comp179729_c0_seq3	245	1-735(-)	gi|151188219|gb|ABR88112.1|	estrogen-related receptor [Polyrhachis vicina]	0.73	GO:0003707;GO:0006355;GO:0005667;GO:0008270;GO:0043565;GO:0043401;GO:0003700;GO:0045449	7070.NP_001135406	estrogen-related receptor	0.7543	_	KOG3575	_	K08703	NR3BN, ERR
comp179729_c0_seq5	348	3-1046(-)	gi|478262859|gb|ENN81341.1|	hypothetical protein YQE_02252, partial [Dendroctonus ponderosae]	0.75	GO:0003707;GO:0006355;GO:0005667;GO:0008270;GO:0043565;GO:0043401;GO:0003700;GO:0045449	7070.NP_001135406	estrogen-related receptor	0.7645	_	KOG3575	_	K08703	NR3BN, ERR
comp179729_c0_seq6	367	3-1103(-)	gi|478262859|gb|ENN81341.1|	hypothetical protein YQE_02252, partial [Dendroctonus ponderosae]	0.75	GO:0003707;GO:0006355;GO:0005667;GO:0008270;GO:0043565;GO:0043401;GO:0003700;GO:0045449	7070.NP_001135406	estrogen-related receptor	0.7645	_	KOG3575	_	K08703	NR3BN, ERR
comp179729_c0_seq7	264	1-792(-)	gi|151188219|gb|ABR88112.1|	estrogen-related receptor [Polyrhachis vicina]	0.73	GO:0003707;GO:0006355;GO:0005667;GO:0008270;GO:0043565;GO:0043401;GO:0003700;GO:0045449	7070.NP_001135406	estrogen-related receptor	0.7543	_	KOG3575	_	K08703	NR3BN, ERR
comp179729_c0_seq8	285	1-855(-)	gi|151188219|gb|ABR88112.1|	estrogen-related receptor [Polyrhachis vicina]	0.73	GO:0003707;GO:0006355;GO:0005667;GO:0008270;GO:0043565;GO:0043401;GO:0003700;GO:0045449	7070.NP_001135406	estrogen-related receptor	0.7543	_	KOG3575	_	K08703	NR3BN, ERR
comp179729_c0_seq9	306	1-918(-)	gi|151188219|gb|ABR88112.1|	estrogen-related receptor [Polyrhachis vicina]	0.74	GO:0003707;GO:0006355;GO:0005667;GO:0008270;GO:0043565;GO:0043401;GO:0003700;GO:0045449	7070.NP_001135406	estrogen-related receptor	0.7848	_	KOG3575	_	K08703	NR3BN, ERR
comp179806_c0_seq2	199	2-598(+)	gi|148229654|ref|NP_001084230.1|	DEAD (Asp-Glu-Ala-Asp) box helicase 5 [Xenopus laevis]	0.85	GO:0072332;GO:0030331;GO:0005524;GO:0000381;GO:0060765;GO:0008026;GO:0000122;GO:0050681;GO:0005730;GO:0005667;GO:0043517;GO:0007623;GO:0033148;GO:0045941;GO:0003724;GO:0001701;GO:0071013;GO:0036002;GO:0003713;GO:0045944	_	_	_	_	_	_	K12823	DDX5, DBP2
comp179818_c0_seq3	177	2-535(+)	gi|91094509|ref|XP_971775.1|	PREDICTED: similar to mob as tumor suppressor-like protein [Tribolium castaneum]	0.98	GO:0019209;GO:0005634;GO:0035329;GO:0016301;GO:0046777;GO:0046872;GO:0042327;GO:0005829;GO:0019900	7070.XP_971775	similar to Mps one binder kinase activator-like 1A (Mob1 homolog 1A)	0.9817	_	KOG0440	_	K06685	MOB1
comp179819_c0_seq1	279	190-1026(+)	gi|312377377|gb|EFR24217.1|	hypothetical protein AND_11339 [Anopheles darlingi]	0.81	GO:0035556	7159.AAEL007953-PA	conserved hypothetical protein	0.8063	_	KOG3953	_	K10345	SPSB3, SSB3
comp179819_c0_seq2	279	86-922(+)	gi|312377377|gb|EFR24217.1|	hypothetical protein AND_11339 [Anopheles darlingi]	0.81	GO:0035556	7159.AAEL007953-PA	conserved hypothetical protein	0.8063	_	KOG3953	_	K10345	SPSB3, SSB3
comp179844_c0_seq1	197	39-629(+)	gi|242267000|gb|ACS91344.1|	peroxiredoxin [Fenneropenaeus indicus]	0.88	GO:0006979;GO:0006804;GO:0004601;GO:0055114;GO:0051920	6945.ISCW010532-PA	alkyl hydroperoxide reductase, thiol specific antioxidant, putative	0.8495	COG0450	KOG0852	_	K13279	PRDX1
comp179852_c0_seq1	252	67-822(-)	gi|170032522|ref|XP_001844130.1|	phosphatidylinositol 3-kinase catalytic subunit type 3 [Culex quinquefasciatus]	0.93	GO:0005524;GO:0016303;GO:0036092;GO:0048015;GO:0046854	7159.AAEL009826-PA	phosphatidylinositol 3-kinase class	0.9414	COG5032	KOG0906	_	K00914	PIK3C3, VPS34
comp179891_c0_seq1	434	2-1306(+)	gi|347967818|ref|XP_312538.5|	AGAP002414-PA [Anopheles gambiae str. PEST]	0.63	GO:0007476;GO:0006911;GO:0005576;GO:0004181;GO:0048471;GO:0007616	_	_	_	_	_	_	K07752	CPD
comp179891_c0_seq4	290	3-875(+)	gi|347967818|ref|XP_312538.5|	AGAP002414-PA [Anopheles gambiae str. PEST]	0.68	GO:0007476;GO:0006911;GO:0005576;GO:0004181;GO:0048471;GO:0007616	_	_	_	_	_	_	K07752	CPD
comp179899_c0_seq1	436	464-1771(-)	gi|321459995|gb|EFX71042.1|	hypothetical protein DAPPUDRAFT_309236 [Daphnia pulex]	0.82	GO:0007165	7070.XP_972556	kurtz	0.8543	_	KOG3865	_	K04439	ARRB
comp179902_c0_seq1	420	3-1262(+)	gi|91091360|ref|XP_972551.1|	PREDICTED: similar to GA13327-PA [Tribolium castaneum]	0.96	GO:0004175;GO:0005634;GO:0005524;GO:0005737;GO:0005875;GO:0006511;GO:0006974;GO:0008540;GO:0016887	7070.XP_972551	similar to 26S protease regulatory subunit 8	0.9652	COG1222	KOG0728	_	K03066	PSMC5, RPT6
comp179910_c0_seq14	211	3-635(-)	gi|410930410|ref|XP_003978591.1|	PREDICTED: forkhead box protein O3-like [Takifugu rubripes]	0.85	GO:0008286;GO:0001547;GO:0009888;GO:0042127;GO:0003690;GO:0003705;GO:0042593;GO:0051960;GO:0019901;GO:0007389;GO:0043523;GO:0090090;GO:0001544;GO:0005667;GO:0005829;GO:0006917;GO:0043565;GO:0006974;GO:0001556;GO:0051090;GO:0001542;GO:0045944;GO:0045648;GO:0009790;GO:0008301;GO:0008134	31033.ENSTRUP00000011625	forkhead box O3	0.8608	COG5025	KOG2294	_	K09408	FOXO3
comp179910_c0_seq2	216	3-650(-)	gi|410930410|ref|XP_003978591.1|	PREDICTED: forkhead box protein O3-like [Takifugu rubripes]	0.85	GO:0008286;GO:0001547;GO:0009888;GO:0042127;GO:0003690;GO:0003705;GO:0042593;GO:0051960;GO:0019901;GO:0007389;GO:0043523;GO:0090090;GO:0001544;GO:0005667;GO:0005829;GO:0006917;GO:0043565;GO:0006974;GO:0001556;GO:0051090;GO:0001542;GO:0045944;GO:0045648;GO:0009790;GO:0008301;GO:0008134	31033.ENSTRUP00000011625	forkhead box O3	0.8608	COG5025	KOG2294	_	K09408	FOXO3
comp179944_c0_seq1	98	1-294(+)	gi|225708876|gb|ACO10284.1|	Ras suppressor protein 1 [Caligus rogercresseyi]	0.88	GO:0007265	_	_	_	_	_	_	None	_
comp179944_c0_seq2	224	1-672(+)	gi|290462949|gb|ADD24522.1|	Ras suppressor protein 1 [Lepeophtheirus salmonis]	0.85	GO:0034329;GO:0005829;GO:0007265	9544.ENSMMUP00000021140	Ras suppressor protein 1	0.7972	COG4886	KOG0617	_	None	_
comp179953_c0_seq1	215	81-725(+)	gi|225712698|gb|ACO12195.1|	Dual specificity protein phosphatase 3 [Lepeophtheirus salmonis]	0.75	GO:0044424;GO:0004721;GO:0009968;GO:0006470	_	_	_	_	_	_	K14165	K14165
comp179958_c0_seq1	81	237-479(-)	gi|87239722|emb|CAJ57640.1|	putative ubiquitin conjugating enzyme 2 [Oesophagostomum dentatum]	1	GO:0070936;GO:0010008;GO:0005524;GO:0048132;GO:0007067;GO:0000122;GO:0007179;GO:0005875;GO:0005515;GO:0005829;GO:0030718;GO:0061418;GO:0005886;GO:0045087;GO:0005654;GO:0006281;GO:0006513;GO:0045676;GO:0051276;GO:0070979;GO:0030509;GO:0007286;GO:0006915;GO:0004842;GO:0007140;GO:0031647;GO:0008054;GO:0032480;GO:0006367;GO:0016322	9544.ENSMMUP00000014680	ubiquitin-conjugating enzyme E2 D2-like	1	COG5078	KOG0417	_	K06689	UBE2D_E, UBC4, UBC5
comp179991_c0_seq3	126	226-603(+)	gi|499009125|ref|XP_004536488.1|	PREDICTED: protein toll-like [Ceratitis capitata]	0.7	GO:0016020;GO:0007165;GO:0006955;GO:0042742	_	_	_	_	_	_	None	_
comp179997_c0_seq1	230	552-1241(-)	gi|225714638|gb|ACO13165.1|	Ras-related protein Rab-2 [Lepeophtheirus salmonis]	0.94	GO:0007264;GO:0005525;GO:0015031;GO:0031982;GO:0003924	7070.XP_971919	similar to CG3269-PA	0.9437	COG1100	KOG0098	_	None	_
comp180050_c0_seq1	298	297-1193(+)	gi|195030450|ref|XP_001988081.1|	GH10972 [Drosophila grimshawi]	0.55	GO:0042060	_	_	_	_	_	_	None	_
comp180088_c0_seq1	212	71-706(+)	gi|225713422|gb|ACO12557.1|	Ras-related protein Rab-5C [Lepeophtheirus salmonis]	0.85	GO:0007264;GO:0005525;GO:0015031	7739.JGI118354	annotation not available	0.8357	COG1100	KOG0092	_	K07889	RAB5C
comp180088_c0_seq2	212	71-706(+)	gi|225713422|gb|ACO12557.1|	Ras-related protein Rab-5C [Lepeophtheirus salmonis]	0.85	GO:0007264;GO:0005525;GO:0015031	7739.JGI118354	annotation not available	0.8357	COG1100	KOG0092	_	K07889	RAB5C
comp180095_c0_seq1	196	3-593(+)	gi|321458292|gb|EFX69362.1|	hypothetical protein DAPPUDRAFT_300939 [Daphnia pulex]	0.78	GO:0000287;GO:0052657;GO:0032263;GO:0006166;GO:0043103;GO:0048666;GO:0005829;GO:0021953;GO:0006178;GO:0007610;GO:0046038;GO:0051289;GO:0032264;GO:0002060;GO:0005694;GO:0042803;GO:0004422;GO:0045964;GO:0030900;GO:0006168	9913.ENSBTAP00000053015	Hypoxanthine-guanine phosphoribosyltransferase (HGPRTase)(HGPRT)(EC 2.4.2.8)	0.763	COG0634	KOG3367	_	K00760	hprT, hpt, HPRT1
comp180095_c0_seq2	233	3-701(+)	gi|321458292|gb|EFX69362.1|	hypothetical protein DAPPUDRAFT_300939 [Daphnia pulex]	0.79	GO:0000287;GO:0052657;GO:0032263;GO:0006166;GO:0043103;GO:0048666;GO:0005829;GO:0021953;GO:0006178;GO:0007610;GO:0046038;GO:0051289;GO:0032264;GO:0002060;GO:0005694;GO:0042803;GO:0004422;GO:0045964;GO:0030900;GO:0006168	7955.ENSDARP00000003603	hypoxanthine phosphoribosyltransferase 1	0.7725	COG0634	KOG3367	_	K00760	hprT, hpt, HPRT1
comp180095_c0_seq3	233	2-700(+)	gi|321458292|gb|EFX69362.1|	hypothetical protein DAPPUDRAFT_300939 [Daphnia pulex]	0.8	GO:0000287;GO:0052657;GO:0032263;GO:0006166;GO:0043103;GO:0048666;GO:0005829;GO:0021953;GO:0006178;GO:0007610;GO:0046038;GO:0051289;GO:0032264;GO:0002060;GO:0005694;GO:0042803;GO:0004422;GO:0045964;GO:0030900;GO:0006168	7955.ENSDARP00000003603	hypoxanthine phosphoribosyltransferase 1	0.7725	COG0634	KOG3367	_	K00760	hprT, hpt, HPRT1
comp180188_c0_seq1	137	109-519(-)	gi|321456801|gb|EFX67901.1|	hypothetical protein DAPPUDRAFT_93647 [Daphnia pulex]	0.85	GO:0010038	7668.XP_001181724	similar to conserved hypothetical protein	0.8058	COG1324	KOG3338	_	K03926	cutA
comp180188_c0_seq2	160	109-588(-)	gi|321456801|gb|EFX67901.1|	hypothetical protein DAPPUDRAFT_93647 [Daphnia pulex]	0.85	GO:0010038	7668.XP_001181724	similar to conserved hypothetical protein	0.8058	COG1324	KOG3338	_	K03926	cutA
comp180193_c0_seq1	833	_	gi|156401378|ref|XP_001639268.1|	predicted protein [Nematostella predicted protein [Nematostella vectensis]	0.83	GO:0006979;GO:0006804;GO:0004601;GO:0055114;GO:0051920	45351.JGI234225	hypothetical protein	0.8273	COG0450	KOG0854	_	K11188	PRDX6
comp180211_c0_seq1	213	1-642(+)	gi|359372673|gb|AEV42205.1|	cytosolic heat shock protein 90kDa [Eurytemora affinis]	0.97	GO:0006457;GO:0005524;GO:0051082;GO:0006950	7425.XP_001601130	similar to mCG14932	0.9108	COG0326	KOG0019	_	K04079	htpG, HSP90A
comp180211_c0_seq2	120	1-363(+)	gi|359372673|gb|AEV42205.1|	cytosolic heat shock protein 90kDa [Eurytemora affinis]	0.95	GO:0006457;GO:0005524;GO:0051082;GO:0006950	_	_	_	_	_	_	K04079	htpG, HSP90A
comp180211_c0_seq3	398	1-1197(+)	gi|359372673|gb|AEV42205.1|	cytosolic heat shock protein 90kDa [Eurytemora affinis]	0.92	GO:0005524;GO:0007098;GO:0005705;GO:0008293;GO:0019094;GO:0007283;GO:0007465;GO:0007015;GO:0010529;GO:0009631;GO:0006457;GO:0005813;GO:0008360;GO:0009408;GO:0042623;GO:0045187;GO:0048471;GO:0005811;GO:0051082;GO:0007052	7237.FBpp0274520	Hsp83	0.8985	COG0326	KOG0019	_	K04079	htpG, HSP90A
comp180233_c0_seq2	149	2-448(+)	gi|432863585|ref|XP_004070139.1|	PREDICTED: DNA polymerase subunit gamma-1-like [Oryzias latipes]	0.78	GO:0002020;GO:0003677;GO:0042645;GO:0000785;GO:0006287;GO:0007568;GO:0005760;GO:0004527;GO:0003887;GO:0006264;GO:0003682;GO:0005743	_	_	_	_	_	_	K02332	POLG1
comp180255_c0_seq2	782	219-2564(-)	gi|341650460|gb|AEK86519.1|	IKKepsilon2 [Litopenaeus vannamei]	0.73	GO:0007252;GO:0005524;GO:0008384;GO:0009069;GO:0008385	7460.XP_396937	IkappaB kinase-like 2	0.9476	COG0515	KOG4250	_	K05410	TBK1
comp180282_c0_seq1	79	69-305(+)	gi|321453977|gb|EFX65169.1|	putative TGF-beta receptor type I saxophone protein [Daphnia pulex]	0.78	GO:0016020;GO:0005524;GO:0009069;GO:0006468;GO:0005024;GO:0007178	7260.FBpp0243203	GK14060	0.7821	_	KOG2052	_	K13595	ACVR1N
comp180418_c0_seq4	575	3-1727(+)	gi|501293596|dbj|BAN20624.1|	heat shock protein cognate 3 [Riptortus pedestris]	0.76	GO:0021549;GO:0005634;GO:0044432;GO:0034976;GO:0051336;GO:0043167;GO:0071310;GO:0016829;GO:0031401;GO:0005515;GO:0048523;GO:0043234;GO:0000166;GO:0033014;GO:0006984;GO:0042981	8364.ENSXETP00000036704	heat shock 70kDa protein 5 (glucose-regulated protein, 78kDa)	0.7556	COG0443	KOG0100	_	K09490	HSPA5, BIP
comp1804297_c0_seq1	143	2-433(+)	gi|328702403|ref|XP_001952092.2|	PREDICTED: myosin heavy chain, muscle isoform 1 [Acyrthosiphon pisum]	0.8	GO:0045179;GO:0005703;GO:0007443;GO:0008258;GO:0030018;GO:0070986;GO:0008307;GO:0007298;GO:0016203;GO:0051259;GO:0060361;GO:0005863;GO:0035072;GO:0000910;GO:0045200;GO:0007527;GO:0031036;GO:0005884;GO:0032154;GO:0007395;GO:0000146;GO:0007496;GO:0030898;GO:0030241;GO:0032027;GO:0007427;GO:0006941;GO:0046663;GO:0035159;GO:0016461;GO:0046664;GO:0045184;GO:0045214;GO:0031672;GO:0042803;GO:0035317;GO:…	_	_	_	_	_	_	K10352	MYH
comp180438_c0_seq13	164	117-608(-)	gi|470326055|ref|XP_004364608.1|	oxysterol binding protein [Capsaspora owczarzaki ATCC 30864]	0.54	GO:0007179;GO:0040014	_	_	_	_	_	_	None	_
comp180438_c0_seq4	170	117-626(-)	gi|470326055|ref|XP_004364608.1|	oxysterol binding protein [Capsaspora owczarzaki ATCC 30864]	0.54	GO:0007179;GO:0040014	_	_	_	_	_	_	None	_
comp180438_c0_seq7	164	117-608(-)	gi|470326055|ref|XP_004364608.1|	oxysterol binding protein [Capsaspora owczarzaki ATCC 30864]	0.54	GO:0007179;GO:0040014	_	_	_	_	_	_	None	_
comp1804987_c0_seq1	146	3-440(-)	gi|238863840|gb|ACR66214.1|	transcription factor GATA123 [Branchiostoma floridae]	0.42	GO:0003677;GO:0002009;GO:0000981;GO:0007283;GO:0009792;GO:0035162;GO:0048519;GO:0005634;GO:0018991;GO:0002573;GO:0030218;GO:0008340;GO:0040011;GO:0045944;GO:0010171;GO:0009957	_	_	_	_	_	_	K09182	GATA1_2_3
comp180500_c0_seq1	324	2-976(+)	gi|488526288|ref|XP_004454980.1|	PREDICTED: oxysterols receptor LXR-beta [Dasypus novemcinctus]	0.57	GO:0010875;GO:0045892;GO:0005634;GO:0010867;GO:0007165;GO:0032270;GO:0032369;GO:0010887;GO:0005737;GO:0048550;GO:0005515;GO:0045723;GO:0045944;GO:0051006	_	_	_	_	_	_	K08535	NR1H2, LXRB
comp180500_c0_seq2	535	2-1606(+)	gi|488526288|ref|XP_004454980.1|	PREDICTED: oxysterols receptor LXR-beta [Dasypus novemcinctus]	0.57	GO:0010875;GO:0045892;GO:0005634;GO:0010867;GO:0007165;GO:0032270;GO:0032369;GO:0010887;GO:0005737;GO:0048550;GO:0005515;GO:0045723;GO:0045944;GO:0051006	_	_	_	_	_	_	K08535	NR1H2, LXRB
comp180525_c0_seq1	743	_	gi|241102056|ref|XP_002409865.1|	ADP ribosylation factor 79F, putative [Ixodes scapularis]	0.92	GO:0007264;GO:0005622;GO:0005525	6945.ISCW000919-PA	ADP ribosylation factor 79F, putative	0.9222	COG1100	KOG0072	_	K07942	ARL1
comp180572_c0_seq1	334	224-1225(-)	gi|478258513|gb|ENN78588.1|	hypothetical protein YQE_04955, partial [Dendroctonus ponderosae]	0.85	GO:0045859;GO:0007165;GO:0008603;GO:0005952;GO:0004691	7070.XP_972604	similar to CG3263-PC, isoform C	0.8526	COG0664	KOG1113	_	K04739	PRKAR
comp180575_c1_seq1	511	3-1535(+)	gi|197102232|ref|NP_001124648.1|	notchless protein homolog 1 [Pongo abelii]	0.76	GO:0005634;GO:0007219;GO:0001826	10090.ENSMUSP00000099502	notchless homolog 1 (Drosophila) Gene	0.7835	COG2319	KOG0271	_	K14855	RSA4, NLE1
comp180589_c0_seq1	157	2-472(+)	gi|46948826|gb|AAT07312.1|	punt [Anopheles gambiae]	0.8	GO:0023014;GO:0005524;GO:0009069;GO:0004702;GO:0017002;GO:0006468;GO:0048179;GO:0032924	_	_	_	_	_	_	K13597	ACVR2N
comp180589_c0_seq2	385	58-1215(+)	gi|156550957|ref|XP_001603863.1|	PREDICTED: activin receptor type-2B-like [Nasonia vitripennis]	0.72	GO:0016310;GO:0009069;GO:0007178;GO:0004675	7425.XP_001603863	punt-like	0.8571	COG0515	_	_	K13597	ACVR2N
comp180589_c0_seq3	157	2-472(+)	gi|46948826|gb|AAT07312.1|	punt [Anopheles gambiae]	0.8	GO:0023014;GO:0005524;GO:0009069;GO:0004702;GO:0017002;GO:0006468;GO:0048179;GO:0032924	_	_	_	_	_	_	K13597	ACVR2N
comp180589_c0_seq4	208	1-624(+)	gi|242006390|ref|XP_002424034.1|	mitogen-activated protein kinase ERK-A, putative [Pediculus humanus corporis]	0.83	GO:0023014;GO:0005524;GO:0009069;GO:0005024;GO:0006468;GO:0048179;GO:0004697;GO:0032924;GO:0017002;GO:0004702	121224.XP_002424034	mitogen-activated protein kinase ERK-A, putative (EC:2.7.11.30)	0.8205	COG0515	KOG3653	_	K13597	ACVR2N
comp180589_c0_seq5	208	1-624(+)	gi|242006390|ref|XP_002424034.1|	mitogen-activated protein kinase ERK-A, putative [Pediculus humanus corporis]	0.83	GO:0023014;GO:0005524;GO:0009069;GO:0005024;GO:0006468;GO:0048179;GO:0004697;GO:0032924;GO:0017002;GO:0004702	121224.XP_002424034	mitogen-activated protein kinase ERK-A, putative (EC:2.7.11.30)	0.8205	COG0515	KOG3653	_	K13597	ACVR2N
comp180644_c0_seq1	591	2-1774(+)	gi|240978500|ref|XP_002402961.1|	retinoid X receptor, putative [Ixodes scapularis]	0.69	GO:0044763;GO:0003677;GO:0044707;GO:0006355;GO:0050896	_	_	_	_	_	_	K05547	NR1A1, THRA
comp180648_c2_seq1	230	119-808(-)	gi|225714250|gb|ACO12971.1|	26S protease regulatory subunit 7 [Lepeophtheirus salmonis]	0.99	GO:0005524;GO:0008233;GO:0006521;GO:0000932;GO:0051437;GO:0005730;GO:0005829;GO:0005739;GO:0000209;GO:0016887;GO:0000216;GO:0005654;GO:0022624;GO:0000084;GO:0051436;GO:0010467;GO:0002479;GO:0031145;GO:0006200;GO:0017025;GO:0016071;GO:0006977;GO:0019048;GO:0042981	8364.ENSXETP00000050044	26S protease regulatory subunit 7	1	COG1222	KOG0729	_	K03061	PSMC2, RPT1
comp180683_c0_seq1	198	1-594(+)	gi|225710848|gb|ACO11270.1|	Superoxide dismutase [Caligus rogercresseyi]	0.64	GO:0019430;GO:0004784;GO:0018991;GO:0042803;GO:0060378;GO:0007281;GO:0008340;GO:0040027;GO:0005829;GO:0005507;GO:0005739;GO:0001306;GO:0071688	_	_	_	_	_	_	K04565	E1.15.1.1C, sodC, SOD1
comp180724_c0_seq1	390	129-1298(-)	gi|156398094|ref|XP_001638024.1|	predicted protein [Nematostella FEN1_NEMVE RecName: Full=Flap endonuclease 1; Short=FEN-1; AltName: Full=Flap structure-specific e	0.83	GO:0000287;GO:0005654;GO:0003677;GO:0006284;GO:0006308;GO:0017108;GO:0008409;GO:0005730;GO:0090305;GO:0005739;GO:0043137	45351.JGI201054	hypothetical protein	0.8351	COG0258	KOG2519	_	K04799	FEN1, RAD2
comp180729_c0_seq2	487	189-1649(-)	gi|472345994|ref|XP_004392730.1|	PREDICTED: probable ATP-dependent RNA helicase DDX60 [Odobenus rosmarus divergens]	0.64	GO:1900245;GO:0005515;GO:1900246;GO:0005737;GO:0003725;GO:0003690;GO:0003727	_	_	_	_	_	_	None	_
comp180729_c0_seq6	457	189-1559(-)	gi|472345994|ref|XP_004392730.1|	PREDICTED: probable ATP-dependent RNA helicase DDX60 [Odobenus rosmarus divergens]	0.64	GO:1900245;GO:0005515;GO:1900246;GO:0005737;GO:0003725;GO:0003690;GO:0003727	_	_	_	_	_	_	None	_
comp180734_c0_seq1	134	8-412(+)	gi|321456896|gb|EFX67993.1|	hypothetical protein DAPPUDRAFT_189492 [Daphnia pulex]	0.93	GO:0016020;GO:0035556	7159.AAEL007332-PA	cornichon protein, putative	0.9104	_	KOG2729	_	None	_
comp180734_c0_seq2	135	8-415(+)	gi|321456896|gb|EFX67993.1|	hypothetical protein DAPPUDRAFT_189492 [Daphnia pulex]	0.93	GO:0016020;GO:0035556	7159.AAEL007332-PA	cornichon protein, putative	0.9111	_	KOG2729	_	None	_
comp180773_c0_seq1	222	1-666(-)	gi|319738739|gb|ADV59560.1|	heat shock protein 70 [Paracyclopina nana]	0.94	GO:0032440;GO:0005524;GO:0007141;GO:0051861;GO:0031662;GO:0007286;GO:0055114;GO:0009408;GO:0070194;GO:0009986;GO:0001673;GO:0005515;GO:0005739;GO:0000795;GO:0036128	_	_	_	_	_	_	K03283	HSPA1_8
comp180773_c0_seq2	177	1-531(-)	gi|319738739|gb|ADV59560.1|	heat shock protein 70 [Paracyclopina nana]	0.94	GO:0032440;GO:0005524;GO:0007141;GO:0051861;GO:0006950;GO:0031662;GO:0007286;GO:0055114;GO:0070194;GO:0009986;GO:0001673;GO:0005739;GO:0000795;GO:0036128	_	_	_	_	_	_	K03283	HSPA1_8
comp180773_c0_seq3	117	1-351(-)	gi|319738739|gb|ADV59560.1|	heat shock protein 70 [Paracyclopina nana]	0.94	GO:0005524;GO:0006950	_	_	_	_	_	_	K03283	HSPA1_8
comp180773_c0_seq4	195	1-585(-)	gi|162424329|gb|ABX89903.1|	inducible heat shock protein 70 [Tigriopus japonicus]	0.93	GO:0005524;GO:0006950	_	_	_	_	_	_	K03283	HSPA1_8
comp180789_c0_seq1	152	3-458(+)	gi|328776977|ref|XP_625128.3|	PREDICTED: x-ray repair cross-complementing protein 5-like [Apis mellifera]	0.75	GO:0043564;GO:0004003;GO:0042162;GO:0003684;GO:0006310;GO:0006303;GO:0000723;GO:0005657	121224.XP_002423561	hypothetical protein	0.8211	_	_	NOG230305	K10885	XRCC5, KU80, G22P2
comp180789_c0_seq2	152	3-458(+)	gi|328776977|ref|XP_625128.3|	PREDICTED: x-ray repair cross-complementing protein 5-like [Apis mellifera]	0.75	GO:0043564;GO:0004003;GO:0042162;GO:0003684;GO:0006310;GO:0006303;GO:0000723;GO:0005657	121224.XP_002423561	hypothetical protein	0.8211	_	_	NOG230305	K10885	XRCC5, KU80, G22P2
comp180789_c0_seq3	152	3-458(+)	gi|328776977|ref|XP_625128.3|	PREDICTED: x-ray repair cross-complementing protein 5-like [Apis mellifera]	0.75	GO:0043564;GO:0004003;GO:0042162;GO:0003684;GO:0006310;GO:0006303;GO:0000723;GO:0005657	121224.XP_002423561	hypothetical protein	0.8211	_	_	NOG230305	K10885	XRCC5, KU80, G22P2
comp180789_c0_seq4	152	3-458(+)	gi|328776977|ref|XP_625128.3|	PREDICTED: x-ray repair cross-complementing protein 5-like [Apis mellifera]	0.75	GO:0043564;GO:0004003;GO:0042162;GO:0003684;GO:0006310;GO:0006303;GO:0000723;GO:0005657	121224.XP_002423561	hypothetical protein	0.8211	_	_	NOG230305	K10885	XRCC5, KU80, G22P2
comp180789_c0_seq5	152	3-458(+)	gi|328776977|ref|XP_625128.3|	PREDICTED: x-ray repair cross-complementing protein 5-like [Apis mellifera]	0.75	GO:0043564;GO:0004003;GO:0042162;GO:0003684;GO:0006310;GO:0006303;GO:0000723;GO:0005657	121224.XP_002423561	hypothetical protein	0.8211	_	_	NOG230305	K10885	XRCC5, KU80, G22P2
comp180801_c1_seq2	514	174-1715(+)	gi|225713124|gb|ACO12408.1|	Innexin inx2 [Lepeophtheirus salmonis]	0.75	GO:0016327;GO:0005921;GO:0016324;GO:0005243;GO:0007267;GO:0030727;GO:0007440;GO:0016331;GO:0042048;GO:0010496	_	_	_	_	_	_	None	_
comp180801_c1_seq3	512	174-1709(+)	gi|225713124|gb|ACO12408.1|	Innexin inx2 [Lepeophtheirus salmonis]	0.75	GO:0016327;GO:0005921;GO:0016324;GO:0005243;GO:0007267;GO:0030727;GO:0007440;GO:0016331;GO:0042048;GO:0010496	_	_	_	_	_	_	None	_
comp180845_c0_seq3	105	173-490(+)	gi|403223777|dbj|BAM41907.1|	Rab GTPase [Theileria orientalis strain Shintoku]	0.82	GO:0007264;GO:0005525;GO:0015031	644223.PAS_chr3_0143	Secretory vesicle-associated Rab GTPase essential for exocytosis	0.7634	COG1100	KOG0078	_	K07901	RAB8A, MEL
comp180863_c0_seq1	150	51-500(-)	gi|225719530|gb|ACO15611.1|	Calmodulin [Caligus clemensi]	0.8	GO:0048011;GO:0043274;GO:0072542;GO:0030801;GO:0002576;GO:0051343;GO:0046209;GO:0007173;GO:0008543;GO:0031996;GO:0032465;GO:0005513;GO:0006006;GO:0005980;GO:1901844;GO:0005654;GO:0007202;GO:0060315;GO:0000922;GO:0035307;GO:0030168;GO:0005829;GO:0005576;GO:0060316;GO:0034704;GO:0010881;GO:0005886;GO:0005876;GO:0007186;GO:0031997;GO:0005813;GO:0032516;GO:0030017;GO:0002027;GO:0044325;GO:0019904;GO:…	_	_	_	_	_	_	K02183	CALM
comp180899_c0_seq1	247	2-742(+)	gi|357616353|gb|EHJ70149.1|	putative peroxidasin [Danaus plexippus]	0.61	GO:0006979;GO:0006804;GO:0004601	_	_	_	_	_	_	None	_
comp180899_c0_seq2	290	1-873(+)	gi|242022412|ref|XP_002431634.1|	Thyroid peroxidase precursor, putative [Pediculus humanus corporis]	0.72	GO:0006979;GO:0006804;GO:0004601	_	_	_	_	_	_	None	_
comp180899_c0_seq3	185	2-559(+)	gi|66499817|ref|XP_396476.2|	PREDICTED: peroxidasin [Apis mellifera]	0.62	GO:0006979;GO:0006804;GO:0004601	_	_	_	_	_	_	None	_
comp180899_c0_seq4	535	1-1608(+)	gi|242022412|ref|XP_002431634.1|	Thyroid peroxidase precursor, putative [Pediculus humanus corporis]	0.74	GO:0006979;GO:0006804;GO:0004601	_	_	_	_	_	_	None	_
comp180900_c0_seq1	318	1-954(-)	gi|348515387|ref|XP_003445221.1|	PREDICTED: 78 kDa glucose-regulated protein-like [Oreochromis niloticus]	0.89	GO:0043154;GO:0005788;GO:0005524;GO:0043027;GO:0051603;GO:0031625;GO:0042149;GO:0030496;GO:0051787;GO:0034663;GO:0008180;GO:0030512;GO:0006987;GO:0005576;GO:0043022;GO:0021680;GO:0031398;GO:0005793;GO:0043066;GO:0048471;GO:0009986;GO:0019904;GO:0021589;GO:0030176;GO:0006983	8364.ENSXETP00000036704	heat shock 70kDa protein 5 (glucose-regulated protein, 78kDa)	0.8833	COG0443	KOG0100	_	K09490	HSPA5, BIP
comp180900_c0_seq2	413	1-1239(-)	gi|348515387|ref|XP_003445221.1|	PREDICTED: 78 kDa glucose-regulated protein-like [Oreochromis niloticus]	0.88	GO:0043154;GO:0005788;GO:0005524;GO:0043027;GO:0051603;GO:0031625;GO:0042149;GO:0030496;GO:0051787;GO:0034663;GO:0008180;GO:0030512;GO:0006987;GO:0005576;GO:0043022;GO:0021680;GO:0031398;GO:0005793;GO:0043066;GO:0048471;GO:0009986;GO:0019904;GO:0021589;GO:0030176;GO:0006983	8364.ENSXETP00000036704	heat shock 70kDa protein 5 (glucose-regulated protein, 78kDa)	0.8811	COG0443	KOG0100	_	K09490	HSPA5, BIP
comp180903_c0_seq2	230	1-690(+)	gi|170032157|ref|XP_001843949.1|	RNA recognition motif protein split ends [Culex quinquefasciatus]	0.69	GO:0003729;GO:0000398;GO:0048749;GO:0035222;GO:0030177;GO:0022008;GO:0000166;GO:0071011	7159.AAEL012171-PA	RNA recognition motif protein split ends	0.7978	_	KOG0112	_	K13190	RBM15
comp180927_c0_seq1	210	198-827(+)	gi|240974176|ref|XP_002401800.1|	zinc finger protein, putative [Ixodes scapularis]	0.94	GO:0007264;GO:0004767;GO:0005525;GO:0015031;GO:0006687	6945.ISCW015757-PA	zinc finger protein, putative	0.9767	COG1100	KOG0079	_	K07876	RAB35, RAB1C
comp180927_c0_seq2	211	2-634(+)	gi|240974176|ref|XP_002401800.1|	zinc finger protein, putative [Ixodes scapularis]	0.94	GO:0007264;GO:0004767;GO:0005525;GO:0015031;GO:0006687	6945.ISCW015757-PA	zinc finger protein, putative	0.9767	COG1100	KOG0079	_	K07876	RAB35, RAB1C
comp180980_c0_seq1	464	158-1549(-)	gi|157110270|ref|XP_001651031.1|	mothers against dpp protein [Aedes aegypti]	0.85	GO:0001649;GO:0048513;GO:0006355;GO:0005488;GO:0044767;GO:0007179;GO:0048522;GO:0005667;GO:0045449;GO:0001501;GO:0003700	7159.AAEL005513-PA	mothers against dpp protein	0.8624	_	KOG3701	_	K04676	SMAD1_5_8
comp180982_c0_seq1	454	589-1950(+)	gi|474422260|dbj|BAN10241.1|	suppressor of Cytokine signaling 2, partial [Gryllus bimaculatus]	0.75	GO:0007165;GO:0009725	_	_	_	_	_	_	K04695	SOCS2, CIS2
comp181027_c0_seq1	197	145-735(-)	gi|321479026|gb|EFX89982.1|	hypothetical protein DAPPUDRAFT_309672 [Daphnia pulex]	0.92	GO:0030141;GO:0007218	_	_	_	_	_	_	None	_
comp181048_c0_seq1	271	2-817(+)	gi|4838561|gb|AAD31042.1|AF144646_1	heat shock protein 70 [Crassostrea gigas]	0.99	GO:0005524;GO:0006950	_	_	_	_	_	_	K03283	HSPA1_8
comp181054_c0_seq1	390	2-1171(+)	gi|501292082|dbj|BAN20448.1|	extracellular regulated MAP kinase [Riptortus pedestris]	0.92	GO:0000165;GO:0005524;GO:0009069;GO:0006468;GO:0007178;GO:0004707	7070.XP_966833	similar to extracellular signal-regulated kinase	0.9184	COG0515	KOG0660	_	K04371	ERK1_2
comp181080_c0_seq1	218	2-655(-)	gi|307183985|gb|EFN70556.1|	Adenylosuccinate synthetase [Camponotus floridanus]	0.78	GO:0006531;GO:0006522;GO:0006167;GO:1901698;GO:0042301;GO:0046872;GO:0002376;GO:0005829;GO:0006144;GO:0005525;GO:0005886;GO:0004019	_	_	_	_	_	_	K01939	E6.3.4.4, purA
comp181085_c0_seq1	548	1-1644(+)	gi|443731102|gb|ELU16340.1|	hypothetical protein CAPTEDRAFT_101979 [Capitella teleta]	0.72	GO:0005654;GO:0048232;GO:0097362;GO:0006271;GO:0007292;GO:0000084;GO:0000075;GO:0000166;GO:0000082;GO:0017111;GO:0000724;GO:0000216	10090.ENSMUSP00000028831	minichromosome maintenance deficient 8 (S. cerevisiae) Gene; May have a role in the control [...]	0.7555	COG1241	KOG0480	_	K10737	MCM8
comp181085_c0_seq2	548	1-1644(+)	gi|443731102|gb|ELU16340.1|	hypothetical protein CAPTEDRAFT_101979 [Capitella teleta]	0.72	GO:0005654;GO:0048232;GO:0097362;GO:0006271;GO:0007292;GO:0000084;GO:0000075;GO:0000166;GO:0000082;GO:0017111;GO:0000724;GO:0000216	10090.ENSMUSP00000028831	minichromosome maintenance deficient 8 (S. cerevisiae) Gene; May have a role in the control [...]	0.7555	COG1241	KOG0480	_	K10737	MCM8
comp181138_c0_seq3	103	2-310(+)	gi|225717762|gb|ACO14727.1|	LITAF homolog [Caligus clemensi]	0.64	GO:0044699;GO:0050896	_	_	_	_	_	_	None	_
comp181140_c0_seq1	478	2-1438(+)	gi|345321599|ref|XP_001521468.2|	PREDICTED: thrombospondin-1 [Ornithorhynchus anatinus]	0.61	GO:0031012;GO:0009611;GO:0030335;GO:0042221;GO:0035556;GO:0051246;GO:0031325;GO:0005515;GO:0002376;GO:0048514;GO:0048523;GO:0048584;GO:0009966;GO:0051239;GO:0010594	_	_	_	_	_	_	K04659	THBS
comp181167_c0_seq3	243	103-831(-)	gi|6647294|gb|AAF21133.1|L81170_1	CYP2J4 [Rattus norvegicus]	0.65	GO:0043231;GO:0003958;GO:0014070;GO:0001523;GO:0019369;GO:0006118;GO:0005488;GO:0008392	_	_	_	_	_	_	K07418	CYP2J
comp181192_c0_seq1	336	198-1205(-)	gi|225713672|gb|ACO12682.1|	Cell differentiation protein RCD1 homolog [Lepeophtheirus salmonis]	0.85	GO:2000327;GO:0005634;GO:0006355;GO:0000932;GO:0007548;GO:0030014;GO:0005515;GO:0005829;GO:0000289;GO:0019221;GO:0033147	7739.JGI284472	hypothetical protein	0.9434	COG5209	KOG3036	_	K12606	RCD1, CNOT9, CAF40
comp181192_c0_seq2	336	182-1189(-)	gi|225713672|gb|ACO12682.1|	Cell differentiation protein RCD1 homolog [Lepeophtheirus salmonis]	0.85	GO:2000327;GO:0005634;GO:0006355;GO:0000932;GO:0007548;GO:0030014;GO:0005515;GO:0005829;GO:0000289;GO:0019221;GO:0033147	7739.JGI284472	hypothetical protein	0.9434	COG5209	KOG3036	_	K12606	RCD1, CNOT9, CAF40
comp181193_c0_seq1	533	2-1600(+)	gi|21355323|ref|NP_648588.1|	nesthocker [Drosophila melanogaster]	0.71	GO:0001707;GO:0045743;GO:0005829;GO:0006048;GO:0004610;GO:0060438	_	_	_	_	_	_	K01836	E5.4.2.3
comp181196_c0_seq1	228	83-769(+)	gi|148222278|ref|NP_001081266.1|	G2/mitotic-specific cyclin-B1 [Xenopus laevis]	0.77	GO:0005856;GO:0005113;GO:0007165;GO:0051726	_	_	_	_	_	_	K05868	CCNB
comp181197_c0_seq1	452	36-1391(+)	gi|225709884|gb|ACO10788.1|	Histone deacetylase 1 [Caligus rogercresseyi]	0.9	GO:0032041;GO:0060766;GO:0046969;GO:0043922;GO:0033613;GO:0001047;GO:0008285;GO:0042826;GO:0097372;GO:0016580;GO:0070933;GO:0048709;GO:0046970;GO:0021754;GO:0001106;GO:0016581;GO:0001764;GO:0045944;GO:0016055;GO:0021903;GO:0010870;GO:0005829;GO:0030318;GO:0060028;GO:0001889;GO:0060218;GO:0048565;GO:0048263;GO:0050769;GO:0070932;GO:0008284;GO:0031017	7739.JGI110155	annotation not available	0.9177	COG0123	KOG1342;KOG1343	_	K06067	HDAC1_2
comp181199_c0_seq1	174	29-550(-)	gi|291230674|ref|XP_002735290.1|	PREDICTED: DNA-directed RNA polymerase III subunit RPC4-like [Saccoglossus kowalevskii]	0.71	GO:0005634;GO:0002376;GO:0000785;GO:0003682;GO:0006952	_	_	_	_	_	_	K03026	RPC53, POLR3D
comp181249_c0_seq1	168	1-504(+)	gi|498945920|ref|XP_004522289.1|	PREDICTED: superoxide dismutase [Cu-Zn]	0.81	GO:0006879;GO:0008217;GO:0005615;GO:0031410;GO:0001819;GO:0060087;GO:0002262;GO:0043025;GO:0007566;GO:0045471;GO:0006302;GO:0005507;GO:0008090;GO:0005955;GO:0006309;GO:0019430;GO:0042493;GO:0032839;GO:0043524;GO:0009408;GO:0001541;GO:0006749;GO:0030346;GO:0060047;GO:0008089;GO:0060052;GO:0004784;GO:0060088;GO:0040014;GO:0051087;GO:0055114;GO:0007283;GO:0032287;GO:0005829;GO:0008270;GO:0005739;GO:…	9031.ENSGALP00000035996	Superoxide dismutase [Cu-Zn] (EC 1.15.1.1); Destroys radicals which are normally produced wi [...]	0.8108	COG2032	KOG0441	_	K04565	E1.15.1.1C, sodC, SOD1
comp181285_c0_seq1	338	452-1465(-)	gi|307193580|gb|EFN76318.1|	Protein mothers against dpp [Harpegnathos saltator]	0.81	GO:0007179;GO:0005667;GO:0006355;GO:0045449;GO:0003700	7460.XP_392819	mothers against dpp	0.8218	_	KOG3701	_	K04676	SMAD1_5_8
comp181345_c0_seq1	191	2-574(-)	gi|347966016|ref|XP_001238517.2|	AGAP001488-PA [Anopheles gambiae str. PEST]	0.69	GO:0016327;GO:0005921;GO:0016324;GO:0005243;GO:0007267;GO:0030727;GO:0007440;GO:0016331;GO:0042048;GO:0010496	_	_	_	_	_	_	None	_
comp181345_c0_seq2	81	1-243(-)	gi|498938940|ref|XP_004521056.1|	PREDICTED: innexin inx2-like [Ceratitis capitata]	0.82	GO:0016327;GO:0005921;GO:0016324;GO:0005243;GO:0007267;GO:0030727;GO:0007440;GO:0016331;GO:0042048;GO:0010496	_	_	_	_	_	_	None	_
comp181345_c0_seq3	266	2-799(-)	gi|112984532|ref|NP_001037203.1|	innexin 2 [Bombyx mori]	0.73	GO:0016327;GO:0005921;GO:0016324;GO:0005243;GO:0007267;GO:0030727;GO:0007440;GO:0016331;GO:0042048;GO:0010496	_	_	_	_	_	_	None	_
comp181373_c0_seq3	94	2-283(+)	gi|221102195|ref|XP_002158556.1|	PREDICTED: uracil phosphoribosyltransferase-like [Hydra magnipapillata]	0.76	GO:0009116;GO:0004845;GO:0035690;GO:0008655;GO:0006206;GO:0017144	_	_	_	_	_	_	K00761	upp, UPRT
comp181398_c0_seq1	201	638-1240(-)	gi|195134256|ref|XP_002011553.1|	GI11034 [Drosophila mojavensis]	0.93	GO:0007264;GO:0005525;GO:0015031	7260.FBpp0254192	GK25049	0.927	COG1100	KOG0078	_	K07976	RAB
comp181399_c0_seq1	190	167-736(-)	gi|401879814|gb|AFQ30997.1|	GTP-binding protein Rheb [Nilaparvata lugens]	0.82	GO:0016020;GO:0006184;GO:0004767;GO:0007264;GO:0005525;GO:0006687;GO:0003924	7425.XP_001599091	PREDICTED: similar to RAS, putative [Nasonia vitripennis].	0.8268	COG1100	KOG0395	NOG269975	K07208	RHEB
comp181406_c0_seq3	151	30-485(+)	gi|321465982|gb|EFX76980.1|	hypothetical protein DAPPUDRAFT_306029 [Daphnia pulex]	0.79	GO:0006769;GO:0042102;GO:0001882;GO:0004731;GO:0042301;GO:0008144;GO:0005829;GO:0034418;GO:0006144;GO:0006206;GO:0042493;GO:0034356;GO:0002060;GO:0070970;GO:0006195;GO:0046638;GO:0006148;GO:0046497;GO:0006955;GO:0043101;GO:0006738	_	_	_	_	_	_	K03783	punA
comp181423_c0_seq1	429	2-1288(+)	gi|225719554|gb|ACO15623.1|	General transcription factor IIH subunit 2 [Caligus clemensi]	0.72	GO:0006281;GO:0005622	7425.XP_001599241	similar to btf	0.7546	_	KOG2807	_	K03142	TFIIH2, GTF2H2, SSL1
comp181457_c0_seq1	475	3-1430(+)	gi|260787102|ref|XP_002588594.1|	hypothetical protein BRAFLDRAFT_131757 [Branchiostoma floridae]	0.62	GO:0030331;GO:0045941;GO:0007165;GO:0007059;GO:0006281;GO:0045893;GO:0016226;GO:0003713;GO:0005667;GO:0071817;GO:0097361	_	_	_	_	_	_	K15075	MET18, MMS19
comp181457_c0_seq3	956	_	gi|260787102|ref|XP_002588594.1|	hypothetical protein BRAFLDRAFT_131757 [Branchiostoma floridae]	0.68	GO:0006355;GO:0005819;GO:0006974;GO:0005737;GO:0006259	_	_	_	_	_	_	K15075	MET18, MMS19
comp181457_c0_seq5	992	_	gi|260787102|ref|XP_002588594.1|	hypothetical protein BRAFLDRAFT_131757 [Branchiostoma floridae]	0.67	GO:0006355;GO:0005819;GO:0006974;GO:0005737;GO:0006259	_	_	_	_	_	_	K15075	MET18, MMS19
comp181475_c0_seq1	198	182-775(+)	gi|333449487|gb|AEF33429.1|	Ras-like GTP-binding protein RHO [Crassostrea ariakensis]	0.87	GO:0016020;GO:0007264;GO:0005622;GO:0005525	7425.XP_001607487	PREDICTED: similar to putative Rho1 isoform 1 [Nasonia vitripennis].	0.8639	COG1100	KOG0393	_	K04513	RHOA
comp181478_c0_seq2	67	2-202(+)	gi|241851131|ref|XP_002415751.1|	type 3 inositol 1,4,5-trisphosphate receptor, putative [Ixodes scapularis]	0.77	GO:0005220;GO:0070588;GO:0005783;GO:0048016;GO:0016021	_	_	_	_	_	_	K02522	ITPRN
comp181488_c0_seq1	324	116-1087(-)	gi|321476925|gb|EFX87884.1|	hypothetical protein DAPPUDRAFT_95942 [Daphnia pulex]	0.75	GO:0016799;GO:0006281	45351.JGI219712	hypothetical protein; Excises uracil residues from the DNA which can arise as a result of mi [...]	0.7738	COG0692	KOG2994	_	K03648	UNG, UDG
comp181514_c0_seq1	525	3-1577(+)	gi|221124624|ref|XP_002154395.1|	PREDICTED: solute carrier family 40 member 1-like [Hydra magnipapillata]	0.53	GO:0043362;GO:0006826;GO:0035162;GO:0042541;GO:0010039;GO:0046688;GO:0005381	_	_	_	_	_	_	K14685	SLC40A1, FPN1
comp181514_c0_seq3	518	3-1556(+)	gi|221124624|ref|XP_002154395.1|	PREDICTED: solute carrier family 40 member 1-like [Hydra magnipapillata]	0.53	GO:0043362;GO:0006826;GO:0035162;GO:0042541;GO:0010039;GO:0046688;GO:0005381	_	_	_	_	_	_	K14685	SLC40A1, FPN1
comp181602_c0_seq1	360	795-1874(-)	gi|193636669|ref|XP_001945117.1|	PREDICTED: guanine nucleotide-binding protein G(i) subunit alpha-like [Acyrthosiphon pisum]	0.89	GO:0031683;GO:0006184;GO:0005525;GO:0004871;GO:0007188;GO:0003924	7070.XP_001812899	similar to sec-23 interacting protein P125	0.9127	_	KOG0082	_	K04630	GNAI
comp181602_c0_seq2	366	795-1892(-)	gi|321475390|gb|EFX86353.1|	guanine nucleotide-binding protein G(i) alpha-1 subunit [Daphnia pulex]	0.87	GO:0007193;GO:0031821;GO:0005634;GO:0006184;GO:0005834;GO:0005813;GO:0005737;GO:0003924;GO:0030496;GO:0031683;GO:0046872;GO:0051301;GO:0004871;GO:0005525;GO:0007049	69293.ENSGACP00000013922	guanine nucleotide binding protein (G protein), alpha inhibiting activity polypeptide 2	0.8676	_	KOG0082	_	K04630	GNAI
comp181602_c0_seq3	355	932-1996(-)	gi|321461127|gb|EFX72162.1|	guanine nucleotide-binding protein G(o) subunit alpha 1 [Daphnia pulex]	0.97	GO:0031683;GO:0046872;GO:0006184;GO:0005525;GO:0004871;GO:0007188;GO:0003924	7070.XP_975838	similar to Guanine nucleotide-binding protein G(o) subunit alpha	0.9548	_	KOG0082	_	K04534	GNAO, G-ALPHA-O
comp181638_c2_seq1	212	2-640(+)	gi|225713516|gb|ACO12604.1|	Eukaryotic translation initiation factor 6 [Lepeophtheirus salmonis]	0.94	GO:0005840;GO:0043022;GO:0006446;GO:0003743;GO:0005730;GO:0007229;GO:0043023;GO:0042256;GO:0042273	7739.JGI127243	hypothetical protein	0.935	COG1976	KOG3185	_	K03264	EIF6
comp18166_c0_seq1	272	2-817(-)	gi|443709468|gb|ELU04140.1|	hypothetical protein CAPTEDRAFT_219588 [Capitella teleta]	0.49	GO:0060173;GO:0048839;GO:0007166;GO:0007411	_	_	_	_	_	_	K08462	GPR125
comp181685_c0_seq1	589	331-2097(+)	gi|242021051|ref|XP_002430960.1|	conserved hypothetical protein [Pediculus humanus corporis]	0.85	GO:0003677;GO:0007165;GO:0006355;GO:0005737;GO:0046983;GO:0005667;GO:0004871;GO:0045449;GO:0003700	7070.XP_970422	PREDICTED: similar to arylhydrocarbon receptor nuclear translocator homolog b [Tribolium cas [...]	0.8088	_	KOG3561	_	K09097	ARNT
comp181705_c0_seq1	173	62-580(+)	gi|321461059|gb|EFX72094.1|	hypothetical protein DAPPUDRAFT_308561 [Daphnia pulex]	0.97	GO:0005665;GO:0003723;GO:0000398;GO:0006370;GO:0050434;GO:0006468;GO:0006283;GO:0006915;GO:0006368;GO:0003899;GO:0005730;GO:0004672;GO:0006144;GO:0006206;GO:0006367	7739.JGI124918	annotation not available	0.9706	COG1095	KOG3298	_	K03015	RPB7, POLR2G
comp181722_c0_seq1	217	1-651(-)	gi|334333140|ref|XP_001377703.2|	PREDICTED: serine/threonine-protein kinase PLK1-like [Monodelphis domestica]	0.87	GO:0045298;GO:0005524;GO:0051233;GO:0090007;GO:0005737;GO:0019901;GO:0030496;GO:0051297;GO:0000122;GO:0007092;GO:0031648;GO:0031572;GO:0005876;GO:0043393;GO:0071168;GO:0000942;GO:0009069;GO:0005813;GO:0000910;GO:0043066;GO:0045736;GO:0008017;GO:0010800;GO:0010997;GO:0018105;GO:0004674;GO:0000086;GO:0001578	13616.ENSMODP00000008293	annotation not avaliable	0.8812	COG0515	_	_	K06631	PLK1
comp181745_c1_seq29	702	_	gi|241148960|ref|XP_002405949.1|	ATP-dependent RNA helicase, putative [Ixodes scapularis]	0.94	GO:0006396;GO:0003723;GO:0030331;GO:0005524;GO:0008186;GO:0008026;GO:0072358;GO:0009791;GO:0005730;GO:0005667;GO:2001014;GO:0033148;GO:0045941;GO:0003724;GO:0003713;GO:0045944	_	_	_	_	_	_	K13178	DDX17
comp181771_c1_seq1	541	_	gi|225718416|gb|ACO15054.1|	Calmodulin [Caligus clemensi]	0.83	GO:0044707;GO:0050789;GO:0005509;GO:0050896;GO:0005737	3218.JGI210000	hypothetical protein	0.7941	COG5126	KOG0027	_	K02183	CALM
comp181778_c0_seq1	343	2-1030(+)	gi|225718702|gb|ACO15197.1|	Arsenical pump-driving ATPase [Caligus clemensi]	0.86	GO:0005783;GO:0005524;GO:0006812;GO:0071722;GO:0046872;GO:0015446;GO:0006200;GO:0015700	7176.CPIJ005690-PA	arsenical pump-driving ATPase; ATPase required for the post-translational delivery of tail-a [...]	0.8704	COG0003	KOG2825	_	K01551	E3.6.3.16, arsA
comp181782_c0_seq3	338	62-1075(+)	gi|483518370|gb|EOB04573.1|	Collagen alpha-5(IV) chain, partial [Anas platyrhynchos]	0.6	GO:0005788;GO:0005587;GO:0032836;GO:0016525;GO:0007166;GO:0007411	_	_	_	_	_	_	K06237	COL4A
comp181785_c0_seq1	352	123-1178(-)	gi|290562231|gb|ADD38512.1|	Rho-related GTP-binding protein RhoU [Lepeophtheirus salmonis]	0.8	GO:0016020;GO:0007264;GO:0005622;GO:0005525	8090.ENSORLP00000013398	ras homolog gene family, member U	0.7513	COG1100	KOG0393	_	K07865	RHOU, WRCH1
comp181785_c0_seq4	209	3-629(-)	gi|290562231|gb|ADD38512.1|	Rho-related GTP-binding protein RhoU [Lepeophtheirus salmonis]	0.83	GO:0044446;GO:0008360;GO:0005515;GO:0005829;GO:0007010;GO:0005525;GO:0051056;GO:0005886	28377.ENSACAP00000002778	ras homolog gene family, member U	0.8071	COG1100	KOG0393	_	K07865	RHOU, WRCH1
comp181785_c0_seq5	294	3-884(-)	gi|290562231|gb|ADD38512.1|	Rho-related GTP-binding protein RhoU [Lepeophtheirus salmonis]	0.83	GO:0044446;GO:0008360;GO:0005515;GO:0005829;GO:0007010;GO:0005525;GO:0051056;GO:0005886	28377.ENSACAP00000002778	ras homolog gene family, member U	0.8071	COG1100	KOG0393	_	K07865	RHOU, WRCH1
comp181785_c0_seq6	267	123-923(-)	gi|290562231|gb|ADD38512.1|	Rho-related GTP-binding protein RhoU [Lepeophtheirus salmonis]	0.8	GO:0016020;GO:0007264;GO:0005622;GO:0005525	8090.ENSORLP00000013398	ras homolog gene family, member U	0.7513	COG1100	KOG0393	_	K07865	RHOU, WRCH1
comp181785_c0_seq7	311	3-935(-)	gi|290562231|gb|ADD38512.1|	Rho-related GTP-binding protein RhoU [Lepeophtheirus salmonis]	0.84	GO:0044446;GO:0008360;GO:0005515;GO:0005829;GO:0007010;GO:0005525;GO:0051056;GO:0005886	8090.ENSORLP00000013398	ras homolog gene family, member U	0.7771	COG1100	KOG0393	_	K07865	RHOU, WRCH1
comp181785_c0_seq8	226	3-680(-)	gi|290562231|gb|ADD38512.1|	Rho-related GTP-binding protein RhoU [Lepeophtheirus salmonis]	0.84	GO:0044446;GO:0008360;GO:0005515;GO:0005829;GO:0007010;GO:0005525;GO:0051056;GO:0005886	8090.ENSORLP00000013398	ras homolog gene family, member U	0.7771	COG1100	KOG0393	_	K07865	RHOU, WRCH1
comp181800_c1_seq1	148	120-563(-)	gi|383856822|ref|XP_003703906.1|	PREDICTED: ubiquitin-conjugating enzyme E2-17 kDa-like [Megachile rotundata]	0.96	GO:0070936;GO:0010008;GO:0005524;GO:0048132;GO:0007067;GO:0000122;GO:0007179;GO:0005875;GO:0005515;GO:0005829;GO:0030718;GO:0061418;GO:0005886;GO:0045087;GO:0005654;GO:0006281;GO:0006513;GO:0045676;GO:0051276;GO:0070979;GO:0030509;GO:0007286;GO:0006915;GO:0004842;GO:0007140;GO:0031647;GO:0008054;GO:0032480;GO:0006367;GO:0016322	7460.XP_001120139	similar to Ubiquitin-conjugating enzyme E2-17 kDa (Ubiquitin-protein ligase) (Ubiquitin carr [...]	0.9592	COG5078	KOG0417	_	K06689	UBE2D_E, UBC4, UBC5
comp181800_c1_seq2	148	160-603(-)	gi|383856822|ref|XP_003703906.1|	PREDICTED: ubiquitin-conjugating enzyme E2-17 kDa-like [Megachile rotundata]	0.94	GO:0070936;GO:0010008;GO:0005524;GO:0048132;GO:0007067;GO:0000122;GO:0007179;GO:0005875;GO:0005515;GO:0005829;GO:0030718;GO:0061418;GO:0005886;GO:0045087;GO:0005654;GO:0006281;GO:0006513;GO:0045676;GO:0051276;GO:0070979;GO:0030509;GO:0007286;GO:0006915;GO:0004842;GO:0007140;GO:0031647;GO:0008054;GO:0032480;GO:0006367;GO:0016322	7460.XP_001120139	similar to Ubiquitin-conjugating enzyme E2-17 kDa (Ubiquitin-protein ligase) (Ubiquitin carr [...]	0.9388	COG5078	KOG0417	_	K06689	UBE2D_E, UBC4, UBC5
comp181878_c1_seq1	470	1-1410(-)	gi|195132476|ref|XP_002010669.1|	GI21669 [Drosophila mojavensis]	0.57	GO:0016327;GO:0005921;GO:0016324;GO:0005243;GO:0007267;GO:0030727;GO:0007440;GO:0016331;GO:0042048;GO:0010496	_	_	_	_	_	_	None	_
comp181879_c0_seq1	210	470-1099(-)	gi|290562736|gb|ADD38763.1|	Ras-like protein [Lepeophtheirus salmonis]	0.94	GO:0016020;GO:0006184;GO:0007264;GO:0005525;GO:0003924	7165.AGAP002219-PA	AGAP002219-PA	0.9371	COG1100	KOG0395	_	K07827	KRAS, KRAS2
comp181879_c0_seq2	201	1410-2012(-)	gi|290562736|gb|ADD38763.1|	Ras-like protein [Lepeophtheirus salmonis]	0.94	GO:0016020;GO:0006184;GO:0007264;GO:0005525;GO:0003924	7165.AGAP002219-PA	AGAP002219-PA	0.9157	COG1100	KOG0395	_	K07827	KRAS, KRAS2
comp181879_c0_seq3	199	1504-2100(-)	gi|225713988|gb|ACO12840.1|	Ras-like protein precursor [Lepeophtheirus salmonis]	0.95	GO:0016020;GO:0006184;GO:0007264;GO:0005525;GO:0003924	7165.AGAP002219-PA	AGAP002219-PA	0.9398	COG1100	KOG0395	_	K07827	KRAS, KRAS2
comp181879_c0_seq4	206	1299-1916(-)	gi|290562736|gb|ADD38763.1|	Ras-like protein [Lepeophtheirus salmonis]	0.94	GO:0016020;GO:0006184;GO:0007264;GO:0005525;GO:0003924	7165.AGAP002219-PA	AGAP002219-PA	0.9257	COG1100	KOG0395	_	K07827	KRAS, KRAS2
comp181896_c0_seq1	341	1-1023(-)	gi|260817718|ref|XP_002603732.1|	hypothetical protein BRAFLDRAFT_283576 [Branchiostoma floridae]	0.59	GO:0006974;GO:0006259	_	_	_	_	_	_	K10738	MCM9
comp181896_c0_seq2	333	1-999(-)	gi|156388039|ref|XP_001634509.1|	predicted protein [Nematostella predicted protein [Nematostella vectensis]	0.65	GO:0006281	_	_	_	_	_	_	K10738	MCM9
comp181906_c1_seq1	266	337-1134(-)	gi|242013819|ref|XP_002427598.1|	Adapter molecule Crk, putative [Pediculus humanus corporis]	0.83	GO:0046330;GO:0005070;GO:0046529;GO:0007520;GO:0007298	7070.XP_970221	similar to Adapter molecule Crk	0.8008	_	KOG4792	_	K04438	CRK, CRKII
comp181919_c0_seq1	258	2-775(+)	gi|225719652|gb|ACO15672.1|	WD repeat domain phosphoinositide-interacting protein 4 [Caligus clemensi]	0.85	GO:0080025;GO:0032266;GO:0000045;GO:0005737	121224.XP_002424250	WD repeat domain phosphoinositide-interacting protein, putative	0.8025	_	KOG2111	_	None	_
comp181944_c0_seq1	192	120-695(-)	gi|290561044|gb|ADD37924.1|	GTP cyclohydrolase 1 [Lepeophtheirus salmonis]	0.86	GO:0051000;GO:0031410;GO:0014916;GO:0051260;GO:0032496;GO:0003934;GO:0042416;GO:0034341;GO:0005829;GO:0008270;GO:0031965;GO:0006184;GO:0050884;GO:0046656;GO:0042803;GO:0006729;GO:0046654;GO:0034612;GO:0043234;GO:0005525	8364.ENSXETP00000026690	GTP cyclohydrolase 1 (Dopa-responsive dystonia)	0.884	COG0302	KOG2698	_	K01495	E3.5.4.16, folE
comp181947_c0_seq1	366	101-1198(-)	gi|148227192|ref|NP_001080841.1|	guanine nucleotide binding protein (G protein), alpha 11 (Gq class) [Xenopus laevis]	0.62	GO:0007186;GO:0005488;GO:0005886	_	_	_	_	_	_	K04635	GNA11
comp181947_c0_seq2	370	101-1210(-)	gi|148227192|ref|NP_001080841.1|	guanine nucleotide binding protein (G protein), alpha 11 (Gq class) [Xenopus laevis]	0.61	GO:0007186;GO:0005488;GO:0005886	_	_	_	_	_	_	K04635	GNA11
comp181947_c0_seq3	118	33-386(-)	gi|354543383|emb|CCE40102.1|	hypothetical protein CPAR2_101400 [Candida parapsilosis]	0.62	GO:0007186;GO:0000747;GO:0044424;GO:0005488;GO:0005886;GO:0048610	_	_	_	_	_	_	K04640	GNA
comp1820353_c0_seq1	118	2-358(+)	gi|410920756|ref|XP_003973849.1|	PREDICTED: uncharacterized protein LOC101061973 [Takifugu rubripes]	0.89	GO:0003677;GO:0001525;GO:1901653;GO:0045893;GO:0030033;GO:0035914;GO:0005730;GO:0005667;GO:0005794;GO:0045449;GO:0003700;GO:0008284	31033.ENSTRUP00000019462	annotation not avaliable	0.8923	COG5048	KOG1721	_	K09206	KLF5
comp182084_c0_seq1	478	1-1434(-)	gi|241651245|ref|XP_002410277.1|	E3 ubiquitin ligase, putative [Ixodes scapularis]	0.94	GO:0005634;GO:0016567;GO:0007166;GO:0004842;GO:0023051;GO:0001784;GO:0005509;GO:0008270;GO:0004871	6945.ISCW019991-PA	E3 ubiquitin ligase, putative	0.9532	_	KOG1785	_	K04707	CBL
comp1821005_c0_seq1	352	_	gi|332023524|gb|EGI63760.1|	Kin of IRRE-like protein 3 [Acromyrmex echinatior]	0.77	GO:0016020;GO:0007169	_	_	_	_	_	_	None	_
comp182115_c0_seq1	103	165-473(-)	gi|290562383|gb|ADD38588.1|	AP-1 complex subunit sigma-1A [Lepeophtheirus salmonis]	0.91	GO:0008021;GO:0008565;GO:0016183;GO:0006886;GO:0035976;GO:0007269;GO:0030117;GO:0042051;GO:0007411	7159.AAEL000983-PC	clathrin coat assembly protein ap19	0.8673	COG5030	KOG0934	_	K12394	AP1S1_2
comp182115_c0_seq2	113	175-513(-)	gi|290562383|gb|ADD38588.1|	AP-1 complex subunit sigma-1A [Lepeophtheirus salmonis]	0.87	GO:0008021;GO:0008565;GO:0016183;GO:0006886;GO:0035976;GO:0007269;GO:0030117;GO:0042051;GO:0007411	7159.AAEL000983-PC	clathrin coat assembly protein ap19	0.8624	COG5030	KOG0934	_	K12394	AP1S1_2
comp182142_c0_seq2	384	1-1155(+)	gi|62857543|ref|NP_001017201.1|	nei endonuclease VIII-like 3 [Xenopus (Silurana) tropicalis]	0.57	GO:0043566;GO:0006281;GO:0003824	_	_	_	_	_	_	K10569	NEIL3
comp182142_c0_seq3	515	1-1545(+)	gi|62857543|ref|NP_001017201.1|	nei endonuclease VIII-like 3 [Xenopus (Silurana) tropicalis]	0.57	GO:0043566;GO:0006281;GO:0003824	_	_	_	_	_	_	K10569	NEIL3
comp182159_c0_seq5	585	_	gi|472373076|ref|XP_004406013.1|	PREDICTED: DNA ligase 4 [Odobenus rosmarus divergens]	0.64	GO:0043229;GO:0050794;GO:0006281;GO:0030154;GO:0002562;GO:0005488;GO:0044767	_	_	_	_	_	_	K10777	LIG4, DNL4
comp182167_c0_seq1	442	2-1327(+)	gi|242007020|ref|XP_002424340.1|	SAX, putative [Pediculus humanus corporis]	0.8	GO:0005025;GO:0031290;GO:0060041;GO:0030425;GO:0016020;GO:0005524;GO:0043025;GO:0007179;GO:0001550;GO:0001502;GO:0006703;GO:0009953;GO:0009069;GO:0006468;GO:0030509;GO:0035108;GO:0045669;GO:0030501;GO:0046332	121224.XP_002424340	SAX, putative SAX, putative	0.8067	COG0515	KOG2052	_	K13578	BMPR1B
comp182167_c0_seq2	96	96-386(+)	gi|321475113|gb|EFX86076.1|	putative TGF-beta receptor type I thick veins protein [Daphnia pulex]	0.82	GO:0016020;GO:0005524;GO:0009069;GO:0006468;GO:0005024;GO:0007178	_	_	_	_	_	_	K13579	BMPR1N
comp182167_c0_seq3	377	2-1132(+)	gi|345493964|ref|XP_001601240.2|	PREDICTED: bone morphogenetic protein receptor type-1B-like, partial [Nasonia vitripennis]	0.84	GO:0016020;GO:0005524;GO:0009069;GO:0006468;GO:0005024;GO:0007178	7425.XP_001601240	similar to DTFR	0.8426	COG0515	KOG2052	_	K13579	BMPR1N
comp182167_c0_seq4	252	2-757(+)	gi|345493964|ref|XP_001601240.2|	PREDICTED: bone morphogenetic protein receptor type-1B-like, partial [Nasonia vitripennis]	0.81	GO:0016020;GO:0005524;GO:0009069;GO:0006468;GO:0005024;GO:0007178	7425.XP_001601240	similar to DTFR	0.8085	COG0515	KOG2052	_	K13579	BMPR1N
comp182206_c0_seq2	1023	19-3087(-)	gi|321473952|gb|EFX84918.1|	hypothetical protein DAPPUDRAFT_314509 [Daphnia pulex]	0.78	GO:0044424;GO:0005488;GO:0007265	7070.XP_966992	similar to CG31536-PC, isoform C	0.8882	_	KOG3531	_	K06082	FARP2, FRG
comp182206_c0_seq4	118	19-372(-)	gi|291224481|ref|XP_002732232.1|	PREDICTED: FERM, RhoGEF and pleckstrin domain protein 2-like [Saccoglossus kowalevskii]	0.91	GO:0005856;GO:0019898;GO:0008092;GO:0005737;GO:0005543;GO:0016601;GO:0043087;GO:0035023;GO:0005089;GO:0016322	_	_	_	_	_	_	K06082	FARP2, FRG
comp182229_c0_seq1	362	24-1109(-)	gi|321477141|gb|EFX88100.1|	alpha-carbonic anhydrase [Daphnia pulex]	0.55	GO:0016829;GO:0008152;GO:0050896;GO:0044765	_	_	_	_	_	_	K01672	E4.2.1.1
comp182325_c0_seq1	1262	825-4610(+)	gi|91076064|ref|XP_966871.1|	PREDICTED: similar to CG34118 CG34118-PA [Tribolium castaneum]	0.76	GO:0031362;GO:0050839;GO:0007165;GO:0016167	_	_	_	_	_	_	None	_
comp182325_c0_seq2	1243	825-4553(+)	gi|91076064|ref|XP_966871.1|	PREDICTED: similar to CG34118 CG34118-PA [Tribolium castaneum]	0.76	GO:0031362;GO:0050839;GO:0007165;GO:0016167	_	_	_	_	_	_	None	_
comp182346_c0_seq2	374	_	gi|47219077|emb|CAG00216.1|	unnamed protein product [Tetraodon nigroviridis]	0.72	GO:0005783;GO:0009191;GO:0007165;GO:0044425;GO:0017110	_	_	_	_	_	_	K12304	CANT1
comp182352_c0_seq1	184	302-853(+)	gi|290462497|gb|ADD24296.1|	Ras-related protein Rap-2c [Lepeophtheirus salmonis]	0.96	GO:0016020;GO:0006184;GO:0007264;GO:0005525;GO:0003924	7460.XP_001120003	Ras-associated protein 2-like	0.9056	COG1100	KOG0395	_	None	_
comp182352_c0_seq4	184	302-853(+)	gi|290462497|gb|ADD24296.1|	Ras-related protein Rap-2c [Lepeophtheirus salmonis]	0.96	GO:0016020;GO:0006184;GO:0007264;GO:0005525;GO:0003924	7460.XP_001120003	Ras-associated protein 2-like	0.9056	COG1100	KOG0395	_	None	_
comp182370_c0_seq2	363	3-1091(+)	gi|223890174|ref|NP_001138802.1|	JAB-MPN domain protein [Bombyx JAB-MPN domain protein [Bombyx mori]	0.89	GO:0008237;GO:0008180;GO:0045944;GO:0051726;GO:0005737;GO:0010388;GO:0046328	7460.XP_623836	COP9 complex homolog subunit 5	0.9451	COG1310	KOG1554	_	K09613	COPS5, CSN5
comp182431_c0_seq1	546	175-1812(+)	gi|91091438|ref|XP_972410.1|	PREDICTED: similar to suppression of tumorigenicity [Tribolium castaneum]	0.88	GO:0005041;GO:0007165;GO:0005515;GO:0005887;GO:0040008;GO:0005905;GO:0006897	7070.XP_972410	similar to CG3634-PA	0.8845	_	KOG3807	_	None	_
comp182465_c0_seq3	122	123-488(-)	gi|195050452|ref|XP_001992896.1|	GH13392 [Drosophila grimshawi]	0.72	GO:0006281;GO:0004518	_	_	_	_	_	_	K10865	MRE11
comp182518_c0_seq3	469	336-1742(-)	gi|189237655|ref|XP_001812041.1|	PREDICTED: similar to AGAP007807-PA [Tribolium castaneum]	0.8	GO:0007165;GO:0005576;GO:0005179	7070.XP_001812041	similar to AGAP007807-PA	0.8043	_	KOG4341	_	K10268	FBXL2_20
comp182528_c0_seq1	344	220-1251(-)	gi|195386374|ref|XP_002051879.1|	GJ24688 [Drosophila virilis]	0.77	GO:0007455;GO:0046425;GO:0030713;GO:0007365;GO:0048103;GO:0045317;GO:0007442;GO:0005737;GO:0007538;GO:0006959;GO:0007298;GO:0042078;GO:0006457;GO:0007260;GO:0000910;GO:0035171;GO:0007476;GO:0019827;GO:0045475;GO:0007262;GO:0007616;GO:0001751;GO:0045610;GO:0060031;GO:0035206;GO:0004715;GO:0051607;GO:0007480;GO:0006968;GO:0007424;GO:0016476;GO:0051082;GO:0016318;GO:0035010;GO:0003383	7244.FBpp0239105	GJ24688	0.7838	COG0457	KOG0548	_	K09553	STIP1
comp182585_c0_seq2	248	1-744(-)	gi|296216763|ref|XP_002754735.1|	PREDICTED: lysine-specific demethylase 4D [Callithrix jacchus]	0.82	GO:0016702;GO:0007165;GO:0000790;GO:0006357;GO:0046872;GO:0050681;GO:0032454;GO:0033169;GO:0019899;GO:0008284	_	_	_	_	_	_	K06709	JMJD2, JHDM3
comp182585_c0_seq8	244	1-732(-)	gi|296216763|ref|XP_002754735.1|	PREDICTED: lysine-specific demethylase 4D [Callithrix jacchus]	0.82	GO:0016702;GO:0007165;GO:0000790;GO:0006357;GO:0046872;GO:0050681;GO:0032454;GO:0033169;GO:0019899;GO:0008284	_	_	_	_	_	_	K06709	JMJD2, JHDM3
comp182586_c0_seq1	173	3107-3625(-)	gi|321463604|gb|EFX74619.1|	hypothetical protein DAPPUDRAFT_324191 [Daphnia pulex]	0.96	GO:0016262;GO:0006110;GO:0043982;GO:0005515;GO:0048029;GO:0005829;GO:0006917;GO:0070688;GO:0008080;GO:0000123;GO:0005886;GO:0070207;GO:0043085;GO:0051571;GO:0043984;GO:0046626;GO:0045862;GO:0043981;GO:0042967;GO:0042277;GO:0030854;GO:0071300;GO:0035020;GO:0005547;GO:0006493;GO:0045944;GO:0080182;GO:0048015;GO:0008047	9031.ENSGALP00000008699	Putative uncharacterized protein	0.9638	_	KOG4626	_	K09667	OGT
comp182586_c0_seq2	179	1039-1575(-)	gi|321463604|gb|EFX74619.1|	hypothetical protein DAPPUDRAFT_324191 [Daphnia pulex]	0.96	GO:0005515;GO:0048029;GO:0006917;GO:0000123;GO:0045862;GO:0043995;GO:0043981;GO:0042277;GO:0071300;GO:0035020;GO:0005547;GO:0045944;GO:0048015;GO:0008047;GO:0046972;GO:0016262;GO:0006110;GO:0043982;GO:0005829;GO:0070688;GO:0005886;GO:0043085;GO:0070207;GO:0051571;GO:0043984;GO:0046626;GO:0005813;GO:0030854;GO:0042967;GO:0043996;GO:0006493;GO:0080182	9031.ENSGALP00000008699	Putative uncharacterized protein	0.9638	_	KOG4626	_	K09667	OGT
comp182586_c0_seq4	326	1-978(-)	gi|189235894|ref|XP_967579.2|	PREDICTED: similar to AGAP006254-PA [Tribolium castaneum]	0.96	GO:0046972;GO:0006110;GO:0070688;GO:0006917;GO:0000123;GO:0005886;GO:0051571;GO:0045862;GO:0046626;GO:0043995;GO:0005813;GO:0042967;GO:0030854;GO:0043996;GO:0071300;GO:0005547;GO:0035020;GO:0016757;GO:0048015;GO:0008047	7070.XP_967579	similar to AGAP006254-PA	0.9769	COG0457	KOG4626	_	K09667	OGT
comp182587_c0_seq1	223	3-671(+)	gi|321469145|gb|EFX80126.1|	hypothetical protein DAPPUDRAFT_243802 [Daphnia pulex]	0.68	GO:0032715;GO:0071356;GO:0005515;GO:0071347;GO:0071407;GO:0005667;GO:0043565;GO:0034616;GO:0003700;GO:0070301;GO:0000902;GO:0043249;GO:1901653;GO:0001701;GO:0035264;GO:0045944;GO:0045449	_	_	_	_	_	_	K09204	KLF1_2_4
comp182626_c0_seq1	239	1-717(+)	gi|321469195|gb|EFX80176.1|	hypothetical protein DAPPUDRAFT_304185 [Daphnia pulex]	0.76	GO:0043928;GO:0000176;GO:0035327;GO:0071034;GO:0006364;GO:0045830;GO:0004518;GO:0005730;GO:0000177;GO:0045006	7739.JGI277941	annotation not available	0.75	COG1097	KOG1004	_	K03681	RRP40, EXOSC3
comp182648_c1_seq1	77	177-407(-)	gi|195437420|ref|XP_002066638.1|	GK24460 [Drosophila willistoni]	0.79	GO:0006878;GO:0045277;GO:0006123;GO:0004129;GO:0017004;GO:0008535;GO:0007308;GO:0006825;GO:0031987;GO:0005743;GO:0016531;GO:0015992;GO:0002168;GO:0060361	_	_	_	_	_	_	K07152	K07152
comp182661_c0_seq1	297	3-893(-)	gi|162424329|gb|ABX89903.1|	inducible heat shock protein 70 [Tigriopus japonicus]	0.91	GO:0005524;GO:0006950	_	_	_	_	_	_	K03283	HSPA1_8
comp182661_c0_seq2	293	73-951(-)	gi|162424329|gb|ABX89903.1|	inducible heat shock protein 70 [Tigriopus japonicus]	0.89	GO:0005524;GO:0006950	_	_	_	_	_	_	K03283	HSPA1_8
comp182677_c0_seq3	464	182-1576(+)	gi|507656076|ref|XP_004634033.1|	PREDICTED: cAMP-specific 3',5'-cyclic phosphodiesterase 4B isoform X1 [Octodon degus]	0.69	GO:0046872;GO:0004114;GO:0007165;GO:0006144	_	_	_	_	_	_	K01120	E3.1.4.17, PDE
comp182677_c0_seq5	441	182-1507(+)	gi|507656076|ref|XP_004634033.1|	PREDICTED: cAMP-specific 3',5'-cyclic phosphodiesterase 4B isoform X1 [Octodon degus]	0.68	GO:0046872;GO:0004114;GO:0007165;GO:0006144	_	_	_	_	_	_	K01120	E3.1.4.17, PDE
comp182700_c0_seq1	355	3-1067(+)	gi|340383738|ref|XP_003390373.1|	PREDICTED: meiotic recombination protein DMC1/LIM15 homolog [Amphimedon queenslandica]	0.92	GO:0003677;GO:0006281;GO:0005524;GO:0008094	31033.ENSTRUP00000043486	DMC1 dosage suppressor of mck1 homolog, meiosis-specific homologous recombination (yeast)	0.9053	COG0468	KOG1434	_	K10872	DMC1
comp182739_c0_seq1	462	134-1519(+)	gi|405978527|gb|EKC42907.1|	DNA ligase 4 [Crassostrea gigas]	0.65	GO:0050794;GO:0070419;GO:0006260;GO:0006266;GO:0006289;GO:0046649;GO:0033151;GO:0003909;GO:0030097;GO:1901363;GO:0097159;GO:0005654;GO:0030154;GO:0010212;GO:0005694;GO:0006303	_	_	_	_	_	_	K10777	LIG4, DNL4
comp182739_c0_seq2	468	1-1404(+)	gi|405978527|gb|EKC42907.1|	DNA ligase 4 [Crassostrea gigas]	0.65	GO:0050794;GO:0070419;GO:0006260;GO:0006266;GO:0006289;GO:0046649;GO:0033151;GO:0003909;GO:0030097;GO:1901363;GO:0097159;GO:0005654;GO:0030154;GO:0010212;GO:0005694;GO:0006303	_	_	_	_	_	_	K10777	LIG4, DNL4
comp182748_c0_seq2	362	_	gi|499014807|ref|XP_004537874.1|	PREDICTED: dedicator of cytokinesis protein 1-like isoform X1 [Ceratitis capitata]	0.65	GO:0043087;GO:0007264;GO:0005085	_	_	_	_	_	_	None	_
comp182748_c0_seq5	204	1-615(+)	gi|395842707|ref|XP_003794155.1|	PREDICTED: dedicator of cytokinesis protein 1 [Otolemur garnettii]	0.7	GO:0006911;GO:0007596;GO:0005515;GO:0005829;GO:0007229;GO:0043547;GO:0007411;GO:0005096	_	_	_	_	_	_	K13708	DOCK1
comp182772_c0_seq1	180	614-1153(-)	gi|321463071|gb|EFX74089.1|	hypothetical protein DAPPUDRAFT_307454 [Daphnia pulex]	0.93	GO:0007264;GO:0005622;GO:0005525	7159.AAEL013761-PB	ADP-ribosylation factor, arf	0.9162	COG1100	KOG0070	_	K07977	ARF
comp1827888_c0_seq1	139	3-422(+)	gi|321479419|gb|EFX90375.1|	putative hedgehog receptor patched [Daphnia pulex]	0.83	GO:0010157;GO:0043616;GO:0072661;GO:0007346;GO:0061053;GO:0043433;GO:0060042;GO:0007420;GO:0042593;GO:0001658;GO:0005887;GO:0008158;GO:0045668;GO:0016485;GO:0008201;GO:0040015;GO:0030332;GO:0021997;GO:0021904;GO:0060037;GO:0048471;GO:0071397;GO:0005119;GO:0008544;GO:0005113;GO:0060644;GO:0032880;GO:0010002;GO:0001843;GO:0010875;GO:0072203;GO:0051782;GO:0035137;GO:0015485;GO:0003007;GO:0045879;GO:…	_	_	_	_	_	_	K06225	PTCH1
comp182790_c0_seq1	193	257-835(-)	gi|189240540|ref|XP_972600.2|	PREDICTED: similar to CG6954 CG6954-PA [Tribolium castaneum]	0.89	GO:0007165	7425.XP_001607721	similar to GA19980-PA	0.7801	_	KOG4485	_	None	_
comp182790_c0_seq4	120	257-616(-)	gi|189240540|ref|XP_972600.2|	PREDICTED: similar to CG6954 CG6954-PA [Tribolium castaneum]	0.89	GO:0007165	7425.XP_001607721	similar to GA19980-PA	0.8487	_	KOG4485	_	None	_
comp182811_c0_seq2	235	176-880(+)	gi|334324816|ref|XP_003340567.1|	PREDICTED: calmodulin-like [Monodelphis domestica]	0.62	GO:0006950	_	_	_	_	_	_	K12042	TNNC2
comp182824_c0_seq1	416	167-1414(+)	gi|512931082|ref|XP_004932220.1|	PREDICTED: LOW QUALITY PROTEIN: lissencephaly-1 homolog [Bombyx mori]	0.87	GO:0030425;GO:0005938;GO:0045502;GO:0007067;GO:0043025;GO:0048135;GO:0016319;GO:0005869;GO:0007303;GO:0051299;GO:0048814;GO:0051225;GO:0005828;GO:0007093;GO:0006886;GO:0019827;GO:0042052;GO:0000776;GO:0031616;GO:0030473;GO:0007283;GO:2001019;GO:0007405;GO:0051642;GO:0034501;GO:0030286;GO:0007294;GO:0030424;GO:0030510;GO:0008298;GO:0030234;GO:0030381;GO:0050790;GO:0042623;GO:0046716;GO:0072499;GO:…	7227.FBpp0086376	Lissencephaly-1; May positively regulate the activity of the minus-end directed microtubule [...]	0.8814	COG2319	KOG0295	_	K01062	E3.1.1.47, PAFAH
comp182824_c0_seq2	416	167-1414(+)	gi|512931082|ref|XP_004932220.1|	PREDICTED: LOW QUALITY PROTEIN: lissencephaly-1 homolog [Bombyx mori]	0.87	GO:0030425;GO:0005938;GO:0045502;GO:0007067;GO:0043025;GO:0048135;GO:0016319;GO:0005869;GO:0007303;GO:0051299;GO:0048814;GO:0051225;GO:0005828;GO:0007093;GO:0006886;GO:0019827;GO:0042052;GO:0000776;GO:0031616;GO:0030473;GO:0007283;GO:2001019;GO:0007405;GO:0051642;GO:0034501;GO:0030286;GO:0007294;GO:0030424;GO:0030510;GO:0008298;GO:0030234;GO:0030381;GO:0050790;GO:0042623;GO:0046716;GO:0072499;GO:…	7227.FBpp0086376	Lissencephaly-1; May positively regulate the activity of the minus-end directed microtubule [...]	0.8814	COG2319	KOG0295	_	K01062	E3.1.1.47, PAFAH
comp182841_c0_seq11	99	3-299(-)	gi|241247843|ref|XP_002402889.1|	5' nucleotidase, putative [Ixodes scapularis]	0.63	GO:0046872;GO:0006196;GO:0008253;GO:0046086;GO:0016311;GO:0005886;GO:0050728	_	_	_	_	_	_	K01081	E3.1.3.5
comp182841_c0_seq2	185	1-555(-)	gi|321477119|gb|EFX88078.1|	hypothetical protein DAPPUDRAFT_42388 [Daphnia pulex]	0.62	GO:0006196;GO:0008253;GO:0046086;GO:0016311;GO:0005488;GO:0005886;GO:0050728	_	_	_	_	_	_	K01081	E3.1.3.5
comp182841_c0_seq3	215	2-646(-)	gi|321477119|gb|EFX88078.1|	hypothetical protein DAPPUDRAFT_42388 [Daphnia pulex]	0.62	GO:0006196;GO:0008253;GO:0046086;GO:0016311;GO:0005488;GO:0005886;GO:0050728	_	_	_	_	_	_	K01081	E3.1.3.5
comp182841_c0_seq4	194	1-582(-)	gi|321477119|gb|EFX88078.1|	hypothetical protein DAPPUDRAFT_42388 [Daphnia pulex]	0.63	GO:0006196;GO:0008253;GO:0046086;GO:0016311;GO:0005488;GO:0005886;GO:0050728	_	_	_	_	_	_	K01081	E3.1.3.5
comp182847_c0_seq4	173	41-562(+)	gi|194762478|ref|XP_001963361.1|	GF20357 [Drosophila ananassae]	0.81	GO:0016327;GO:0005921;GO:0016324;GO:0005243;GO:0007267;GO:0030727;GO:0007440;GO:0016331;GO:0042048;GO:0010496	_	_	_	_	_	_	None	_
comp182856_c0_seq1	268	160-963(+)	gi|56790262|ref|NP_571369.1|	superoxide dismutase [Cu-Zn]	0.64	GO:0006801;GO:0004784;GO:0043231;GO:0009410;GO:0046914;GO:0070050;GO:0051597;GO:0044444;GO:0010038	_	_	_	_	_	_	K04565	E1.15.1.1C, sodC, SOD1
comp182856_c0_seq3	273	160-978(+)	gi|56790262|ref|NP_571369.1|	superoxide dismutase [Cu-Zn]	0.64	GO:0006801;GO:0004784;GO:0043231;GO:0009410;GO:0046914;GO:0070050;GO:0051597;GO:0044444;GO:0010038	_	_	_	_	_	_	K04565	E1.15.1.1C, sodC, SOD1
comp182856_c0_seq4	193	1-579(+)	gi|56790262|ref|NP_571369.1|	superoxide dismutase [Cu-Zn]	0.64	GO:0006801;GO:0004784;GO:0043231;GO:0009410;GO:0046914;GO:0070050;GO:0051597;GO:0044444;GO:0010038	_	_	_	_	_	_	K04565	E1.15.1.1C, sodC, SOD1
comp182856_c0_seq5	280	160-999(+)	gi|56790262|ref|NP_571369.1|	superoxide dismutase [Cu-Zn]	0.64	GO:0006801;GO:0004784;GO:0043231;GO:0009410;GO:0046914;GO:0070050;GO:0051597;GO:0044444;GO:0010038	_	_	_	_	_	_	K04565	E1.15.1.1C, sodC, SOD1
comp182861_c0_seq1	223	1-669(-)	gi|359372671|gb|AEV42204.1|	glucose-regulated protein 78kDa [Eurytemora affinis]	0.82	GO:0046872;GO:0005524;GO:0015994;GO:0006950;GO:0004655;GO:0006779	_	_	_	_	_	_	K09490	HSPA5, BIP
comp182861_c0_seq2	223	1-669(-)	gi|391338259|ref|XP_003743477.1|	PREDICTED: 78 kDa glucose-regulated protein-like isoform 1 [Metaseiulus occidentalis]	0.87	GO:0046872;GO:0005524;GO:0015994;GO:0006950;GO:0004655;GO:0006779	_	_	_	_	_	_	K09490	HSPA5, BIP
comp182874_c0_seq1	117	1-354(+)	gi|443695998|gb|ELT96779.1|	hypothetical protein CAPTEDRAFT_19566 [Capitella teleta]	0.72	GO:0000122;GO:0006457;GO:0005634;GO:0006986;GO:0051082;GO:0005829	6182.Q5DBZ2	SJCHGC09224 protein	0.8143	COG2214;COG0484	KOG0714	_	K09511	DNAJB5
comp182903_c0_seq1	831	536-3028(-)	gi|301775360|ref|XP_002923092.1|	PREDICTED: serine/threonine-protein kinase D2-like [Ailuropoda melanoleuca]	0.7	GO:0044707;GO:0006468;GO:0035556;GO:0010595;GO:0005488;GO:0007169;GO:0051091;GO:0071363;GO:0004672;GO:0009967;GO:0051239	99883.ENSTNIP00000020007	protein kinase D3	0.8893	COG0515	KOG4236	_	K06070	PKD
comp182903_c0_seq2	867	536-3136(-)	gi|507578358|ref|XP_004672697.1|	PREDICTED: serine/threonine-protein kinase D2 [Jaculus jaculus]	0.73	GO:0010595;GO:0001819;GO:0043167;GO:0007243;GO:0044424;GO:0090287;GO:0051091;GO:0000166;GO:0050852;GO:0006468;GO:0009069;GO:0010557;GO:0004674;GO:0045935;GO:0009967;GO:0031328;GO:0048010	99883.ENSTNIP00000020007	protein kinase D3	0.8893	COG0515	KOG4236	_	K06070	PKD
comp182903_c0_seq3	1205	_	gi|345306278|ref|XP_001512992.2|	PREDICTED: serine/threonine-protein kinase D1 [Ornithorhynchus anatinus]	0.91	GO:0005938;GO:0010837;GO:0048193;GO:0005911;GO:0045766;GO:0045087;GO:0042802;GO:1901727;GO:0006915;GO:0034599;GO:0045944;GO:0033138;GO:0043536;GO:0005524;GO:0038033;GO:0005829;GO:0001938;GO:0005886;GO:0005634;GO:0051092;GO:0009069;GO:0004697;GO:0010976;GO:0007030;GO:0045669;GO:0005802;GO:0005543;GO:0006954;GO:0043123;GO:0046872;GO:0032793;GO:0005794;GO:0060548	_	_	_	_	_	_	K06070	PKD
comp182912_c0_seq1	323	257-1225(-)	gi|225714606|gb|ACO13149.1|	Erlin-2 precursor [Lepeophtheirus salmonis]	0.86	GO:0032006	7460.XP_623822	similar to SPFH domain family, member 1	0.8807	_	KOG2962	_	None	_
comp182957_c0_seq1	452	134-1489(+)	gi|170045947|ref|XP_001850551.1|	single-stranded DNA-binding protein mssp-1 [Culex quinquefasciatus]	0.78	GO:0009629;GO:0003676	7176.CPIJ008970-PA	single-stranded DNA-binding protein mssp-1	0.7875	_	KOG0146;KOG4733	_	None	_
comp182957_c0_seq2	452	134-1489(+)	gi|170045947|ref|XP_001850551.1|	single-stranded DNA-binding protein mssp-1 [Culex quinquefasciatus]	0.78	GO:0009629;GO:0003676	7176.CPIJ008970-PA	single-stranded DNA-binding protein mssp-1	0.7875	_	KOG0146;KOG4733	_	None	_
comp182975_c0_seq1	204	3-617(+)	gi|393827422|gb|AFN25965.1|	innexin 2, partial [Cancer borealis]	0.66	GO:0016327;GO:0005921;GO:0016324;GO:0005243;GO:0007267;GO:0030727;GO:0007440;GO:0016331;GO:0042048;GO:0010496	_	_	_	_	_	_	None	_
comp182975_c0_seq2	270	3-815(+)	gi|393827422|gb|AFN25965.1|	innexin 2, partial [Cancer borealis]	0.68	GO:0016327;GO:0005921;GO:0016324;GO:0005243;GO:0007267;GO:0030727;GO:0007440;GO:0016331;GO:0042048;GO:0010496	_	_	_	_	_	_	None	_
comp183000_c0_seq3	380	2-1144(+)	gi|432933758|ref|XP_004081867.1|	PREDICTED: 1-phosphatidylinositol 4,5-bisphosphate phosphodiesterase delta-4-like [Oryzias latipes]	0.6	GO:0009395;GO:0007340;GO:0007165;GO:0005622;GO:0007242;GO:0004629	_	_	_	_	_	_	K05857	PLCD
comp183000_c0_seq4	386	2-1162(+)	gi|432933758|ref|XP_004081867.1|	PREDICTED: 1-phosphatidylinositol 4,5-bisphosphate phosphodiesterase delta-4-like [Oryzias latipes]	0.6	GO:0009395;GO:0007340;GO:0007165;GO:0005622;GO:0007242;GO:0004629	_	_	_	_	_	_	K05857	PLCD
comp183010_c0_seq1	448	284-1627(+)	gi|290462759|gb|ADD24427.1|	Protein pellino [Lepeophtheirus salmonis]	0.82	GO:0008063	7165.AGAP004232-PA	AGAP004232-PA	0.7594	_	KOG3842	_	K11964	PELI
comp183035_c0_seq1	140	1-423(+)	gi|327266254|ref|XP_003217921.1|	PREDICTED: l-amino-acid oxidase-like isoform 1 [Anolis carolinensis]	0.77	GO:0009094;GO:0006571;GO:0006531;GO:0000162;GO:0005764;GO:0055114;GO:0006574;GO:0006522;GO:0006555;GO:0001716;GO:0006552;GO:0009821;GO:0006952;GO:0006550	_	_	_	_	_	_	K03334	IL4I1
comp183035_c0_seq3	173	1-522(+)	gi|327266254|ref|XP_003217921.1|	PREDICTED: l-amino-acid oxidase-like isoform 1 [Anolis carolinensis]	0.77	GO:0009094;GO:0006571;GO:0006531;GO:0000162;GO:0005764;GO:0055114;GO:0006574;GO:0006522;GO:0006555;GO:0001716;GO:0006552;GO:0009821;GO:0006952;GO:0006550	_	_	_	_	_	_	K03334	IL4I1
comp183046_c0_seq1	698	121-2214(+)	gi|513188054|ref|XP_004941808.1|	PREDICTED: striatin-3 isoform X8 [Gallus gallus]	0.68	GO:0030425;GO:0070016;GO:0043025;GO:0000122;GO:0032355;GO:0005667;GO:0045944;GO:0005794;GO:0045449;GO:0005886;GO:0051721;GO:0003700;GO:0032403;GO:0033147	6945.ISCW012130-PA	striatin, putative	0.7943	COG2319	KOG0642	_	None	_
comp183053_c0_seq2	457	7-1377(-)	gi|357625360|gb|EHJ75828.1|	hypothetical protein KGM_11799 [Danaus plexippus]	0.61	GO:0015846;GO:0055085;GO:0044425;GO:0015837;GO:0015816;GO:0005515;GO:0005334;GO:0015375;GO:0048265;GO:0007268;GO:0006814;GO:0015844;GO:0006836;GO:0005886	_	_	_	_	_	_	K05038	SLC6A5S
comp183095_c0_seq1	365	2-1099(+)	gi|347970463|ref|XP_562586.3|	AGAP003711-PA [Anopheles gambiae str. PEST]	0.86	GO:0000220;GO:0007165;GO:0008021;GO:0009416;GO:0048388;GO:0006119;GO:0015991;GO:0005516;GO:0005769;GO:0009881;GO:0046961	_	_	_	_	_	_	K02154	ATPeVI, ATP6N1A
comp183095_c0_seq2	518	216-1772(+)	gi|347970463|ref|XP_562586.3|	AGAP003711-PA [Anopheles gambiae str. PEST]	0.88	GO:0000220;GO:0007165;GO:0008021;GO:0009416;GO:0048388;GO:0006119;GO:0015991;GO:0005516;GO:0005769;GO:0009881;GO:0046961	121224.XP_002422831	vacuolar proton translocating ATPase 116 kDa subunit A isoform, putative (EC:3.6.3.14)	0.8898	COG1269	KOG2189	_	K02154	ATPeVI, ATP6N1A
comp183113_c0_seq1	445	350-1684(+)	gi|432940693|ref|XP_004082719.1|	PREDICTED: ornithine decarboxylase-like [Oryzias latipes]	0.71	GO:0004586;GO:0001822;GO:0006560;GO:0006525;GO:0005829;GO:0009446;GO:0009615;GO:0008284	_	_	_	_	_	_	K01581	E4.1.1.17, ODC1, speC, speF
comp183152_c0_seq1	170	3-515(+)	gi|225709104|gb|ACO10398.1|	Ras-like protein 3 precursor [Caligus rogercresseyi]	0.97	GO:0016020;GO:0006184;GO:0007264;GO:0005525;GO:0003924	7460.XP_396692	roughened	0.9737	COG1100	KOG0395	_	K04353	RAP1A
comp183152_c0_seq2	202	3-608(+)	gi|156378358|ref|XP_001631110.1|	predicted protein [Nematostella predicted protein [Nematostella vectensis]	0.95	GO:0016020;GO:0006184;GO:0007264;GO:0005525;GO:0003924	45351.JGI187791	hypothetical protein	0.9511	COG1100	KOG0395	_	K04353	RAP1A
comp183152_c0_seq3	126	3-383(+)	gi|157123069|ref|XP_001653812.1|	RAS protein, putative [Aedes AAEL009377-PA [Aedes aegypti]	0.97	GO:0016020;GO:0006184;GO:0007264;GO:0005525;GO:0003924	7460.XP_396692	roughened	0.9725	COG1100	KOG0395	_	K04353	RAP1A
comp183152_c0_seq4	208	3-626(+)	gi|383856068|ref|XP_003703532.1|	PREDICTED: ras-related protein Rap-1b-like isoform 1 [Megachile rotundata]	0.93	GO:0016020;GO:0006184;GO:0004767;GO:0007264;GO:0005525;GO:0006687;GO:0003924	7425.XP_001608221	similar to RAS protein, putative	0.9344	COG1100	KOG0395	_	K04353	RAP1A
comp183152_c0_seq5	205	3-617(+)	gi|321455545|gb|EFX66674.1|	hypothetical protein DAPPUDRAFT_231811 [Daphnia pulex]	0.97	GO:0016020;GO:0006184;GO:0007264;GO:0005525;GO:0003924	7425.XP_001608221	similar to RAS protein, putative	0.9448	COG1100	KOG0395	_	K04353	RAP1A
comp183162_c0_seq4	280	35-874(+)	gi|157104780|ref|XP_001648565.1|	microtubule binding protein, putative [Aedes aegypti]	0.7	GO:0045298;GO:0007629;GO:0007059;GO:0035371;GO:0005881;GO:0035011;GO:0030589;GO:0005875;GO:0030951;GO:0005876;GO:0051225;GO:0008017;GO:0040001;GO:0000022;GO:0007605;GO:0007423	_	_	_	_	_	_	K10436	MAPRE
comp183209_c0_seq1	453	364-1722(+)	gi|66512717|ref|XP_396799.2|	PREDICTED: integrin-linked protein kinase-like [Apis mellifera]	0.86	GO:0004674;GO:0005524;GO:0004715;GO:0009069;GO:0006468;GO:0007229;GO:0009966	7460.XP_396799	similar to Integrin linked kinase CG10504-PA	0.8664	COG0515;COG0666	KOG0195	_	K06272	ILK
comp183210_c0_seq1	408	61-1284(+)	gi|189233809|ref|XP_971005.2|	PREDICTED: similar to trehalose receptor 1 [Tribolium castaneum]	0.74	GO:0007165;GO:0004871	7070.XP_971005	similar to CG3171-PA	0.7568	_	KOG3656	_	None	_
comp183216_c0_seq1	130	2-394(+)	gi|498952359|ref|XP_004523327.1|	PREDICTED: serine-rich adhesin for platelets-like isoform X1 [Ceratitis capitata]	0.63	GO:0005783;GO:0000381;GO:0007350;GO:0031987;GO:0005875;GO:0001964;GO:0000165;GO:0005634;GO:0048854;GO:0009069;GO:0035071;GO:0046777;GO:0009306;GO:0007548;GO:0004674;GO:0030717;GO:0042051	_	_	_	_	_	_	K08823	CLK
comp183232_c0_seq1	634	3-1904(+)	gi|359372671|gb|AEV42204.1|	glucose-regulated protein 78kDa [Eurytemora affinis]	0.96	GO:0046872;GO:0005524;GO:0015994;GO:0006950;GO:0004655;GO:0006779	7425.XP_001606463	similar to ENSANGP00000012893	0.939	COG0443	KOG0100	_	K09490	HSPA5, BIP
comp183232_c0_seq2	648	1-1944(+)	gi|359372671|gb|AEV42204.1|	glucose-regulated protein 78kDa [Eurytemora affinis]	0.93	GO:0046872;GO:0005524;GO:0015994;GO:0006950;GO:0004655;GO:0006779	7425.XP_001606463	similar to ENSANGP00000012893	0.9142	COG0443	KOG0100	_	K09490	HSPA5, BIP
comp183232_c0_seq3	634	73-1974(+)	gi|359372671|gb|AEV42204.1|	glucose-regulated protein 78kDa [Eurytemora affinis]	0.93	GO:0046872;GO:0005524;GO:0015994;GO:0006950;GO:0004655;GO:0006779	7425.XP_001606463	similar to ENSANGP00000012893	0.9142	COG0443	KOG0100	_	K09490	HSPA5, BIP
comp183256_c0_seq1	208	68-691(-)	gi|208431891|gb|ACI28282.1|	Cu-Zn superoxide dismutase [Cristaria plicata]	0.65	GO:0019430;GO:0004784;GO:0018991;GO:0042803;GO:0060378;GO:0007281;GO:0008340;GO:0040027;GO:0005829;GO:0005507;GO:0005739;GO:0001306;GO:0071688	_	_	_	_	_	_	K04565	E1.15.1.1C, sodC, SOD1
comp183262_c0_seq1	127	1-381(+)	gi|308502592|ref|XP_003113480.1|	CRE-SOD-1 protein [Caenorhabditis remanei]	0.67	GO:0019430;GO:0004784;GO:0018991;GO:0042803;GO:0060378;GO:0007281;GO:0008340;GO:0040027;GO:0005829;GO:0005507;GO:0005739;GO:0001306;GO:0071688	_	_	_	_	_	_	K04565	E1.15.1.1C, sodC, SOD1
comp183278_c0_seq1	392	111-1289(+)	gi|347441404|emb|CCD34325.1|	hypothetical protein BofuT4P19000006001 [Botryotinia fuckeliana T4]	0.99	GO:0016020;GO:0004553;GO:0005975;GO:0007218	_	_	_	_	_	_	None	_
comp183278_c0_seq2	388	111-1277(+)	gi|347441404|emb|CCD34325.1|	hypothetical protein BofuT4P19000006001 [Botryotinia fuckeliana T4]	0.99	GO:0016020;GO:0004553;GO:0005975;GO:0007218	_	_	_	_	_	_	None	_
comp183284_c0_seq1	547	52-1692(-)	gi|159488216|ref|XP_001702113.1|	asparagine synthase [Chlamydomonas reinhardtii]	0.71	GO:0008652;GO:0009743	_	_	_	_	_	_	K01953	E6.3.5.4, asnB
comp183284_c0_seq2	566	52-1749(-)	gi|159488216|ref|XP_001702113.1|	asparagine synthase [Chlamydomonas reinhardtii]	0.7	GO:0008652;GO:0009743	_	_	_	_	_	_	K01953	E6.3.5.4, asnB
comp183284_c0_seq3	542	52-1677(-)	gi|159488216|ref|XP_001702113.1|	asparagine synthase [Chlamydomonas reinhardtii]	0.7	GO:0008652;GO:0009743	_	_	_	_	_	_	K01953	E6.3.5.4, asnB
comp183284_c0_seq4	376	52-1179(-)	gi|159488216|ref|XP_001702113.1|	asparagine synthase [Chlamydomonas reinhardtii]	0.75	GO:0000166;GO:0006529;GO:0009746;GO:0016874	3055.JGI140252	asparagine synthase (EC:6.3.5.4)	0.7554	COG0367	KOG0571	_	K01953	E6.3.5.4, asnB
comp183302_c0_seq1	209	2-628(+)	gi|156552517|ref|XP_001599319.1|	PREDICTED: ADP-ribosylation factor-related protein 1-like [Nasonia vitripennis]	0.84	GO:0007264;GO:0005622;GO:0005525	7425.XP_001599319	similar to ENSANGP00000020929	0.837	COG1100	KOG0076	_	K07952	ARFRP1
comp183304_c0_seq1	468	1-1404(+)	gi|242021693|ref|XP_002431278.1|	TFIIH basal transcription factor complex p52 subunit, putative [Pediculus humanus corporis]	0.8	GO:0005657;GO:0006289;GO:0004003;GO:0000439	7460.XP_395476	general transcription factor IIH, polypeptide 4	0.7964	COG5144	KOG3471	_	K03144	TFIIH4, GTF2H4, TFB2
comp183363_c0_seq1	305	110-1024(-)	gi|478247228|pdb|4BDL|A	Chain A, Crystal Structure Of The Gluk2 K531a Lbd Dimer In Complex With Glutamate B Chain B, Crystal Structure Of The Gluk2 K531a Lbd Dimer In Complex Wi	0.61	GO:0016020;GO:0007165;GO:0005230;GO:0004872;GO:0006811	_	_	_	_	_	_	None	_
comp183369_c0_seq1	145	310-744(-)	gi|257096337|sp|Q804H7.2|BI52B_XENLA	RecName: Full=Baculoviral IAP repeat-containing protein 5.2-B; AltName: Full=Survivin in Xenopus; Short=SIX; AltName: Full=Survivin2-B; Short=XSurvivin2B 21362	0.68	GO:0045298;GO:0016324;GO:0007346;GO:0000087;GO:0005874;GO:0032133;GO:0030496;GO:0046983;GO:0015631;GO:0001944;GO:0005667;GO:0005819;GO:0000777;GO:0051384;GO:0045892;GO:0042493;GO:0005815;GO:0007165;GO:0042802;GO:0043434;GO:0006468;GO:0043066;GO:0006996;GO:0046872;GO:0046965;GO:0051301;GO:0051179;GO:0044444;GO:0019899;GO:0045787	_	_	_	_	_	_	K08731	BIRC5
comp183390_c0_seq11	162	3-491(+)	gi|149434019|ref|XP_001512648.1|	PREDICTED: GDP-D-glucose phosphorylase C15orf58 homolog [Ornithorhynchus anatinus]	0.52	GO:0070568;GO:0050896	_	_	_	_	_	_	K15630	VTC2
comp183390_c0_seq7	167	3-506(+)	gi|149434019|ref|XP_001512648.1|	PREDICTED: GDP-D-glucose phosphorylase C15orf58 homolog [Ornithorhynchus anatinus]	0.51	GO:0070568;GO:0050896	_	_	_	_	_	_	K15630	VTC2
comp183433_c0_seq2	584	224-1978(+)	gi|328724862|ref|XP_001946583.2|	PREDICTED: hypothetical protein LOC100165557 [Acyrthosiphon pisum]	0.61	GO:0003677;GO:0048190;GO:0007480;GO:0035060;GO:0045893;GO:0046530;GO:0008587;GO:0008586;GO:0042058;GO:0016055;GO:0007379	_	_	_	_	_	_	K11653	ARID1
comp183433_c0_seq3	1031	1-3093(+)	gi|194764523|ref|XP_001964378.1|	GF23141 [Drosophila ananassae]	0.81	GO:0003677;GO:0045941;GO:0048190;GO:0007480;GO:0035060;GO:0045893;GO:0046530;GO:0008587;GO:0008586;GO:0003713;GO:0005667;GO:0042058;GO:0016055;GO:0007379	_	_	_	_	_	_	K11653	ARID1
comp183433_c0_seq5	941	1-2823(+)	gi|194764523|ref|XP_001964378.1|	GF23141 [Drosophila ananassae]	0.81	GO:0003677;GO:0045941;GO:0048190;GO:0007480;GO:0035060;GO:0045893;GO:0046530;GO:0008587;GO:0008586;GO:0003713;GO:0005667;GO:0042058;GO:0016055;GO:0007379	_	_	_	_	_	_	K11653	ARID1
comp183433_c0_seq6	1072	1-3216(+)	gi|194764523|ref|XP_001964378.1|	GF23141 [Drosophila ananassae]	0.81	GO:0003677;GO:0045941;GO:0048190;GO:0007480;GO:0035060;GO:0045893;GO:0046530;GO:0008587;GO:0008586;GO:0003713;GO:0005667;GO:0042058;GO:0016055;GO:0007379	_	_	_	_	_	_	K11653	ARID1
comp183433_c0_seq7	774	3-2324(+)	gi|194764523|ref|XP_001964378.1|	GF23141 [Drosophila ananassae]	0.81	GO:0003677;GO:0045941;GO:0048190;GO:0007480;GO:0035060;GO:0045893;GO:0046530;GO:0008587;GO:0008586;GO:0003713;GO:0005667;GO:0042058;GO:0016055;GO:0007379	_	_	_	_	_	_	K11653	ARID1
comp183433_c0_seq8	900	1-2700(+)	gi|194764523|ref|XP_001964378.1|	GF23141 [Drosophila ananassae]	0.81	GO:0003677;GO:0045941;GO:0048190;GO:0007480;GO:0035060;GO:0045893;GO:0046530;GO:0008587;GO:0008586;GO:0003713;GO:0005667;GO:0042058;GO:0016055;GO:0007379	_	_	_	_	_	_	K11653	ARID1
comp183449_c2_seq1	739	_	gi|91076382|ref|XP_966492.1|	PREDICTED: similar to alpha-tubulin 1 isoform 1 [Tribolium castaneum]	0.98	GO:0045298;GO:0005524;GO:0007094;GO:0019730;GO:0016021;GO:0055085;GO:0006184;GO:0005813;GO:0042626;GO:0005200;GO:0003924;GO:0051258;GO:0000235;GO:0007052;GO:0006200;GO:0005525	_	_	_	_	_	_	K07374	TUBA
comp183453_c0_seq1	465	89-1483(-)	gi|340722677|ref|XP_003399730.1|	PREDICTED: ruvB-like 2-like [Bombus terrestris]	0.92	GO:0005524;GO:0006281;GO:0006355;GO:0031011;GO:0032508;GO:0071339;GO:0043141;GO:0006310;GO:0005657	7460.XP_001122537	RuvB-like 2	0.9286	COG1224	KOG2680	_	K11338	RUVBL2, RVB2, INO80J
comp183460_c0_seq1	2063	398-6586(+)	gi|189240896|ref|XP_972687.2|	PREDICTED: similar to AGAP000727-PA [Tribolium castaneum]	0.83	GO:0000166;GO:0004016;GO:0006144;GO:0016021;GO:0035556;GO:0006171	7070.XP_972687	similar to CG9533-PA	0.9386	COG2114	_	_	K08041	ADCY1
comp183460_c0_seq2	1891	398-6073(+)	gi|189240896|ref|XP_972687.2|	PREDICTED: similar to AGAP000727-PA [Tribolium castaneum]	0.83	GO:0000166;GO:0004016;GO:0006144;GO:0016021;GO:0035556;GO:0006171	7070.XP_972687	similar to CG9533-PA	0.9386	COG2114	_	_	K08041	ADCY1
comp183487_c0_seq4	254	1-765(+)	gi|198415810|ref|XP_002127593.1|	PREDICTED: atlastin-2 [Ciona intestinalis]	0.74	GO:0030514;GO:0048263;GO:0005770	_	_	_	_	_	_	None	_
comp183496_c0_seq1	220	64-723(-)	gi|225713470|gb|ACO12581.1|	Peroxiredoxin-4 [Lepeophtheirus Peroxiredoxin-4 [Lepeophtheirus salmonis]	0.88	GO:0006979;GO:0006804;GO:0004601;GO:0055114;GO:0051920	6945.ISCW013767-PA	thioredoxin peroxidase, putative	0.8558	COG0450	KOG0852	_	K03386	E1.11.1.15, PRDX, ahpC
comp183496_c0_seq2	220	157-816(-)	gi|225713470|gb|ACO12581.1|	Peroxiredoxin-4 [Lepeophtheirus Peroxiredoxin-4 [Lepeophtheirus salmonis]	0.88	GO:0006979;GO:0006804;GO:0004601;GO:0055114;GO:0051920	6945.ISCW013767-PA	thioredoxin peroxidase, putative	0.8558	COG0450	KOG0852	_	K03386	E1.11.1.15, PRDX, ahpC
comp183505_c0_seq1	148	1-444(-)	gi|225718740|gb|ACO15216.1|	Carbonic anhydrase 2 [Caligus clemensi]	0.71	GO:0044707;GO:0044767;GO:0044281;GO:0015701;GO:0005829;GO:0008270;GO:0050896;GO:0009987;GO:0048856;GO:0045177	_	_	_	_	_	_	K01672	E4.2.1.1
comp183538_c0_seq1	837	297-2810(+)	gi|260781317|ref|XP_002585764.1|	hypothetical protein BRAFLDRAFT_128184 [Branchiostoma floridae]	0.53	GO:0044260;GO:0048522;GO:0016310;GO:0048513;GO:0010627;GO:0005515;GO:0004672;GO:0044238;GO:0044767	_	_	_	_	_	_	K04527	INSR
comp183551_c0_seq1	305	235-1149(-)	gi|241153701|ref|XP_002407137.1|	MCM2 protein, putative [Ixodes MCM2 protein, putative [Ixodes scapularis]	0.85	GO:0005634;GO:0042325;GO:0005524;GO:0006270;GO:0006268;GO:0004003;GO:0003697;GO:0008283;GO:0042555;GO:0006974;GO:0005657	_	_	_	_	_	_	K02540	MCM2
comp183585_c0_seq1	264	58-849(-)	gi|332024090|gb|EGI64307.1|	DNA excision repair protein ERCC-1 [Acromyrmex echinatior]	0.74	GO:0005634;GO:0006281;GO:0003684;GO:0004519	7425.XP_001603974	similar to excision repair cross-complementing 1 ercc1	0.7876	COG5241	KOG2841	_	K10849	ERCC1
comp183603_c0_seq1	405	1-1215(+)	gi|361050095|emb|CCA94924.1|	hemocyanin subunit c [Mastigoproctus giganteus]	0.53	GO:0006582;GO:0006952;GO:0005576;GO:0016491	_	_	_	_	_	_	None	_
comp183603_c0_seq5	349	3-1049(+)	gi|361050095|emb|CCA94924.1|	hemocyanin subunit c [Mastigoproctus giganteus]	0.55	GO:0006582;GO:0006952;GO:0005576;GO:0016491	_	_	_	_	_	_	None	_
comp183611_c1_seq1	841	70-2592(+)	gi|170033969|ref|XP_001844848.1|	cdk10/11 [Culex cdk10/11 [Culex quinquefasciatus]	0.67	GO:0007224;GO:0016772	7176.CPIJ003403-PA	cdk10/11	0.8297	COG0515	KOG0663	_	K08818	CDC2L
comp183675_c0_seq1	1465	1-4395(-)	gi|270014550|gb|EFA10998.1|	hypothetical protein TcasGA2_TC004583 [Tribolium castaneum]	0.72	GO:0007165	_	_	_	_	_	_	None	_
comp183675_c0_seq2	1436	1-4308(-)	gi|270014550|gb|EFA10998.1|	hypothetical protein TcasGA2_TC004583 [Tribolium castaneum]	0.72	GO:0007165	_	_	_	_	_	_	None	_
comp183686_c0_seq1	426	2-1279(+)	gi|380019729|ref|XP_003693755.1|	PREDICTED: uncharacterized protein LOC100866731 [Apis florea]	0.87	GO:0035556	7425.XP_001603336	similar to CG8146-PA	0.9119	_	KOG4566	_	K04700	SOCSN
comp183700_c0_seq1	564	251-1942(+)	gi|241701230|ref|XP_002411906.1|	serine/threonine protein kinase, putative [Ixodes scapularis]	0.79	GO:0004674;GO:0007165;GO:0005524;GO:0009069;GO:0006468	6945.ISCW021388-PA	serine/threonine protein kinase, putative	0.9239	COG0515	KOG0574	_	K04412	STK3, MST2
comp183700_c0_seq2	564	251-1942(+)	gi|241701230|ref|XP_002411906.1|	serine/threonine protein kinase, putative [Ixodes scapularis]	0.79	GO:0004674;GO:0007165;GO:0005524;GO:0009069;GO:0006468	6945.ISCW021388-PA	serine/threonine protein kinase, putative	0.9239	COG0515	KOG0574	_	K04412	STK3, MST2
comp183703_c0_seq3	2158	151-6624(+)	gi|91079108|ref|XP_975359.1|	PREDICTED: similar to conserved hypothetical protein [Tribolium castaneum]	0.62	GO:0035211;GO:0005634;GO:0007483;GO:0007479;GO:0010629;GO:0006351;GO:0016319;GO:0043704;GO:0002121;GO:0000166;GO:0035263;GO:0042051;GO:0042048;GO:0007411;GO:0048098;GO:0008157	_	_	_	_	_	_	None	_
comp183747_c0_seq1	208	2-625(+)	gi|345490407|ref|XP_003426367.1|	PREDICTED: ras-related protein Ral-a-like isoform 2 [Nasonia vitripennis]	0.87	GO:0016020;GO:0006184;GO:0007264;GO:0005525;GO:0003924	7159.AAEL014749-PB	ral	0.8507	COG1100	KOG0395	_	K07834	RALA
comp183763_c0_seq1	420	194-1453(-)	gi|125981823|ref|XP_001354915.1|	GA18281 [Drosophila pseudoobscura pseudoobscura]	0.65	GO:0016327;GO:0005921;GO:0016324;GO:0005243;GO:0007267;GO:0030727;GO:0007440;GO:0016331;GO:0042048;GO:0010496	_	_	_	_	_	_	None	_
comp183789_c0_seq2	985	55-3012(+)	gi|345480050|ref|XP_003424076.1|	PREDICTED: E3 ubiquitin-protein ligase mib1-like [Nasonia vitripennis]	0.91	GO:0001841;GO:0031410;GO:0016567;GO:0001568;GO:0045807;GO:0005515;GO:0008270;GO:0001756;GO:0005886;GO:0031965;GO:0005813;GO:0001701;GO:0004842;GO:0045665;GO:0001947;GO:0007219	7070.XP_974870	similar to mindbomb homolog 1	0.9307	COG0666	KOG0504	_	K10645	MIB
comp183789_c0_seq3	1084	55-3306(+)	gi|345480050|ref|XP_003424076.1|	PREDICTED: E3 ubiquitin-protein ligase mib1-like [Nasonia vitripennis]	0.91	GO:0001841;GO:0031410;GO:0016567;GO:0001568;GO:0045807;GO:0005515;GO:0008270;GO:0001756;GO:0005886;GO:0031965;GO:0005813;GO:0001701;GO:0004842;GO:0045665;GO:0001947;GO:0007219	7070.XP_974870	similar to mindbomb homolog 1	0.9307	COG0666	KOG0504	_	K10645	MIB
comp183789_c0_seq4	992	55-3033(+)	gi|345480050|ref|XP_003424076.1|	PREDICTED: E3 ubiquitin-protein ligase mib1-like [Nasonia vitripennis]	0.91	GO:0001841;GO:0031410;GO:0016567;GO:0001568;GO:0045807;GO:0005515;GO:0008270;GO:0001756;GO:0005886;GO:0031965;GO:0005813;GO:0001701;GO:0004842;GO:0045665;GO:0001947;GO:0007219	7070.XP_974870	similar to mindbomb homolog 1	0.9307	COG0666	KOG0504	_	K10645	MIB
comp183789_c0_seq5	1091	55-3327(+)	gi|345480050|ref|XP_003424076.1|	PREDICTED: E3 ubiquitin-protein ligase mib1-like [Nasonia vitripennis]	0.91	GO:0001841;GO:0031410;GO:0016567;GO:0001568;GO:0045807;GO:0005515;GO:0008270;GO:0001756;GO:0005886;GO:0031965;GO:0005813;GO:0001701;GO:0004842;GO:0045665;GO:0001947;GO:0007219	7070.XP_974870	similar to mindbomb homolog 1	0.9307	COG0666	KOG0504	_	K10645	MIB
comp183846_c0_seq1	507	92-1612(-)	gi|241644679|ref|XP_002411077.1|	WD-repeat protein, putative [Ixodes scapularis]	0.83	GO:0045892;GO:0003714;GO:0000785;GO:0004402;GO:0042967;GO:0016573;GO:0044212;GO:0043627;GO:0016481;GO:0043161;GO:0003682;GO:0045944;GO:0045444;GO:0005667;GO:0000123	99883.ENSTNIP00000013725	transducin (beta)-like 1 X-linked receptor 1	0.8097	COG2319	KOG0273	_	K04508	TBL1
comp183858_c0_seq1	130	98-487(-)	gi|145306445|gb|ABP57024.1|	centrin 1 [Elaphodus cephalophus]	0.92	GO:0045298;GO:0005524;GO:0007283;GO:0055114;GO:0008026;GO:0006289;GO:0031683;GO:0032465;GO:0032440;GO:0032391;GO:0007099;GO:0008017;GO:0003676;GO:0032795;GO:0005814;GO:0005932;GO:0005509;GO:0071942	7159.AAEL005663-PA	centrin	0.9297	COG5126	KOG0028	_	K10840	CETN2
comp183858_c0_seq2	175	98-622(-)	gi|242012892|ref|XP_002427159.1|	Centrin-1, putative [Pediculus humanus corporis]	0.91	GO:0045298;GO:0005524;GO:0007283;GO:0055114;GO:0008026;GO:0006289;GO:0031683;GO:0032465;GO:0032440;GO:0032391;GO:0007099;GO:0008017;GO:0003676;GO:0032795;GO:0005814;GO:0005932;GO:0005509;GO:0071942	7159.AAEL005663-PA	centrin	0.9045	COG5126	KOG0028	_	K10840	CETN2
comp183871_c0_seq1	213	1090-1728(-)	gi|91089049|ref|XP_969998.1|	PREDICTED: similar to AGAP011768-PA [Tribolium castaneum]	0.93	GO:0005070;GO:0045678;GO:0008293;GO:0008360;GO:0008355;GO:0007476;GO:0045500;GO:0007015;GO:0005118;GO:0008595;GO:0005886;GO:0001700;GO:0007265;GO:0007614;GO:0007175	7070.XP_969998	similar to AGAP011768-PA	0.9289	_	KOG3601	_	K04364	GRB2
comp183871_c0_seq2	213	448-1086(-)	gi|91089049|ref|XP_969998.1|	PREDICTED: similar to AGAP011768-PA [Tribolium castaneum]	0.93	GO:0005070;GO:0045678;GO:0008293;GO:0008360;GO:0008355;GO:0007476;GO:0045500;GO:0007015;GO:0005118;GO:0008595;GO:0005886;GO:0001700;GO:0007265;GO:0007614;GO:0007175	7070.XP_969998	similar to AGAP011768-PA	0.9289	_	KOG3601	_	K04364	GRB2
comp183900_c0_seq1	196	116-706(+)	gi|345486911|ref|XP_001607373.2|	PREDICTED: glycerol-3-phosphate dehydrogenase [NAD+]	0.79	GO:0046486;GO:0006094;GO:0046168;GO:0006118;GO:0071356;GO:0051287;GO:0042803;GO:0004367;GO:0071320;GO:0055114;GO:0009331;GO:0005739;GO:0004368	7425.XP_001607373	similar to glycerol-3-phosphate dehydrogenase	0.7887	COG0240	KOG2711	_	K00006	E1.1.1.8, GPD1
comp183900_c0_seq2	196	334-924(+)	gi|344267936|ref|XP_003405820.1|	PREDICTED: glycerol-3-phosphate dehydrogenase [NAD+]	0.8	GO:0046486;GO:0006094;GO:0046168;GO:0006118;GO:0071356;GO:0051287;GO:0042803;GO:0004367;GO:0071320;GO:0055114;GO:0009331;GO:0005739;GO:0004368	9615.ENSCAFP00000012187	glycerol-3-phosphate dehydrogenase 1 (soluble)	0.8051	COG0240	KOG2711	_	K00006	E1.1.1.8, GPD1
comp183901_c0_seq1	400	3-1202(+)	gi|195475872|ref|XP_002090207.1|	GE12980 [Drosophila yakuba]	0.88	GO:0005086;GO:0005802;GO:0016192;GO:0005543;GO:0043087;GO:0032012;GO:0040018;GO:0030155;GO:0005886	7245.FBpp0257990	GE12980	0.9099	COG5307	KOG0930	_	None	_
comp183901_c0_seq2	335	3-1010(+)	gi|195475872|ref|XP_002090207.1|	GE12980 [Drosophila yakuba]	0.88	GO:0005086;GO:0005802;GO:0016192;GO:0005543;GO:0043087;GO:0032012;GO:0040018;GO:0030155;GO:0005886	7245.FBpp0257990	GE12980	0.9135	COG5307	KOG0930	_	None	_
comp183901_c0_seq3	419	3-1259(+)	gi|193620450|ref|XP_001950773.1|	PREDICTED: cytohesin-1-like [Acyrthosiphon pisum]	0.89	GO:0005086;GO:0005802;GO:0016192;GO:0005543;GO:0043087;GO:0032012;GO:0040018;GO:0030155;GO:0005886	7245.FBpp0257990	GE12980	0.9038	COG5307	KOG0930	_	None	_
comp183907_c0_seq1	332	67-1062(-)	gi|195505401|ref|XP_002099488.1|	GE23324 [Drosophila yakuba]	0.75	GO:0006694;GO:0014019;GO:0033554;GO:0043066;GO:0000010	7227.FBpp0085131	CG31005	0.7576	COG0142	KOG0776	_	K12504	PDSS1
comp183907_c0_seq2	402	67-1272(-)	gi|195505401|ref|XP_002099488.1|	GE23324 [Drosophila yakuba]	0.75	GO:0006694;GO:0014019;GO:0033554;GO:0043066;GO:0000010	7227.FBpp0085131	CG31005	0.7576	COG0142	KOG0776	_	K12504	PDSS1
comp183916_c0_seq1	104	3-314(+)	gi|321471831|gb|EFX82803.1|	hypothetical protein DAPPUDRAFT_302358 [Daphnia pulex]	0.68	GO:0071456;GO:0006412	_	_	_	_	_	_	K03113	EIF1, SUI1
comp183917_c0_seq3	370	_	gi|321468349|gb|EFX79334.1|	hypothetical protein DAPPUDRAFT_304861 [Daphnia pulex]	0.82	GO:0005856;GO:0007165;GO:0035335;GO:0030971;GO:0001946;GO:0004725;GO:0006570	_	_	_	_	_	_	K01104	E3.1.3.48
comp183935_c0_seq3	180	1-540(+)	gi|322510316|gb|ADX05543.1|	calcium/calmodulin-dependent protein kinase II isoform C [Periplaneta americana]	0.69	GO:0030424;GO:0030425;GO:0048786;GO:0009069;GO:0006468;GO:0007616;GO:0008049;GO:0004683;GO:0000166;GO:0007268;GO:0005516;GO:0060278;GO:0005886;GO:0051489;GO:0045211	_	_	_	_	_	_	K04515	CAMK2
comp183946_c0_seq1	363	2-1090(+)	gi|91089871|ref|XP_971540.1|	PREDICTED: similar to Glycoprotein 93 CG5520-PA [Tribolium castaneum]	0.84	GO:0006457;GO:0005524;GO:0051082;GO:0006950	_	_	_	_	_	_	K09487	HSP90B, TRA1
comp183989_c0_seq1	494	622-2103(-)	gi|12060812|gb|AAG48248.1|AF282407_1	p70 ribosomal protein S6 kinase [Artemia franciscana]	0.84	GO:0005840;GO:0007165;GO:0005524;GO:0009069;GO:0006468;GO:0004697	7460.XP_395876	similar to RPS6-p70-protein kinase CG10539-PA	0.8559	COG0515	KOG0598	_	K04688	RPS6KB
comp183989_c0_seq2	494	402-1883(-)	gi|12060812|gb|AAG48248.1|AF282407_1	p70 ribosomal protein S6 kinase [Artemia franciscana]	0.84	GO:0005840;GO:0007165;GO:0005524;GO:0009069;GO:0006468;GO:0004697	7460.XP_395876	similar to RPS6-p70-protein kinase CG10539-PA	0.8559	COG0515	KOG0598	_	K04688	RPS6KB
comp1840144_c0_seq1	125	2-376(-)	gi|195113121|ref|XP_002001117.1|	GI22147 [Drosophila mojavensis]	0.58	GO:0050896	_	_	_	_	_	_	None	_
comp184031_c1_seq1	714	62-2203(+)	gi|319738741|gb|ADV59561.1|	heat shock protein 90 [Paracyclopina nana]	0.92	GO:0006457;GO:0005524;GO:0051082;GO:0006950	7425.XP_001605191	similar to mCG14932	0.9066	COG0326	KOG0019	_	K04079	htpG, HSP90A
comp184057_c0_seq1	356	186-1253(-)	gi|56118775|ref|NP_001008184.1|	WD repeat domain phosphoinositide-interacting protein 3 [Xenopus (Silurana) WIPI3_XENTR RecName: Full=WD repeat domain phosphoinosi	0.82	GO:0080025;GO:0032266;GO:0000045;GO:0005737	8364.ENSXETP00000049343	Wdr45l-prov protein	0.8375	_	KOG2111	_	None	_
comp184073_c0_seq3	417	1-1251(+)	gi|195351293|ref|XP_002042169.1|	GM10477 [Drosophila sechellia]	0.49	GO:0070918;GO:0032501;GO:0048856	_	_	_	_	_	_	None	_
comp184073_c0_seq5	423	1-1269(+)	gi|195351293|ref|XP_002042169.1|	GM10477 [Drosophila sechellia]	0.49	GO:0070918;GO:0032501;GO:0048856	_	_	_	_	_	_	None	_
comp184075_c0_seq1	601	53-1855(-)	gi|307180438|gb|EFN68464.1|	Caseinolytic peptidase B protein-like protein [Camponotus floridanus]	0.77	GO:0000166;GO:0034605	9913.ENSBTAP00000001687	Caseinolytic peptidase B protein homolog (Suppressor of potassium transport defect 3); May f [...]	0.79	COG0542	KOG1051	_	K03695	clpB
comp184076_c0_seq1	192	2-577(+)	gi|242017319|ref|XP_002429137.1|	Soluble calcium-activated nucleotidase, putative [Pediculus humanus corporis]	0.8	GO:0007165;GO:0016462;GO:0005509	_	_	_	_	_	_	K12304	CANT1
comp184096_c0_seq3	254	45-806(-)	gi|91095255|ref|XP_972562.1|	PREDICTED: similar to AGAP006992-PA [Tribolium castaneum]	0.57	GO:0016020;GO:0007165	_	_	_	_	_	_	None	_
comp184135_c0_seq1	127	3-383(-)	gi|162424329|gb|ABX89903.1|	inducible heat shock protein 70 [Tigriopus japonicus]	0.98	GO:0005524;GO:0006950	81824.JGI31085	hypothetical protein	0.9449	_	KOG0101	_	K03283	HSPA1_8
comp184135_c0_seq2	704	_	gi|162424329|gb|ABX89903.1|	inducible heat shock protein 70 [Tigriopus japonicus]	0.93	GO:0005524;GO:0006950	_	_	_	_	_	_	K03283	HSPA1_8
comp184135_c1_seq1	282	1-849(+)	gi|162424329|gb|ABX89903.1|	inducible heat shock protein 70 [Tigriopus japonicus]	0.96	GO:0005524;GO:0006950	_	_	_	_	_	_	K03283	HSPA1_8
comp184159_c0_seq6	546	26-1666(+)	gi|164663801|ref|NP_001106874.1|	leucyl-cystinyl aminopeptidase isoform 1 [Rattus norvegicus]	0.54	GO:0016020;GO:0050794;GO:0044700;GO:0043231;GO:0007154;GO:0031982;GO:0043171;GO:0005488;GO:0070011;GO:0050896;GO:0044444	_	_	_	_	_	_	K01257	LNPEP
comp184170_c0_seq1	134	133-534(-)	gi|291237670|ref|XP_002738749.1|	PREDICTED: ADP-ribosylation factor-like 2-like [Saccoglossus kowalevskii]	0.9	GO:0007021;GO:0031116;GO:0051297;GO:0005515;GO:0005095;GO:0007264;GO:0016328;GO:0010811;GO:0051457;GO:0005634;GO:0019003;GO:0005758;GO:0005813;GO:0003924;GO:0005742;GO:0070830;GO:0005525;GO:0034260;GO:0007049	7070.XP_975625	similar to CG7435-PA	0.896	COG1100	KOG0073	_	K07943	ARL2
comp184170_c0_seq2	199	133-729(-)	gi|291237670|ref|XP_002738749.1|	PREDICTED: ADP-ribosylation factor-like 2-like [Saccoglossus kowalevskii]	0.92	GO:0007021;GO:0031116;GO:0051297;GO:0005515;GO:0005095;GO:0007264;GO:0016328;GO:0010811;GO:0051457;GO:0005634;GO:0019003;GO:0005758;GO:0005813;GO:0003924;GO:0005742;GO:0070830;GO:0005525;GO:0034260;GO:0007049	7739.JGI121277	hypothetical protein	0.9186	COG1100	KOG0073	_	K07943	ARL2
comp184186_c0_seq1	289	2-871(+)	gi|359372673|gb|AEV42205.1|	cytosolic heat shock protein 90kDa [Eurytemora affinis]	0.93	GO:0006457;GO:0005524;GO:0051082;GO:0006950	7260.FBpp0245050	GK15907	0.9068	COG0326	KOG0019	_	K04079	htpG, HSP90A
comp184200_c0_seq1	188	3-566(-)	gi|225712308|gb|ACO12000.1|	GTP-binding protein Rheb precursor [Lepeophtheirus salmonis]	0.82	GO:0016020;GO:0006184;GO:0007264;GO:0005525;GO:0003924	7460.XP_392564	GTP-binding protein Rheb homolog	0.8122	COG1100	KOG0395	_	K07208	RHEB
comp184200_c0_seq2	175	1-525(-)	gi|506968271|gb|AGM32479.1|	GTP-binding protein Rheb-like protein [Coptotermes formosanus]	0.82	GO:0016020;GO:0006184;GO:0004767;GO:0007264;GO:0005525;GO:0006687;GO:0003924	7425.XP_001599091	PREDICTED: similar to RAS, putative [Nasonia vitripennis].	0.8166	COG1100	KOG0395	_	K07208	RHEB
comp1842329_c0_seq1	147	2-445(+)	gi|391344452|ref|XP_003746513.1|	PREDICTED: legumain-like [Metaseiulus occidentalis]	0.78	GO:0006508;GO:0019886;GO:0004197;GO:0043524;GO:0043202;GO:0042359;GO:0045087	9796.ENSECAP00000008589	legumain	0.7877	COG5206	_	_	K01369	LGMN
comp184237_c0_seq1	439	2-1318(+)	gi|332021988|gb|EGI62314.1|	Heat shock 70 kDa protein cognate 4 [Acromyrmex echinatior]	0.86	GO:0005524;GO:0006950	8364.ENSXETP00000019397	heat shock 70kDa protein 1-like	0.869	COG0443	KOG0101	_	K03283	HSPA1_8
comp184237_c0_seq3	177	2-532(+)	gi|332021988|gb|EGI62314.1|	Heat shock 70 kDa protein cognate 4 [Acromyrmex echinatior]	0.75	GO:0005524;GO:0006950	_	_	_	_	_	_	K03283	HSPA1_8
comp184249_c0_seq2	214	4-645(-)	gi|225719484|gb|ACO15588.1|	J domain-containing protein C3E7.11c [Caligus clemensi]	0.63	GO:0044260;GO:0046872;GO:0005515;GO:0044238;GO:0006950	_	_	_	_	_	_	K09504	DNAJA3
comp184277_c0_seq1	263	1-792(+)	gi|340373457|ref|XP_003385258.1|	PREDICTED: endoribonuclease Dicer-like [Amphimedon queenslandica]	0.61	GO:0097159;GO:0006396;GO:0035194;GO:1901363;GO:0016787;GO:0050896	_	_	_	_	_	_	K11592	DICER1, DCR1
comp184322_c0_seq1	344	2-1033(-)	gi|383866145|ref|XP_003708532.1|	PREDICTED: tumor susceptibility gene 101 protein-like [Megachile rotundata]	0.64	GO:0046425;GO:0060439;GO:0045571;GO:0044424;GO:0005515;GO:0044130;GO:0035090;GO:0007430	_	_	_	_	_	_	K12183	TSG101, STP22, VPS23
comp184322_c0_seq2	157	2-472(-)	gi|411100664|gb|AFW03817.1|	Vps23 [Bombyx mori]	0.65	GO:0045571;GO:0046425;GO:0044130;GO:0005515;GO:0035090;GO:0060439;GO:0007430	_	_	_	_	_	_	K12183	TSG101, STP22, VPS23
comp184328_c0_seq1	713	1-2142(+)	gi|157129750|ref|XP_001661747.1|	ankyrin 2,3/unc44 [Aedes AAEL011565-PA [Aedes aegypti]	0.93	GO:0007165	7159.AAEL011565-PA	ankyrin 2,3/unc44	0.9307	COG0666	_	_	K10380	ANK
comp184328_c0_seq2	1939	1-5820(+)	gi|157129750|ref|XP_001661747.1|	ankyrin 2,3/unc44 [Aedes AAEL011565-PA [Aedes aegypti]	0.89	GO:0007165	7460.XP_392578	ankyrin	0.8858	COG0666	KOG4177	_	K10380	ANK
comp184328_c0_seq3	1956	122-5992(+)	gi|157129750|ref|XP_001661747.1|	ankyrin 2,3/unc44 [Aedes AAEL011565-PA [Aedes aegypti]	0.89	GO:0007528;GO:0048675;GO:1900074;GO:0007016;GO:0031594;GO:0042734;GO:0009941;GO:0005886;GO:0005856;GO:0000226;GO:0007165;GO:0036062;GO:0008092;GO:0005200;GO:0043195;GO:0006886;GO:0007605;GO:0070050;GO:0015450	7460.XP_392578	ankyrin	0.8858	COG0666	KOG4177	_	K10380	ANK
comp184328_c0_seq4	730	122-2314(+)	gi|347967519|ref|XP_003436078.1|	AGAP002272-PB [Anopheles gambiae str. PEST]	0.92	GO:0007528;GO:0048675;GO:1900074;GO:0007016;GO:0031594;GO:0042734;GO:0009941;GO:0005886;GO:0005856;GO:0000226;GO:0007165;GO:0036062;GO:0008092;GO:0005200;GO:0043195;GO:0006886;GO:0007605;GO:0070050;GO:0015450	7159.AAEL011565-PA	ankyrin 2,3/unc44	0.9311	COG0666	_	_	K10380	ANK
comp184328_c0_seq5	976	1-2931(+)	gi|157129750|ref|XP_001661747.1|	ankyrin 2,3/unc44 [Aedes AAEL011565-PA [Aedes aegypti]	0.89	GO:0007165	7460.XP_392578	ankyrin	0.8858	COG0666	KOG4177	_	K10380	ANK
comp184328_c0_seq6	993	122-3103(+)	gi|157129750|ref|XP_001661747.1|	ankyrin 2,3/unc44 [Aedes AAEL011565-PA [Aedes aegypti]	0.89	GO:0007528;GO:0048675;GO:1900074;GO:0007016;GO:0031594;GO:0042734;GO:0009941;GO:0005886;GO:0005856;GO:0000226;GO:0007165;GO:0036062;GO:0008092;GO:0005200;GO:0043195;GO:0006886;GO:0007605;GO:0070050;GO:0015450	7460.XP_392578	ankyrin	0.8858	COG0666	KOG4177	_	K10380	ANK
comp184342_c0_seq1	752	250-2508(+)	gi|307175299|gb|EFN65329.1|	Serine/threonine-protein kinase WNK1 [Camponotus floridanus]	0.8	GO:0004709;GO:0005524;GO:0009069;GO:0007178;GO:0000186	7425.XP_001607687	similar to serine/threonine-protein kinase wnk 1,3,4	0.9512	COG0515	KOG0584	_	K08867	WNK, PRKWNK
comp184362_c0_seq1	496	146-1633(+)	gi|91078502|ref|XP_969316.1|	PREDICTED: similar to tyrosine phosphatase, non-receptor type nt1 [Tribolium castaneum]	0.69	GO:0043231;GO:0007165;GO:0016311;GO:0044444;GO:0016791	_	_	_	_	_	_	K05696	PTPN1, PTP1B
comp184369_c0_seq1	562	39-1724(-)	gi|350400068|ref|XP_003485727.1|	PREDICTED: TGF-beta receptor type-1-like [Bombus impatiens]	0.84	GO:0016020;GO:0023014;GO:0005524;GO:0009069;GO:0005024;GO:0006468;GO:0007178;GO:0004702	7070.XP_971326	similar to activin receptor type I, putative	0.8328	COG0515	KOG2052	_	K13569	TGFBRN
comp184369_c0_seq2	438	39-1352(-)	gi|350400068|ref|XP_003485727.1|	PREDICTED: TGF-beta receptor type-1-like [Bombus impatiens]	0.84	GO:0016020;GO:0023014;GO:0005524;GO:0009069;GO:0005024;GO:0006468;GO:0007178;GO:0004702	7070.XP_971326	similar to activin receptor type I, putative	0.8328	COG0515	KOG2052	_	K13569	TGFBRN
comp184375_c0_seq1	579	98-1834(+)	gi|405963300|gb|EKC28886.1|	Serine/threonine-protein phosphatase 2A 56 kDa regulatory subunit delta isoform [Crassostrea gigas]	0.88	GO:0008601;GO:0007165;GO:0000159	99883.ENSTNIP00000016368	protein phosphatase 2, regulatory subunit B', delta isoform	0.9067	_	KOG2085	_	K11584	PPP2R5
comp184383_c0_seq1	410	68-1297(+)	gi|319738735|gb|ADV59558.1|	heat shock protein 40 [Paracyclopina nana]	0.84	GO:0006457;GO:0046872;GO:0005524;GO:0051082;GO:0031072;GO:0009408	7739.JGI264103	hypothetical protein	0.7562	COG0484	KOG0712	_	K09502	DNAJA1
comp184429_c0_seq1	778	208-2541(+)	gi|345480104|ref|XP_001606829.2|	PREDICTED: cullin-1 isoform 1 [Nasonia vitripennis]	0.88	GO:0000080;GO:0031146;GO:0031625;GO:0007050;GO:0019005;GO:0051437;GO:0005829;GO:0097193;GO:0008285;GO:0005654;GO:0006513;GO:0004842;GO:0000084;GO:0009887;GO:0031145;GO:0000082;GO:0007219;GO:0019048	7425.XP_001606829	similar to cullin 1	0.8859	COG5647	KOG2166	_	K03347	CUL1, CDC53
comp184440_c0_seq2	122	2-370(+)	gi|156353234|ref|XP_001622978.1|	predicted protein [Nematostella predicted protein [Nematostella vectensis]	0.54	GO:0016787;GO:0050896;GO:0065007	_	_	_	_	_	_	K01316	PRSS7
comp184457_c0_seq1	398	56-1249(+)	gi|225713408|gb|ACO12550.1|	GDP-mannose 4,6 dehydratase [Lepeophtheirus salmonis]	0.9	GO:0008417;GO:0006000;GO:0036065;GO:0005622;GO:0021564;GO:0010842;GO:0009298;GO:0021744;GO:0006012;GO:0070401;GO:0008446;GO:0007219;GO:0042351	9544.ENSMMUP00000007628	GDP-mannose 4,6-dehydratase	0.8512	COG1089	KOG1372	_	K01711	E4.2.1.47, gmd
comp184516_c0_seq1	359	150-1226(-)	gi|225717836|gb|ACO14764.1|	DNA repair protein RAD51 homolog 1 [Caligus clemensi]	0.91	GO:0005759;GO:0005524;GO:0006268;GO:0051260;GO:0003690;GO:0003697;GO:0007131;GO:0051106;GO:0000730;GO:0016605;GO:0042802;GO:0000800;GO:0043142;GO:0048471;GO:0008022;GO:0003684;GO:0006312	59729.ENSTGUP00000007594	DNA repair protein RAD51 homolog 1 (hRAD51)(HsRAD51) [Taeniopygia guttata]	0.8761	COG0468	KOG1433	_	K04482	RAD51
comp184532_c0_seq1	726	2-2179(+)	gi|498949959|ref|XP_004522937.1|	PREDICTED: long-chain-fatty-acid--CoA ligase 3-like isoform X2 [Ceratitis capitata]	0.73	GO:0005783;GO:0010890;GO:0004467;GO:0035282;GO:0005811;GO:0006631;GO:0007268;GO:0007411	_	_	_	_	_	_	K01897	ACSL, fadD
comp184532_c0_seq2	726	2-2179(+)	gi|498949959|ref|XP_004522937.1|	PREDICTED: long-chain-fatty-acid--CoA ligase 3-like isoform X2 [Ceratitis capitata]	0.73	GO:0005783;GO:0010890;GO:0004467;GO:0035282;GO:0005811;GO:0006631;GO:0007268;GO:0007411	_	_	_	_	_	_	K01897	ACSL, fadD
comp184532_c0_seq3	726	2-2179(+)	gi|498949959|ref|XP_004522937.1|	PREDICTED: long-chain-fatty-acid--CoA ligase 3-like isoform X2 [Ceratitis capitata]	0.73	GO:0005783;GO:0010890;GO:0004467;GO:0035282;GO:0005811;GO:0006631;GO:0007268;GO:0007411	_	_	_	_	_	_	K01897	ACSL, fadD
comp184532_c0_seq4	726	2-2179(+)	gi|498949959|ref|XP_004522937.1|	PREDICTED: long-chain-fatty-acid--CoA ligase 3-like isoform X2 [Ceratitis capitata]	0.73	GO:0005783;GO:0010890;GO:0004467;GO:0035282;GO:0005811;GO:0006631;GO:0007268;GO:0007411	_	_	_	_	_	_	K01897	ACSL, fadD
comp184578_c0_seq1	685	1-2055(-)	gi|391330077|ref|XP_003739491.1|	PREDICTED: uncharacterized protein LOC100902394 [Metaseiulus occidentalis]	0.66	GO:0043229;GO:0003729;GO:0044707;GO:0017091;GO:0006950;GO:0044763;GO:0006357;GO:0048523;GO:0000289;GO:0043488;GO:0044444;GO:0051239	_	_	_	_	_	_	K15308	TTP
comp184595_c0_seq1	417	_	gi|197129104|gb|ACH45602.1|	putative Cu/Zn superoxide dismutase variant 1 [Taeniopygia guttata]	0.83	GO:0006879;GO:0008217;GO:0005615;GO:0031410;GO:0001819;GO:0060087;GO:0002262;GO:0043025;GO:0007566;GO:0045471;GO:0006302;GO:0005507;GO:0008090;GO:0005955;GO:0006309;GO:0019430;GO:0042493;GO:0032839;GO:0043524;GO:0009408;GO:0001541;GO:0006749;GO:0030346;GO:0060047;GO:0008089;GO:0060052;GO:0004784;GO:0060088;GO:0040014;GO:0051087;GO:0005777;GO:0055114;GO:0007283;GO:0032287;GO:0005829;GO:0008270;GO:…	9031.ENSGALP00000035996	Superoxide dismutase [Cu-Zn] (EC 1.15.1.1); Destroys radicals which are normally produced wi [...]	0.8189	COG2032	KOG0441	_	K04565	E1.15.1.1C, sodC, SOD1
comp184622_c1_seq1	300	3-902(+)	gi|195055412|ref|XP_001994613.1|	GH15145 [Drosophila grimshawi]	0.6	GO:0044260;GO:0046872;GO:0005515;GO:0044238;GO:0006950	_	_	_	_	_	_	None	_
comp184624_c0_seq1	131	1-393(+)	gi|330801043|ref|XP_003288540.1|	hypothetical protein DICPUDRAFT_47974 [Dictyostelium purpureum]	0.73	GO:0016020;GO:0008152;GO:0050896;GO:0009987;GO:0044444;GO:0016491	_	_	_	_	_	_	K07304	msrA
comp184624_c0_seq3	123	1-369(+)	gi|330801043|ref|XP_003288540.1|	hypothetical protein DICPUDRAFT_47974 [Dictyostelium purpureum]	0.74	GO:0016020;GO:0006979;GO:0008152;GO:0009987;GO:0009507;GO:0016491	_	_	_	_	_	_	K07304	msrA
comp184624_c0_seq4	131	1-393(+)	gi|330801043|ref|XP_003288540.1|	hypothetical protein DICPUDRAFT_47974 [Dictyostelium purpureum]	0.73	GO:0016020;GO:0008152;GO:0050896;GO:0009987;GO:0044444;GO:0016491	_	_	_	_	_	_	K07304	msrA
comp184624_c0_seq8	123	1-369(+)	gi|330801043|ref|XP_003288540.1|	hypothetical protein DICPUDRAFT_47974 [Dictyostelium purpureum]	0.74	GO:0016020;GO:0006979;GO:0008152;GO:0009987;GO:0009507;GO:0016491	_	_	_	_	_	_	K07304	msrA
comp184641_c0_seq2	118	1-354(-)	gi|343183155|dbj|BAK61430.1|	myosin heavy chain type b [Marsupenaeus japonicus]	0.63	GO:0048017;GO:0006936;GO:0009792;GO:0043050;GO:0008307;GO:0040007;GO:0002119;GO:0005863	_	_	_	_	_	_	K10352	MYH
comp184645_c0_seq1	190	76-645(+)	gi|116007324|ref|NP_001036358.1|	bunched, isoform E [Drosophila bunched, isoform E [Drosophila melanogaster]	0.7	GO:0007297;GO:0046843;GO:0006970;GO:0008101;GO:0030307;GO:0005737;GO:0042246;GO:0035282;GO:0001751;GO:0009996;GO:0001709;GO:0005634;GO:0043066;GO:0042803;GO:0035071;GO:0007476;GO:0045746;GO:0007422;GO:0008284	_	_	_	_	_	_	None	_
comp184645_c0_seq10	342	2-1027(+)	gi|345498134|ref|XP_001605352.2|	PREDICTED: hypothetical protein LOC100121744 [Nasonia vitripennis]	0.63	GO:0006970	_	_	_	_	_	_	None	_
comp184645_c0_seq2	190	833-1402(+)	gi|116007324|ref|NP_001036358.1|	bunched, isoform E [Drosophila bunched, isoform E [Drosophila melanogaster]	0.7	GO:0007297;GO:0046843;GO:0006970;GO:0008101;GO:0030307;GO:0005737;GO:0042246;GO:0035282;GO:0001751;GO:0009996;GO:0001709;GO:0005634;GO:0043066;GO:0042803;GO:0035071;GO:0007476;GO:0045746;GO:0007422;GO:0008284	_	_	_	_	_	_	None	_
comp184645_c0_seq3	342	2-1027(+)	gi|345498134|ref|XP_001605352.2|	PREDICTED: hypothetical protein LOC100121744 [Nasonia vitripennis]	0.63	GO:0006970	_	_	_	_	_	_	None	_
comp184645_c0_seq4	342	2-1027(+)	gi|345498134|ref|XP_001605352.2|	PREDICTED: hypothetical protein LOC100121744 [Nasonia vitripennis]	0.63	GO:0006970	_	_	_	_	_	_	None	_
comp184645_c0_seq5	190	1000-1569(+)	gi|116007324|ref|NP_001036358.1|	bunched, isoform E [Drosophila bunched, isoform E [Drosophila melanogaster]	0.7	GO:0007297;GO:0046843;GO:0006970;GO:0008101;GO:0030307;GO:0005737;GO:0042246;GO:0035282;GO:0001751;GO:0009996;GO:0001709;GO:0005634;GO:0043066;GO:0042803;GO:0035071;GO:0007476;GO:0045746;GO:0007422;GO:0008284	_	_	_	_	_	_	None	_
comp184645_c0_seq6	137	115-525(+)	gi|344289040|ref|XP_003416254.1|	PREDICTED: TSC22 domain family protein 2-like, partial [Loxodonta africana]	0.62	GO:0006970	_	_	_	_	_	_	None	_
comp184645_c0_seq7	187	1-561(+)	gi|116007324|ref|NP_001036358.1|	bunched, isoform E [Drosophila bunched, isoform E [Drosophila melanogaster]	0.7	GO:0007297;GO:0046843;GO:0006970;GO:0008101;GO:0030307;GO:0005737;GO:0042246;GO:0035282;GO:0001751;GO:0009996;GO:0001709;GO:0005634;GO:0043066;GO:0042803;GO:0035071;GO:0007476;GO:0045746;GO:0007422;GO:0008284	_	_	_	_	_	_	None	_
comp184724_c0_seq1	549	1-1647(-)	gi|390339744|ref|XP_003725079.1|	PREDICTED: E3 ubiquitin-protein ligase HUWE1 isoform 1 [Strongylocentrotus purpuratus]	0.55	GO:0016574;GO:0005515;GO:0006284;GO:0005730;GO:0006513;GO:0005737;GO:0004842;GO:0000209	_	_	_	_	_	_	K10592	HUWE1, MULE, ARF-BP1
comp184766_c0_seq1	466	2-1402(+)	gi|260832584|ref|XP_002611237.1|	hypothetical protein BRAFLDRAFT_71198 [Branchiostoma floridae]	0.42	GO:0009653;GO:0006355;GO:0005622;GO:0016055;GO:0005488;GO:0044767;GO:0048731	_	_	_	_	_	_	None	_
comp184766_c0_seq3	378	1-1134(+)	gi|195492532|ref|XP_002094032.1|	GE20419 [Drosophila yakuba]	0.4	GO:0009653;GO:0006355;GO:0005622;GO:0016055;GO:0005488;GO:0044767;GO:0048731	_	_	_	_	_	_	None	_
comp184766_c0_seq4	309	1-930(+)	gi|195492532|ref|XP_002094032.1|	GE20419 [Drosophila yakuba]	0.4	GO:0009653;GO:0006355;GO:0005622;GO:0016055;GO:0005488;GO:0044767;GO:0048731	_	_	_	_	_	_	None	_
comp184766_c0_seq5	535	2-1606(+)	gi|260832584|ref|XP_002611237.1|	hypothetical protein BRAFLDRAFT_71198 [Branchiostoma floridae]	0.42	GO:0009653;GO:0006355;GO:0005622;GO:0016055;GO:0005488;GO:0044767;GO:0048731	_	_	_	_	_	_	None	_
comp184766_c0_seq7	340	1-1023(+)	gi|195492532|ref|XP_002094032.1|	GE20419 [Drosophila yakuba]	0.4	GO:0009653;GO:0006355;GO:0005622;GO:0016055;GO:0005488;GO:0044767;GO:0048731	_	_	_	_	_	_	None	_
comp184766_c0_seq8	497	2-1495(+)	gi|260832584|ref|XP_002611237.1|	hypothetical protein BRAFLDRAFT_71198 [Branchiostoma floridae]	0.42	GO:0009653;GO:0006355;GO:0005622;GO:0016055;GO:0005488;GO:0044767;GO:0048731	_	_	_	_	_	_	None	_
comp184781_c0_seq1	217	101-751(+)	gi|340709811|ref|XP_003393494.1|	PREDICTED: ras-related protein Rab-39B-like [Bombus terrestris]	0.85	GO:0007264;GO:0005525;GO:0015031	7460.XP_623117	Rab39 protein	0.8565	COG1100	KOG0091	_	K07976	RAB
comp184781_c0_seq2	217	101-751(+)	gi|340709811|ref|XP_003393494.1|	PREDICTED: ras-related protein Rab-39B-like [Bombus terrestris]	0.85	GO:0007264;GO:0005525;GO:0015031	7460.XP_623117	Rab39 protein	0.8565	COG1100	KOG0091	_	K07976	RAB
comp184785_c0_seq1	589	187-1953(-)	gi|296434245|ref|NP_001171792.1|	protein phosphatase 2, regulatory subunit A, alpha [Saccoglossus kowalevskii]	0.91	GO:0007059;GO:0046982;GO:0019814;GO:0000775;GO:0004722;GO:0070262;GO:0005829;GO:0006955;GO:0003823;GO:0042981;GO:0000159	28377.ENSACAP00000010388	protein phosphatase 2 (formerly 2A), regulatory subunit A, alpha isoform	0.8969	_	KOG0211	_	K03456	PPP2R1
comp184788_c0_seq1	163	42-533(+)	gi|432875150|ref|XP_004072699.1|	PREDICTED: uncharacterized protein LOC101169368 [Oryzias latipes]	0.59	GO:0051607;GO:0005737	_	_	_	_	_	_	None	_
comp184788_c0_seq2	343	42-1070(+)	gi|432875150|ref|XP_004072699.1|	PREDICTED: uncharacterized protein LOC101169368 [Oryzias latipes]	0.59	GO:0051607;GO:0005737	_	_	_	_	_	_	None	_
comp184790_c0_seq1	406	6-1223(-)	gi|242019688|ref|XP_002430291.1|	Niemann-Pick C1 protein precursor, putative [Pediculus humanus corporis]	0.68	GO:0007165;GO:0008158;GO:0016021;GO:0030301	_	_	_	_	_	_	K12385	NPC1
comp184825_c0_seq1	351	218-1270(+)	gi|470627419|ref|XP_004320673.1|	PREDICTED: LOW QUALITY PROTEIN: serine/threonine-protein kinase pim-3 [Tursiops truncatus]	0.65	GO:0061179;GO:0004674;GO:0005515;GO:0009069;GO:0007049;GO:0016572;GO:0046777;GO:0006915	_	_	_	_	_	_	K08807	PIM3
comp184827_c0_seq1	422	171-1436(+)	gi|291232208|ref|XP_002736051.1|	PREDICTED: phosphodiesterase 9A-like [Saccoglossus kowalevskii]	0.77	GO:0046872;GO:0004114;GO:0007165;GO:0006144	13616.ENSMODP00000006137	phosphodiesterase 9A	0.8468	_	KOG3689	_	K13761	PDE9
comp184827_c0_seq2	422	597-1862(+)	gi|291232208|ref|XP_002736051.1|	PREDICTED: phosphodiesterase 9A-like [Saccoglossus kowalevskii]	0.77	GO:0046872;GO:0004114;GO:0007165;GO:0006144	13616.ENSMODP00000006137	phosphodiesterase 9A	0.8468	_	KOG3689	_	K13761	PDE9
comp184838_c0_seq1	120	2-361(+)	gi|321476777|gb|EFX87737.1|	hypothetical protein DAPPUDRAFT_207386 [Daphnia pulex]	0.88	GO:0006561;GO:0005759;GO:0006537;GO:0004657;GO:0055114;GO:0006525;GO:0007626;GO:0042331;GO:0006562	_	_	_	_	_	_	K00318	E1.5.99.8
comp184850_c0_seq1	368	91-1194(+)	gi|225710952|gb|ACO11322.1|	GDP-mannose 4,6 dehydratase [Caligus rogercresseyi]	0.9	GO:0008417;GO:0006000;GO:0036065;GO:0005622;GO:0021564;GO:0010842;GO:0009298;GO:0021744;GO:0006012;GO:0070401;GO:0008446;GO:0007219;GO:0042351	9544.ENSMMUP00000007628	GDP-mannose 4,6-dehydratase	0.8663	COG1089	KOG1372	_	K01711	E4.2.1.47, gmd
comp184893_c0_seq1	435	3-1307(-)	gi|390346753|ref|XP_785765.3|	PREDICTED: DNA replication licensing factor MCM9 [Strongylocentrotus purpuratus]	0.72	GO:0000166;GO:0006260;GO:0017111;GO:0097362;GO:0000724;GO:0007292	_	_	_	_	_	_	K10738	MCM9
comp184893_c0_seq2	267	3-803(-)	gi|390346753|ref|XP_785765.3|	PREDICTED: DNA replication licensing factor MCM9 [Strongylocentrotus purpuratus]	0.72	GO:0000166;GO:0006260;GO:0017111;GO:0097362;GO:0000724;GO:0007292	_	_	_	_	_	_	K10738	MCM9
comp184893_c0_seq3	412	1-1236(-)	gi|390346753|ref|XP_785765.3|	PREDICTED: DNA replication licensing factor MCM9 [Strongylocentrotus purpuratus]	0.72	GO:0000166;GO:0006260;GO:0017111;GO:0097362;GO:0000724;GO:0007292	_	_	_	_	_	_	K10738	MCM9
comp184907_c0_seq1	379	55-1191(+)	gi|156541322|ref|XP_001600076.1|	PREDICTED: guanine nucleotide-binding protein subunit alpha homolog [Nasonia vitripennis]	0.78	GO:0007165;GO:0005515;GO:0019001	7425.XP_001600076	concertina	0.793	_	KOG0082	_	K04346	GNA12
comp184907_c0_seq2	379	350-1486(+)	gi|156541322|ref|XP_001600076.1|	PREDICTED: guanine nucleotide-binding protein subunit alpha homolog [Nasonia vitripennis]	0.78	GO:0007165;GO:0005515;GO:0019001	7425.XP_001600076	concertina	0.793	_	KOG0082	_	K04346	GNA12
comp184928_c0_seq1	1113	576-3914(+)	gi|383863057|ref|XP_003706999.1|	PREDICTED: uncharacterized protein LOC100876256 [Megachile rotundata]	0.75	GO:0007525;GO:0090249;GO:0005509;GO:0090244;GO:0001754;GO:0090263;GO:0036342	6945.ISCW019098-PA	protein phosphatase PP2A, putative	0.7947	_	KOG2562	_	K11583	PPP2R3
comp184952_c0_seq1	544	1-1632(+)	gi|443734429|gb|ELU18424.1|	hypothetical protein CAPTEDRAFT_162849 [Capitella teleta]	0.65	GO:0006351;GO:0006289;GO:0000439	7460.XP_623390	general transcription factor IIH subunit 1	0.8171	_	KOG2074	_	K03141	TFIIH1, GTF2H1, TFB1
comp185000_c0_seq1	261	82-864(-)	gi|91089287|ref|XP_971047.1|	PREDICTED: similar to Der1-like domain family, member 2 [Tribolium castaneum]	0.86	GO:0030970;GO:0005770;GO:0030176;GO:0030433;GO:0030307;GO:0030968;GO:0005769;GO:0008284	7070.XP_971047	similar to Der1-like domain family, member 2	0.8638	COG5291	KOG0858	_	K13989	DERL2_3
comp185000_c0_seq2	261	90-872(-)	gi|91089287|ref|XP_971047.1|	PREDICTED: similar to Der1-like domain family, member 2 [Tribolium castaneum]	0.86	GO:0030970;GO:0005770;GO:0030176;GO:0030433;GO:0030307;GO:0030968;GO:0005769;GO:0008284	7070.XP_971047	similar to Der1-like domain family, member 2	0.8638	COG5291	KOG0858	_	K13989	DERL2_3
comp185000_c0_seq3	253	82-840(-)	gi|91089287|ref|XP_971047.1|	PREDICTED: similar to Der1-like domain family, member 2 [Tribolium castaneum]	0.86	GO:0030970;GO:0005770;GO:0030176;GO:0030433;GO:0030307;GO:0030968;GO:0005769;GO:0008284	7070.XP_971047	similar to Der1-like domain family, member 2	0.8638	COG5291	KOG0858	_	K13989	DERL2_3
comp185000_c0_seq4	253	90-848(-)	gi|91089287|ref|XP_971047.1|	PREDICTED: similar to Der1-like domain family, member 2 [Tribolium castaneum]	0.86	GO:0030970;GO:0005770;GO:0030176;GO:0030433;GO:0030307;GO:0030968;GO:0005769;GO:0008284	7070.XP_971047	similar to Der1-like domain family, member 2	0.8638	COG5291	KOG0858	_	K13989	DERL2_3
comp185000_c0_seq5	253	63-821(-)	gi|91089287|ref|XP_971047.1|	PREDICTED: similar to Der1-like domain family, member 2 [Tribolium castaneum]	0.86	GO:0030970;GO:0005770;GO:0030176;GO:0030433;GO:0030307;GO:0030968;GO:0005769;GO:0008284	7070.XP_971047	similar to Der1-like domain family, member 2	0.8638	COG5291	KOG0858	_	K13989	DERL2_3
comp185000_c0_seq6	261	63-845(-)	gi|91089287|ref|XP_971047.1|	PREDICTED: similar to Der1-like domain family, member 2 [Tribolium castaneum]	0.86	GO:0030970;GO:0005770;GO:0030176;GO:0030433;GO:0030307;GO:0030968;GO:0005769;GO:0008284	7070.XP_971047	similar to Der1-like domain family, member 2	0.8638	COG5291	KOG0858	_	K13989	DERL2_3
comp185015_c0_seq12	83	2-250(+)	gi|332028749|gb|EGI68780.1|	Guanine nucleotide-binding protein subunit gamma-1 [Acromyrmex echinatior]	0.8	GO:0007186;GO:0005834;GO:0004871	7425.XP_001608259	similar to G protein gamma subunit	0.803	_	KOG4280	_	None	_
comp185015_c0_seq13	245	809-1543(+)	gi|462414897|gb|EMJ19634.1|	hypothetical protein PRUPE_ppa011636mg [Prunus persica]	0.55	GO:0044699;GO:0050896;GO:0009987	_	_	_	_	_	_	K06890	K06890
comp185015_c0_seq15	592	_	gi|345482281|ref|XP_003424561.1|	PREDICTED: guanine nucleotide-binding protein subunit gamma-1-like [Nasonia vitripennis]	0.85	GO:0007186;GO:0005834;GO:0004871	7425.XP_001608259	similar to G protein gamma subunit	0.8636	_	KOG4280	_	None	_
comp185015_c0_seq16	66	38-235(+)	gi|332028749|gb|EGI68780.1|	Guanine nucleotide-binding protein subunit gamma-1 [Acromyrmex echinatior]	0.8	GO:0007186;GO:0005834;GO:0004871	7425.XP_001608259	similar to G protein gamma subunit	0.803	_	KOG4280	_	None	_
comp185015_c0_seq17	607	_	gi|345482281|ref|XP_003424561.1|	PREDICTED: guanine nucleotide-binding protein subunit gamma-1-like [Nasonia vitripennis]	0.85	GO:0007186;GO:0005834;GO:0004871	7425.XP_001608259	similar to G protein gamma subunit	0.8636	_	KOG4280	_	None	_
comp185015_c0_seq18	388	_	gi|345482281|ref|XP_003424561.1|	PREDICTED: guanine nucleotide-binding protein subunit gamma-1-like [Nasonia vitripennis]	0.85	GO:0007186;GO:0005834;GO:0004871	7425.XP_001608259	similar to G protein gamma subunit	0.8636	_	KOG4280	_	None	_
comp185015_c0_seq19	253	695-1453(+)	gi|462414897|gb|EMJ19634.1|	hypothetical protein PRUPE_ppa011636mg [Prunus persica]	0.55	GO:0044699;GO:0050896;GO:0009987	_	_	_	_	_	_	K06890	K06890
comp185015_c0_seq5	245	695-1429(+)	gi|462414897|gb|EMJ19634.1|	hypothetical protein PRUPE_ppa011636mg [Prunus persica]	0.55	GO:0044699;GO:0050896;GO:0009987	_	_	_	_	_	_	K06890	K06890
comp185015_c0_seq7	253	809-1567(+)	gi|462414897|gb|EMJ19634.1|	hypothetical protein PRUPE_ppa011636mg [Prunus persica]	0.55	GO:0044699;GO:0050896;GO:0009987	_	_	_	_	_	_	K06890	K06890
comp185015_c0_seq8	373	_	gi|345482281|ref|XP_003424561.1|	PREDICTED: guanine nucleotide-binding protein subunit gamma-1-like [Nasonia vitripennis]	0.85	GO:0007186;GO:0005834;GO:0004871	7425.XP_001608259	similar to G protein gamma subunit	0.8636	_	KOG4280	_	None	_
comp185052_c0_seq1	274	3-824(-)	gi|260792591|ref|XP_002591298.1|	hypothetical protein BRAFLDRAFT_264103 [Branchiostoma floridae]	0.76	GO:0006457;GO:0046872;GO:0005524;GO:0051082;GO:0031072;GO:0009408	_	_	_	_	_	_	K09502	DNAJA1
comp185052_c0_seq2	395	105-1289(-)	gi|260792591|ref|XP_002591298.1|	hypothetical protein BRAFLDRAFT_264103 [Branchiostoma floridae]	0.76	GO:0006457;GO:0046872;GO:0005524;GO:0051082;GO:0031072;GO:0009408	_	_	_	_	_	_	K09502	DNAJA1
comp185053_c0_seq1	279	455-1291(+)	gi|321464449|gb|EFX75457.1|	hypothetical protein DAPPUDRAFT_214469 [Daphnia pulex]	0.66	GO:0030324;GO:0043200;GO:0060135;GO:0045428;GO:0071222;GO:0007494;GO:0071346;GO:0045988;GO:0050998;GO:0010963;GO:0009749;GO:0010269;GO:0033197;GO:0005739;GO:0071353;GO:0014075;GO:0042493;GO:0048678;GO:0004053;GO:0009635;GO:0006560;GO:0051001;GO:0071549;GO:0006915;GO:0001666;GO:0019547;GO:0046686;GO:0046689	_	_	_	_	_	_	K01476	E3.5.3.1, rocF, arg
comp185078_c0_seq1	348	1849-2892(-)	gi|91085999|ref|XP_972435.1|	PREDICTED: similar to cAMP-dependent protein kinase R2 [Tribolium castaneum]	0.77	GO:0045859;GO:0048148;GO:0005737;GO:0005515;GO:0008603;GO:0045475;GO:0016740;GO:0007411;GO:0005952;GO:0048149	7070.XP_972435	similar to CG15862-PA, isoform A	0.7835	COG0664	KOG1113	_	K04739	PRKAR
comp185078_c0_seq2	348	593-1636(-)	gi|91085999|ref|XP_972435.1|	PREDICTED: similar to cAMP-dependent protein kinase R2 [Tribolium castaneum]	0.77	GO:0045859;GO:0048148;GO:0005737;GO:0005515;GO:0008603;GO:0045475;GO:0016740;GO:0007411;GO:0005952;GO:0048149	7070.XP_972435	similar to CG15862-PA, isoform A	0.7835	COG0664	KOG1113	_	K04739	PRKAR
comp185078_c0_seq3	396	1838-3025(-)	gi|91085999|ref|XP_972435.1|	PREDICTED: similar to cAMP-dependent protein kinase R2 [Tribolium castaneum]	0.74	GO:0045859;GO:0048148;GO:0005737;GO:0005515;GO:0008603;GO:0045475;GO:0016740;GO:0007411;GO:0005952;GO:0048149	7070.XP_972435	similar to CG15862-PA, isoform A	0.7835	COG0664	_	_	K04739	PRKAR
comp185078_c0_seq4	396	593-1780(-)	gi|91085999|ref|XP_972435.1|	PREDICTED: similar to cAMP-dependent protein kinase R2 [Tribolium castaneum]	0.74	GO:0045859;GO:0048148;GO:0005737;GO:0005515;GO:0008603;GO:0045475;GO:0016740;GO:0007411;GO:0005952;GO:0048149	7070.XP_972435	similar to CG15862-PA, isoform A	0.7835	COG0664	_	_	K04739	PRKAR
comp185078_c0_seq5	396	1849-3036(-)	gi|91085999|ref|XP_972435.1|	PREDICTED: similar to cAMP-dependent protein kinase R2 [Tribolium castaneum]	0.74	GO:0045859;GO:0048148;GO:0005737;GO:0005515;GO:0008603;GO:0045475;GO:0016740;GO:0007411;GO:0005952;GO:0048149	7070.XP_972435	similar to CG15862-PA, isoform A	0.7835	COG0664	_	_	K04739	PRKAR
comp185078_c0_seq6	348	371-1414(-)	gi|91085999|ref|XP_972435.1|	PREDICTED: similar to cAMP-dependent protein kinase R2 [Tribolium castaneum]	0.77	GO:0045859;GO:0048148;GO:0005737;GO:0005515;GO:0008603;GO:0045475;GO:0016740;GO:0007411;GO:0005952;GO:0048149	7070.XP_972435	similar to CG15862-PA, isoform A	0.7835	COG0664	KOG1113	_	K04739	PRKAR
comp185078_c0_seq7	348	1838-2881(-)	gi|91085999|ref|XP_972435.1|	PREDICTED: similar to cAMP-dependent protein kinase R2 [Tribolium castaneum]	0.77	GO:0045859;GO:0048148;GO:0005737;GO:0005515;GO:0008603;GO:0045475;GO:0016740;GO:0007411;GO:0005952;GO:0048149	7070.XP_972435	similar to CG15862-PA, isoform A	0.7835	COG0664	KOG1113	_	K04739	PRKAR
comp185078_c0_seq9	396	371-1558(-)	gi|91085999|ref|XP_972435.1|	PREDICTED: similar to cAMP-dependent protein kinase R2 [Tribolium castaneum]	0.74	GO:0045859;GO:0048148;GO:0005737;GO:0005515;GO:0008603;GO:0045475;GO:0016740;GO:0007411;GO:0005952;GO:0048149	7070.XP_972435	similar to CG15862-PA, isoform A	0.7835	COG0664	_	_	K04739	PRKAR
comp185099_c0_seq1	626	24-1901(+)	gi|57525314|ref|NP_001006221.1|	replication protein A 70 kDa DNA-binding subunit [Gallus gallus]	0.6	GO:0006302;GO:0005654;GO:0005488	_	_	_	_	_	_	K07466	RFA1, RPA1, rpa
comp185105_c0_seq1	121	2-367(+)	gi|405965509|gb|EKC30878.1|	DnaJ-like protein subfamily B member 9 [Crassostrea gigas]	0.7	GO:0044260;GO:0046872;GO:0005515;GO:0044238;GO:0006950	69293.ENSGACP00000005437	DnaJ (Hsp40) homolog, subfamily B, member 9	0.7692	COG0484	_	_	K03686	dnaJ
comp185108_c1_seq1	421	254-1516(-)	gi|18858897|ref|NP_572375.1|	innexin 2, isoform A [Drosophila innexin 2, isoform B [Drosophila melanogaster]	0.66	GO:0016327;GO:0005921;GO:0016324;GO:0005243;GO:0007267;GO:0030727;GO:0007440;GO:0016331;GO:0042048;GO:0010496	_	_	_	_	_	_	None	_
comp185118_c0_seq1	540	1-1620(+)	gi|321463189|gb|EFX74207.1|	Cct5-prov protein [Daphnia pulex]	0.89	GO:0006457;GO:0005524;GO:0005874;GO:0006950;GO:0005813;GO:0005832;GO:0005730;GO:0051082;GO:0009615	7425.XP_001605758	similar to GM12270p	0.8826	COG0459	KOG0357	_	K09497	CCT5
comp185130_c0_seq1	88	616-879(-)	gi|155966240|gb|ABU41074.1|	phospholipid-hydroperoxide glutathione peroxidase [Lepeophtheirus salmonis]	0.81	GO:0006804;GO:0006979;GO:0006749;GO:0004602;GO:0055114	6945.ISCW022517-PA	phospholipid-hydroperoxide glutathione peroxidase, putative	0.7821	COG0386	KOG1651	_	K00432	E1.11.1.9
comp185133_c0_seq1	608	87-1910(-)	gi|332017727|gb|EGI58401.1|	Latrophilin-3 [Acromyrmex echinatior]	0.65	GO:0007165	_	_	_	_	_	_	K04593	LPHN2
comp185145_c0_seq1	146	3-440(-)	gi|334338449|ref|XP_001376329.2|	PREDICTED: methyl-CpG-binding domain protein 4-like [Monodelphis domestica]	0.63	GO:0005654;GO:0003696;GO:0006298;GO:0004520;GO:0005730;GO:0005515;GO:0045008;GO:0008263	_	_	_	_	_	_	K10801	MBD4
comp185145_c0_seq2	213	2-640(-)	gi|291236887|ref|XP_002738372.1|	PREDICTED: methyl-CpG binding domain protein 4-like [Saccoglossus kowalevskii]	0.8	GO:0008630;GO:0005634;GO:0003677;GO:0006284;GO:0006298;GO:0000785;GO:0005737;GO:0009314;GO:0031572;GO:0008263	_	_	_	_	_	_	K10801	MBD4
comp185145_c0_seq3	149	3-449(-)	gi|334338449|ref|XP_001376329.2|	PREDICTED: methyl-CpG-binding domain protein 4-like [Monodelphis domestica]	0.63	GO:0005654;GO:0003696;GO:0006298;GO:0004520;GO:0005730;GO:0005515;GO:0045008;GO:0008263	_	_	_	_	_	_	K10801	MBD4
comp185145_c0_seq4	197	2-592(-)	gi|291236887|ref|XP_002738372.1|	PREDICTED: methyl-CpG binding domain protein 4-like [Saccoglossus kowalevskii]	0.8	GO:0008630;GO:0005634;GO:0003677;GO:0006284;GO:0006298;GO:0000785;GO:0005737;GO:0009314;GO:0031572;GO:0008263	_	_	_	_	_	_	K10801	MBD4
comp185193_c0_seq1	584	284-2035(-)	gi|166798221|gb|ABY89662.1|	mitochondrial heat shock protein 60 [Calanus glacialis]	0.98	GO:0005524;GO:0006950;GO:0042026;GO:0005737	7425.XP_001600045	similar to ENSANGP00000014839	0.8696	COG0459	KOG0356	_	K04077	groEL, HSPD1
comp185231_c1_seq4	118	237-590(+)	gi|443707597|gb|ELU03110.1|	hypothetical protein CAPTEDRAFT_173738 [Capitella teleta]	0.85	GO:0000287;GO:0005524;GO:0005737;GO:0007243;GO:0071889;GO:0005730;GO:0045071;GO:0043525;GO:0001525;GO:0009069;GO:0006468;GO:0010628;GO:0004674;GO:0035063;GO:0000245;GO:0045070;GO:0045787;GO:0008284	7739.JGI224199	hypothetical protein	0.8362	_	KOG1290	_	K08831	SRPK2
comp185273_c0_seq1	541	3-1625(+)	gi|147906624|ref|NP_001081421.1|	6-4 photolyase [Xenopus laevis]	0.81	GO:0003914;GO:0006281;GO:0009416	8364.ENSXETP00000008500	hypothetical protein LOC100144974	0.7952	COG0415	KOG0133	_	None	_
comp185277_c0_seq1	481	34-1476(+)	gi|507972036|ref|XP_004690919.1|	PREDICTED: serine/threonine-protein kinase Chk2 [Condylura cristata]	0.56	GO:0044267;GO:0016310;GO:0042770;GO:0022402;GO:0090304;GO:0005488;GO:0006915;GO:0016772	_	_	_	_	_	_	K06641	CHK2
comp185277_c0_seq2	435	34-1341(+)	gi|432952945|ref|XP_004085256.1|	PREDICTED: serine/threonine-protein kinase Chk2-like [Oryzias latipes]	0.55	GO:0044267;GO:0016310;GO:0042770;GO:0022402;GO:0090304;GO:0005488;GO:0006915;GO:0016772	_	_	_	_	_	_	K06641	CHK2
comp185294_c0_seq1	337	44-1054(-)	gi|290462711|gb|ADD24403.1|	Coiled-coil domain-containing protein 94 [Lepeophtheirus salmonis]	0.73	GO:0043518;GO:0043524	7955.ENSDARP00000035484	coiled-coil domain containing 94	0.8333	COG5134	KOG2989	_	None	_
comp185294_c0_seq2	299	44-940(-)	gi|290462711|gb|ADD24403.1|	Coiled-coil domain-containing protein 94 [Lepeophtheirus salmonis]	0.71	GO:0043518;GO:0043524	7955.ENSDARP00000035484	coiled-coil domain containing 94	0.8406	COG5134	_	_	None	_
comp185339_c0_seq1	639	574-2493(+)	gi|405966430|gb|EKC31717.1|	Casein kinase I isoform epsilon [Crassostrea gigas]	0.88	GO:0005634;GO:0004674;GO:0005524;GO:0009069;GO:0006468;GO:0016055;GO:0005737	51511.ENSCSAVP00000013361	annotation not avaliable	0.9156	COG0515	KOG1164	_	K08959	CSNK1D
comp185339_c0_seq10	635	574-2478(+)	gi|193787308|dbj|BAG52514.1|	unnamed protein product [Homo sapiens]	0.79	GO:0005634;GO:0006281;GO:0009069;GO:0006468;GO:0030111;GO:0032436;GO:0005515;GO:0004674;GO:0000166;GO:0005829;GO:0000086	9544.ENSMMUP00000024099	casein kinase 1, epsilon	0.9054	COG0515	KOG1164	_	K08960	CSNK1E
comp185339_c0_seq11	612	574-2409(+)	gi|193787308|dbj|BAG52514.1|	unnamed protein product [Homo sapiens]	0.79	GO:0005634;GO:0006281;GO:0009069;GO:0006468;GO:0030111;GO:0032436;GO:0005515;GO:0004674;GO:0000166;GO:0005829;GO:0000086	9544.ENSMMUP00000024099	casein kinase 1, epsilon	0.9054	COG0515	KOG1164	_	K08960	CSNK1E
comp185339_c0_seq12	569	574-2283(+)	gi|193787308|dbj|BAG52514.1|	unnamed protein product [Homo sapiens]	0.79	GO:0005634;GO:0006281;GO:0009069;GO:0006468;GO:0030111;GO:0032436;GO:0005515;GO:0004674;GO:0000166;GO:0005829;GO:0000086	9544.ENSMMUP00000024099	casein kinase 1, epsilon	0.9054	COG0515	KOG1164	_	K08960	CSNK1E
comp185339_c0_seq13	661	574-2559(+)	gi|405966430|gb|EKC31717.1|	Casein kinase I isoform epsilon [Crassostrea gigas]	0.89	GO:0005634;GO:0005524;GO:0051225;GO:0009069;GO:0005813;GO:0032436;GO:0048471;GO:0090263;GO:0042752;GO:0004674;GO:0005794;GO:0001934;GO:0032922;GO:0005886;GO:0005876	51511.ENSCSAVP00000013361	annotation not avaliable	0.9349	COG0515	KOG1164	_	K08959	CSNK1D
comp185339_c0_seq14	727	574-2754(+)	gi|405966430|gb|EKC31717.1|	Casein kinase I isoform epsilon [Crassostrea gigas]	0.89	GO:0005634;GO:0005524;GO:0051225;GO:0009069;GO:0005813;GO:0032436;GO:0048471;GO:0090263;GO:0042752;GO:0004674;GO:0005794;GO:0001934;GO:0032922;GO:0005886;GO:0005876	51511.ENSCSAVP00000013361	annotation not avaliable	0.9349	COG0515	KOG1164	_	K08959	CSNK1D
comp185339_c0_seq15	591	574-2349(+)	gi|193787308|dbj|BAG52514.1|	unnamed protein product [Homo sapiens]	0.76	GO:0005634;GO:0006281;GO:0009069;GO:0006468;GO:0030111;GO:0032436;GO:0005515;GO:0004674;GO:0000166;GO:0005829;GO:0000086	9544.ENSMMUP00000024099	casein kinase 1, epsilon	0.9349	COG0515	KOG1164	_	K08960	CSNK1E
comp185339_c0_seq16	632	574-2469(+)	gi|193787308|dbj|BAG52514.1|	unnamed protein product [Homo sapiens]	0.76	GO:0005634;GO:0006281;GO:0009069;GO:0006468;GO:0030111;GO:0032436;GO:0005515;GO:0004674;GO:0000166;GO:0005829;GO:0000086	9544.ENSMMUP00000024099	casein kinase 1, epsilon	0.9349	COG0515	KOG1164	_	K08960	CSNK1E
comp185339_c0_seq2	682	574-2619(+)	gi|405966430|gb|EKC31717.1|	Casein kinase I isoform epsilon [Crassostrea gigas]	0.88	GO:0005634;GO:0004674;GO:0005524;GO:0009069;GO:0006468;GO:0016055;GO:0005737	51511.ENSCSAVP00000013361	annotation not avaliable	0.9156	COG0515	KOG1164	_	K08959	CSNK1D
comp185339_c0_seq3	704	574-2685(+)	gi|405966430|gb|EKC31717.1|	Casein kinase I isoform epsilon [Crassostrea gigas]	0.89	GO:0005634;GO:0005524;GO:0051225;GO:0009069;GO:0005813;GO:0032436;GO:0048471;GO:0090263;GO:0042752;GO:0004674;GO:0005794;GO:0001934;GO:0032922;GO:0005886;GO:0005876	51511.ENSCSAVP00000013361	annotation not avaliable	0.9349	COG0515	KOG1164	_	K08959	CSNK1D
comp185339_c0_seq4	702	574-2679(+)	gi|405966430|gb|EKC31717.1|	Casein kinase I isoform epsilon [Crassostrea gigas]	0.89	GO:0005634;GO:0005524;GO:0051225;GO:0009069;GO:0005813;GO:0032436;GO:0048471;GO:0090263;GO:0042752;GO:0004674;GO:0005794;GO:0001934;GO:0032922;GO:0005886;GO:0005876	51511.ENSCSAVP00000013361	annotation not avaliable	0.9349	COG0515	KOG1164	_	K08959	CSNK1D
comp185339_c0_seq5	610	574-2403(+)	gi|193787308|dbj|BAG52514.1|	unnamed protein product [Homo sapiens]	0.79	GO:0005634;GO:0006281;GO:0009069;GO:0006468;GO:0030111;GO:0032436;GO:0005515;GO:0004674;GO:0000166;GO:0005829;GO:0000086	9544.ENSMMUP00000024099	casein kinase 1, epsilon	0.9054	COG0515	KOG1164	_	K08960	CSNK1E
comp185339_c0_seq6	657	574-2544(+)	gi|193787308|dbj|BAG52514.1|	unnamed protein product [Homo sapiens]	0.76	GO:0005634;GO:0006281;GO:0009069;GO:0006468;GO:0030111;GO:0032436;GO:0005515;GO:0004674;GO:0000166;GO:0005829;GO:0000086	9544.ENSMMUP00000024099	casein kinase 1, epsilon	0.9349	COG0515	KOG1164	_	K08960	CSNK1E
comp185339_c0_seq7	705	574-2688(+)	gi|405966430|gb|EKC31717.1|	Casein kinase I isoform epsilon [Crassostrea gigas]	0.88	GO:0005634;GO:0004674;GO:0005524;GO:0009069;GO:0006468;GO:0016055;GO:0005737	51511.ENSCSAVP00000013361	annotation not avaliable	0.9156	COG0515	KOG1164	_	K08959	CSNK1D
comp185339_c0_seq8	634	574-2475(+)	gi|193787308|dbj|BAG52514.1|	unnamed protein product [Homo sapiens]	0.76	GO:0005634;GO:0006281;GO:0009069;GO:0006468;GO:0030111;GO:0032436;GO:0005515;GO:0004674;GO:0000166;GO:0005829;GO:0000086	9544.ENSMMUP00000024099	casein kinase 1, epsilon	0.9349	COG0515	KOG1164	_	K08960	CSNK1E
comp185339_c0_seq9	680	574-2613(+)	gi|405966430|gb|EKC31717.1|	Casein kinase I isoform epsilon [Crassostrea gigas]	0.88	GO:0005634;GO:0004674;GO:0005524;GO:0009069;GO:0006468;GO:0016055;GO:0005737	51511.ENSCSAVP00000013361	annotation not avaliable	0.9156	COG0515	KOG1164	_	K08959	CSNK1D
comp185378_c0_seq2	253	150-908(-)	gi|118792063|ref|XP_320130.3|	AGAP012424-PA [Anopheles gambiae str. PEST]	0.77	GO:0043548;GO:0051425;GO:0005009;GO:0008286;GO:0051290;GO:0043167;GO:0042169;GO:0046777;GO:0043559;GO:0005899;GO:0000166;GO:0043560	7165.AGAP012424-PA	Insulin receptor	0.7667	COG0515	_	_	K04527	INSR
comp185380_c0_seq1	430	134-1423(-)	gi|91085783|ref|XP_974443.1|	PREDICTED: similar to fumarylacetoacetate hydrolase [Tribolium castaneum]	0.8	GO:0004334;GO:0006570;GO:0042207	7070.XP_974443	PREDICTED: similar to fumarylacetoacetate hydrolase [Tribolium castaneum].	0.8043	COG0179	KOG2843	_	K01555	E3.7.1.2, FAH
comp185380_c0_seq2	335	134-1138(-)	gi|225713316|gb|ACO12504.1|	Fumarylacetoacetase [Lepeophtheirus Fumarylacetoacetase [Lepeophtheirus salmonis]	0.84	GO:0004334;GO:0006570;GO:0042207	7070.XP_974443	PREDICTED: similar to fumarylacetoacetate hydrolase [Tribolium castaneum].	0.8207	COG0179	KOG2843	_	K01555	E3.7.1.2, FAH
comp185399_c0_seq1	478	43-1476(+)	gi|148226240|ref|NP_001080593.1|	adenylosuccinate lyase [Xenopus Adsl-prov protein [Xenopus laevis]	0.86	GO:0006531;GO:0051262;GO:0009060;GO:0006522;GO:0006167;GO:0070626;GO:0005829;GO:0004018;GO:0007584;GO:0006144;GO:0005739	8364.ENSXETP00000013869	Adenylosuccinate lyase	0.8489	COG0015	KOG2700	_	K01756	E4.3.2.2, purB
comp185407_c0_seq1	222	1-666(+)	gi|270013763|gb|EFA10211.1|	hypothetical protein TcasGA2_TC012406 [Tribolium castaneum]	0.81	GO:0035556;GO:0051260	7070.XP_966398	similar to potassium channel tetramerisation domain containing 9	0.8408	COG1357	KOG1665	_	None	_
comp185407_c0_seq2	213	1-639(+)	gi|270013763|gb|EFA10211.1|	hypothetical protein TcasGA2_TC012406 [Tribolium castaneum]	0.81	GO:0035556;GO:0051260	7070.XP_966398	similar to potassium channel tetramerisation domain containing 9	0.8408	COG1357	KOG1665	_	None	_
comp185416_c0_seq1	398	117-1310(-)	gi|157109405|ref|XP_001650653.1|	ribosomal protein S6 kinase [Aedes aegypti]	0.68	GO:0043229;GO:0044267;GO:0048522;GO:0016310;GO:0004672;GO:0000166;GO:0035556;GO:0044444	7739.JGI123806	annotation not available	0.7532	COG0515	KOG0598	_	K04688	RPS6KB
comp185436_c0_seq1	709	2-2128(-)	gi|158294552|ref|XP_556301.3|	AGAP005655-PA [Anopheles gambiae str. PEST]	0.73	GO:0003677;GO:0007165;GO:0006355;GO:0005737;GO:0046983;GO:0005667;GO:0004871;GO:0045449;GO:0003700	_	_	_	_	_	_	K02296	ARNTL, BMAL1, CYC
comp185436_c0_seq2	723	72-2240(-)	gi|158294552|ref|XP_556301.3|	AGAP005655-PA [Anopheles gambiae str. PEST]	0.73	GO:0003677;GO:0007165;GO:0006355;GO:0005737;GO:0046983;GO:0005667;GO:0004871;GO:0045449;GO:0003700	_	_	_	_	_	_	K02296	ARNTL, BMAL1, CYC
comp185459_c0_seq1	604	3-1814(+)	gi|27882652|gb|AAH44026.1|	Eif2a protein [Xenopus laevis]	0.62	GO:0005840;GO:0043022;GO:0006468;GO:0000049;GO:0005850;GO:0019219;GO:0031325;GO:0006446;GO:0003743;GO:0010604;GO:0005515;GO:0005851;GO:0030968;GO:0042255	_	_	_	_	_	_	K15026	EIF2A
comp185481_c0_seq1	393	23-1201(+)	gi|225712412|gb|ACO12052.1|	Interleukin enhancer-binding factor 2 homolog [Lepeophtheirus salmonis]	0.87	GO:0003677;GO:0005524;GO:0005730;GO:0030529;GO:0006955;GO:0016740;GO:0003725;GO:0045893	7739.JGI279457	hypothetical protein	0.819	_	KOG3793	_	K13089	ILF2
comp185498_c0_seq1	260	161-943(+)	gi|194752675|ref|XP_001958645.1|	GF12464 [Drosophila ananassae]	0.57	GO:0046620;GO:0001558;GO:0006468;GO:0031594;GO:0043066;GO:0007166;GO:0045793;GO:0007476;GO:0051124;GO:0007276;GO:0006974	_	_	_	_	_	_	K00898	E2.7.11.2, PDK
comp185544_c0_seq1	522	3-1568(+)	gi|319738713|gb|ADV59547.1|	catalase [Paracyclopina nana]	0.86	GO:0020037;GO:0015947;GO:0055114;GO:0006804;GO:0046872;GO:0004096;GO:0006568;GO:0042744	7739.JGI259757	hypothetical protein	0.8379	COG0753	KOG0047	_	K03781	katE, CAT
comp1856087_c0_seq1	121	1-366(+)	gi|157167218|ref|XP_001652228.1|	atrial natriuretic peptide receptor [Aedes aegypti]	0.82	GO:0005524;GO:0006468;GO:0035556;GO:0006182;GO:0004672;GO:0016021;GO:0006144;GO:0046039;GO:0004383	7159.AAEL006806-PA	atrial natriuretic peptide receptor	0.8211	COG0515	_	_	K12323	ANPRA, NPR1
comp185608_c0_seq1	215	530-1174(+)	gi|498933896|ref|XP_004519751.1|	PREDICTED: oxidation resistance protein 1-like isoform X23 [Ceratitis capitata]	0.68	GO:0007476;GO:0005634;GO:0050829;GO:0002218;GO:0005737	_	_	_	_	_	_	None	_
comp185608_c0_seq2	215	588-1232(+)	gi|498933896|ref|XP_004519751.1|	PREDICTED: oxidation resistance protein 1-like isoform X23 [Ceratitis capitata]	0.68	GO:0007476;GO:0005634;GO:0050829;GO:0002218;GO:0005737	_	_	_	_	_	_	None	_
comp185634_c0_seq1	167	3-503(-)	gi|405978848|gb|EKC43209.1|	Exosome complex exonuclease RRP46 [Crassostrea gigas]	0.75	GO:0043928;GO:0051607;GO:0035327;GO:0051252;GO:0004532;GO:0045006;GO:0000178	7739.JGI124523	hypothetical protein	0.7603	COG0689	KOG1069	_	K12590	RRP46, EXOSC5
comp185646_c0_seq1	674	493-2517(+)	gi|442631071|ref|NP_001261587.1|	rhea, isoform G [Drosophila rhea, isoform G [Drosophila melanogaster]	0.7	GO:0006911;GO:0060439;GO:0007016;GO:0035160;GO:0008305;GO:0005178;GO:0016203;GO:0007430;GO:0045892;GO:0005856;GO:0007165;GO:0005925;GO:0007475;GO:0008360;GO:0005537;GO:0007526;GO:0003779;GO:0007155;GO:0005198	_	_	_	_	_	_	K06271	TLN
comp185646_c0_seq3	170	1-513(+)	gi|345491879|ref|XP_003426729.1|	PREDICTED: LOW QUALITY PROTEIN: talin-2-like [Nasonia vitripennis]	0.8	GO:0007165;GO:0005925;GO:0007016;GO:0005200;GO:0003779;GO:0001726;GO:0007155;GO:0005899;GO:0015629;GO:0005158	_	_	_	_	_	_	K06271	TLN
comp185666_c0_seq10	388	3-1166(+)	gi|405959616|gb|EKC25630.1|	Acetoacetyl-CoA synthetase [Crassostrea gigas]	0.78	GO:0030729;GO:0032024;GO:0005524;GO:0050872;GO:0045471;GO:0047760;GO:0005829;GO:0006631;GO:0007584;GO:0034201;GO:0042493;GO:0071394;GO:0001889;GO:0060612;GO:0014074;GO:0071397;GO:0071333;GO:0042594	10090.ENSMUSP00000031445	acetoacetyl-CoA synthetase Gene; Activates acetoacetate to acetoacetyl-CoA. May be involved [...]	0.799	COG0365	KOG1175	_	K01907	AACS, acsA
comp185666_c0_seq3	178	2-535(+)	gi|405959616|gb|EKC25630.1|	Acetoacetyl-CoA synthetase [Crassostrea gigas]	0.76	GO:0030729;GO:0032024;GO:0042493;GO:0014070;GO:0005524;GO:0001889;GO:0010243;GO:0045471;GO:0071333;GO:0047760;GO:0005829;GO:0006631;GO:0007584;GO:0034201	_	_	_	_	_	_	K01907	AACS, acsA
comp185666_c0_seq4	271	3-818(+)	gi|405959616|gb|EKC25630.1|	Acetoacetyl-CoA synthetase [Crassostrea gigas]	0.79	GO:0030729;GO:0032024;GO:0042493;GO:0014070;GO:0005524;GO:0001889;GO:0010243;GO:0045471;GO:0071333;GO:0047760;GO:0005829;GO:0006631;GO:0007584;GO:0034201	9823.ENSSSCP00000010417	acetoacetyl-CoA synthetase	0.8118	COG0365	KOG1175	_	K01907	AACS, acsA
comp185666_c0_seq5	184	2-556(+)	gi|405959616|gb|EKC25630.1|	Acetoacetyl-CoA synthetase [Crassostrea gigas]	0.79	GO:0030729;GO:0032024;GO:0042493;GO:0014070;GO:0005524;GO:0001889;GO:0010243;GO:0045471;GO:0071333;GO:0047760;GO:0005829;GO:0006631;GO:0007584;GO:0034201	_	_	_	_	_	_	K01907	AACS, acsA
comp185666_c0_seq6	372	2-1117(+)	gi|405959616|gb|EKC25630.1|	Acetoacetyl-CoA synthetase [Crassostrea gigas]	0.77	GO:0030729;GO:0032024;GO:0050872;GO:0045471;GO:0047760;GO:0000166;GO:0005829;GO:0007584;GO:0034201;GO:0042493;GO:0071394;GO:0001889;GO:0060612;GO:0014074;GO:0071397;GO:0071333;GO:0042594;GO:0006629	10090.ENSMUSP00000031445	acetoacetyl-CoA synthetase Gene; Activates acetoacetate to acetoacetyl-CoA. May be involved [...]	0.7902	COG0365	KOG1175	_	K01907	AACS, acsA
comp185666_c0_seq7	208	2-625(+)	gi|405959616|gb|EKC25630.1|	Acetoacetyl-CoA synthetase [Crassostrea gigas]	0.75	GO:0030729;GO:0032024;GO:0042493;GO:0014070;GO:0001889;GO:0010243;GO:0045471;GO:0071333;GO:0047760;GO:0000166;GO:0005829;GO:0007584;GO:0034201;GO:0006629	_	_	_	_	_	_	K01907	AACS, acsA
comp185666_c0_seq8	130	2-391(+)	gi|405959616|gb|EKC25630.1|	Acetoacetyl-CoA synthetase [Crassostrea gigas]	0.78	GO:0030729;GO:0032024;GO:0050872;GO:0045471;GO:0047760;GO:0005829;GO:0007584;GO:0034201;GO:0042493;GO:0071394;GO:0001889;GO:0060612;GO:0014074;GO:0071397;GO:0071333;GO:0042594;GO:0006629	_	_	_	_	_	_	K01907	AACS, acsA
comp185666_c0_seq9	255	2-769(+)	gi|405959616|gb|EKC25630.1|	Acetoacetyl-CoA synthetase [Crassostrea gigas]	0.78	GO:0030729;GO:0032024;GO:0042493;GO:0014070;GO:0005524;GO:0001889;GO:0010243;GO:0045471;GO:0071333;GO:0047760;GO:0005829;GO:0006631;GO:0007584;GO:0034201	_	_	_	_	_	_	K01907	AACS, acsA
comp185690_c0_seq1	450	1-1350(-)	gi|321460170|gb|EFX71215.1|	hypothetical protein DAPPUDRAFT_309186 [Daphnia pulex]	0.83	GO:0006457;GO:0005524;GO:0051082;GO:0006950	6085.XP_002157524	similar to predicted protein	0.8372	COG0326	KOG0020	_	K09487	HSP90B, TRA1
comp185692_c0_seq1	214	2-646(+)	gi|508699602|gb|EOX91498.1|	Poly(A) binding protein 8 [Theobroma cacao]	0.55	GO:0046686;GO:0003723;GO:0005515;GO:0005829	_	_	_	_	_	_	K13126	PABPC
comp185692_c0_seq6	162	2-490(+)	gi|508699602|gb|EOX91498.1|	Poly(A) binding protein 8 [Theobroma cacao]	0.56	GO:0046686;GO:0003723;GO:0005515;GO:0005829	_	_	_	_	_	_	K13126	PABPC
comp185706_c0_seq1	415	769-2013(-)	gi|345480387|ref|XP_001606953.2|	PREDICTED: hypothetical protein LOC100123328 [Nasonia vitripennis]	0.59	GO:0005634;GO:0048749;GO:0006355;GO:0007400;GO:0035222;GO:0007403;GO:0030177;GO:0008347;GO:0008586;GO:0007173;GO:0007379;GO:0007422;GO:0048106;GO:0007411;GO:0035321	_	_	_	_	_	_	None	_
comp185706_c0_seq2	313	769-1707(-)	gi|345480387|ref|XP_001606953.2|	PREDICTED: hypothetical protein LOC100123328 [Nasonia vitripennis]	0.59	GO:0005634;GO:0048749;GO:0006355;GO:0007400;GO:0035222;GO:0007403;GO:0030177;GO:0008347;GO:0008586;GO:0007173;GO:0007379;GO:0007422;GO:0048106;GO:0007411;GO:0035321	_	_	_	_	_	_	None	_
comp185740_c0_seq1	427	2-1282(+)	gi|405952768|gb|EKC20541.1|	Protein farnesyltransferase subunit beta [Crassostrea gigas]	0.78	GO:0014070;GO:0034097;GO:0019840;GO:0005515;GO:0051770;GO:0005875;GO:0008144;GO:0008270;GO:0008285;GO:0006694;GO:0018346;GO:0005965;GO:0042060;GO:0048146;GO:0042277;GO:0018343;GO:0004311;GO:0010035;GO:0016114;GO:0004660;GO:0045787	8090.ENSORLP00000013578	farnesyltransferase, CAAX box, beta	0.7556	COG5029	_	_	K05954	FNTB
comp185740_c0_seq2	427	2-1282(+)	gi|405952768|gb|EKC20541.1|	Protein farnesyltransferase subunit beta [Crassostrea gigas]	0.78	GO:0014070;GO:0034097;GO:0019840;GO:0005515;GO:0051770;GO:0005875;GO:0008144;GO:0008270;GO:0008285;GO:0006694;GO:0018346;GO:0005965;GO:0042060;GO:0048146;GO:0042277;GO:0018343;GO:0004311;GO:0010035;GO:0016114;GO:0004660;GO:0045787	8090.ENSORLP00000013578	farnesyltransferase, CAAX box, beta	0.7556	COG5029	_	_	K05954	FNTB
comp185747_c0_seq1	549	168-1814(+)	gi|241999658|ref|XP_002434472.1|	conserved hypothetical protein [Ixodes scapularis]	0.89	GO:0032444;GO:0072134;GO:0042177;GO:0030513;GO:0005737;GO:0001658;GO:0003682;GO:0005581;GO:0000987;GO:0007411;GO:0003700;GO:0072133;GO:0008285;GO:0071141;GO:0007492;GO:0045892;GO:0001702;GO:0051797;GO:0001666;GO:0005518;GO:0045944;GO:0048663;GO:0070411;GO:0031005;GO:0045449;GO:0032525;GO:0032909;GO:0007183;GO:0048733;GO:0051098;GO:0005730;GO:0010862;GO:0030616;GO:0070412;GO:0060021;GO:0048859;GO:…	6945.ISCW018468-PA	conserved hypothetical protein	0.893	_	KOG3701	_	K04501	SMAD4
comp185748_c0_seq2	475	331-1755(-)	gi|114658114|ref|XP_510672.2|	PREDICTED: serine/threonine-protein kinase ULK3 isoform 2 [Pan troglodytes]	0.62	GO:0005515;GO:0004674;GO:0009069;GO:0045880;GO:0005737;GO:0046777;GO:0045879	7719.ENSCINP00000005070	similar to unc-51-like kinase 3	0.7568	COG0515	_	_	K08269	ULK, ATG1
comp185748_c0_seq4	428	331-1614(-)	gi|114658114|ref|XP_510672.2|	PREDICTED: serine/threonine-protein kinase ULK3 isoform 2 [Pan troglodytes]	0.62	GO:0005515;GO:0004674;GO:0009069;GO:0045880;GO:0005737;GO:0046777;GO:0045879	_	_	_	_	_	_	K08269	ULK, ATG1
comp185750_c0_seq1	522	50-1615(+)	gi|321469546|gb|EFX80526.1|	hypothetical protein DAPPUDRAFT_51170 [Daphnia pulex]	0.83	GO:0016620;GO:0055114;GO:2001038	7739.JGI106815	hypothetical protein	0.8191	COG1012	KOG2450	_	K00128	E1.2.1.3
comp185753_c0_seq1	416	55-1302(+)	gi|343785574|gb|AEM59540.1|	8-oxoguanine DNA glycosylase [Tigriopus japonicus]	0.69	GO:0003677;GO:0006281;GO:0003824	_	_	_	_	_	_	K03660	OGG1
comp185778_c0_seq2	147	3-443(-)	gi|193577863|ref|XP_001944290.1|	PREDICTED: translation initiation factor eIF-2B subunit beta-like [Acyrthosiphon pisum]	0.67	GO:0005840;GO:0042552;GO:0051716;GO:0005524;GO:0005085;GO:0009408;GO:0001541;GO:0043087;GO:0003743;GO:0006446;GO:0005515;GO:0005851;GO:0005829;GO:0014003;GO:0005525	_	_	_	_	_	_	K03754	EIF2B2
comp185819_c0_seq4	548	403-2046(+)	gi|307167685|gb|EFN61188.1|	EH domain-containing protein 1 [Camponotus floridanus]	0.82	GO:0019497;GO:0006771;GO:0006184;GO:0005509;GO:0003993;GO:0005525;GO:0003924	7460.XP_396463	putative achaete scute target 1	0.8094	_	KOG1954	_	K12476	EHD3
comp185819_c0_seq9	321	403-1368(+)	gi|501297077|dbj|BAN21100.1|	past-1 [Riptortus pedestris]	0.84	GO:0019497;GO:0006771;GO:0006184;GO:0005509;GO:0003993;GO:0005525;GO:0003924	7460.XP_396463	putative achaete scute target 1	0.8531	_	KOG1954	_	K12476	EHD3
comp185830_c0_seq2	266	1-801(+)	gi|357624424|gb|EHJ75206.1|	past-1 [Danaus plexippus]	0.81	GO:0019497;GO:0006771;GO:0006184;GO:0005509;GO:0003993;GO:0005525;GO:0003924	6945.ISCW021581-PA	endocytosis/signaling protein EHD1, putative	0.8386	_	KOG1954	_	K12476	EHD3
comp185830_c0_seq3	279	1-840(+)	gi|501297077|dbj|BAN21100.1|	past-1 [Riptortus pedestris]	0.84	GO:0019497;GO:0006771;GO:0006184;GO:0005509;GO:0003993;GO:0005525;GO:0003924	6945.ISCW021581-PA	endocytosis/signaling protein EHD1, putative	0.839	_	KOG1954	_	K12476	EHD3
comp185833_c0_seq1	599	49-1845(+)	gi|74201470|dbj|BAE26163.1|	unnamed protein product [Mus musculus]	0.8	GO:0001841;GO:0060252;GO:0000132;GO:0001738;GO:0005938;GO:0016324;GO:0060042;GO:0045217;GO:0008078;GO:0001819;GO:0046326;GO:0007502;GO:0007015;GO:0070555;GO:0007097;GO:0090004;GO:0006468;GO:0043524;GO:0043220;GO:0005768;GO:0048194;GO:0034334;GO:0035089;GO:0009966;GO:0042462;GO:0031252;GO:0031226;GO:0005524;GO:0035556;GO:0002699;GO:0048546;GO:0016332;GO:0007405;GO:0005829;GO:0005923;GO:2000353;GO:…	69293.ENSGACP00000022412	protein kinase C, iota	0.8053	COG0515	KOG0695	_	K06069	APKC
comp185834_c0_seq2	658	33-2006(-)	gi|10880983|ref|NP_065857.1|	gephyrin isoform 1 [Homo sapiens]	0.7	GO:0045184;GO:0032947;GO:0007165;GO:0008092;GO:0005102;GO:0051260;GO:0005737;GO:0042803;GO:0032324;GO:0007529;GO:0019897;GO:0060077;GO:0016740;GO:0006767	_	_	_	_	_	_	K15376	GPHN
comp185838_c0_seq1	492	1-1476(-)	gi|48106779|ref|XP_396158.1|	PREDICTED: protein toll [Apis mellifera]	0.53	GO:0050794;GO:0044699;GO:0006952;GO:0006955;GO:0051707	_	_	_	_	_	_	None	_
comp185838_c0_seq4	496	1-1488(-)	gi|48106779|ref|XP_396158.1|	PREDICTED: protein toll [Apis mellifera]	0.53	GO:0050794;GO:0044699;GO:0006952;GO:0006955;GO:0051707	_	_	_	_	_	_	None	_
comp185840_c0_seq4	379	183-1322(+)	gi|375493328|dbj|BAL61212.1|	fem-1 homolog B-like protein [Locusta migratoria manilensis]	0.77	GO:0005634;GO:2000001;GO:0005737	7070.XP_975561	similar to feminization 1 homolog b	0.7599	COG0666	KOG0508	_	K10349	FEM1B
comp185851_c0_seq1	401	552-1754(+)	gi|345480355|ref|XP_001606358.2|	PREDICTED: SPRY domain-containing SOCS box protein 1-like [Nasonia vitripennis]	0.85	GO:0035556	7425.XP_001606358	similar to conserved hypothetical protein	0.9057	_	KOG3953	_	K10343	SPSB1_4, SSB1, SSB4
comp185851_c0_seq2	401	552-1754(+)	gi|345480355|ref|XP_001606358.2|	PREDICTED: SPRY domain-containing SOCS box protein 1-like [Nasonia vitripennis]	0.85	GO:0035556	7425.XP_001606358	similar to conserved hypothetical protein	0.9057	_	KOG3953	_	K10343	SPSB1_4, SSB1, SSB4
comp185854_c1_seq1	406	476-1693(-)	gi|227150229|gb|ACP19739.1|	putative retinoid X receptor [Calanus finmarchicus]	0.99	GO:0003707;GO:0006355;GO:0005667;GO:0008270;GO:0043565;GO:0043401;GO:0003700;GO:0045449	6945.ISCW005340-PA	retinoid X receptor, putative	0.792	_	KOG3575	_	K14030	NR2B4, usp
comp185854_c1_seq2	251	511-1263(-)	gi|227150229|gb|ACP19739.1|	putative retinoid X receptor [Calanus finmarchicus]	0.99	GO:0003707;GO:0006355;GO:0043005;GO:0008289;GO:0005667;GO:0008270;GO:0043565;GO:0043401;GO:0045449;GO:0003700	7668.XP_001201896	retinoic X receptor-like	0.7521	_	KOG3575	_	K08526	NR2B3, RXRG
comp185854_c1_seq3	406	511-1728(-)	gi|227150229|gb|ACP19739.1|	putative retinoid X receptor [Calanus finmarchicus]	0.99	GO:0003707;GO:0006355;GO:0005667;GO:0008270;GO:0043565;GO:0043401;GO:0003700;GO:0045449	6945.ISCW005340-PA	retinoid X receptor, putative	0.792	_	KOG3575	_	K14030	NR2B4, usp
comp185854_c1_seq4	251	476-1228(-)	gi|227150229|gb|ACP19739.1|	putative retinoid X receptor [Calanus finmarchicus]	0.99	GO:0003707;GO:0006355;GO:0043005;GO:0008289;GO:0005667;GO:0008270;GO:0043565;GO:0043401;GO:0045449;GO:0003700	7668.XP_001201896	retinoic X receptor-like	0.7521	_	KOG3575	_	K08526	NR2B3, RXRG
comp185854_c1_seq5	154	3-464(-)	gi|227150229|gb|ACP19739.1|	putative retinoid X receptor [Calanus finmarchicus]	0.99	GO:0003707;GO:0006355;GO:0005667;GO:0008270;GO:0043565;GO:0043401;GO:0003700;GO:0045449	_	_	_	_	_	_	K14030	NR2B4, usp
comp185859_c0_seq1	529	386-1972(-)	gi|499006199|ref|XP_004535765.1|	PREDICTED: longitudinals lacking protein, isoforms J/P/Q/S/Z-like isoform X1 [Ceratitis capitata]	0.75	GO:0019730;GO:0045893;GO:0031987;GO:0008406;GO:0002121;GO:0006357;GO:0005515;GO:0005667;GO:0045467;GO:0003700;GO:0016199;GO:0001964;GO:0007464;GO:0048854;GO:0046872;GO:0045476;GO:0045449	7244.FBpp0234549	GJ20132	0.7905	_	KOG4441	_	None	_
comp185859_c0_seq3	529	386-1972(-)	gi|499006199|ref|XP_004535765.1|	PREDICTED: longitudinals lacking protein, isoforms J/P/Q/S/Z-like isoform X1 [Ceratitis capitata]	0.75	GO:0019730;GO:0045893;GO:0031987;GO:0008406;GO:0002121;GO:0006357;GO:0005515;GO:0005667;GO:0045467;GO:0003700;GO:0016199;GO:0001964;GO:0007464;GO:0048854;GO:0046872;GO:0045476;GO:0045449	7244.FBpp0234549	GJ20132	0.7905	_	KOG4441	_	None	_
comp185868_c0_seq1	344	92-1123(+)	gi|91082059|ref|XP_971904.1|	PREDICTED: similar to LOC100037005 protein [Tribolium castaneum]	0.74	GO:0006851;GO:0070588;GO:0035786;GO:0019722;GO:0005743;GO:0005262;GO:0051561	7165.AGAP006330-PA	AGAP006330-PA	0.7704	_	KOG2966	_	None	_
comp185874_c0_seq1	127	72-452(-)	gi|260815617|ref|XP_002602569.1|	hypothetical protein BRAFLDRAFT_93876 [Branchiostoma floridae]	0.61	GO:0045892;GO:0035267;GO:0006338;GO:0006281;GO:0008168;GO:0043968;GO:0005488;GO:0043967;GO:0032259	_	_	_	_	_	_	K11324	DMAP1, SWC4, EAF2
comp185878_c0_seq2	133	1-399(+)	gi|260813824|ref|XP_002601616.1|	hypothetical protein BRAFLDRAFT_114917 [Branchiostoma floridae]	0.93	GO:0019852;GO:0046486;GO:0006096;GO:0055114;GO:0006574;GO:0006525;GO:0019482;GO:0006631;GO:0004029;GO:0006094;GO:0006547;GO:0006560;GO:0019260;GO:0006552;GO:0006554;GO:0006568;GO:0046251;GO:0006550;GO:0006699	_	_	_	_	_	_	K14085	ALDH7A1
comp185878_c0_seq4	175	2-526(+)	gi|443714190|gb|ELU06714.1|	hypothetical protein CAPTEDRAFT_179534 [Capitella teleta]	0.87	GO:0019852;GO:0046486;GO:0006096;GO:0055114;GO:0006574;GO:0006525;GO:0019482;GO:0006631;GO:0004029;GO:0006094;GO:0006547;GO:0006560;GO:0019260;GO:0006552;GO:0006554;GO:0006568;GO:0046251;GO:0006550;GO:0006699	6085.XP_002159090	similar to aldehyde dehydrogenase 7 family, member A1	0.8276	COG1012	KOG2453	_	K14085	ALDH7A1
comp185895_c0_seq3	495	134-1618(+)	gi|449481731|ref|XP_002192521.2|	PREDICTED: cytochrome P450 2D3-like [Taeniopygia guttata]	0.55	GO:0003958;GO:0043231;GO:0014070;GO:0001523;GO:0019369;GO:0006118;GO:0008392	_	_	_	_	_	_	K07414	CYP2D
comp185895_c0_seq4	347	134-1177(+)	gi|449481731|ref|XP_002192521.2|	PREDICTED: cytochrome P450 2D3-like [Taeniopygia guttata]	0.52	GO:0043231;GO:0003958;GO:0014070;GO:0001523;GO:0019369;GO:0006118;GO:0008392	_	_	_	_	_	_	K07414	CYP2D
comp185926_c0_seq1	568	431-2134(-)	gi|194768633|ref|XP_001966416.1|	GF22164 [Drosophila ananassae]	0.74	GO:0046847;GO:0048747;GO:0003136;GO:0006914;GO:0035170;GO:0005769;GO:0048190;GO:0045599;GO:0008544;GO:0001752;GO:0000977;GO:0045944;GO:0005771;GO:0008595;GO:0043499;GO:0030032;GO:0040034;GO:0035288;GO:0009608;GO:0007394;GO:0061320;GO:0061332;GO:0000122;GO:0061331;GO:0046672;GO:0035263;GO:0007223;GO:0005886;GO:0042691;GO:0030917;GO:0007479;GO:0007446;GO:0014019;GO:0060914;GO:0005112;GO:0035017;GO:…	7165.AGAP002165-PA	AGAP002165-PA	0.7609	_	KOG4441	_	K02174	BR-C
comp185939_c0_seq1	493	142-1620(-)	gi|363739855|ref|XP_415171.3|	PREDICTED: aldehyde dehydrogenase, mitochondrial isoformX2 [Gallus gallus]	0.86	GO:0019852;GO:0005759;GO:0006069;GO:0046486;GO:0006096;GO:0006118;GO:0006574;GO:0006525;GO:0019482;GO:0006631;GO:0006068;GO:0004029;GO:0009055;GO:0042136;GO:0006558;GO:0006094;GO:0006547;GO:0004030;GO:0006560;GO:0019260;GO:0006552;GO:0006568;GO:0006554;GO:0046251;GO:0006570;GO:0006699;GO:0006550	9031.ENSGALP00000007511	aldehyde dehydrogenase 2 family (mitochondrial)	0.8634	COG1012	KOG2450	_	K00128	E1.2.1.3
comp185948_c0_seq1	530	3-1595(+)	gi|332021625|gb|EGI61984.1|	DEP domain-containing protein 5 [Acromyrmex echinatior]	0.75	GO:0035556	_	_	_	_	_	_	None	_
comp185952_c0_seq1	283	143-991(-)	gi|158290919|ref|XP_312450.4|	AGAP002488-PA [Anopheles gambiae str. PEST]	0.59	GO:0045892;GO:0045747;GO:0003714;GO:0000785;GO:0007221;GO:0016481;GO:0061086;GO:0017053;GO:0005515;GO:0005667;GO:2000619;GO:0003682	_	_	_	_	_	_	None	_
comp185956_c0_seq1	544	3-1634(+)	gi|321469395|gb|EFX80375.1|	hypothetical protein DAPPUDRAFT_304007 [Daphnia pulex]	0.89	GO:0019497;GO:0006771;GO:0006184;GO:0005509;GO:0003993;GO:0005525;GO:0003924	7460.XP_396463	putative achaete scute target 1	0.8891	_	KOG1954	_	K12476	EHD3
comp185973_c0_seq6	459	_	gi|390369179|ref|XP_780332.3|	PREDICTED: mechanosensory protein 2-like [Strongylocentrotus purpuratus]	0.88	GO:0016021;GO:0007638;GO:0032589	7668.XP_001201946	similar to MEC-2	0.8837	COG0330	KOG2621	_	None	_
comp185999_c1_seq1	350	3-1055(+)	gi|157136759|ref|XP_001663831.1|	homogentisate 1,2-dioxygenase [Aedes aegypti]	0.86	GO:0004411;GO:0006570;GO:0055114;GO:0042207;GO:0006559	7159.AAEL013637-PA	homogentisate 1,2-dioxygenase	0.8616	COG3508	KOG1417	_	K00451	E1.13.11.5, hmgA
comp185999_c1_seq2	373	3-1121(+)	gi|157136759|ref|XP_001663831.1|	homogentisate 1,2-dioxygenase [Aedes aegypti]	0.85	GO:0004411;GO:0006570;GO:0055114;GO:0042207;GO:0006559	7159.AAEL013637-PA	homogentisate 1,2-dioxygenase	0.8522	COG3508	KOG1417	_	K00451	E1.13.11.5, hmgA
comp186003_c0_seq1	276	30-860(+)	gi|195379002|ref|XP_002048270.1|	GJ11442 [Drosophila virilis]	0.62	GO:0016310;GO:0016567;GO:0050896;GO:0044444;GO:0005488;GO:0042981	_	_	_	_	_	_	K04556	PARK2
comp186003_c0_seq2	242	108-836(+)	gi|195379002|ref|XP_002048270.1|	GJ11442 [Drosophila virilis]	0.63	GO:0016310;GO:0016567;GO:0050896;GO:0044444;GO:0005488;GO:0042981	_	_	_	_	_	_	K04556	PARK2
comp186003_c0_seq3	451	108-1460(+)	gi|195017155|ref|XP_001984548.1|	GH16528 [Drosophila grimshawi]	0.68	GO:0030382;GO:0048477;GO:1900407;GO:0007283;GO:0004842;GO:0031624;GO:0046329;GO:0051865;GO:0010821;GO:0005739;GO:0000266	_	_	_	_	_	_	K04556	PARK2
comp186003_c0_seq4	485	30-1484(+)	gi|195017155|ref|XP_001984548.1|	GH16528 [Drosophila grimshawi]	0.68	GO:0030382;GO:0048477;GO:1900407;GO:0007283;GO:0004842;GO:0031624;GO:0046329;GO:0051865;GO:0010821;GO:0005739;GO:0000266	_	_	_	_	_	_	K04556	PARK2
comp186025_c0_seq1	205	2-619(+)	gi|195431409|ref|XP_002063734.1|	GK15747 [Drosophila willistoni]	0.64	GO:0046620;GO:0001558;GO:0048477;GO:0006468;GO:0031594;GO:0043066;GO:0007166;GO:0045793;GO:0005737;GO:0007283;GO:0007476;GO:0007548;GO:0004672;GO:0051124;GO:0006974	_	_	_	_	_	_	K00898	E2.7.11.2, PDK
comp186025_c0_seq2	369	2-1111(+)	gi|157115926|ref|XP_001652718.1|	pyruvate dehydrogenase [Aedes AAEL007375-PC [Aedes aegypti]	0.72	GO:0046620;GO:0001558;GO:0048477;GO:0006468;GO:0031594;GO:0043066;GO:0007166;GO:0045793;GO:0005737;GO:0007283;GO:0007476;GO:0007548;GO:0004672;GO:0051124;GO:0006974	_	_	_	_	_	_	K00898	E2.7.11.2, PDK
comp186038_c0_seq1	161	48-530(-)	gi|260821380|ref|XP_002606011.1|	hypothetical protein BRAFLDRAFT_61506 [Branchiostoma floridae]	0.67	GO:0005634;GO:0003684;GO:0043161;GO:0006289	7739.JGI60393	hypothetical protein	0.8222	COG5272	KOG0011	_	K10839	RAD23, HR23
comp186038_c0_seq3	242	48-773(-)	gi|260821380|ref|XP_002606011.1|	hypothetical protein BRAFLDRAFT_61506 [Branchiostoma floridae]	0.68	GO:0005634;GO:0003684;GO:0043161;GO:0006289	7739.JGI60393	hypothetical protein	0.8372	COG5272	KOG0011	_	K10839	RAD23, HR23
comp186048_c0_seq1	322	1193-2158(+)	gi|512918891|ref|XP_004929243.1|	PREDICTED: protein muscleblind-like isoform X1 [Bombyx mori]	0.74	GO:0007525;GO:0005634;GO:0003677;GO:0000381;GO:0007517;GO:0048471;GO:0046716;GO:0006915;GO:0007476;GO:0045924;GO:0042052;GO:0009790;GO:0007422	7070.XP_001812946	similar to muscleblind CG33197-PA	0.7815	_	KOG2494	_	K14943	MBNL
comp186048_c0_seq12	196	1193-1780(+)	gi|512918891|ref|XP_004929243.1|	PREDICTED: protein muscleblind-like isoform X1 [Bombyx mori]	0.74	GO:0007525;GO:0005634;GO:0003677;GO:0000381;GO:0007517;GO:0048471;GO:0046716;GO:0006915;GO:0007476;GO:0045924;GO:0042052;GO:0009790;GO:0007422	7070.XP_001812946	similar to muscleblind CG33197-PA	0.7815	_	KOG2494	_	K14943	MBNL
comp186048_c0_seq15	255	1193-1957(+)	gi|498924327|ref|XP_004517402.1|	PREDICTED: platelet binding protein GspB-like isoform X10 [Ceratitis capitata]	0.71	GO:0007525;GO:0005634;GO:0003677;GO:0000381;GO:0007517;GO:0048471;GO:0046716;GO:0006915;GO:0007476;GO:0045924;GO:0042052;GO:0009790;GO:0007422	7425.XP_001604553	similar to conserved hypothetical protein	0.7838	_	KOG2494	_	K14943	MBNL
comp186048_c0_seq4	196	1193-1780(+)	gi|512918891|ref|XP_004929243.1|	PREDICTED: protein muscleblind-like isoform X1 [Bombyx mori]	0.74	GO:0007525;GO:0005634;GO:0003677;GO:0000381;GO:0007517;GO:0048471;GO:0046716;GO:0006915;GO:0007476;GO:0045924;GO:0042052;GO:0009790;GO:0007422	7070.XP_001812946	similar to muscleblind CG33197-PA	0.7815	_	KOG2494	_	K14943	MBNL
comp186048_c0_seq5	363	1193-2281(+)	gi|512918891|ref|XP_004929243.1|	PREDICTED: protein muscleblind-like isoform X1 [Bombyx mori]	0.74	GO:0007525;GO:0005634;GO:0003677;GO:0000381;GO:0007517;GO:0048471;GO:0046716;GO:0006915;GO:0007476;GO:0045924;GO:0042052;GO:0009790;GO:0007422	7070.XP_001812946	similar to muscleblind CG33197-PA	0.7815	_	KOG2494	_	K14943	MBNL
comp186048_c0_seq6	196	1193-1780(+)	gi|512918891|ref|XP_004929243.1|	PREDICTED: protein muscleblind-like isoform X1 [Bombyx mori]	0.74	GO:0007525;GO:0005634;GO:0003677;GO:0000381;GO:0007517;GO:0048471;GO:0046716;GO:0006915;GO:0007476;GO:0045924;GO:0042052;GO:0009790;GO:0007422	7070.XP_001812946	similar to muscleblind CG33197-PA	0.7815	_	KOG2494	_	K14943	MBNL
comp186048_c0_seq7	196	1193-1780(+)	gi|512918891|ref|XP_004929243.1|	PREDICTED: protein muscleblind-like isoform X1 [Bombyx mori]	0.74	GO:0007525;GO:0005634;GO:0003677;GO:0000381;GO:0007517;GO:0048471;GO:0046716;GO:0006915;GO:0007476;GO:0045924;GO:0042052;GO:0009790;GO:0007422	7070.XP_001812946	similar to muscleblind CG33197-PA	0.7815	_	KOG2494	_	K14943	MBNL
[truncated: 554 more rows]

## Sheet: KEGG Lipid metabolism
transcript_id	Qeury_length	ORF	NR_tophit_name	NR_tophit_description	NR_topHSP_%-Simil	GOs	String_tophit_name	String_tophit_description	String_topHSP_%-Simil	COG	KOG	NOG	KO/Gene_ID	KEGG_GENE_NAME
[truncated: 740 more rows]

## Sheet: KEGG Immune system
transcript_id	Qeury_length	ORF	NR_tophit_name	NR_tophit_description	NR_topHSP_%-Simil	GOs	String_tophit_name	String_tophit_description	String_topHSP_%-Simil	COG	KOG	NOG	KO/Gene_ID	KEGG_GENE_NAME
[truncated: 698 more rows]

[truncated: 1 more sheets: KEGG Development]
